# Supplementary material for: Integrated analysis of multi-omics and fine-mapping reveals a candidate gene regulating pericarp color and flavonoids accumulation in wax gourd (Benincasa hispida)
Source: Front Plant Sci. 2022 Sep 26;13:1019787. doi: 10.3389/fpls.2022.1019787 (PMC9549291; doi:10.3389/fpls.2022.1019787)
Supplement: Supplementary file 2 [file Table_2.xlsx]

## Sheet: TableS2
Fig. S2. The expression heatmap of BhiPRR6 (red color) and all highly co-expressed genes by RNA-seq analysis. All samples were collected at 40 DAP peels of wax gourd.
Index	Formula	Compounds	Class I	Class II	CAS	Level	GW4-1	GW4-2	GW4-3	GM4-1	GM4-2	GM4-3	VIP	Fold_Change	Log2FC	Type	p-value
Lmgp004829	C23H24O12	5,7,4'-Trihydroxy-6,8-dimethoxyisoflavone-7-O-galactoside*	Flavonoids	Flavonoid	-	B	9	9	9	22580	20324	15930	1.48088	2179.04	11.0895	up	0.00977582
HJAP005	C22H22O13	Laricitrin-3-O-glucoside	Flavonoids	Flavonols	-	B	9	9	9	18814	13246	13356	1.48071	1682.07	10.716	up	0.0144384
pme2954	C15H10O7	Quercetin	Flavonoids	Dihydroflavonol	480-18-2	A	4372.8	9	9	9807.1	10060	10888	1.14581	7.00444	2.80827	up	0.0219562
Lmnp202580	C26H28O14	Apigenin-8-C-(2''-xylosyl)glucoside*	Flavonoids	Flavonoid carbonoside	-	A	229720	197650	242090	1066900	1442600	1347100	1.46222	5.76076	2.52626	up	0.0102806
Lmcp003402	C22H22O12	Tamarixetin-3-O-glucoside (Tamarixin)	Flavonoids	Dihydroflavone	-	B	7237.9	21034	13843	69726	65490	52994	1.37276	4.46896	2.15994	up	0.00196834
pmp000117	C22H24O9	3,5,6,7,8,3',4'-Heptamethoxyflavone	Flavonoids	Flavanols	130405-40-2	B	9	9	4749.7	11113	5172.6	4439.9	1.0845	4.34706	2.12004	up	0.119609
Hmln000873	C13H16O10	2-O-Galloyl-D-glucose*	Flavonoids	Isoflavones	529-59-9	A	30952	89396	79248	277390	304210	197120	1.3283	3.90148	1.96402	up	0.0120614
Xmgp006913	C20H20O5	2,4,2',4'-tetrahydroxy-3'-prenylchalcone	Flavonoids	Flavonoid	578-74-5	A	1083500	2806100	2364600	8859700	8580900	5599600	1.34186	3.68396	1.88126	up	0.0181682
pme3227	C27H30O14	Vitexin-2''-O-rhamnoside	Flavonoids	Flavonoid	-	B	83446	135110	79639	358250	399230	310290	1.42504	3.58078	1.84027	up	0.00194305
Lmgp004731	C21H20O10	Genistein-7-O-galactoside	Flavonoids	Flavonoid carbonoside	3682-02-8	B	657960	1787800	1316800	5198400	4838600	3361000	1.33808	3.56087	1.83223	up	0.0134883
Hmln000659	C13H16O10	3-O-Galloyl-D-glucose*	Flavonoids	Flavonoid carbonoside	29702-25-8	A	272040	834220	630150	2100800	2214800	1346900	1.28233	3.26104	1.70533	up	0.0217778
Hmgp003664	C21H20O9	Apigenin-6-C-rhamnoside	Flavonoids	Isoflavones	-	A	739710	2078300	1383300	4454700	5462000	3413300	1.30458	3.17282	1.66577	up	0.0173165
mws1434	C21H20O10	Apigenin-6-C-glucoside (Isovitexin)*	Flavonoids	Flavonoid carbonoside	3681-93-4	A	268060	726640	539970	1741000	1733900	1197000	1.30667	3.04424	1.60608	up	0.0116072
Lmcp007240	C19H18O6	5,6,7,4'-Tetramethoxyflavone	Flavonoids	Flavonoid	-	A	461020	1192300	885390	2901700	2882800	1919400	1.31302	3.03457	1.60149	up	0.0157563
mws0895	C21H20O10	Genistein-7-O-Glucoside (Genistin)	Flavonoids	Flavonoid	28757-27-9	B	472220	1218600	997660	3188200	2657600	2159200	1.31162	2.97752	1.57411	up	0.0106193
HJAP026	C28H32O16	Chrysoeriol-6-C-glucoside-4'-O-glucoside	Flavonoids	Flavonoid carbonoside	-	B	8367.8	13728	8822	34377	44780	11696	1.12755	2.93853	1.5551	up	0.174076
mws1608	C21H20O11	Luteolin-6-C-glucoside (Isoorientin)	Flavonoids	Flavanols	989-51-5	B	7736.6	5810.4	7342.5	38675	8875	13367	1.07821	2.91615	1.54407	up	0.286691
pmb2984	C23H24O12	Eriodictyol-7-O-(6''-acetyl)glucoside	Flavonoids	Isoflavones	51011-05-3	A	54202	171160	146120	359410	380440	314790	1.24821	2.83901	1.50539	up	0.0102613
Lmsp008681	C18H18O6	5-Hydroxy-7,8,4'-Trimethoxyflavanone	Flavonoids	Flavonoid	-	A	109480	152600	261690	589270	327410	551830	1.27385	2.80373	1.48735	up	0.0409242
mws0048	C21H20O10	Apigenin-8-C-Glucoside (Vitexin)*	Flavonoids	Flavonoid	-	A	23179	56486	34877	96908	121200	73594	1.2722	2.54668	1.34862	up	0.0293377
mws0072	C21H20O10	Apigenin-5-O-glucoside	Flavonoids	Chalcones	4547-85-7	A	34540	90407	67486	159070	182000	123190	1.24351	2.41258	1.27058	up	0.0185044
pmp000413	C21H20O10	Genistein-8-C-glucoside	Flavonoids	Flavonoid	-	A	18676	60316	29835	84321	106090	68649	1.1831	2.38048	1.25125	up	0.0396166
Hmgp003641	C28H32O14	Chrysoeriol-6-C-rhamnoside-7-O-rhamnoside	Flavonoids	Flavonoid carbonoside	61360-94-9	A	2093800	3072500	2287400	6291900	5959900	5457700	1.42785	2.37593	1.24849	up	0.0010765
HJN104	C21H22O13	Dihydromyricetin-3-O-glucoside	Flavonoids	Flavonols	-	B	46122	60892	40127	124120	122540	97454	1.41071	2.33867	1.22569	up	0.00479841
pmc1990	C17H16O5	4'-Hydroxy-5,7-dimethoxyflavanone	Flavonoids	Flavonoid	18003-33-3	B	9	9	22632	19640	21345	10586	1.01633	2.27687	1.18705	up	0.333556
Xmyp005654	C21H20O11	Kaempferol-4'-O-glucoside	Flavonoids	Dihydroflavone	-	B	2766.3	6537	3655	11312	10363	6975.8	1.22676	2.211	1.1447	up	0.0407526
pmb0623	C28H32O16	Chrysoeriol-6-C-glucoside-7-O-glucoside	Flavonoids	Flavonoid	-	B	515280	924780	504310	1558400	1452100	1152900	1.30619	2.14126	1.09846	up	0.0164209
Lmnp002845	C22H22O11	Hispidulin-8-C-glucoside	Flavonoids	Flavonoid	72741-92-5	B	2804	5356.3	3650.8	6369.2	8711.8	10141	1.23759	2.13545	1.09454	up	0.0342725
pmp000593	C27H30O15	Luteolin-7-O-rutinoside*	Flavonoids	Flavonols	59262-54-3	B	31372	33697	60975	17933	22778	19628	1.25138	0.478714	-1.06276	down	0.144864
pmp000194	C24H22O13	6''-O-Malonylgenistin	Flavonoids	Flavonoid	-	B	110200	125710	81781	45904	48542	57112	1.39269	0.477061	-1.06775	down	0.0423385
mws1073	C27H30O15	Apigenin-6,8-di-C-glucoside (Vicenin-2)	Flavonoids	Flavonoid carbonoside	-	B	62335	51266	27358	17293	15735	29133	1.18864	0.440986	-1.18119	down	0.111213
pmp000237	C26H26O15	Apigenin-6-C-(2''-glucuronyl)xyloside	Flavonoids	Dihydroflavone	10236-47-2	B	9	21120	20123	39602	48871	42848	0.790968	3.18339	1.67056	insig	0.034913
Lmlp005572	C21H20O10	Galangin-7-O-glucoside	Flavonoids	Dihydroflavonol	572-31-6	B	9	12862	12569	40638	42445	35701	0.866672	4.66918	2.22317	insig	0.00807972
pmp000579	C22H22O11	Diosmetin-7-O-galactoside*	Flavonoids	Isoflavones	73566-30-0	B	9	4465.5	3144.7	8490.1	6439.9	8559.7	0.820849	3.08296	1.62432	insig	0.0377205
Lmlp002990	C27H30O15	Isosaponarin(Isovitexin-4'-O-glucoside)	Flavonoids	Flavonoid	-	A	10352	9	9717	17316	26877	17125	0.815051	3.05399	1.6107	insig	0.0416251
mws2209	C21H20O11	Kaempferol-3-O-glucoside (Astragalin)	Flavonoids	Flavanols	5127-64-0	B	6102.8	8875.2	10364	47148	8416.9	12670	0.87162	2.69256	1.42898	insig	0.363764
pmb2586	C30H26O13	Gallocatechin-(4α→8)-catechin	Flavonoids	Flavonoid	23666-13-9	B	137750	245670	197520	415880	397680	342590	1.32787	1.99014	0.992868	insig	0.0097336
Hmmn003659	C25H26O14	Limocitrin-7-O-(6''-Acetyl)glucoside	Flavonoids	Isoflavones	-	B	147650	138290	117210	265040	260580	272440	1.44798	1.97956	0.98518	insig	0.00179022
mws1179	C21H22O10	Naringenin-7-O-glucoside (Prunin)	Flavonoids	Flavonoid	6920-38-3	B	37484	85081	33928	83324	121770	96245	1.11187	1.92557	0.945289	insig	0.0814813
mws1299	C21H20O11	Luteolin-8-C-glucoside (Orientin)	Flavonoids	Flavonoid	-	A	52078	97146	78766	133110	129100	176250	1.23528	1.92315	0.943475	insig	0.0254345
Lmfn000604	C13H16O10	6-O-Galloyl-D-glucose*	Flavonoids	Flavonoid	-	B	12175	32308	40751	60194	52542	43204	1.01776	1.82955	0.87149	insig	0.0898115
pmp000411	C26H28O14	Genistein-8-C-apiosyl(1→6)glucoside	Flavonoids	Flavonoid	17306-46-6	B	146960	176160	171610	298520	331790	251690	1.41093	1.78279	0.834137	insig	0.0198278
pme1611	C21H22O10	Isohemiphloin	Flavonoids	Flavonols	16290-07-6	A	11793	33063	21279	40533	32470	42715	1.04693	1.74972	0.807127	insig	0.0972488
pmb0608	C25H24O14	Chrysoeriol-7-O-(6''-malonyl)glucoside	Flavonoids	Flavonoid	-	B	134060	140170	128260	192440	289680	219940	1.33566	1.74429	0.802641	insig	0.0727302
HJN086	C21H22O11	Eriodictyol-3'-O-glucoside	Flavonoids	Flavonoid carbonoside	-	B	108420	303330	107530	275120	315590	311670	1.01737	1.73775	0.797222	insig	0.184982
Lmlp003531	C21H20O11	Luteolin-3'-O-glucoside*	Flavonoids	Flavonoid	301-16-6	A	99610	237650	119480	269860	212070	291190	1.05639	1.69269	0.759319	insig	0.118144
pme2459	C21H20O11	Luteolin-7-O-glucoside (Cynaroside)	Flavonoids	Flavonoid carbonoside	28608-75-5	A	1548700	4127100	2328900	4115600	4729800	4398700	1.03942	1.65454	0.726431	insig	0.143235
Lmgp004474	C27H30O14	Genistein-7-O-galactoside-rhamnose	Flavonoids	Flavanols	-	B	4560.5	3644.3	3302.2	6420.6	6066.1	6432.6	1.38324	1.64416	0.717347	insig	0.0153048
Lmbp002592	C27H30O16	Kaempferol-3,7-di-O-glucoside	Flavonoids	Flavonoid carbonoside	-	B	28446	35767	14680	50026	34540	43982	1.01703	1.6294	0.704338	insig	0.102878
Hmpp003270	C21H20O11	Luteolin-4'-O-glucoside*	Flavonoids	Flavonoid	5154-41-6	B	31991	106180	78635	99488	134160	111840	0.888278	1.59354	0.672231	insig	0.175943
mws0047	C27H30O14	Apigenin-7-O-neohesperidoside (Rhoifolin)	Flavonoids	Flavonoid carbonoside	19416-87-6	A	8417700	13254000	9266200	15635000	16497000	16750000	1.26247	1.58	0.659928	insig	0.0507464
pme0321	C21H20O10	Kaempferol-7-O-rhamnoside	Flavonoids	Dihydroflavone	529-55-5	A	15796	39722	28280	39655	58250	34001	0.917788	1.57409	0.654522	insig	0.186711
Cmsn000894	C14H18O11	7-O-Galloyl-D-sedoheptulose	Flavonoids	Flavonols	20196-89-8	B	2987.3	2352.1	2477.6	3812.2	3849.4	4623.2	1.34719	1.57155	0.652187	insig	0.0127825
pmb0736	C23H24O12	Tricin-7-O-Glucoside*	Flavonoids	Flavonoid	-	B	4664	3433.3	9782.9	9675.7	9083.5	9188	0.983655	1.56303	0.644341	insig	0.225684
Lmyp004963	C27H30O14	Apigenin-6-C-(2''-rhamnosyl)glucoside	Flavonoids	Flavonoid	3563-98-2	A	5791900	8798700	6415700	11544000	12091000	8852000	1.21863	1.54654	0.62904	insig	0.0482519
Lmyp004081	C27H30O14	Isovitexin-2''-O-rhamnoside	Flavonoids	Flavonoid	25694-72-8	A	4058400	6069100	4629300	8572500	7532300	6608800	1.26432	1.5392	0.622176	insig	0.0324949
mws0355	C22H18O10	Catechin gallate*	Flavonoids	Flavonoid carbonoside	4261-42-1	A	2215200	4904600	3138400	5215500	5208800	5327000	1.05731	1.53548	0.618693	insig	0.145738
Lmjp003655	C22H22O11	6-C-MethylKaempferol-3-glucoside*	Flavonoids	Flavonoid	31712-49-9	B	212900	231350	283220	373460	414810	325190	1.32852	1.53059	0.61409	insig	0.0196644
pma2088	C27H30O17	Quercetin-3,4'-O-di-glucoside	Flavonoids	Flavonoid	-	B	9770.7	16648	16158	19727	22262	22287	1.13113	1.50965	0.594216	insig	0.0675725
Lmdp004892	C24H22O14	Kaempferol-3-O-(6''-malonyl)galactoside*	Flavonoids	Flavonoid carbonoside	-	A	5851900	7482600	5261900	7877500	10235000	9865500	1.21771	1.50448	0.589269	insig	0.0345054
mws1066	C27H32O14	Naringenin-7-O-Rutinoside(Narirutin)*	Flavonoids	Flavonols	17297-56-2	B	77940	113310	78856	159620	125990	120590	1.21742	1.50385	0.588665	insig	0.0548381
pmp000236	C26H28O14	Isovitexin-8-O-xylcoside	Flavonoids	Flavonoid carbonoside	-	B	44130	46466	38308	47120	75906	69864	1.10506	1.49638	0.581481	insig	0.126813
pmb3041	C23H22O14	Tricin-7-O-saccharic acid	Flavonoids	Flavonoid carbonoside	-	A	3131700	4333800	3127300	4466400	5420400	5675800	1.19814	1.46917	0.554999	insig	0.0387096
mws0046	C27H32O14	Naringenin-7-O-Neohesperidoside(Naringin)*	Flavonoids	Flavonoid carbonoside	-	A	3196600	5828600	4232600	7320600	6546100	5574700	1.09309	1.46641	0.552291	insig	0.0982642
Lmmp003091	C27H30O16	Quercetin-3-O-(4''-O-glucosyl)rhamnoside	Flavonoids	Flavonoid	-	B	8643.4	17767	14123	12763	22507	23275	0.755686	1.44436	0.530435	insig	0.238834
Lmnp002584	C28H32O16	Hispidulin-8-C-(2''-O-glucosyl)glucoside	Flavonoids	Flavonoid	-	B	101640	103030	110690	155490	150930	144680	1.46327	1.43043	0.516448	insig	0.000451733
Lmtp002942	C25H26O13	Apigenin-6,8-di-C-arabinoside*	Flavonoids	Isoflavones	-	A	7343700	10014000	7094700	9996200	11924000	13019000	1.15436	1.42887	0.514871	insig	0.0532626
pmp000581	C23H22O11	Apigenin-7-O-(6''-acetyl)glucoside	Flavonoids	Dihydroflavonol	-	A	40188	52243	36931	65468	64661	52907	1.2251	1.41491	0.500714	insig	0.0452888
Lmpp003930	C30H26O12	Apigenin-7-O-(6''-p-Coumaryl)glucoside	Flavonoids	Dihydroflavone	14259-46-2	B	5665.6	10642	8821.1	14931	14169	5917	0.605675	1.39351	0.478719	insig	0.383886
Lmmp003817	C24H22O14	Kaempferol-3-O-(6''-malonyl)glucoside*	Flavonoids	Flavonoid carbonoside	-	A	8938600	10139000	7262800	11498000	12479000	12640000	1.25185	1.39015	0.475236	insig	0.0387625
pmb3042	C23H24O12	Tricin-5-O-Glucoside	Flavonoids	Flavanols	-	B	67314	120990	85832	113590	149730	109870	0.941134	1.36133	0.445019	insig	0.181184
Lmyn001269	C27H30O16	Kaempferol-3-O-sophoroside	Flavonoids	Flavonoid	-	B	6390.7	4201	5087.5	5575.7	6455.4	9208.3	0.859176	1.35462	0.437891	insig	0.233452
pmb0681	C20H18O9	Apigenin-8-C-Arabinoside	Flavonoids	Isoflavones	66026-80-0	A	410770	724230	516490	707010	895480	595160	0.884548	1.33071	0.412193	insig	0.225501
Lmhp206353	C23H24O12	Tricin-4'-O-glucoside	Flavonoids	Flavonoid	86546-87-4	A	15417	24378	21113	25508	30719	24070	1.00916	1.31833	0.398714	insig	0.126894
pmb3006	C21H20O10	Apigenin-7-O-glucoside(Cosmosiin)	Flavonoids	Flavonols	1178-24-1	B	1145.4	1208.1	1002.7	1827.7	1367.4	1079.4	0.898075	1.27361	0.348927	insig	0.293253
pmb3000	C24H24O12	Chrysoeriol-7-O-(6''-acetyl)glucoside	Flavonoids	Flavonols	-	B	20341	24116	21002	21308	33840	26815	0.838547	1.25213	0.324381	insig	0.265132
mws1397	C22H18O10	Epicatechin gallate*	Flavonoids	Flavonols	480-10-4	A	43032	129370	63044	72440	111110	107890	0.546429	1.23782	0.307803	insig	0.566263
Lmtp002822	C25H26O13	Apigenin-6-C-arabinoside-8-C-xyloside*	Flavonoids	Flavonoid carbonoside	-	B	1374600	1416000	1315600	1734100	1662000	1663400	1.44454	1.23216	0.301191	insig	0.00127472
Hmcn002875	C15H10O7	6-Hydroxyluteolin	Flavonoids	Flavanols	970-74-1	B	9958.7	8983.4	8596	11363	10898	11605	1.3454	1.22979	0.298409	insig	0.0192337
HJN090	C21H22O10	Butin-7-O-glucoside*	Flavonoids	Flavonols	23627-87-4	A	14230	23373	16509	15484	23846	26444	0.527557	1.21552	0.281569	insig	0.418618
Lmnp102580	C26H28O14	Apigenin-6-C-(2''-xylosyl)glucoside*	Flavonoids	Flavonoid carbonoside	-	A	18033000	19736000	17646000	22773000	23050000	21522000	1.37676	1.21528	0.281294	insig	0.00939672
HJN041	C21H24O11	Epicatechin glucoside	Flavonoids	Flavonoid	-	A	1497100	1814700	1315900	1851700	1869800	1892900	1.07367	1.21322	0.278837	insig	0.151814
Lmnp002616	C29H34O17	Cirsiliol-8-C-(2''-glucosyl)glucoside	Flavonoids	Flavonoid	-	A	75129	103290	73338	96145	98499	110380	0.930763	1.21158	0.276891	insig	0.2009
pmb3023	C21H22O11	Eriodictyol-8-C-glucoside	Flavonoids	Flavonoid	-	A	1536500	1845800	1315300	1841200	1757000	2059600	0.957186	1.2044	0.268317	insig	0.163996
HJN087	C21H22O10	Naringenin-4'-O-glucoside*	Flavonoids	Flavonoid	5373-11-5	A	89348	168560	136740	156260	176740	132410	0.632658	1.1793	0.237936	insig	0.433964
pmp001080	C28H32O15	Diosmetin-7-O-Neohesperidoside (Neodiosmin)	Flavonoids	Flavonoid	19895-95-5	A	5909.7	8099.2	8126	9307.2	9477.4	7270.4	0.803326	1.1771	0.235237	insig	0.269776
Zmhp003514	C16H12O6	6,7,8-Tetrahydroxy-5-methoxyflavone	Flavonoids	Flavonols	117-39-5	A	371580	344520	276540	429740	324410	370750	0.714136	1.13324	0.180454	insig	0.34902
mws0089	C21H20O11	Kaempferol-7-O-glucoside*	Flavonoids	Dihydroflavone	1023271-51-3	B	12092	118230	42653	67007	56527	68771	0.492391	1.11175	0.152833	insig	0.85759
HJAP011	C22H22O11	Chrysoeriol-8-C-glucoside (Scoparin)	Flavonoids	Flavonols	491-50-9	B	10612	27381	11767	18928	16573	18924	0.414567	1.09375	0.129283	insig	0.80176
pmb2979	C25H26O14	Hesperetin-7-O-(6''-malonyl)glucoside	Flavonoids	Flavonoid carbonoside	64820-99-1	A	5271100	5710600	5530200	6681700	5552600	5393300	0.648713	1.06757	0.0943299	insig	0.460586
Hmcp001579	C29H34O18	Limocitrin-3-O-sophoroside	Flavonoids	Flavonoid carbonoside	-	B	9412.2	10990	12015	10894	10556	13073	0.407969	1.06496	0.0907984	insig	0.555825
pmp000241	C27H28O17	Luteolin-6-C-(2''-glucuronyl)glucoside	Flavonoids	Flavonoid	-	B	1219400	1772900	2306200	1954600	1622900	2020500	0.296353	1.05653	0.0793275	insig	0.789096
pmb0665	C27H30O16	Orientin-7-O-glucoside	Flavonoids	Flavonoid carbonoside	-	B	27620	26486	29826	26509	32006	27614	0.248458	1.02618	0.0372781	insig	0.729859
HJAP024	C27H30O16	Kaempferol-6,8-di-C-glucoside	Flavonoids	Flavonoid	-	B	66990	65411	59909	74458	69896	52077	0.144005	1.02143	0.0305888	insig	0.862901
pmn001583	C27H30O16	Quercetin-3-O-robinobioside	Flavonoids	Flavonols	29125-80-2	B	13993	13385	9953.7	13454	14172	10333	0.13816	1.0168	0.0240408	insig	0.909297
pmb0711	C27H30O16	Quercetin-7-O-rutinoside	Flavonoids	Flavonoid	-	B	50683	85299	41836	54121	62820	62149	0.147276	1.00715	0.0102834	insig	0.977676
pmb0579	C33H32O15	Chrysoeriol-7-O-(6''-sinapoyl)glucoside	Flavonoids	Flavonoid carbonoside	-	B	204840	374580	223140	265010	249540	283450	0.0923945	0.994318	-0.00822051	insig	0.980206
Hmcp002207	C22H22O12	Isorhamnetin-7-O-glucoside (Brassicin)*	Flavonoids	Flavonoid	32769-00-9	A	60994	49764	45636	42002	67983	43238	0.156921	0.979724	-0.0295523	insig	0.919323
Lmcp005645	C17H14O7	Quercetin-3,4'-Dimethyl Ether	Flavonoids	Flavonoid	1168-42-9	B	3835	3864.3	3930.9	4659.1	3625.1	2993.2	0.185869	0.969665	-0.0444414	insig	0.831341
mws0091	C21H20O12	Quercetin-3-O-glucoside (Isoquercitrin)	Flavonoids	Flavonols	6743-96-0	B	35516	64362	24370	42976	28774	44896	0.0166115	0.938816	-0.0910858	insig	0.858679
Lmfn001584	C21H22O14	Methyl 4,6-di-O-galloyl-D-glucoside	Flavonoids	Flavonoid	-	B	2795000	2342700	1278500	1883200	1897700	2227700	0.066759	0.936473	-0.0946902	insig	0.794228
mws0914	C15H12O5	Pinobanksin*	Flavonoids	Flavanols	-	B	4760900	4749400	5399100	4295400	4715900	4839400	0.853185	0.928991	-0.106263	insig	0.266429
Lmnp002413	C27H30O15	Luteolin-6-C-rhamnoside-7-O-glucoside	Flavonoids	Flavonoid carbonoside	29428-58-8	B	46221	48767	31281	32631	43734	40388	0.328658	0.924637	-0.113041	insig	0.649903
Lmfp001509	C13H16O9	1-O-Galloyl-rhamnose	Flavonoids	Dihydroflavone	-	B	16716	12432	11913	12131	11194	14633	0.418381	0.92443	-0.113365	insig	0.607168
Lmhn002727	C37H29O16	(EC→EC)g(1)	Flavonoids	Flavonoid carbonoside	-	B	49140	18398	17388	32354	19144	26482	0.0515729	0.918211	-0.123102	insig	0.850388
pme0376	C15H12O5	Naringenin (5,7,4'-Trihydroxyflavanone)*	Flavonoids	Flavonoid	-	B	6522.3	7422.7	5946.6	4300.6	6107.5	7637.3	0.54868	0.907187	-0.140528	insig	0.604059
Hmmp002447	C33H40O18	Apigenin-7-O-rutinoside-4'-O-rhamnoside	Flavonoids	Flavonoid	-	B	2996.8	4859	4089.1	4058.2	3164.2	3506.9	0.407995	0.898233	-0.154839	insig	0.54951
Hmcn001884	C21H20O12	6-Hydroxyluteolin 5-glucoside	Flavonoids	Flavonols	5041-82-7	B	43608	56336	20248	34267	28980	42188	0.150691	0.877221	-0.188987	insig	0.696468
Lmnp002741	C27H30O14	Genkwanin-6-C-(2''-O-apiosyl)glucoside	Flavonoids	Flavonoid carbonoside	20310-89-8	A	745210	661760	524090	570070	543330	575200	0.752201	0.874442	-0.193565	insig	0.336152
Li512111	C24H24O13	Isorhamnetin-3-O-(6''-acetylglucoside)	Flavonoids	Flavonols	-	B	6511.1	6478.4	4700.1	4806.4	4488.7	6016.8	0.704692	0.865588	-0.208248	insig	0.358104
mws2220	C22H18O11	Gallocatechin 3-O-gallate	Flavonoids	Flavonols	482-36-0	B	21483	22606	14929	13559	24371	13022	0.499166	0.86333	-0.212016	insig	0.57968
Lmlp006175	C21H22O10	Isosalipurposide (Phlorizin Chalcone)	Flavonoids	Flavonoid	-	A	127360	211120	161630	122010	142390	166080	0.601423	0.860771	-0.216299	insig	0.459457
Cmsp006026	C16H14O7	Dihydrorhamnetin	Flavonoids	Chalcones	-	A	2051700	2309300	3796400	2508400	2308200	2161900	0.423918	0.855481	-0.225192	insig	0.546849
mws0913	C21H20O11	Kaempferol-3-O-galactoside (Trifolin)*	Flavonoids	Flavanols	-	B	28264	16092	25147	16014	21825	20780	0.548346	0.843402	-0.245707	insig	0.439775
pma0791	C24H24O13	Naringenin-7-O-(6''-malonyl)glucoside	Flavonoids	Dihydroflavonol	-	B	1574700	655310	838090	817710	821070	902260	0.320485	0.828213	-0.271926	insig	0.596223
pmp000120	C22H22O11	Diosmetin-6-C-glucoside	Flavonoids	Flavonols	482-35-9	A	19420	16528	12339	8222.4	14794	15493	0.724941	0.797511	-0.326424	insig	0.352705
mws0059	C27H30O16	Quercetin-3-O-rutinoside (Rutin)	Flavonoids	Flavonoid	-	B	84717	57998	49796	51195	40635	60966	0.73217	0.7937	-0.333334	insig	0.349727
Lmzp002365	C22H24O11	Hesperetin-7-O-glucoside	Flavonoids	Flavonols	27875-34-9	B	9	17058	39928	9	20786	21830	0.0853698	0.747873	-0.419136	insig	0.745385
mws0061	C21H20O12	Quercetin-3-O-galactoside (Hyperin)	Flavonoids	Flavonols	-	B	51637	50663	34853	24741	37788	38083	0.979504	0.733575	-0.446984	insig	0.159763
Lmjp002906	C22H22O12	Rhamnetin-3-O-Glucoside*	Flavonoids	Flavonoid	39986-90-8	B	29279	43087	33942	24636	21261	31466	1.07624	0.727725	-0.458535	insig	0.134463
pmn001642	C23H20O13	Kaempferol-3-O-(2''-O-acetyl)glucuronide	Flavonoids	Flavonols	-	B	11348	21111	22851	9	16920	23039	0.702552	0.722618	-0.468695	insig	0.556942
pmb3045	C23H22O13	Tricin-7-O-Glucuronide	Flavonoids	Flavonoid carbonoside	-	B	25580	35583	18051	16652	8891.6	30628	0.726493	0.709112	-0.495915	insig	0.401144
mws0044	C15H12O7	Dihydroquercetin(Taxifolin)	Flavonoids	Flavonols	-	B	2453.2	2778	3005.7	1806.8	1777.3	2111.3	1.37629	0.691449	-0.532304	insig	0.0158773
pmp000191	C23H22O11	6''-O-Acetylgenistin	Flavonoids	Isoflavones	-	B	52910	58920	44370	22137	29402	55947	0.971242	0.688131	-0.539246	insig	0.251092
pmp001106	C27H30O15	Vitexin-2''-O-glucoside	Flavonoids	Flavonols	52525-35-6	A	60598	97931	161440	70609	71700	70205	0.750384	0.664171	-0.590374	insig	0.347767
Lmjp003044	C22H22O12	Isorhamnetin-3-O-Glucoside*	Flavonoids	Flavonoid	32769-01-0	B	54579	60465	38415	35825	36858	29218	1.14679	0.664028	-0.590685	insig	0.107917
Lmyp004444	C22H22O12	Tricin-4'-methylether-3'-O-glucoside*	Flavonoids	Flavonoid	-	B	64951	64217	52689	37953	37774	43778	1.38974	0.657137	-0.605733	insig	0.0193329
mws1360	C21H22O10	Engeletin	Flavonoids	Flavanols	1257-08-5	B	5389.3	4516.8	4526.6	2559.9	4808.4	1764.7	0.968769	0.632799	-0.66018	insig	0.184423
pme1665	C27H30O15	Isovitexin-7-O-glucoside(Saponarin)	Flavonoids	Flavonoid	38665-01-9	B	1001700	1143700	782600	433450	648710	752790	1.1855	0.626691	-0.674175	insig	0.0617645
pmp000126	C27H30O16	Luteolin-6,8-di-C-glucoside	Flavonoids	Flavonoid carbonoside	-	B	99581	89150	55148	53840	59395	38362	1.03371	0.621607	-0.685924	insig	0.134621
mws0034	C22H18O11	Epigallocatechin-3-gallate	Flavonoids	Flavonoid	-	B	93654	56755	79236	45182	33347	63719	1.0822	0.619426	-0.690997	insig	0.106811
pme1605	C27H30O15	Kaempferol-3-O-robinobioside(Biorobin)	Flavonoids	Flavonols	153-18-4	A	55543	62344	123300	47747	44939	50421	1.00031	0.593345	-0.753058	insig	0.268036
mws1329	C21H20O12	Quercetin-7-O-glucoside	Flavonoids	Flavonoid	27542-39-8	B	16413	29980	14956	9	19703	14240	0.753186	0.553424	-0.853543	insig	0.296767
mws0042	C15H14O7	Epigallocatechin	Flavonoids	Flavonols	33429-83-3	B	8930	17148	20548	8995.6	10540	4812	0.976686	0.522189	-0.937355	insig	0.151557
pmp001079	C27H30O15	Luteolin-7-O-neohesperidoside*	Flavonoids	Flavonols	147714-62-3	B	42866	39043	68021	27167	20198	30529	1.23969	0.519536	-0.944705	insig	0.106526
pme0309	C8H8O5	3-O-Methylgallic Acid	Flavonoids	Dihydroflavonol	548-82-3	A	2946.2	57615	2440.4	12162	9821.3	9383.9	0.227925	0.497879	-1.00613	insig	0.622942
pmp000585	C24H22O13	Apigenin-7-O-(6''-malonyl)glucoside	Flavonoids	Flavonoid carbonoside	-	B	16103	53870	34660	9	21607	23323	0.784638	0.429492	-1.2193	insig	0.215937
mws0024	C7H6O5	Gallic acid	Flavonoids	Dihydroflavone	480-41-1	A	3517.4	64619	2861.1	12363	8883.6	9065.7	0.0968069	0.426949	-1.22786	insig	0.57607

## Sheet: TableS5
TableS5. Mutant SNP sites in the candidate interval (24.16 Mb to 35.90 Mb).
# Dominace Parent	'Dominace bulk	Recessive bulk	'Recessive Parent		# Chr	'Pos	'Ref	'Alt	'Qual	'DP	'AF1	'DP4	Annotation
'25509139	'G	'A	'5'UTR	'Bhi12M000728	'chr12	'25509072	'25511418	'8.429950	'1.485931	'0.834729	'83.866417	'2.714725	'IPR003406 Glycosyl transferase, family 14
'25562277	'C	'C	'Intron	'Bhi12M000729	'chr12	'25560261	'25564874	'6.947502	'19.703655	'14.716119	'15.873219	'14.080583	'IPR023395 Mitochondrial carrier domain; IPR002067 Mitochondrial carrier protein; IPR018108 Mitochondrial substrate/solute carrier
'25636015	'G	'A	'Intron	'Bhi12M000733	'chr12	'25634472	'25645859	'12.891372	'18.969261	'31.283072	'22.421364	'27.193729	'IPR007379 Tim44-like domain; IPR032710 NTF2-like domain
'25636559	'G	'G	'Intron	'Bhi12M000733	'chr12	'25634472	'25645859	'12.891372	'18.969261	'31.283072	'22.421364	'27.193729	'IPR007379 Tim44-like domain; IPR032710 NTF2-like domain
'25638345	'G	'A	'Intron	'Bhi12M000733	'chr12	'25634472	'25645859	'12.891372	'18.969261	'31.283072	'22.421364	'27.193729	'IPR007379 Tim44-like domain; IPR032710 NTF2-like domain
'25638350	'G	'A	'Intron	'Bhi12M000733	'chr12	'25634472	'25645859	'12.891372	'18.969261	'31.283072	'22.421364	'27.193729	'IPR007379 Tim44-like domain; IPR032710 NTF2-like domain
'25638770	'G	'A	'Intron	'Bhi12M000733	'chr12	'25634472	'25645859	'12.891372	'18.969261	'31.283072	'22.421364	'27.193729	'IPR007379 Tim44-like domain; IPR032710 NTF2-like domain
'25639948	'C	'T	'Intron	'Bhi12M000733	'chr12	'25634472	'25645859	'12.891372	'18.969261	'31.283072	'22.421364	'27.193729	'IPR007379 Tim44-like domain; IPR032710 NTF2-like domain
'25641596	'C	'C	'Intron	'Bhi12M000733	'chr12	'25634472	'25645859	'12.891372	'18.969261	'31.283072	'22.421364	'27.193729	'IPR007379 Tim44-like domain; IPR032710 NTF2-like domain
'25641803	'G	'G	'Intron	'Bhi12M000733	'chr12	'25634472	'25645859	'12.891372	'18.969261	'31.283072	'22.421364	'27.193729	'IPR007379 Tim44-like domain; IPR032710 NTF2-like domain
'25641823	'G	'G	'Intron	'Bhi12M000733	'chr12	'25634472	'25645859	'12.891372	'18.969261	'31.283072	'22.421364	'27.193729	'IPR007379 Tim44-like domain; IPR032710 NTF2-like domain
'25641853	'C	'C	'Intron	'Bhi12M000733	'chr12	'25634472	'25645859	'12.891372	'18.969261	'31.283072	'22.421364	'27.193729	'IPR007379 Tim44-like domain; IPR032710 NTF2-like domain
'25643614	'C	'C	'Intron	'Bhi12M000733	'chr12	'25634472	'25645859	'12.891372	'18.969261	'31.283072	'22.421364	'27.193729	'IPR007379 Tim44-like domain; IPR032710 NTF2-like domain
'25645288	'G	'A	'Intron	'Bhi12M000733	'chr12	'25634472	'25645859	'12.891372	'18.969261	'31.283072	'22.421364	'27.193729	'IPR007379 Tim44-like domain; IPR032710 NTF2-like domain
'25645308	'G	'A	'Intron	'Bhi12M000733	'chr12	'25634472	'25645859	'12.891372	'18.969261	'31.283072	'22.421364	'27.193729	'IPR007379 Tim44-like domain; IPR032710 NTF2-like domain
'25645342	'C	'T	'Intron	'Bhi12M000733	'chr12	'25634472	'25645859	'12.891372	'18.969261	'31.283072	'22.421364	'27.193729	'IPR007379 Tim44-like domain; IPR032710 NTF2-like domain
'25645415	'C	'C	'Intron	'Bhi12M000733	'chr12	'25634472	'25645859	'12.891372	'18.969261	'31.283072	'22.421364	'27.193729	'IPR007379 Tim44-like domain; IPR032710 NTF2-like domain
'25707164	'G	'A	'3'UTR	'Bhi12M000738	'chr12	'25706993	'25714647	'14.158827	'34.752930	'19.905622	'19.056305	'15.803283	'IPR004821 Cytidyltransferase-like domain; IPR014729 Rossmann-like alpha/beta/alpha sandwich fold
'25877875	'GCA:A	'ACA:T	'CDS_nonsyn	'Bhi12M000742	'chr12	'25876086	'25881516	'0.296029	'18.007511	'13.995933	'1.490588	'4.835029	IPR001789 Signal transduction response regulator, receiver domain; IPR006447 Myb domain, plants; IPR011006 CheY-like superfamily; IPR009057 Homeodomain-like
'25880761	'C	'T	'Intron	'Bhi12M000742	'chr12	'25876086	'25881516	'0.296029	'18.007511	'13.995933	'1.490588	'4.835029	'IPR001789 Signal transduction response regulator, receiver domain; IPR006447 Myb domain, plants; IPR011006 CheY-like superfamily; IPR009057 Homeodomain-like
'28055795	'C	'C	'Intron	'Bhi12M000805	'chr12	'28047423	'28099780	'6.432194	'28.460159	'14.769380	'14.152170	'18.566149	'IPR021629 Mediator complex, subunit Med23
'28515082	'C	'C	'5'UTR	'Bhi12M000821	'chr12	'28514883	'28520079	'12.170997	'30.835745	'6.316378	'22.910810	'14.286502	'IPR020683 Ankyrin repeat-containing domain; IPR026961 PGG domain; IPR002110 Ankyrin repeat
'28527282	'G	'G	'Intron	'Bhi12M000822	'chr12	'28526781	'28531753	'11.066455	'25.665556	'8.725101	'12.005707	'11.839266	'-
'29462938	'C	'C	'Intron	'Bhi12M000847	'chr12	'29460286	'29464429	'39.440990	'33.105663	'28.615545	'97.530640	'22.853214	'IPR004082 Protein OBERON; IPR032881 Oberon, PHD finger domain; IPR032535 Oberon, coiled-coil region
'30577665	'C	'T	'Intron	'Bhi12M000879	'chr12	'30565398	'30589444	'1.610859	'11.321371	'12.811221	'4.087990	'6.475132	'IPR003008 Tubulin/FtsZ, GTPase domain; IPR003409 MORN motif
'31769114	'C	'T	'Intron	'Bhi12M000916	'chr12	'31764338	'31771969	'9.066117	'33.593349	'229.726898	'21.250217	'82.766045	'IPR001404 Heat shock protein Hsp90 family; IPR019805 Heat shock protein Hsp90, conserved site; IPR003594 Histidine kinase-like ATPase, C-terminal domain; IPR020575 Heat shock protein Hsp90, N-terminal; IPR020568 Ribosomal protein S5 domain 2-type fold

## Sheet: TableS6
TableS6. The annotations of differentially expressed genes (DEG) and cluster colors in co-expression network.
geneID	Mergedcolors	Chr	function.IPR	GO	NR	Ara	Swissprot.	TOMvalue
Bhi12G000742	brown	chr12	IPR001789 Signal transduction response regulator, receiver domain; IPR006447 Myb domain, plants; IPR011006 CheY-like superfamily; IPR009057 Homeodomain-like	GO:0000160 phosphorelay signal transduction system;	gi|778704119|ref|XP_011655480.1| PREDICTED: uncharacterized protein LOC101203501 isoform X4 [Cucumis sativus]	AT1G68210.1 | Symbols: APRR6, PRR6 | pseudo-response regulator 6 | chr1:25565983-25569302 FORWARD LENGTH=755	sp|Q9C9F6|APRR6_ARATH Putative two-component response regulator-like APRR6 OS=Arabidopsis thaliana GN=APRR6 PE=3 SV=2	1
Bhi10G001402	green	chr10	IPR003489 Ribosomal protein S30Ae/sigma 54 modulation protein; IPR032528 Sigma 54 modulation/S30EA ribosomal protein, C-terminal	GO:0044238 primary metabolic process;	gi|449459188|ref|XP_004147328.1| PREDICTED: ribosome-binding factor PSRP1, chloroplastic [Cucumis sativus]	AT5G24490.1 | Symbols: | 30S ribosomal protein, putative | chr5:8365690-8367178 FORWARD LENGTH=308	sp|P19954|PRSP1_SPIOL Ribosome-binding factor PSRP1, chloroplastic OS=Spinacia oleracea GN=PSRP1 PE=1 SV=2	0.533219
Bhi06G000135	red	chr6	-	-	-	-	-	0.524373
Bhi09G001849	yellow	chr9	-	-	gi|659133083|ref|XP_008466545.1| PREDICTED: uncharacterized protein LOC103503930 [Cucumis melo]	AT1G19530.1 | Symbols: | unknown protein; FUNCTIONS IN: molecular_function unknown; INVOLVED IN: N-terminal protein myristoylation, anaerobic respiration; LOCATED IN: cellular_component unknown; EXPRESSED IN: leaf apex, inflorescence meristem, hypocotyl, root, flower; EXPRESSED DURING: petal differentiation and expansion stage; Has 47 Blast hits to 47 proteins in 13 species: Archae - 0; Bacteria …	-	0.520615
Bhi05G000810	brown	chr5	IPR000270 PB1 domain	GO:0005515 protein binding;	gi|449438272|ref|XP_004136913.1| PREDICTED: protein transport protein sec31 [Cucumis sativus] >gi|700188577|gb|KGN43810.1| hypothetical protein Csa_7G068630 [Cucumis sativus]	AT5G64430.1 | Symbols: | Octicosapeptide/Phox/Bem1p family protein | chr5:25762540-25764081 REVERSE LENGTH=513	-	0.520466
Bhi06G000425	black	chr6	IPR011032 GroES-like; IPR020843 Polyketide synthase, enoylreductase domain; IPR016040 NAD(P)-binding domain; IPR002085 Alcohol dehydrogenase superfamily, zinc-type; IPR013154 Alcohol dehydrogenase, N-terminal	-	gi|659117723|ref|XP_008458755.1| PREDICTED: 2-methylene-furan-3-one reductase-like [Cucumis melo]	AT1G23740.1 | Symbols: | Oxidoreductase, zinc-binding dehydrogenase family protein | chr1:8398245-8399656 REVERSE LENGTH=386	sp|Q84V25|ENOXE_FRAAN 2-methylene-furan-3-one reductase OS=Fragaria ananassa GN=EO PE=1 SV=1	0.519868
Bhi04G000169	turquoise	chr4	-	-	gi|778674345|ref|XP_011650191.1| PREDICTED: uncharacterized protein LOC105434756 [Cucumis sativus] >gi|700207500|gb|KGN62619.1| hypothetical protein Csa_2G361830 [Cucumis sativus]	-	-	0.519737
Bhi09G002071	turquoise	chr9	IPR002213 UDP-glucuronosyl/UDP-glucosyltransferase	GO:0008152 metabolic process; GO:0016758 transferase activity, transferring hexosyl groups;	gi|449437008|ref|XP_004136284.1| PREDICTED: 7-deoxyloganetin glucosyltransferase [Cucumis sativus] >gi|700205087|gb|KGN60220.1| hypothetical protein Csa_3G889760 [Cucumis sativus]	AT1G22360.1 | Symbols: AtUGT85A2, UGT85A2 | UDP-glucosyl transferase 85A2 | chr1:7895068-7897527 REVERSE LENGTH=481	sp|F8WKW1|UGT2_GARJA 7-deoxyloganetin glucosyltransferase OS=Gardenia jasminoides GN=UGT85A24 PE=1 SV=1	0.518177
Bhi02G000326	brown	chr2	IPR023214 HAD-like domain; IPR006379 HAD-superfamily hydrolase, subfamily IIB; IPR003337 Trehalose-phosphatase; IPR001830 Glycosyl transferase, family 20	-	gi|449440688|ref|XP_004138116.1| PREDICTED: probable alpha,alpha-trehalose-phosphate synthase [UDP-forming] 10 [Cucumis sativus] >gi|700208499|gb|KGN63595.1| hypothetical protein Csa_1G005560 [Cucumis sativus]	AT1G60140.1 | Symbols: ATTPS10, TPS10 | trehalose phosphate synthase | chr1:22177246-22180073 REVERSE LENGTH=861	sp|O80738|TPS10_ARATH Probable alpha,alpha-trehalose-phosphate synthase [UDP-forming] 10 OS=Arabidopsis thaliana GN=TPS10 PE=2 SV=1	0.514151
Bhi11G001950	turquoise	chr11	IPR001810 F-box domain	GO:0005515 protein binding; GO:0004252 serine-type endopeptidase activity;	gi|449462992|ref|XP_004149218.1| PREDICTED: probable F-box protein At1g60180 [Cucumis sativus] >gi|700204027|gb|KGN59160.1| hypothetical protein Csa_3G777680 [Cucumis sativus]	AT2G36090.1 | Symbols: | F-box family protein | chr2:15158631-15159584 FORWARD LENGTH=317	sp|Q9SIH5|FB322_ARATH Probable F-box protein At1g60180 OS=Arabidopsis thaliana GN=At2g36090 PE=2 SV=1	0.512783
Bhi08G000027	red	chr8	-	-	gi|449443462|ref|XP_004139496.1| PREDICTED: uncharacterized protein LOC101208386 [Cucumis sativus] >gi|700209856|gb|KGN64952.1| hypothetical protein Csa_1G166810 [Cucumis sativus]	AT5G22340.1 | Symbols: | unknown protein; FUNCTIONS IN: molecular_function unknown; INVOLVED IN: biological_process unknown; LOCATED IN: chloroplast; EXPRESSED IN: 22 plant structures; EXPRESSED DURING: 13 growth stages; Has 58 Blast hits to 58 proteins in 20 species: Archae - 0; Bacteria - 0; Metazoa - 0; Fungi - 0; Plants - 57; Viruses - 0; Other Eukaryotes - 1 (source: NCBI BLink). | chr5:7394…	-	0.512436
Bhi10G000227	yellow	chr10	-	-	gi|659097587|ref|XP_008449706.1| PREDICTED: uncharacterized protein LOC103491505 [Cucumis melo]	AT2G01870.1 | Symbols: | unknown protein; FUNCTIONS IN: molecular_function unknown; INVOLVED IN: biological_process unknown; LOCATED IN: chloroplast thylakoid membrane, chloroplast; EXPRESSED IN: 22 plant structures; EXPRESSED DURING: 13 growth stages; Has 11 Blast hits to 11 proteins in 5 species: Archae - 0; Bacteria - 0; Metazoa - 0; Fungi - 0; Plants - 11; Viruses - 0; Other Eukaryotes - 0 (s…	-	0.509692
Bhi06G000136	green	chr6	-	-	gi|937927964|dbj|BAT02881.1| Os07g0643500, partial [Oryza sativa Japonica Group]	-	-	0.508638
Bhi03G000738	red	chr3	IPR002213 UDP-glucuronosyl/UDP-glucosyltransferase	GO:0008152 metabolic process; GO:0016758 transferase activity, transferring hexosyl groups; GO:0008428 ribonuclease inhibitor activity; GO:0051252 regulation of RNA metabolic process; GO:0003919 FMN adenylyltransferase activity;	gi|659130645|ref|XP_008465275.1| PREDICTED: UDP-glycosyltransferase 87A1-like [Cucumis melo]	AT2G30140.2 | Symbols: | UDP-Glycosyltransferase superfamily protein | chr2:12872200-12873691 FORWARD LENGTH=454	sp|O64733|U87A2_ARATH UDP-glycosyltransferase 87A2 OS=Arabidopsis thaliana GN=UGT87A2 PE=1 SV=1	0.50841
Bhi10G000110	blue	chr10	IPR000757 Glycoside hydrolase, family 16; IPR010713 Xyloglucan endo-transglycosylase, C-terminal; IPR016455 Xyloglucan endotransglucosylase/hydrolase; IPR013320 Concanavalin A-like lectin/glucanase domain	GO:0004553 hydrolase activity, hydrolyzing O-glycosyl compounds; GO:0005975 carbohydrate metabolic process;	gi|659130881|ref|XP_008465400.1| PREDICTED: xyloglucan endotransglucosylase/hydrolase protein 31-like [Cucumis melo]	AT2G36870.1 | Symbols: XTH32 | xyloglucan endotransglucosylase/hydrolase 32 | chr2:15472869-15474630 REVERSE LENGTH=299	sp|Q9SJL9|XTH32_ARATH Probable xyloglucan endotransglucosylase/hydrolase protein 32 OS=Arabidopsis thaliana GN=XTH32 PE=2 SV=1	0.506208
Bhi12G000791	turquoise	chr12	IPR019654 NAD(P)H-quinone oxidoreductase subunit L	GO:0016655 oxidoreductase activity, acting on NAD(P)H, quinone or similar compound as acceptor; GO:0055114 oxidation-reduction process;	gi|449464794|ref|XP_004150114.1| PREDICTED: NAD(P)H-quinone oxidoreductase subunit L, chloroplastic [Cucumis sativus] >gi|700196310|gb|KGN51487.1| hypothetical protein Csa_5G569340 [Cucumis sativus]	AT1G70760.1 | Symbols: CRR23 | inorganic carbon transport protein-related | chr1:26687267-26688201 FORWARD LENGTH=191	sp|Q9CAC5|NDHL_ARATH NAD(P)H-quinone oxidoreductase subunit L, chloroplastic OS=Arabidopsis thaliana GN=ndhL PE=2 SV=1	0.504983
Bhi12G000967	brown	chr12	IPR002347 Glucose/ribitol dehydrogenase; IPR002198 Short-chain dehydrogenase/reductase SDR; IPR016040 NAD(P)-binding domain	-	gi|659072463|ref|XP_008465699.1| PREDICTED: xanthoxin dehydrogenase [Cucumis melo]	AT1G52340.1 | Symbols: ABA2, SIS4, GIN1, SDR1, ISI4, SRE1, ATABA2, ATSDR1 | NAD(P)-binding Rossmann-fold superfamily protein | chr1:19489997-19491527 REVERSE LENGTH=285	sp|Q9C826|ABA2_ARATH Xanthoxin dehydrogenase OS=Arabidopsis thaliana GN=ABA2 PE=1 SV=1	0.497674
Bhi02G001494	brown	chr2	IPR023329 Chlorophyll a/b binding protein domain; IPR022796 Chlorophyll A-B binding protein; IPR001344 Chlorophyll A-B binding protein, plant	-	gi|659100141|ref|XP_008450947.1| PREDICTED: photosystem I chlorophyll a/b-binding protein 6, chloroplastic [Cucumis melo]	AT1G19150.1 | Symbols: LHCA6, LHCA2*1 | photosystem I light harvesting complex gene 6 | chr1:6612806-6613799 FORWARD LENGTH=270	sp|Q8LCQ4|LHCA6_ARATH Photosystem I chlorophyll a/b-binding protein 6, chloroplastic OS=Arabidopsis thaliana GN=LHCA6 PE=1 SV=1	0.49766
Bhi01G002599	red	chr1	IPR007828 Inositol oxygenase	GO:0005506 iron ion binding; GO:0005737 cytoplasm; GO:0019310 inositol catabolic process; GO:0050113 inositol oxygenase activity; GO:0055114 oxidation-reduction process;	gi|778681250|ref|XP_011651475.1| PREDICTED: inositol oxygenase 1-like isoform X1 [Cucumis sativus] >gi|700202882|gb|KGN58015.1| hypothetical protein Csa_3G434960 [Cucumis sativus]	AT1G14520.2 | Symbols: MIOX1 | myo-inositol oxygenase 1 | chr1:4968376-4969954 REVERSE LENGTH=309	sp|Q8L799|MIOX1_ARATH Inositol oxygenase 1 OS=Arabidopsis thaliana GN=MIOX1 PE=2 SV=1	0.493443
Bhi12G001233	yellow	chr12	IPR007650 Zf-FLZ domain	-	gi|700206286|gb|KGN61405.1| hypothetical protein Csa_2G118280 [Cucumis sativus]	AT5G47060.1 | Symbols: | Protein of unknown function (DUF581) | chr5:19116843-19117639 FORWARD LENGTH=177	-	0.492665
Bhi05G001763	brown	chr5	IPR002123 Phospholipid/glycerol acyltransferase	GO:0008152 metabolic process; GO:0016746 transferase activity, transferring acyl groups;	gi|778716614|ref|XP_011657568.1| PREDICTED: glycerol-3-phosphate acyltransferase 1 [Cucumis sativus]	AT1G06520.1 | Symbols: ATGPAT1, GPAT1 | glycerol-3-phosphate acyltransferase 1 | chr1:1994170-1996067 REVERSE LENGTH=585	sp|Q9SHJ5|GPAT1_ARATH Glycerol-3-phosphate acyltransferase 1 OS=Arabidopsis thaliana GN=GPAT1 PE=1 SV=1	0.491943
Bhi11G000031	black	chr11	IPR001005 SANT/Myb domain; IPR017930 Myb domain; IPR009057 Homeodomain-like; IPR006447 Myb domain, plants	-	gi|659095893|ref|XP_008448819.1| PREDICTED: transcription factor MYB1R1 [Cucumis melo]	AT5G47390.1 | Symbols: | myb-like transcription factor family protein | chr5:19227001-19228546 FORWARD LENGTH=365	sp|Q2V9B0|MY1R1_SOLTU Transcription factor MYB1R1 OS=Solanum tuberosum PE=2 SV=1	0.482221
Bhi02G000477	yellow	chr2	IPR003231 Acyl carrier protein (ACP); IPR009081 Acyl carrier protein-like; IPR020806 Polyketide synthase, phosphopantetheine-binding domain; IPR006162 Phosphopantetheine attachment site	GO:0006633 fatty acid biosynthetic process; GO:0031177 phosphopantetheine binding;	gi|449440504|ref|XP_004138024.1| PREDICTED: acyl carrier protein 4, chloroplastic [Cucumis sativus] >gi|700208347|gb|KGN63443.1| Acyl carrier protein [Cucumis sativus]	AT4G25050.1 | Symbols: ACP4 | acyl carrier protein 4 | chr4:12870178-12871024 FORWARD LENGTH=137	sp|Q9SW21|ACP4_ARATH Acyl carrier protein 4, chloroplastic OS=Arabidopsis thaliana GN=ACP4 PE=2 SV=1	0.481021
Bhi07G001392	yellow	chr7	IPR006626 Parallel beta-helix repeat; IPR000743 Glycoside hydrolase, family 28; IPR011050 Pectin lyase fold/virulence factor; IPR012334 Pectin lyase fold	-	gi|659090777|ref|XP_008446196.1| PREDICTED: probable polygalacturonase At1g80170 [Cucumis melo]	AT1G23460.1 | Symbols: | Pectin lyase-like superfamily protein | chr1:8327382-8329622 FORWARD LENGTH=460	sp|Q94AJ5|PGLR5_ARATH Probable polygalacturonase At1g80170 OS=Arabidopsis thaliana GN=At1g80170 PE=1 SV=1	0.478177
Bhi03G001668	yellow	chr3	IPR003480 Transferase; IPR023213 Chloramphenicol acetyltransferase-like domain	GO:0016747 transferase activity, transferring acyl groups other than amino-acyl groups;	gi|659069316|ref|XP_008449203.1| PREDICTED: BAHD acyltransferase DCR-like [Cucumis melo]	AT5G01210.1 | Symbols: | HXXXD-type acyl-transferase family protein | chr5:84554-85981 FORWARD LENGTH=475	sp|Q9FF86|DCR_ARATH BAHD acyltransferase DCR OS=Arabidopsis thaliana GN=DCR PE=2 SV=1	0.477281
Bhi04G000623	turquoise	chr4	IPR001202 WW domain	GO:0005515 protein binding;	gi|449469873|ref|XP_004152643.1| PREDICTED: uncharacterized protein LOC101203360 [Cucumis sativus] >gi|700207570|gb|KGN62689.1| hypothetical protein Csa_2G368900 [Cucumis sativus]	AT1G78170.1 | Symbols: | unknown protein; BEST Arabidopsis thaliana protein match is: unknown protein (TAIR:AT1G22250.1); Has 66 Blast hits to 66 proteins in 11 species: Archae - 0; Bacteria - 0; Metazoa - 0; Fungi - 0; Plants - 66; Viruses - 0; Other Eukaryotes - 0 (source: NCBI BLink). | chr1:29414160-29414941 FORWARD LENGTH=221	-	0.476756
Bhi01G002335	green	chr1	IPR029044 Nucleotide-diphospho-sugar transferases; IPR005150 Cellulose synthase	-	gi|659102037|ref|XP_008451919.1| PREDICTED: cellulose synthase-like protein G3 [Cucumis melo]	AT4G23990.1 | Symbols: ATCSLG3, CSLG3 | cellulose synthase like G3 | chr4:12456491-12460498 FORWARD LENGTH=751	sp|Q0WVN5|CSLG3_ARATH Cellulose synthase-like protein G3 OS=Arabidopsis thaliana GN=CSLG3 PE=2 SV=2	0.474021
Bhi01G002798	brown	chr1	IPR027417 P-loop containing nucleoside triphosphate hydrolase; IPR011629 Cobalamin (vitamin B12) biosynthesis CobW-like, C-terminal; IPR003495 CobW/HypB/UreG domain	-	gi|659108421|ref|XP_008454190.1| PREDICTED: uncharacterized GTP-binding protein YjiA [Cucumis melo]	AT1G80480.1 | Symbols: PTAC17 | plastid transcriptionally active 17 | chr1:30258272-30260570 REVERSE LENGTH=444	sp|Q8IUF1|CBWD2_HUMAN COBW domain-containing protein 2 OS=Homo sapiens GN=CBWD2 PE=2 SV=1	0.473782
Bhi06G001136	black	chr6	IPR000756 Diacylglycerol kinase, accessory domain; IPR001206 Diacylglycerol kinase, catalytic domain; IPR016961 Diacylglycerol kinase, plant; IPR016064 NAD kinase/diacylglycerol kinase-like domain	GO:0004143 diacylglycerol kinase activity; GO:0007205 protein kinase C-activating G-protein coupled receptor signaling pathway;	gi|659069800|ref|XP_008451852.1| PREDICTED: diacylglycerol kinase 7-like [Cucumis melo]	AT4G30340.1 | Symbols: ATDGK7, DGK7 | diacylglycerol kinase 7 | chr4:14838465-14840941 REVERSE LENGTH=492	sp|F4JQ95|DGK7_ARATH Diacylglycerol kinase 7 OS=Arabidopsis thaliana GN=DGK7 PE=1 SV=1	0.47127
Bhi10G001215	yellow	chr10	IPR023213 Chloramphenicol acetyltransferase-like domain; IPR003480 Transferase	-	gi|449468295|ref|XP_004151857.1| PREDICTED: benzyl alcohol O-benzoyltransferase-like [Cucumis sativus] >gi|700208211|gb|KGN63330.1| hypothetical protein Csa_2G429030 [Cucumis sativus]	AT5G17540.1 | Symbols: | HXXXD-type acyl-transferase family protein | chr5:5782061-5783682 REVERSE LENGTH=461	sp|Q8GT20|BEBT_TOBAC Benzyl alcohol O-benzoyltransferase OS=Nicotiana tabacum GN=HSR201 PE=1 SV=1	0.470291
Bhi05G000029	turquoise	chr5	IPR002213 UDP-glucuronosyl/UDP-glucosyltransferase	GO:0008152 metabolic process; GO:0016758 transferase activity, transferring hexosyl groups;	gi|449453306|ref|XP_004144399.1| PREDICTED: UDP-glycosyltransferase 74F2 [Cucumis sativus] >gi|700203254|gb|KGN58387.1| hypothetical protein Csa_3G635870 [Cucumis sativus]	AT2G43840.2 | Symbols: UGT74F1 | UDP-glycosyltransferase 74 F1 | chr2:18157681-18159166 FORWARD LENGTH=449	sp|Q6VAA6|U74G1_STERE UDP-glycosyltransferase 74G1 OS=Stevia rebaudiana GN=UGT74G1 PE=1 SV=1	0.465932
Bhi05G000271	green	chr5	IPR000889 Glutathione peroxidase; IPR029759 Glutathione peroxidase active site; IPR029760 Glutathione peroxidase conserved site; IPR012336 Thioredoxin-like fold	GO:0004602 glutathione peroxidase activity; GO:0006979 response to oxidative stress; GO:0055114 oxidation-reduction process;	gi|659096990|ref|XP_008449386.1| PREDICTED: probable glutathione peroxidase 5 [Cucumis melo]	AT2G48150.1 | Symbols: ATGPX4, GPX4 | glutathione peroxidase 4 | chr2:19688109-19689099 REVERSE LENGTH=170	sp|Q8L910|GPX4_ARATH Probable glutathione peroxidase 4 OS=Arabidopsis thaliana GN=GPX4 PE=2 SV=1	0.463303
Bhi03G000776	yellow	chr3	IPR004883 Lateral organ boundaries, LOB	-	gi|449448242|ref|XP_004141875.1| PREDICTED: LOB domain-containing protein 37-like [Cucumis sativus] >gi|700193393|gb|KGN48597.1| LOB domain-containing protein [Cucumis sativus]	AT3G49940.1 | Symbols: LBD38 | LOB domain-containing protein 38 | chr3:18514465-18515302 FORWARD LENGTH=247	sp|Q9SN23|LBD38_ARATH LOB domain-containing protein 38 OS=Arabidopsis thaliana GN=LBD38 PE=2 SV=1	0.463197
Bhi01G001452	blue	chr1	-	-	gi|1035930788|gb|OAY60374.1| hypothetical protein MANES_01G107200 [Manihot esculenta]	-	-	0.453541
Bhi10G001254	turquoise	chr10	IPR001128 Cytochrome P450; IPR002401 Cytochrome P450, E-class, group I; IPR017972 Cytochrome P450, conserved site	GO:0005506 iron ion binding; GO:0016705 oxidoreductase activity, acting on paired donors, with incorporation or reduction of molecular oxygen; GO:0020037 heme binding; GO:0055114 oxidation-reduction process;	gi|659111621|ref|XP_008455824.1| PREDICTED: cytochrome P450 81D1-like [Cucumis melo]	AT4G37320.1 | Symbols: CYP81D5 | cytochrome P450, family 81, subfamily D, polypeptide 5 | chr4:17559742-17561690 REVERSE LENGTH=495	sp|P93147|C81E1_GLYEC Isoflavone 2'-hydroxylase OS=Glycyrrhiza echinata GN=CYP81E1 PE=1 SV=2	0.439344
Bhi08G000788	brown	chr8	-	-	gi|778662115|ref|XP_011659364.1| PREDICTED: uncharacterized protein LOC105436169 [Cucumis sativus] >gi|700210877|gb|KGN65973.1| hypothetical protein Csa_1G555090 [Cucumis sativus]	AT5G36100.1 | Symbols: | unknown protein; BEST Arabidopsis thaliana protein match is: unknown protein (TAIR:AT1G65090.3); Has 57 Blast hits to 49 proteins in 15 species: Archae - 0; Bacteria - 4; Metazoa - 6; Fungi - 0; Plants - 39; Viruses - 0; Other Eukaryotes - 8 (source: NCBI BLink). | chr5:14191711-14193654 REVERSE LENGTH=295	-	0.439337
Bhi08G001423	green	chr8	IPR013766 Thioredoxin domain; IPR012336 Thioredoxin-like fold; IPR005746 Thioredoxin	GO:0045454 cell redox homeostasis;	gi|659067849|ref|XP_008441601.1| PREDICTED: thioredoxin-like protein CXXS1 [Cucumis melo]	AT1G11530.1 | Symbols: ATCXXS1, CXXS1 | C-terminal cysteine residue is changed to a serine 1 | chr1:3874518-3875311 FORWARD LENGTH=118	sp|Q8LDI5|CXXS1_ARATH Thioredoxin-like protein CXXS1 OS=Arabidopsis thaliana GN=CXXS1 PE=2 SV=2	0.436986
Bhi09G001865	black	chr9	IPR003729 Bifunctional nuclease domain	GO:0004518 nuclease activity;	gi|659133054|ref|XP_008466529.1| PREDICTED: bifunctional nuclease 1 [Cucumis melo] >gi|659133056|ref|XP_008466530.1| PREDICTED: bifunctional nuclease 1 [Cucumis melo]	AT1G19660.2 | Symbols: | Wound-responsive family protein | chr1:6800361-6802240 REVERSE LENGTH=329	sp|Q93VH2|BBD2_ARATH Bifunctional nuclease 2 OS=Arabidopsis thaliana GN=BBD2 PE=2 SV=1	0.436658
Bhi12G001773	brown	chr12	IPR018451 NAF/FISL domain; IPR004041 NAF domain; IPR017441 Protein kinase, ATP binding site; IPR000719 Protein kinase domain; IPR028375 KA1 domain/Ssp2, C-terminal; IPR002290 Serine/threonine/dual specificity protein kinase, catalytic domain; IPR008271 Serine/threonine-protein kinase, active site; IPR011009 Protein kinase-like domain	GO:0007165 signal transduction;	gi|778709001|ref|XP_011656328.1| PREDICTED: CBL-interacting serine/threonine-protein kinase 1-like isoform X2 [Cucumis sativus] >gi|700190421|gb|KGN45625.1| hypothetical protein Csa_6G001220 [Cucumis sativus]	AT3G17510.1 | Symbols: CIPK1, SnRK3.16 | CBL-interacting protein kinase 1 | chr3:5989309-5992627 REVERSE LENGTH=444	sp|Q8RWC9|CIPK1_ARATH CBL-interacting serine/threonine-protein kinase 1 OS=Arabidopsis thaliana GN=CIPK1 PE=1 SV=2	0.42207
Bhi04G001607	blue	chr4	IPR020548 Fructose-1,6-bisphosphatase, active site; IPR028343 Fructose-1,6-bisphosphatase; IPR000146 Fructose-1,6-bisphosphatase class 1/Sedoheputulose-1,7-bisphosphatase	GO:0005975 carbohydrate metabolic process; GO:0042578 phosphoric ester hydrolase activity;	gi|659089962|ref|XP_008445761.1| PREDICTED: fructose-1,6-bisphosphatase, cytosolic [Cucumis melo]	AT1G43670.1 | Symbols: | Inositol monophosphatase family protein | chr1:16468184-16470347 FORWARD LENGTH=341	sp|P14766|F16P2_SPIOL Fructose-1,6-bisphosphatase, cytosolic OS=Spinacia oleracea PE=1 SV=2	0.421672
Bhi07G001356	brown	chr7	IPR023214 HAD-like domain; IPR001830 Glycosyl transferase, family 20; IPR006379 HAD-superfamily hydrolase, subfamily IIB; IPR003337 Trehalose-phosphatase	-	gi|449434901|ref|XP_004135234.1| PREDICTED: probable alpha,alpha-trehalose-phosphate synthase [UDP-forming] 9 [Cucumis sativus] >gi|700196642|gb|KGN51819.1| Trehalose-6-phosphate synthase [Cucumis sativus]	AT1G23870.1 | Symbols: ATTPS9, TPS9 | trehalose-phosphatase/synthase 9 | chr1:8432695-8435506 FORWARD LENGTH=867	sp|Q9LRA7|TPS9_ARATH Probable alpha,alpha-trehalose-phosphate synthase [UDP-forming] 9 OS=Arabidopsis thaliana GN=TPS9 PE=2 SV=1	0.420337
Bhi12G001913	black	chr12	IPR008998 Agglutinin domain	-	gi|659117569|ref|XP_008458670.1| PREDICTED: uncharacterized protein LOC103497999 [Cucumis melo]	-	-	0.411324
Bhi10G000207	brown	chr10	IPR015422 Pyridoxal phosphate-dependent transferase, major region, subdomain 2; IPR024169 Serine-pyruvate aminotransferase/2-aminoethylphosphonate-pyruvate transaminase; IPR015424 Pyridoxal phosphate-dependent transferase; IPR020578 Aminotransferase class-V, pyridoxal-phosphate binding site; IPR000192 Aminotransferase class V domain; IPR015421 Pyridoxal phosphate-dependent transferase, major regi…	GO:0003824 catalytic activity;	gi|659097519|ref|XP_008449670.1| PREDICTED: serine--glyoxylate aminotransferase-like isoform X1 [Cucumis melo] >gi|34014758|gb|AAQ56195.1| aminotransferase 2 [Cucumis melo]	AT2G13360.2 | Symbols: AGT, AGT1, SGAT | alanine:glyoxylate aminotransferase | chr2:5539417-5540902 REVERSE LENGTH=401	sp|Q56YA5|SGAT_ARATH Serine--glyoxylate aminotransferase OS=Arabidopsis thaliana GN=AGT1 PE=1 SV=2	0.409507
Bhi06G000157	turquoise	chr6	IPR002182 NB-ARC; IPR000157 Toll/interleukin-1 receptor homology (TIR) domain; IPR027417 P-loop containing nucleoside triphosphate hydrolase; IPR032675 Leucine-rich repeat domain, L domain-like; IPR011991 Winged helix-turn-helix DNA-binding domain	GO:0043531 ADP binding;	gi|1035417636|ref|XP_016902418.1| PREDICTED: TMV resistance protein N-like [Cucumis melo]	AT5G17680.1 | Symbols: | disease resistance protein (TIR-NBS-LRR class), putative | chr5:5822999-5827153 FORWARD LENGTH=1294	sp|Q40392|TMVRN_NICGU TMV resistance protein N OS=Nicotiana glutinosa GN=N PE=1 SV=1	0.409449
Bhi01G000734	yellow	chr1	IPR015761 Lipoamide Acyltransferase; IPR004167 E3-binding domain; IPR001078 2-oxoacid dehydrogenase acyltransferase, catalytic domain; IPR000089 Biotin/lipoyl attachment; IPR011053 Single hybrid motif; IPR023213 Chloramphenicol acetyltransferase-like domain; IPR003016 2-oxo acid dehydrogenase, lipoyl-binding site	-	gi|659076861|ref|XP_008438901.1| PREDICTED: lipoamide acyltransferase component of branched-chain alpha-keto acid dehydrogenase complex, mitochondrial [Cucumis melo]	AT3G06850.2 | Symbols: BCE2, LTA1, DIN3 | 2-oxoacid dehydrogenases acyltransferase family protein | chr3:2158212-2160465 REVERSE LENGTH=483	sp|Q9M7Z1|ODB2_ARATH Lipoamide acyltransferase component of branched-chain alpha-keto acid dehydrogenase complex, mitochondrial OS=Arabidopsis thaliana GN=BCE2 PE=1 SV=1	0.408382
Bhi02G000281	turquoise	chr2	IPR001372 Dynein light chain, type 1/2	GO:0005875 microtubule associated complex; GO:0007017 microtubule-based process;	gi|778655837|ref|XP_004138141.2| PREDICTED: uncharacterized protein LOC101215824 [Cucumis sativus] >gi|700208537|gb|KGN63633.1| hypothetical protein Csa_1G008410 [Cucumis sativus]	AT5G20110.1 | Symbols: | Dynein light chain type 1 family protein | chr5:6791542-6793253 REVERSE LENGTH=209	sp|Q86A88|DYL_DICDI Dynein light chain, cytoplasmic OS=Dictyostelium discoideum GN=dlcB PE=3 SV=1	0.407088
Bhi02G001828	blue	chr2	-	-	-	-	-	0.405926
Bhi01G002483	green	chr1	IPR032710 NTF2-like domain	-	gi|659101719|ref|XP_008451756.1| PREDICTED: pathogen-related protein isoform X1 [Cucumis melo] >gi|1035408817|ref|XP_016901136.1| PREDICTED: pathogen-related protein isoform X1 [Cucumis melo]	AT1G78780.2 | Symbols: | pathogenesis-related family protein | chr1:29621447-29622431 REVERSE LENGTH=238	sp|P16273|PRPX_HORVU Pathogen-related protein OS=Hordeum vulgare PE=2 SV=2	0.405502
Bhi09G002528	brown	chr9	-	-	gi|449447177|ref|XP_004141345.1| PREDICTED: vitellogenin-2-like [Cucumis sativus] >gi|700200224|gb|KGN55382.1| hypothetical protein Csa_4G648530 [Cucumis sativus]	AT5G21940.1 | Symbols: | unknown protein; BEST Arabidopsis thaliana protein match is: unknown protein (TAIR:AT3G43850.1); Has 30201 Blast hits to 17322 proteins in 780 species: Archae - 12; Bacteria - 1396; Metazoa - 17338; Fungi - 3422; Plants - 5037; Viruses - 0; Other Eukaryotes - 2996 (source: NCBI BLink). | chr5:7249446-7250353 REVERSE LENGTH=264	-	0.404405
Bhi12G000136	yellow	chr12	IPR001471 AP2/ERF domain; IPR016177 DNA-binding domain	GO:0003700 transcription factor activity, sequence-specific DNA binding; GO:0006355 regulation of transcription, DNA-templated;	gi|449452245|ref|XP_004143870.1| PREDICTED: ethylene-responsive transcription factor ERF061-like [Cucumis sativus] >gi|700194847|gb|KGN50024.1| hypothetical protein Csa_5G150420 [Cucumis sativus]	AT1G64380.1 | Symbols: | Integrase-type DNA-binding superfamily protein | chr1:23890981-23891988 REVERSE LENGTH=335	sp|Q9C7W2|ERF61_ARATH Ethylene-responsive transcription factor ERF061 OS=Arabidopsis thaliana GN=ERF061 PE=2 SV=1	0.399761
Bhi05G001093	green	chr5	-	-	gi|659092369|ref|XP_008447033.1| PREDICTED: BTB/POZ domain-containing protein At3g05675-like [Cucumis melo]	AT1G63850.1 | Symbols: | BTB/POZ domain-containing protein | chr1:23696962-23698708 FORWARD LENGTH=548	sp|Q9CAJ9|Y1385_ARATH BTB/POZ domain-containing protein At1g63850 OS=Arabidopsis thaliana GN=At1g63850 PE=1 SV=1	0.399256
BhiUN952G4	yellow	Contig952	-	-	gi|659118642|ref|XP_008459226.1| PREDICTED: CCG-binding protein 1 [Cucumis melo]	AT2G15890.1 | Symbols: MEE14 | maternal effect embryo arrest 14 | chr2:6921196-6921978 REVERSE LENGTH=203	sp|Q9XIM0|MEE14_ARATH CCG-binding protein 1 OS=Arabidopsis thaliana GN=MEE14 PE=1 SV=1	0.397205
Bhi03G000301	turquoise	chr3	IPR008406 Dormancyauxin associated	-	gi|270309006|dbj|BAI52956.1| auxin-repressed protein [Citrullus lanatus subsp. vulgaris]	AT1G28330.1 | Symbols: DRM1, DYL1 | dormancy-associated protein-like 1 | chr1:9934252-9935216 REVERSE LENGTH=122	sp|Q05349|12KD_FRAAN Auxin-repressed 12.5 kDa protein OS=Fragaria ananassa PE=2 SV=1	0.396743
Bhi02G001759	green	chr2	IPR008406 Dormancyauxin associated	-	gi|1063507207|ref|XP_007031019.2| PREDICTED: dormancy-associated protein homolog 3 isoform X1 [Theobroma cacao]	AT1G56220.1 | Symbols: | Dormancy/auxin associated family protein | chr1:21043414-21044469 FORWARD LENGTH=137	sp|Q8LD26|DRMH3_ARATH Dormancy-associated protein homolog 3 OS=Arabidopsis thaliana GN=At1g56220 PE=1 SV=1	0.393858
Bhi11G002214	yellow	chr11	IPR029058 Alpha/Beta hydrolase fold; IPR019149 Protein of unknown function DUF2048	-	gi|659084804|ref|XP_008443082.1| PREDICTED: protein ABHD18 [Cucumis melo]	AT3G12150.1 | Symbols: | unknown protein; CONTAINS InterPro DOMAIN/s: Protein of unknown function DUF2048 (InterPro:IPR019149); Has 421 Blast hits to 334 proteins in 155 species: Archae - 2; Bacteria - 147; Metazoa - 215; Fungi - 0; Plants - 43; Viruses - 0; Other Eukaryotes - 14 (source: NCBI BLink). | chr3:3876688-3878621 REVERSE LENGTH=363	sp|Q8C1A9|ABD18_MOUSE Protein ABHD18 OS=Mus musculus GN=Abhd18 PE=2 SV=1	0.387811
Bhi11G001453	turquoise	chr11	IPR001841 Zinc finger, RING-type; IPR013083 Zinc finger, RING/FYVE/PHD-type	GO:0005515 protein binding; GO:0008270 zinc ion binding;	gi|659085724|ref|XP_008443568.1| PREDICTED: RING-H2 finger protein ATL74-like [Cucumis melo]	AT5G05280.1 | Symbols: | RING/U-box superfamily protein | chr5:1565509-1566039 REVERSE LENGTH=176	sp|Q9FLC6|ATL73_ARATH RING-H2 finger protein ATL73 OS=Arabidopsis thaliana GN=ATL73 PE=2 SV=1	0.383388
Bhi09G000064	red	chr9	-	-	-	-	-	0.3786
Bhi08G001311	blue	chr8	IPR012317 Poly(ADP-ribose) polymerase, catalytic domain; IPR022003 RST domain of plant C-terminal	GO:0003950 NAD+ ADP-ribosyltransferase activity;	gi|449469695|ref|XP_004152554.1| PREDICTED: probable inactive poly [ADP-ribose] polymerase SRO5 isoform X1 [Cucumis sativus] >gi|700209212|gb|KGN64308.1| hypothetical protein Csa_1G046060 [Cucumis sativus]	AT5G62520.1 | Symbols: SRO5 | similar to RCD one 5 | chr5:25098071-25099264 FORWARD LENGTH=309	sp|Q9FJJ3|SRO5_ARATH Probable inactive poly [ADP-ribose] polymerase SRO5 OS=Arabidopsis thaliana GN=SRO5 PE=1 SV=1	0.378329
Bhi03G001632	blue	chr3	IPR010987 Glutathione S-transferase, C-terminal-like; IPR012336 Thioredoxin-like fold; IPR004045 Glutathione S-transferase, N-terminal; IPR004046 Glutathione S-transferase, C-terminal	-	gi|449460359|ref|XP_004147913.1| PREDICTED: glutathione S-transferase U8-like [Cucumis sativus] >gi|700199160|gb|KGN54318.1| hypothetical protein Csa_4G303170 [Cucumis sativus]	AT3G09270.1 | Symbols: ATGSTU8, GSTU8 | glutathione S-transferase TAU 8 | chr3:2848407-2849226 REVERSE LENGTH=224	sp|Q9SR36|GSTU8_ARATH Glutathione S-transferase U8 OS=Arabidopsis thaliana GN=GSTU8 PE=2 SV=1	0.376641
Bhi05G000624	turquoise	chr5	IPR002213 UDP-glucuronosyl/UDP-glucosyltransferase	GO:0008152 metabolic process; GO:0016758 transferase activity, transferring hexosyl groups;	gi|778724192|ref|XP_011658756.1| PREDICTED: UDP-glycosyltransferase 74F2-like [Cucumis sativus] >gi|700188428|gb|KGN43661.1| hypothetical protein Csa_7G051410 [Cucumis sativus]	AT2G43820.1 | Symbols: GT, UGT74F2, ATSAGT1, SGT1, SAGT1 | UDP-glucosyltransferase 74F2 | chr2:18152279-18153715 FORWARD LENGTH=449	sp|O22822|U74F2_ARATH UDP-glycosyltransferase 74F2 OS=Arabidopsis thaliana GN=UGT74F2 PE=1 SV=1	0.373857
Bhi07G000391	blue	chr7	IPR002401 Cytochrome P450, E-class, group I; IPR017972 Cytochrome P450, conserved site; IPR001128 Cytochrome P450	GO:0005506 iron ion binding; GO:0016705 oxidoreductase activity, acting on paired donors, with incorporation or reduction of molecular oxygen; GO:0020037 heme binding; GO:0055114 oxidation-reduction process;	gi|449457460|ref|XP_004146466.1| PREDICTED: cytochrome P450 714A1-like [Cucumis sativus]	AT5G24910.1 | Symbols: CYP714A1 | cytochrome P450, family 714, subfamily A, polypeptide 1 | chr5:8567674-8570260 REVERSE LENGTH=532	sp|Q93Z79|C14A1_ARATH Cytochrome P450 714A1 OS=Arabidopsis thaliana GN=CYP714A1 PE=2 SV=1	0.371071
Bhi04G000572	yellow	chr4	-	-	-	-	-	0.370314
Bhi12G000274	turquoise	chr12	IPR029033 Histidine phosphatase superfamily; IPR013078 Histidine phosphatase superfamily, clade-1; IPR001345 Phosphoglycerate/bisphosphoglycerate mutase, active site	-	gi|659073902|ref|XP_008437314.1| PREDICTED: phosphoglycerate mutase-like protein AT74H [Cucumis melo]	AT3G05170.1 | Symbols: | Phosphoglycerate mutase family protein | chr3:1466738-1468219 FORWARD LENGTH=316	sp|Q9MAA2|AT74_ARATH Phosphoglycerate mutase-like protein AT74 OS=Arabidopsis thaliana GN=At3g05170 PE=2 SV=1	0.368939
Bhi08G000403	brown	chr8	IPR003855 Potassium transporter	GO:0015079 potassium ion transmembrane transporter activity; GO:0016020 membrane; GO:0071805 potassium ion transmembrane transport;	gi|778661753|ref|XP_011658672.1| PREDICTED: potassium transporter 1 isoform X1 [Cucumis sativus]	AT2G30070.1 | Symbols: ATKT1, ATKT1P, ATKUP1, KUP1, KT1 | potassium transporter 1 | chr2:12835097-12838466 FORWARD LENGTH=712	sp|O22397|POT1_ARATH Potassium transporter 1 OS=Arabidopsis thaliana GN=POT1 PE=1 SV=2	0.367588
Bhi11G000119	brown	chr11	IPR011990 Tetratricopeptide-like helical domain; IPR002885 Pentatricopeptide repeat; IPR002625 Smr domain	GO:0005515 protein binding;	gi|449462001|ref|XP_004148730.1| PREDICTED: pentatricopeptide repeat-containing protein At5g46580, chloroplastic [Cucumis sativus] >gi|700200648|gb|KGN55781.1| hypothetical protein Csa_3G011820 [Cucumis sativus]	AT5G46580.1 | Symbols: | pentatricopeptide (PPR) repeat-containing protein | chr5:18897510-18899645 REVERSE LENGTH=711	sp|Q9LS25|PP420_ARATH Pentatricopeptide repeat-containing protein At5g46580, chloroplastic OS=Arabidopsis thaliana GN=At5g46580 PE=2 SV=1	0.367032
Bhi03G000982	brown	chr3	-	-	gi|659081044|ref|XP_008441120.1| PREDICTED: homeobox-leucine zipper protein ATHB-40, partial [Cucumis melo]	-	-	0.361744
Bhi10G000322	turquoise	chr10	IPR002016 Haem peroxidase, plant/fungal/bacterial; IPR010255 Haem peroxidase; IPR000823 Plant peroxidase; IPR019794 Peroxidase, active site; IPR019793 Peroxidases heam-ligand binding site	GO:0004601 peroxidase activity; GO:0006979 response to oxidative stress; GO:0020037 heme binding; GO:0055114 oxidation-reduction process;	gi|1115572944|gb|APO14264.1| peroxidase 2 [Luffa aegyptiaca]	AT5G06720.1 | Symbols: ATPA2, PA2 | peroxidase 2 | chr5:2077567-2078857 REVERSE LENGTH=335	sp|P19135|PER2_CUCSA Peroxidase 2 (Fragment) OS=Cucumis sativus PE=2 SV=1	0.358045
BhiUN130G9	turquoise	Contig130	-	-	gi|1012366490|gb|KYP77671.1| hypothetical protein KK1_048134, partial [Cajanus cajan]	-	-	0.354364
Bhi11G001762	green	chr11	IPR020845 AMP-binding, conserved site; IPR025110 AMP-binding enzyme C-terminal domain; IPR000873 AMP-dependent synthetase/ligase	-	gi|778683912|ref|XP_011651966.1| PREDICTED: 4-coumarate--CoA ligase-like 7 [Cucumis sativus] >gi|700203851|gb|KGN58984.1| hypothetical protein Csa_3G740270 [Cucumis sativus]	AT4G05160.1 | Symbols: | AMP-dependent synthetase and ligase family protein | chr4:2664451-2666547 FORWARD LENGTH=544	sp|Q9M0X9|4CLL7_ARATH 4-coumarate--CoA ligase-like 7 OS=Arabidopsis thaliana GN=4CLL7 PE=1 SV=1	0.351446
Bhi09G000723	brown	chr9	IPR004926 Late embryogenesis abundant protein, LEA-5	GO:0006950 response to stress;	gi|449436481|ref|XP_004136021.1| PREDICTED: indole-3-acetic acid-induced protein ARG2 [Cucumis sativus] >gi|700189714|gb|KGN44947.1| Protein induced upon tuberization [Cucumis sativus]	AT4G02380.1 | Symbols: SAG21, AtLEA5 | senescence-associated gene 21 | chr4:1046414-1046807 REVERSE LENGTH=97	sp|P32292|ARG2_VIGRR Indole-3-acetic acid-induced protein ARG2 OS=Vigna radiata var. radiata GN=ARG2 PE=2 SV=1	0.349006
Bhi01G002251	green	chr1	-	-	gi|449453350|ref|XP_004144421.1| PREDICTED: uncharacterized protein LOC101222094 [Cucumis sativus] >gi|700203297|gb|KGN58430.1| hypothetical protein Csa_3G642710 [Cucumis sativus]	AT1G16850.1 | Symbols: | unknown protein; FUNCTIONS IN: molecular_function unknown; INVOLVED IN: response to salt stress; LOCATED IN: endomembrane system; EXPRESSED IN: leaf apex, leaf whorl, male gametophyte, flower, leaf; EXPRESSED DURING: LP.06 six leaves visible, LP.04 four leaves visible, LP.10 ten leaves visible, petal differentiation and expansion stage, LP.08 eight leaves visible; BEST Ar…	-	0.342995
Bhi09G002671	black	chr9	IPR004883 Lateral organ boundaries, LOB	-	gi|449447289|ref|XP_004141401.1| PREDICTED: LOB domain-containing protein 39-like [Cucumis sativus] >gi|700200104|gb|KGN55262.1| hypothetical protein Csa_4G642430 [Cucumis sativus]	AT4G37540.1 | Symbols: LBD39 | LOB domain-containing protein 39 | chr4:17639649-17640509 REVERSE LENGTH=240	sp|Q9SZE8|LBD39_ARATH LOB domain-containing protein 39 OS=Arabidopsis thaliana GN=LBD39 PE=2 SV=1	0.328112
Bhi06G001593	brown	chr6	IPR009060 UBA-like; IPR015940 Ubiquitin-associated domain; IPR000626 Ubiquitin domain; IPR029071 Ubiquitin-related domain	GO:0005515 protein binding;	gi|659070931|ref|XP_008457303.1| PREDICTED: NEDD8 ultimate buster 1 [Cucumis melo]	AT2G12550.1 | Symbols: | ubiquitin-associated (UBA)/TS-N domain-containing protein | chr2:5114881-5118486 FORWARD LENGTH=562	sp|P54729|NUB1_MOUSE NEDD8 ultimate buster 1 OS=Mus musculus GN=Nub1 PE=1 SV=2	0.326926
Bhi09G001621	green	chr9	-	-	gi|778688640|ref|XP_011652800.1| PREDICTED: uncharacterized protein LOC105435101 [Cucumis sativus]	AT3G21710.2 | Symbols: | unknown protein; Has 35333 Blast hits to 34131 proteins in 2444 species: Archae - 798; Bacteria - 22429; Metazoa - 974; Fungi - 991; Plants - 531; Viruses - 0; Other Eukaryotes - 9610 (source: NCBI BLink). | chr3:7648380-7649533 FORWARD LENGTH=211	-	0.320338
Bhi09G000440	black	chr9	IPR003480 Transferase; IPR023213 Chloramphenicol acetyltransferase-like domain	GO:0016747 transferase activity, transferring acyl groups other than amino-acyl groups;	gi|700189979|gb|KGN45212.1| hypothetical protein Csa_7G431440 [Cucumis sativus]	AT5G48930.1 | Symbols: HCT | hydroxycinnamoyl-CoA shikimate/quinate hydroxycinnamoyl transferase | chr5:19836654-19838092 REVERSE LENGTH=433	sp|Q9FI78|HST_ARATH Shikimate O-hydroxycinnamoyltransferase OS=Arabidopsis thaliana GN=HST PE=2 SV=1	0.311874
BhiUN727G21	brown	Contig727	IPR029063 S-adenosyl-L-methionine-dependent methyltransferase; IPR005299 SAM dependent carboxyl methyltransferase	-	gi|778719525|ref|XP_011658025.1| PREDICTED: salicylate carboxymethyltransferase-like [Cucumis sativus]	AT3G11480.1 | Symbols: BSMT1, ATBSMT1 | S-adenosyl-L-methionine-dependent methyltransferases superfamily protein | chr3:3614544-3617137 FORWARD LENGTH=379	sp|Q9SPV4|SAMT_CLABR Salicylate carboxymethyltransferase OS=Clarkia breweri GN=SAMT PE=1 SV=1	0.310706
Bhi11G001693	turquoise	chr11	IPR025886 Phloem protein 2-like; IPR001810 F-box domain	-	gi|659084238|ref|XP_008442784.1| PREDICTED: F-box protein PP2-A15 isoform X2 [Cucumis melo]	AT3G53000.1 | Symbols: AtPP2-A15, PP2-A15 | phloem protein 2-A15 | chr3:19654278-19655801 FORWARD LENGTH=300	sp|Q9LF92|P2A15_ARATH F-box protein PP2-A15 OS=Arabidopsis thaliana GN=PP2A15 PE=2 SV=1	0.309854
Bhi09G001538	brown	chr9	IPR011607 Methylglyoxal synthase-like domain; IPR013816 ATP-grasp fold, subdomain 2; IPR006275 Carbamoyl-phosphate synthase, large subunit; IPR016185 Pre-ATP-grasp domain; IPR005480 Carbamoyl-phosphate synthetase, large subunit oligomerisation domain; IPR011761 ATP-grasp fold; IPR005479 Carbamoyl-phosphate synthetase large subunit-like, ATP-binding domain; IPR013815 ATP-grasp fold, subdomain 1; I…	-	gi|449444004|ref|XP_004139765.1| PREDICTED: carbamoyl-phosphate synthase large chain, chloroplastic [Cucumis sativus] >gi|700188871|gb|KGN44104.1| hypothetical protein Csa_7G189190 [Cucumis sativus]	AT1G29900.1 | Symbols: CARB | carbamoyl phosphate synthetase B | chr1:10468164-10471976 FORWARD LENGTH=1187	sp|Q42601|CARB_ARATH Carbamoyl-phosphate synthase large chain, chloroplastic OS=Arabidopsis thaliana GN=CARB PE=1 SV=1	0.307247
Bhi06G000864	turquoise	chr6	IPR003959 ATPase, AAA-type, core; IPR027417 P-loop containing nucleoside triphosphate hydrolase	GO:0005524 ATP binding;	gi|1035420270|ref|XP_008461692.2| PREDICTED: ribulose bisphosphate carboxylase/oxygenase activase 2, chloroplastic-like [Cucumis melo]	AT2G39730.3 | Symbols: RCA | rubisco activase | chr2:16571174-16573345 REVERSE LENGTH=441	sp|O98997|RCA_VIGRR Ribulose bisphosphate carboxylase/oxygenase activase, chloroplastic OS=Vigna radiata var. radiata GN=RCA PE=2 SV=2	0.303203
Bhi02G000763	turquoise	chr2	-	-	gi|778665035|ref|XP_011648470.1| PREDICTED: uncharacterized vacuolar membrane protein YML018C-like [Cucumis sativus]	AT4G32140.1 | Symbols: | EamA-like transporter family | chr4:15523037-15525195 REVERSE LENGTH=394	-	0.298441
Bhi09G002771	turquoise	chr9	IPR000215 Serpin family; IPR023796 Serpin domain	GO:0005615 extracellular space;	gi|659103135|ref|XP_008452492.1| PREDICTED: serpin-ZX-like [Cucumis melo]	AT1G47710.1 | Symbols: | Serine protease inhibitor (SERPIN) family protein | chr1:17558271-17560061 FORWARD LENGTH=391	sp|Q9S7T8|SPZX_ARATH Serpin-ZX OS=Arabidopsis thaliana GN=At1g47710 PE=1 SV=1	0.291973
Bhi09G001680	brown	chr9	IPR001372 Dynein light chain, type 1/2	GO:0005875 microtubule associated complex; GO:0007017 microtubule-based process;	gi|659109266|ref|XP_008454627.1| PREDICTED: dynein light chain LC6, flagellar outer arm [Cucumis melo]	AT4G27360.1 | Symbols: | Dynein light chain type 1 family protein | chr4:13694032-13694517 FORWARD LENGTH=103	sp|O02414|DYL1_HELCR Dynein light chain LC6, flagellar outer arm OS=Heliocidaris crassispina PE=3 SV=1	0.288597
Bhi09G002425	turquoise	chr9	IPR013780 Glycosyl hydrolase, family 13, all-beta; IPR015902 Glycoside hydrolase, family 13; IPR013781 Glycoside hydrolase, catalytic domain; IPR012850 Alpha-amylase, C-terminal beta-sheet; IPR017853 Glycoside hydrolase superfamily; IPR006589 Glycosyl hydrolase, family 13, subfamily, catalytic domain	-	gi|659104357|ref|XP_008452915.1| PREDICTED: probable alpha-amylase 2 isoform X2 [Cucumis melo]	AT1G76130.1 | Symbols: ATAMY2, AMY2 | alpha-amylase-like 2 | chr1:28561647-28563914 FORWARD LENGTH=413	sp|Q8LFG1|AMY2_ARATH Probable alpha-amylase 2 OS=Arabidopsis thaliana GN=AMY2 PE=2 SV=1	0.285253
Bhi10G000132	yellow	chr10	IPR001810 F-box domain	GO:0005515 protein binding;	gi|1035406161|ref|XP_016900730.1| PREDICTED: probable F-box protein At1g60180 [Cucumis melo]	AT3G44326.1 | Symbols: | F-box family protein | chr3:16000933-16002024 REVERSE LENGTH=363	sp|Q2V3R1|FB346_ARATH F-box protein At3g44326 OS=Arabidopsis thaliana GN=At3g44326 PE=2 SV=1	0.282585
Bhi05G001801	brown	chr5	IPR001471 AP2/ERF domain; IPR016177 DNA-binding domain	GO:0003700 transcription factor activity, sequence-specific DNA binding; GO:0006355 regulation of transcription, DNA-templated;	gi|449444731|ref|XP_004140127.1| PREDICTED: ethylene-responsive transcription factor 3-like [Cucumis sativus] >gi|700192768|gb|KGN47972.1| hypothetical protein Csa_6G421660 [Cucumis sativus]	AT1G50640.1 | Symbols: ERF3, ATERF3 | ethylene responsive element binding factor 3 | chr1:18757602-18758279 REVERSE LENGTH=225	sp|O80339|ERF82_ARATH Ethylene-responsive transcription factor 3 OS=Arabidopsis thaliana GN=ERF3 PE=1 SV=1	0.270101
Bhi03G000059	yellow	chr3	IPR013785 Aldolase-type TIM barrel; IPR007570 Uncharacterised protein family Ycf23	GO:0003824 catalytic activity;	gi|1035395443|ref|XP_016899174.1| PREDICTED: uncharacterized protein ycf23-like [Cucumis melo]	-	sp|Q1XDB4|YCF23_PYRYE Uncharacterized protein ycf23 OS=Pyropia yezoensis GN=ycf23 PE=3 SV=1	0.267568
Bhi10G001562	blue	chr10	IPR001841 Zinc finger, RING-type; IPR001752 Kinesin motor domain; IPR019821 Kinesin motor domain, conserved site; IPR013083 Zinc finger, RING/FYVE/PHD-type; IPR027640 Kinesin-like protein; IPR027417 P-loop containing nucleoside triphosphate hydrolase	GO:0005515 protein binding; GO:0008270 zinc ion binding;	gi|659122166|ref|XP_008461002.1| PREDICTED: kinesin-related protein 11-like [Cucumis melo]	AT4G39050.1 | Symbols: | Kinesin motor family protein | chr4:18193462-18200148 FORWARD LENGTH=1055	sp|Q8W5R5|KN7D_ARATH Kinesin-like protein KIN-7D, mitochondrial OS=Arabidopsis thaliana GN=KIN7D PE=2 SV=1	0.266385
Bhi02G000997	brown	chr2	-	-	gi|57013947|ref|YP_173420.1| hypothetical protein NitaMp078 [Nicotiana tabacum] >gi|56806583|dbj|BAD83484.1| hypothetical protein (mitochondrion) [Nicotiana tabacum] >gi|1102278273|gb|OIT26820.1| hypothetical protein A4A49_42013 [Nicotiana attenuata]	-	-	0.264299
BhiUN179G27	turquoise	Contig179	IPR011598 Myc-type, basic helix-loop-helix (bHLH) domain; IPR025610 Transcription factor MYC/MYB N-terminal	GO:0046983 protein dimerization activity;	gi|778674792|ref|XP_004146202.2| PREDICTED: transcription factor MYC3-like isoform X2 [Cucumis sativus] >gi|700200534|gb|KGN55667.1| hypothetical protein Csa_3G002860 [Cucumis sativus]	AT5G46830.1 | Symbols: ATNIG1, NIG1 | NACL-inducible gene 1 | chr5:19002719-19004254 FORWARD LENGTH=511	sp|Q9LUK7|BH028_ARATH Transcription factor bHLH28 OS=Arabidopsis thaliana GN=BHLH28 PE=2 SV=1	0.261529
BhiUN533G18	green	Contig533	IPR026992 Non-haem dioxygenase N-terminal domain; IPR005123 Oxoglutarate/iron-dependent dioxygenase; IPR027443 Isopenicillin N synthase-like	-	gi|1035393543|ref|XP_008438549.2| PREDICTED: 1-aminocyclopropane-1-carboxylate oxidase homolog 1-like [Cucumis melo]	AT1G06620.1 | Symbols: | 2-oxoglutarate (2OG) and Fe(II)-dependent oxygenase superfamily protein | chr1:2025618-2027094 FORWARD LENGTH=365	sp|Q84MB3|ACCH1_ARATH 1-aminocyclopropane-1-carboxylate oxidase homolog 1 OS=Arabidopsis thaliana GN=At1g06620 PE=2 SV=1	0.259685
Bhi06G000301	yellow	chr6	IPR009769 Domain of unknown function DUF1336	-	gi|659118867|ref|XP_008459350.1| PREDICTED: LOW QUALITY PROTEIN: uncharacterized protein LOC103498509 [Cucumis melo]	AT3G29180.2 | Symbols: | Protein of unknown function (DUF1336) | chr3:11149073-11151322 FORWARD LENGTH=513	-	0.252515
BhiUN587G18	blue	Contig587	IPR008166 Glycosyltransferase family 92	-	gi|659077847|ref|XP_008439419.1| PREDICTED: galactan beta-1,4-galactosyltransferase GALS3-like [Cucumis melo]	AT5G44670.1 | Symbols: | Domain of unknown function (DUF23) | chr5:18019209-18021266 REVERSE LENGTH=519	sp|Q9LTZ9|GALS2_ARATH Galactan beta-1,4-galactosyltransferase GALS2 OS=Arabidopsis thaliana GN=GALS2 PE=2 SV=1	0.248671
Bhi06G000967	turquoise	chr6	IPR027417 P-loop containing nucleoside triphosphate hydrolase; IPR002182 NB-ARC; IPR000157 Toll/interleukin-1 receptor homology (TIR) domain; IPR032675 Leucine-rich repeat domain, L domain-like	-	gi|700206145|gb|KGN61264.1| hypothetical protein Csa_2G074250 [Cucumis sativus]	AT5G36930.1 | Symbols: | Disease resistance protein (TIR-NBS-LRR class) family | chr5:14567771-14571907 REVERSE LENGTH=1188	sp|Q40392|TMVRN_NICGU TMV resistance protein N OS=Nicotiana glutinosa GN=N PE=1 SV=1	0.247637
Bhi08G000561	brown	chr8	IPR023213 Chloramphenicol acetyltransferase-like domain; IPR003480 Transferase	-	gi|778661383|ref|XP_011658005.1| PREDICTED: phenolic glucoside malonyltransferase 2-like [Cucumis sativus]	AT3G29670.1 | Symbols: | HXXXD-type acyl-transferase family protein | chr3:11527952-11529307 FORWARD LENGTH=451	sp|Q9LRQ8|PMAT2_ARATH Phenolic glucoside malonyltransferase 2 OS=Arabidopsis thaliana GN=PMAT2 PE=1 SV=1	0.245881
Bhi03G001435	turquoise	chr3	IPR029058 Alpha/Beta hydrolase fold; IPR002921 Fungal lipase-like domain	-	gi|659079484|ref|XP_008440281.1| PREDICTED: uncharacterized protein LOC103484776 [Cucumis melo]	AT5G67050.1 | Symbols: | alpha/beta-Hydrolases superfamily protein | chr5:26759482-26761165 REVERSE LENGTH=477	sp|P19515|LIP_RHIMI Lipase OS=Rhizomucor miehei PE=1 SV=2	0.245118
Bhi05G000845	blue	chr5	IPR002477 Peptidoglycan binding-like; IPR006026 Peptidase, metallopeptidase; IPR024079 Metallopeptidase, catalytic domain; IPR001818 Peptidase M10, metallopeptidase; IPR021190 Peptidase M10A	-	gi|659117648|ref|XP_008458714.1| PREDICTED: metalloendoproteinase 2-MMP-like [Cucumis melo]	AT1G70170.1 | Symbols: MMP | matrix metalloproteinase | chr1:26424005-26425141 FORWARD LENGTH=378	sp|O04529|2MMP_ARATH Metalloendoproteinase 2-MMP OS=Arabidopsis thaliana GN=2MMP PE=1 SV=1	0.24434
Bhi11G001403	green	chr11	IPR016040 NAD(P)-binding domain; IPR029753 D-isomer specific 2-hydroxyacid dehydrogenase, NAD-binding domain conserved site; IPR006140 D-isomer specific 2-hydroxyacid dehydrogenase, NAD-binding domain; IPR029752 D-isomer specific 2-hydroxyacid dehydrogenase, NAD-binding domain conserved site 1; IPR006139 D-isomer specific 2-hydroxyacid dehydrogenase, catalytic domain	-	gi|659085627|ref|XP_008443517.1| PREDICTED: formate dehydrogenase, mitochondrial [Cucumis melo]	AT5G14780.1 | Symbols: FDH | formate dehydrogenase | chr5:4777043-4779190 FORWARD LENGTH=384	sp|Q07511|FDH_SOLTU Formate dehydrogenase, mitochondrial OS=Solanum tuberosum GN=FDH1 PE=1 SV=2	0.243883
Bhi09G001629	turquoise	chr9	IPR029071 Ubiquitin-related domain; IPR019954 Ubiquitin conserved site; IPR000626 Ubiquitin domain; IPR019956 Ubiquitin	-	gi|1190990438|ref|XP_020876399.1| polyubiquitin [Arabidopsis lyrata subsp. lyrata]	AT4G05320.4 | Symbols: UBQ10 | polyubiquitin 10 | chr4:2718559-2719932 FORWARD LENGTH=457	sp|Q8H159|UBQ10_ARATH Polyubiquitin 10 OS=Arabidopsis thaliana GN=UBQ10 PE=1 SV=2	0.239482
Bhi10G000621	red	chr10	IPR021584 Thylakoid soluble phosphoprotein TSP9	-	gi|449450924|ref|XP_004143212.1| PREDICTED: uncharacterized protein LOC101205268 [Cucumis sativus] >gi|700191894|gb|KGN47098.1| hypothetical protein Csa_6G187910 [Cucumis sativus]	AT3G47070.1 | Symbols: | LOCATED IN: thylakoid, chloroplast thylakoid membrane, chloroplast, chloroplast envelope; EXPRESSED IN: 22 plant structures; EXPRESSED DURING: 13 growth stages; CONTAINS InterPro DOMAIN/s: Thylakoid soluble phosphoprotein TSP9 (InterPro:IPR021584); Has 37 Blast hits to 37 proteins in 10 species: Archae - 0; Bacteria - 0; Metazoa - 0; Fungi - 0; Plants - 37; Viruses - 0; O…	-	0.234548
Bhi08G001604	yellow	chr8	IPR015422 Pyridoxal phosphate-dependent transferase, major region, subdomain 2; IPR015424 Pyridoxal phosphate-dependent transferase; IPR015421 Pyridoxal phosphate-dependent transferase, major region, subdomain 1; IPR010107 Glutamate decarboxylase; IPR002129 Pyridoxal phosphate-dependent decarboxylase	GO:0003824 catalytic activity;	gi|659066277|ref|XP_008464604.1| PREDICTED: glutamate decarboxylase [Cucumis melo]	AT3G17760.2 | Symbols: GAD5 | glutamate decarboxylase 5 | chr3:6078893-6080838 REVERSE LENGTH=494	sp|P54767|DCE_SOLLC Glutamate decarboxylase OS=Solanum lycopersicum PE=2 SV=1	0.234487
Bhi12G001605	turquoise	chr12	IPR021109 Aspartic peptidase domain; IPR032799 Xylanase inhibitor, C-terminal; IPR001461 Aspartic peptidase; IPR032861 Xylanase inhibitor, N-terminal	-	gi|659117362|ref|XP_008458562.1| PREDICTED: basic 7S globulin-like [Cucumis melo]	AT1G03220.1 | Symbols: | Eukaryotic aspartyl protease family protein | chr1:787143-788444 FORWARD LENGTH=433	sp|P13917|7SB1_SOYBN Basic 7S globulin OS=Glycine max GN=BG PE=1 SV=2	0.233686
Bhi03G000250	green	chr3	IPR012000 Thiamine pyrophosphate enzyme, central domain; IPR029061 Thiamin diphosphate-binding fold; IPR012110 Thiamine pyrophosphate (TPP)-dependent enzyme; IPR011766 Thiamine pyrophosphate enzyme, C-terminal TPP-binding; IPR029035 DHS-like NAD/FAD-binding domain; IPR012001 Thiamine pyrophosphate enzyme, N-terminal TPP-binding domain	GO:0000287 magnesium ion binding; GO:0030976 thiamine pyrophosphate binding;	gi|449433768|ref|XP_004134669.1| PREDICTED: pyruvate decarboxylase 1-like [Cucumis sativus] >gi|700194085|gb|KGN49289.1| Pyruvate decarboxylase [Cucumis sativus]	AT5G01320.1 | Symbols: | Thiamine pyrophosphate dependent pyruvate decarboxylase family protein | chr5:129484-131625 REVERSE LENGTH=603	sp|P51850|PDC1_PEA Pyruvate decarboxylase 1 OS=Pisum sativum GN=PDC1 PE=2 SV=1	0.232333
Bhi02G000965	blue	chr2	IPR028457 ABI family	-	gi|659125446|ref|XP_008462689.1| PREDICTED: probable protein ABIL5 isoform X2 [Cucumis melo]	AT2G46225.2 | Symbols: ABIL1 | ABI-1-like 1 | chr2:18982113-18984074 FORWARD LENGTH=329	sp|Q5JMF2|ABIL5_ORYSJ Probable protein ABIL5 OS=Oryza sativa subsp. japonica GN=Os01g0760900 PE=2 SV=1	0.229108
Bhi12G000840	black	chr12	IPR002290 Serine/threonine/dual specificity protein kinase, catalytic domain; IPR001480 Bulb-type lectin domain; IPR008271 Serine/threonine-protein kinase, active site; IPR003609 PAN/Apple domain; IPR013320 Concanavalin A-like lectin/glucanase domain; IPR011009 Protein kinase-like domain; IPR000719 Protein kinase domain; IPR000858 S-locus glycoprotein domain; IPR024171 S-receptor-like serine/thre…	GO:0004672 protein kinase activity; GO:0005524 ATP binding; GO:0006468 protein phosphorylation;	gi|659072776|ref|XP_008467083.1| PREDICTED: G-type lectin S-receptor-like serine/threonine-protein kinase At1g34300 [Cucumis melo]	AT1G34300.1 | Symbols: | lectin protein kinase family protein | chr1:12503450-12505939 FORWARD LENGTH=829	sp|Q9XID3|Y1343_ARATH G-type lectin S-receptor-like serine/threonine-protein kinase At1g34300 OS=Arabidopsis thaliana GN=At1g34300 PE=2 SV=1	0.226467
Bhi09G002395	green	chr9	IPR011614 Catalase core domain; IPR024708 Catalase active site; IPR020835 Catalase-like domain; IPR010582 Catalase immune-responsive domain; IPR018028 Catalase, mono-functional, haem-containing; IPR002226 Catalase haem-binding site; IPR024711 Catalase, mono-functional, haem-containing, clades 1 and 3	GO:0004096 catalase activity; GO:0020037 heme binding; GO:0055114 oxidation-reduction process;	gi|778697155|ref|XP_011654267.1| PREDICTED: catalase isozyme 1 [Cucumis sativus] >gi|700200341|gb|KGN55499.1| hypothetical protein Csa_4G658590 [Cucumis sativus]	AT4G35090.1 | Symbols: CAT2 | catalase 2 | chr4:16700937-16703215 REVERSE LENGTH=492	sp|P48350|CATA1_CUCPE Catalase isozyme 1 OS=Cucurbita pepo GN=CAT1 PE=2 SV=1	0.22239
Bhi01G001407	blue	chr1	-	-	-	-	-	0.221815
Bhi05G000767	turquoise	chr5	IPR000868 Isochorismatase-like	GO:0003824 catalytic activity; GO:0008152 metabolic process;	gi|449438220|ref|XP_004136887.1| PREDICTED: nicotinamidase 1-like [Cucumis sativus] >gi|700188519|gb|KGN43752.1| hypothetical protein Csa_7G065110 [Cucumis sativus]	AT2G22570.1 | Symbols: ATNIC1, NIC1 | nicotinamidase 1 | chr2:9589604-9590846 REVERSE LENGTH=244	sp|Q8S8F9|NIC1_ARATH Nicotinamidase 1 OS=Arabidopsis thaliana GN=NIC1 PE=1 SV=1	0.221268
Bhi01G000797	turquoise	chr1	IPR009057 Homeodomain-like; IPR001005 SANT/Myb domain; IPR017930 Myb domain	GO:0003677 DNA binding;	gi|778679114|ref|XP_011651090.1| PREDICTED: transcription factor MYB108 [Cucumis sativus] >gi|700202050|gb|KGN57183.1| hypothetical protein Csa_3G168940 [Cucumis sativus]	AT5G49620.1 | Symbols: AtMYB78, MYB78 | myb domain protein 78 | chr5:20137491-20139384 REVERSE LENGTH=307	sp|Q9LDE1|MY108_ARATH Transcription factor MYB108 OS=Arabidopsis thaliana GN=MYB108 PE=1 SV=1	0.216905
Bhi10G000952	green	chr10	IPR003441 NAC domain	GO:0003677 DNA binding; GO:0006355 regulation of transcription, DNA-templated;	gi|659094950|ref|XP_008448321.1| PREDICTED: LOW QUALITY PROTEIN: NAC transcription factor 29-like [Cucumis melo]	AT2G17040.1 | Symbols: anac036, NAC036 | NAC domain containing protein 36 | chr2:7407123-7408120 FORWARD LENGTH=276	sp|Q9ZVP8|NAC35_ARATH NAC domain-containing protein 35 OS=Arabidopsis thaliana GN=NAC035 PE=1 SV=2	0.215145
Bhi10G000317	turquoise	chr10	IPR010255 Haem peroxidase; IPR019794 Peroxidase, active site; IPR000823 Plant peroxidase; IPR019793 Peroxidases heam-ligand binding site; IPR002016 Haem peroxidase, plant/fungal/bacterial	GO:0004601 peroxidase activity; GO:0006979 response to oxidative stress; GO:0020037 heme binding; GO:0055114 oxidation-reduction process;	gi|1035406437|ref|XP_008449772.2| PREDICTED: peroxidase 2-like [Cucumis melo]	AT5G06720.1 | Symbols: ATPA2, PA2 | peroxidase 2 | chr5:2077567-2078857 REVERSE LENGTH=335	sp|Q42578|PER53_ARATH Peroxidase 53 OS=Arabidopsis thaliana GN=PER53 PE=1 SV=1	0.213586
Bhi01G001890	green	chr1	IPR002401 Cytochrome P450, E-class, group I; IPR001128 Cytochrome P450	GO:0005506 iron ion binding; GO:0016705 oxidoreductase activity, acting on paired donors, with incorporation or reduction of molecular oxygen; GO:0020037 heme binding; GO:0055114 oxidation-reduction process;	gi|659107559|ref|XP_008453737.1| PREDICTED: cytochrome P450 90B1 [Cucumis melo]	AT3G50660.1 | Symbols: DWF4, CYP90B1, CLM, SNP2, SAV1, PSC1 | Cytochrome P450 superfamily protein | chr3:18814262-18817168 REVERSE LENGTH=513	sp|O64989|C90B1_ARATH Cytochrome P450 90B1 OS=Arabidopsis thaliana GN=CYP90B1 PE=1 SV=2	0.210146
Bhi10G001091	yellow	chr10	IPR005150 Cellulose synthase; IPR029044 Nucleotide-diphospho-sugar transferases	GO:0016020 membrane; GO:0016760 cellulose synthase (UDP-forming) activity; GO:0030244 cellulose biosynthetic process;	gi|659111800|ref|XP_008455913.1| PREDICTED: cellulose synthase-like protein H1 [Cucumis melo]	AT2G32530.1 | Symbols: ATCSLB03, CSLB03, ATCSLB3 | cellulose synthase-like B3 | chr2:13809283-13813487 FORWARD LENGTH=755	sp|Q339N5|CSLH1_ORYSJ Cellulose synthase-like protein H1 OS=Oryza sativa subsp. japonica GN=CSLH1 PE=2 SV=2	0.210138
Bhi08G000519	brown	chr8	IPR012946 X8 domain; IPR000490 Glycoside hydrolase family 17; IPR017853 Glycoside hydrolase superfamily; IPR013781 Glycoside hydrolase, catalytic domain	-	gi|778661465|ref|XP_011658156.1| PREDICTED: glucan endo-1,3-beta-glucosidase [Cucumis sativus] >gi|700210627|gb|KGN65723.1| Glucan endo-1,3-beta-glucosidase [Cucumis sativus]	AT5G24318.1 | Symbols: | O-Glycosyl hydrolases family 17 protein | chr5:8282285-8283956 REVERSE LENGTH=458	sp|P52409|E13B_WHEAT Glucan endo-1,3-beta-glucosidase OS=Triticum aestivum GN=GLC1 PE=2 SV=1	0.209849
Bhi07G000777	turquoise	chr7	IPR004000 Actin family; IPR020902 Actin/actin-like conserved site; IPR004001 Actin, conserved site	-	gi|449459916|ref|XP_004147692.1| PREDICTED: actin-97-like [Cucumis sativus] >gi|659123435|ref|XP_008461663.1| PREDICTED: actin-97-like [Cucumis melo] >gi|659123437|ref|XP_008461664.1| PREDICTED: actin-97-like [Cucumis melo]	AT3G12110.1 | Symbols: ACT11 | actin-11 | chr3:3858116-3859609 FORWARD LENGTH=377	sp|P30171|ACT11_SOLTU Actin-97 OS=Solanum tuberosum GN=AC97 PE=3 SV=1	0.209518
Bhi12G002022	blue	chr12	IPR000719 Protein kinase domain; IPR011009 Protein kinase-like domain; IPR018451 NAF/FISL domain; IPR017441 Protein kinase, ATP binding site; IPR002290 Serine/threonine/dual specificity protein kinase, catalytic domain; IPR008271 Serine/threonine-protein kinase, active site; IPR004041 NAF domain	GO:0004672 protein kinase activity; GO:0005524 ATP binding; GO:0006468 protein phosphorylation;	gi|659096798|ref|XP_008449293.1| PREDICTED: CBL-interacting serine/threonine-protein kinase 7-like [Cucumis melo]	AT3G23000.1 | Symbols: CIPK7, SnRK3.10, PKS7, ATSRPK1, ATSR2 | CBL-interacting protein kinase 7 | chr3:8172654-8173943 FORWARD LENGTH=429	sp|Q9XIW0|CIPK7_ARATH CBL-interacting serine/threonine-protein kinase 7 OS=Arabidopsis thaliana GN=CIPK7 PE=1 SV=1	0.20925
BhiUN533G20	brown	Contig533	IPR005123 Oxoglutarate/iron-dependent dioxygenase; IPR026992 Non-haem dioxygenase N-terminal domain; IPR027443 Isopenicillin N synthase-like	GO:0016491 oxidoreductase activity; GO:0055114 oxidation-reduction process;	gi|449432578|ref|XP_004134076.1| PREDICTED: 1-aminocyclopropane-1-carboxylate oxidase homolog 1-like [Cucumis sativus] >gi|700201744|gb|KGN56877.1| hypothetical protein Csa_3G135740 [Cucumis sativus]	AT1G06620.1 | Symbols: | 2-oxoglutarate (2OG) and Fe(II)-dependent oxygenase superfamily protein | chr1:2025618-2027094 FORWARD LENGTH=365	sp|Q84MB3|ACCH1_ARATH 1-aminocyclopropane-1-carboxylate oxidase homolog 1 OS=Arabidopsis thaliana GN=At1g06620 PE=2 SV=1	0.207548
Bhi10G001303	turquoise	chr10	IPR017972 Cytochrome P450, conserved site; IPR001128 Cytochrome P450; IPR002401 Cytochrome P450, E-class, group I	GO:0016705 oxidoreductase activity, acting on paired donors, with incorporation or reduction of molecular oxygen; GO:0055114 oxidation-reduction process;	gi|778673857|ref|XP_011650076.1| PREDICTED: cytochrome P450 89A2-like [Cucumis sativus]	AT1G64940.1 | Symbols: CYP89A6 | cytochrome P450, family 87, subfamily A, polypeptide 6 | chr1:24123789-24125324 FORWARD LENGTH=511	sp|Q42602|C89A2_ARATH Cytochrome P450 89A2 OS=Arabidopsis thaliana GN=CYP89A2 PE=2 SV=2	0.204882
Bhi06G000015	brown	chr6	IPR004158 Protein of unknown function DUF247, plant	-	gi|659119410|ref|XP_008459642.1| PREDICTED: putative UPF0481 protein At3g02645 [Cucumis melo]	AT3G02645.1 | Symbols: | Plant protein of unknown function (DUF247) | chr3:566271-567860 FORWARD LENGTH=529	sp|P0C897|Y3264_ARATH Putative UPF0481 protein At3g02645 OS=Arabidopsis thaliana GN=At3g02645 PE=3 SV=1	0.204082
Bhi09G000778	turquoise	chr9	IPR029044 Nucleotide-diphospho-sugar transferases; IPR002495 Glycosyl transferase, family 8	-	gi|659101270|ref|XP_008451519.1| PREDICTED: probable galacturonosyltransferase-like 7 [Cucumis melo]	AT3G62660.1 | Symbols: GATL7 | galacturonosyltransferase-like 7 | chr3:23173419-23174504 FORWARD LENGTH=361	sp|Q8VYF4|GATL7_ARATH Probable galacturonosyltransferase-like 7 OS=Arabidopsis thaliana GN=GATL7 PE=2 SV=1	0.202968
Bhi01G000395	red	chr1	IPR001356 Homeobox domain; IPR003106 Leucine zipper, homeobox-associated; IPR009057 Homeodomain-like; IPR000047 Helix-turn-helix motif; IPR017970 Homeobox, conserved site	GO:0003677 DNA binding;	gi|449432008|ref|XP_004133792.1| PREDICTED: homeobox-leucine zipper protein ATHB-12 [Cucumis sativus] >gi|700201257|gb|KGN56390.1| hypothetical protein Csa_3G119240 [Cucumis sativus]	AT2G46680.1 | Symbols: ATHB-7, ATHB7, HB-7 | homeobox 7 | chr2:19165777-19166773 REVERSE LENGTH=258	sp|P46897|ATHB7_ARATH Homeobox-leucine zipper protein ATHB-7 OS=Arabidopsis thaliana GN=ATHB-7 PE=1 SV=2	0.200747
Bhi09G002201	turquoise	chr9	IPR007650 Zf-FLZ domain	-	gi|449465613|ref|XP_004150522.1| PREDICTED: uncharacterized protein LOC101206644 [Cucumis sativus] >gi|700199460|gb|KGN54618.1| hypothetical protein Csa_4G378780 [Cucumis sativus]	AT1G78020.1 | Symbols: | Protein of unknown function (DUF581) | chr1:29338787-29339491 FORWARD LENGTH=162	sp|Q8LGS1|MARD1_ARATH Protein MARD1 OS=Arabidopsis thaliana GN=MARD1 PE=2 SV=2	0.199613
Bhi05G001756	blue	chr5	IPR002290 Serine/threonine/dual specificity protein kinase, catalytic domain; IPR008271 Serine/threonine-protein kinase, active site; IPR011009 Protein kinase-like domain; IPR017441 Protein kinase, ATP binding site; IPR000719 Protein kinase domain	GO:0004672 protein kinase activity; GO:0005524 ATP binding; GO:0006468 protein phosphorylation;	gi|659092580|ref|XP_008447130.1| PREDICTED: probable receptor-like protein kinase At2g42960 [Cucumis melo] >gi|659092582|ref|XP_008447131.1| PREDICTED: probable receptor-like protein kinase At2g42960 [Cucumis melo]	AT3G59110.1 | Symbols: | Protein kinase superfamily protein | chr3:21855673-21857847 FORWARD LENGTH=512	sp|Q9SJG2|Y2296_ARATH Probable receptor-like protein kinase At2g42960 OS=Arabidopsis thaliana GN=At2g42960 PE=3 SV=1	0.197143
Bhi07G000444	turquoise	chr7	IPR013057 Amino acid transporter, transmembrane domain	-	gi|659114097|ref|XP_008456903.1| PREDICTED: sodium-coupled neutral amino acid transporter 2-like [Cucumis melo]	AT3G56200.1 | Symbols: | Transmembrane amino acid transporter family protein | chr3:20850087-20851779 FORWARD LENGTH=435	sp|Q5SPB1|S38A2_DANRE Sodium-coupled neutral amino acid transporter 2 OS=Danio rerio GN=slc38a2 PE=3 SV=1	0.196528
Bhi10G001143	blue	chr10	-	-	gi|1009176138|ref|XP_015869270.1| PREDICTED: uncharacterized protein LOC107406644 [Ziziphus jujuba]	AT2G07599.2 | Symbols: | unknown protein; BEST Arabidopsis thaliana protein match is: unknown protein (TAIR:ATMG01040.1). | chr2:3348848-3351073 REVERSE LENGTH=346	-	0.19649
Bhi07G001085	black	chr7	IPR012438 Protein of unknown function DUF1639	-	gi|659091563|ref|XP_008446612.1| PREDICTED: uncharacterized protein LOC103489295 [Cucumis melo]	AT1G25370.1 | Symbols: | Protein of unknown function (DUF1639) | chr1:8898046-8898934 REVERSE LENGTH=263	-	0.194143
Bhi12G001738	turquoise	chr12	IPR003657 WRKY domain	GO:0003700 transcription factor activity, sequence-specific DNA binding; GO:0006355 regulation of transcription, DNA-templated; GO:0043565 sequence-specific DNA binding;	gi|659134196|ref|XP_008467077.1| PREDICTED: LOW QUALITY PROTEIN: probable WRKY transcription factor 48 [Cucumis melo]	AT2G47260.1 | Symbols: WRKY23, ATWRKY23 | WRKY DNA-binding protein 23 | chr2:19405045-19406446 REVERSE LENGTH=337	sp|O22900|WRK23_ARATH Probable WRKY transcription factor 23 OS=Arabidopsis thaliana GN=WRKY23 PE=2 SV=1	0.193453
Bhi11G001598	red	chr11	IPR018316 Tubulin/FtsZ, 2-layer sandwich domain; IPR023123 Tubulin, C-terminal; IPR003008 Tubulin/FtsZ, GTPase domain; IPR013838 Beta tubulin, autoregulation binding site; IPR000217 Tubulin; IPR002453 Beta tubulin; IPR017975 Tubulin, conserved site; IPR008280 Tubulin/FtsZ, C-terminal	-	gi|659083681|ref|XP_008442483.1| PREDICTED: tubulin beta chain-like [Cucumis melo]	AT5G62700.1 | Symbols: TUB3 | tubulin beta chain 3 | chr5:25184501-25186426 FORWARD LENGTH=450	sp|P18025|TBB1_MAIZE Tubulin beta-1 chain OS=Zea mays GN=TUBB1 PE=2 SV=1	0.193377
Bhi03G002023	green	chr3	IPR008889 VQ	-	gi|659111355|ref|XP_008455708.1| PREDICTED: sigma factor binding protein 2, chloroplastic [Cucumis melo]	AT3G56710.1 | Symbols: SIB1 | sigma factor binding protein 1 | chr3:21007053-21007508 REVERSE LENGTH=151	sp|Q9LDH1|SIB1_ARATH Sigma factor binding protein 1, chloroplastic OS=Arabidopsis thaliana GN=SIB1 PE=1 SV=1	0.193338
Bhi04G000007	blue	chr4	IPR027923 Hydrophobic seed protein; IPR016140 Bifunctional inhibitor/plant lipid transfer protein/seed storage helical domain	-	gi|659088926|ref|XP_008445235.1| PREDICTED: pEARLI1-like lipid transfer protein 1 [Cucumis melo]	AT2G45180.1 | Symbols: | Bifunctional inhibitor/lipid-transfer protein/seed storage 2S albumin superfamily protein | chr2:18626377-18626781 FORWARD LENGTH=134	sp|P14009|14KD_DAUCA 14 kDa proline-rich protein DC2.15 OS=Daucus carota PE=2 SV=1	0.18998
Bhi05G001639	red	chr5	IPR001387 Cro/C1-type helix-turn-helix domain; IPR010982 Lambda repressor-like, DNA-binding domain; IPR013729 Multiprotein bridging factor 1, N-terminal	GO:0043565 sequence-specific DNA binding;	gi|1219095199|ref|XP_021773836.1| multiprotein-bridging factor 1a-like [Chenopodium quinoa]	AT3G58680.1 | Symbols: MBF1B, ATMBF1B | multiprotein bridging factor 1B | chr3:21707367-21708625 FORWARD LENGTH=142	sp|Q9LXT3|MBF1B_ARATH Multiprotein-bridging factor 1b OS=Arabidopsis thaliana GN=MBF1B PE=2 SV=1	0.187337
Bhi05G001813	brown	chr5	IPR020575 Heat shock protein Hsp90, N-terminal; IPR003594 Histidine kinase-like ATPase, C-terminal domain; IPR001404 Heat shock protein Hsp90 family; IPR019805 Heat shock protein Hsp90, conserved site; IPR020568 Ribosomal protein S5 domain 2-type fold	-	gi|659077593|ref|XP_008439282.1| PREDICTED: heat shock protein 83 [Cucumis melo]	AT5G52640.1 | Symbols: HSP81-1, ATHS83, HSP81.1, HSP83, ATHSP90.1, AtHsp90-1, HSP90.1 | heat shock protein 90.1 | chr5:21352542-21355147 FORWARD LENGTH=705	sp|P51819|HSP83_IPONI Heat shock protein 83 OS=Ipomoea nil GN=HSP83A PE=2 SV=1	0.186893
Bhi09G001481	yellow	chr9	IPR000782 FAS1 domain	-	gi|659126082|ref|XP_008463001.1| PREDICTED: fasciclin-like arabinogalactan protein 1 [Cucumis melo]	AT5G55730.2 | Symbols: FLA1 | FASCICLIN-like arabinogalactan 1 | chr5:22558375-22560392 REVERSE LENGTH=424	sp|Q9FM65|FLA1_ARATH Fasciclin-like arabinogalactan protein 1 OS=Arabidopsis thaliana GN=FLA1 PE=1 SV=1	0.186866
Bhi01G001408	black	chr1	-	-	-	-	-	0.185763
Bhi01G001531	black	chr1	IPR009856 Light regulated Lir1	-	gi|1035406780|ref|XP_008450019.2| PREDICTED: light-regulated protein isoform X2 [Cucumis melo]	AT3G26740.1 | Symbols: CCL | CCR-like | chr3:9827868-9828461 FORWARD LENGTH=141	sp|Q03200|LIRP1_ORYSJ Light-regulated protein OS=Oryza sativa subsp. japonica GN=LIR1 PE=2 SV=1	0.183558
Bhi04G001863	turquoise	chr4	-	-	gi|700190608|gb|KGN45812.1| Poly(A)-binding protein C-terminal interacting protein 6 [Cucumis sativus]	AT2G41430.5 | Symbols: ERD15 | dehydration-induced protein (ERD15) | chr2:17269736-17270314 FORWARD LENGTH=163	sp|Q39096|ERD15_ARATH Protein EARLY RESPONSIVE TO DEHYDRATION 15 OS=Arabidopsis thaliana GN=ERD15 PE=1 SV=1	0.183444
BhiUN395G14	turquoise	Contig395	IPR001471 AP2/ERF domain; IPR016177 DNA-binding domain	GO:0003700 transcription factor activity, sequence-specific DNA binding; GO:0006355 regulation of transcription, DNA-templated;	gi|659073281|ref|XP_008436978.1| PREDICTED: ethylene-responsive transcription factor ERF106-like [Cucumis melo]	AT5G07580.1 | Symbols: | Integrase-type DNA-binding superfamily protein | chr5:2399525-2400349 FORWARD LENGTH=274	sp|Q9LY05|EF106_ARATH Ethylene-responsive transcription factor ERF106 OS=Arabidopsis thaliana GN=ERF106 PE=2 SV=1	0.182596
Bhi02G000633	green	chr2	IPR021940 Uncharacterised domain Wax2, C-terminal; IPR016040 NAD(P)-binding domain; IPR006694 Fatty acid hydroxylase	-	gi|449464324|ref|XP_004149879.1| PREDICTED: protein ECERIFERUM 3 [Cucumis sativus] >gi|700210175|gb|KGN65271.1| hypothetical protein Csa_1G294020 [Cucumis sativus]	AT5G57800.1 | Symbols: FLP1, YRE, CER3, WAX2 | Fatty acid hydroxylase superfamily | chr5:23420589-23423832 FORWARD LENGTH=632	sp|Q8H1Z0|CER3_ARATH Protein ECERIFERUM 3 OS=Arabidopsis thaliana GN=CER3 PE=1 SV=1	0.181129
Bhi03G000678	blue	chr3	IPR013781 Glycoside hydrolase, catalytic domain; IPR019801 Glycoside hydrolase, family 35, conserved site; IPR031330 Glycoside hydrolase 35, catalytic domain; IPR001944 Glycoside hydrolase, family 35; IPR008979 Galactose-binding domain-like; IPR017853 Glycoside hydrolase superfamily; IPR000922 D-galactoside/L-rhamnose binding SUEL lectin domain	GO:0005975 carbohydrate metabolic process;	gi|659080414|ref|XP_008440778.1| PREDICTED: beta-galactosidase 3 [Cucumis melo]	AT4G36360.1 | Symbols: BGAL3 | beta-galactosidase 3 | chr4:17176840-17181143 REVERSE LENGTH=856	sp|Q9SCV9|BGAL3_ARATH Beta-galactosidase 3 OS=Arabidopsis thaliana GN=BGAL3 PE=2 SV=1	0.179388
Bhi01G001098	turquoise	chr1	IPR015655 Protein phosphatase 2C family; IPR001932 PPM-type phosphatase domain; IPR000222 PPM-type phosphatase, divalent cation binding	GO:0004722 protein serine/threonine phosphatase activity; GO:0006470 protein dephosphorylation;	gi|659082002|ref|XP_008441614.1| PREDICTED: probable protein phosphatase 2C 8 [Cucumis melo]	AT2G29380.1 | Symbols: HAI3 | highly ABA-induced PP2C gene 3 | chr2:12608855-12610124 FORWARD LENGTH=362	sp|Q5SN75|P2C08_ORYSJ Probable protein phosphatase 2C 8 OS=Oryza sativa subsp. japonica GN=Os01g0656200 PE=2 SV=1	0.17853
Bhi11G000945	yellow	chr11	IPR011052 Proteinase/amylase inhibitor domain	GO:0004866 endopeptidase inhibitor activity;	gi|700197605|gb|KGN52763.1| hypothetical protein Csa_4G000830 [Cucumis sativus]	-	-	0.177999
Bhi11G000921	blue	chr11	IPR006671 Cyclin, N-terminal; IPR013763 Cyclin-like; IPR004367 Cyclin, C-terminal domain	-	gi|659108835|ref|XP_008454410.1| PREDICTED: cyclin-D4-2-like [Cucumis melo] >gi|307135950|gb|ADN33810.1| cyclin d protein [Cucumis melo subsp. melo]	AT1G70210.1 | Symbols: CYCD1;1, ATCYCD1;1 | CYCLIN D1;1 | chr1:26440015-26441980 FORWARD LENGTH=339	sp|Q8LHA8|CCD22_ORYSJ Cyclin-D2-2 OS=Oryza sativa subsp. japonica GN=CYCD2-2 PE=2 SV=1	0.176404
Bhi07G001072	turquoise	chr7	IPR013210 Leucine-rich repeat-containing N-terminal, plant-type; IPR000719 Protein kinase domain; IPR001611 Leucine-rich repeat; IPR011009 Protein kinase-like domain; IPR032675 Leucine-rich repeat domain, L domain-like; IPR003591 Leucine-rich repeat, typical subtype	-	gi|659091611|ref|XP_008446637.1| PREDICTED: probable inactive leucine-rich repeat receptor-like protein kinase At1g66830 [Cucumis melo]	AT2G01210.1 | Symbols: | Leucine-rich repeat protein kinase family protein | chr2:119509-121734 REVERSE LENGTH=716	sp|Q9ZU46|ZAR1_ARATH Receptor protein kinase-like protein ZAR1 OS=Arabidopsis thaliana GN=ZAR1 PE=1 SV=1	0.176286
Bhi04G000425	brown	chr4	IPR013698 Squalene epoxidase; IPR023753 FAD/NAD(P)-binding domain	GO:0004506 squalene monooxygenase activity; GO:0016021 integral component of membrane; GO:0050660 flavin adenine dinucleotide binding; GO:0055114 oxidation-reduction process;	gi|449450312|ref|XP_004142907.1| PREDICTED: squalene monooxygenase [Cucumis sativus] >gi|700207301|gb|KGN62420.1| Squalene epoxidase [Cucumis sativus]	AT1G58440.1 | Symbols: XF1, SQE1 | FAD/NAD(P)-binding oxidoreductase family protein | chr1:21714094-21717246 REVERSE LENGTH=531	sp|O48651|ERG1_PANGI Squalene monooxygenase OS=Panax ginseng PE=2 SV=1	0.174251
Bhi09G002962	turquoise	chr9	-	-	-	-	-	0.173589
Bhi03G001502	brown	chr3	IPR000210 BTB/POZ domain; IPR027356 NPH3 domain; IPR011333 SKP1/BTB/POZ domain	GO:0005515 protein binding;	gi|449448382|ref|XP_004141945.1| PREDICTED: BTB/POZ domain-containing protein At5g66560 [Cucumis sativus] >gi|700193262|gb|KGN48466.1| hypothetical protein Csa_6G488360 [Cucumis sativus]	AT5G66560.1 | Symbols: | Phototropic-responsive NPH3 family protein | chr5:26564368-26566662 FORWARD LENGTH=668	sp|Q94A73|Y5656_ARATH BTB/POZ domain-containing protein At5g66560 OS=Arabidopsis thaliana GN=At5g66560 PE=2 SV=2	0.172658
Bhi12G000580	turquoise	chr12	IPR002579 Peptide methionine sulphoxide reductase MrsB; IPR004910 Yippee/Mis18	GO:0033743 peptide-methionine (R)-S-oxide reductase activity; GO:0055114 oxidation-reduction process;	gi|449456413|ref|XP_004145944.1| PREDICTED: protein yippee-like At4g27740 [Cucumis sativus] >gi|700194670|gb|KGN49847.1| hypothetical protein Csa_5G139250 [Cucumis sativus]	AT4G27740.1 | Symbols: | Yippee family putative zinc-binding protein | chr4:13839148-13839616 FORWARD LENGTH=105	sp|Q2V3E2|YIPL5_ARATH Protein yippee-like At4g27740 OS=Arabidopsis thaliana GN=At4g27740 PE=3 SV=1	0.171858
Bhi08G001508	yellow	chr8	IPR002016 Haem peroxidase, plant/fungal/bacterial; IPR010255 Haem peroxidase; IPR000823 Plant peroxidase	GO:0004601 peroxidase activity; GO:0006979 response to oxidative stress; GO:0020037 heme binding; GO:0055114 oxidation-reduction process;	gi|659067744|ref|XP_008441087.1| PREDICTED: peroxidase 42 [Cucumis melo] >gi|307136213|gb|ADN34050.1| peroxidase [Cucumis melo subsp. melo]	AT4G21960.1 | Symbols: PRXR1 | Peroxidase superfamily protein | chr4:11646613-11648312 REVERSE LENGTH=330	sp|Q9SB81|PER42_ARATH Peroxidase 42 OS=Arabidopsis thaliana GN=PER42 PE=1 SV=2	0.171397
Bhi05G001634	green	chr5	IPR006936 ALOG domain	-	gi|659110586|ref|XP_008455303.1| PREDICTED: protein LIGHT-DEPENDENT SHORT HYPOCOTYLS 10 [Cucumis melo]	AT2G42610.2 | Symbols: LSH10 | Protein of unknown function (DUF640) | chr2:17748005-17748538 FORWARD LENGTH=177	sp|Q9S7R3|LSH10_ARATH Protein LIGHT-DEPENDENT SHORT HYPOCOTYLS 10 OS=Arabidopsis thaliana GN=LSH10 PE=1 SV=1	0.171337
Bhi06G000344	blue	chr6	IPR003439 ABC transporter-like; IPR027417 P-loop containing nucleoside triphosphate hydrolase; IPR011527 ABC transporter type 1, transmembrane domain; IPR003593 AAA+ ATPase domain; IPR017871 ABC transporter, conserved site	GO:0005524 ATP binding; GO:0016887 ATPase activity;	gi|659118790|ref|XP_008459308.1| PREDICTED: ABC transporter B family member 19 [Cucumis melo]	AT3G28860.1 | Symbols: ATMDR1, ATMDR11, PGP19, MDR11, MDR1, ATPGP19, ABCB19, ATABCB19 | ATP binding cassette subfamily B19 | chr3:10870287-10877286 REVERSE LENGTH=1252	sp|Q9LJX0|AB19B_ARATH ABC transporter B family member 19 OS=Arabidopsis thaliana GN=ABCB19 PE=1 SV=1	0.171222
Bhi09G000794	brown	chr9	IPR012336 Thioredoxin-like fold; IPR011679 Endoplasmic reticulum, protein ERp29, C-terminal; IPR013766 Thioredoxin domain; IPR017937 Thioredoxin, conserved site; IPR005788 Disulphide isomerase	-	gi|659101248|ref|XP_008451506.1| PREDICTED: probable protein disulfide-isomerase A6 [Cucumis melo]	AT2G47470.1 | Symbols: ATPDIL2-1, UNE5, MEE30, PDI11, ATPDI11 | thioredoxin family protein | chr2:19481503-19483683 FORWARD LENGTH=361	sp|P38661|PDIA6_MEDSA Probable protein disulfide-isomerase A6 OS=Medicago sativa PE=2 SV=1	0.17118
Bhi09G000236	brown	chr9	IPR018467 CO/COL/TOC1, conserved site; IPR010399 Tify domain	-	gi|449447924|ref|XP_004141716.1| PREDICTED: protein TIFY 10B-like [Cucumis sativus] >gi|700190237|gb|KGN45470.1| hypothetical protein Csa_7G448810 [Cucumis sativus]	AT1G74950.1 | Symbols: JAZ2, TIFY10B | TIFY domain/Divergent CCT motif family protein | chr1:28148919-28150258 REVERSE LENGTH=249	sp|Q9S7M2|TI10B_ARATH Protein TIFY 10B OS=Arabidopsis thaliana GN=TIFY10B PE=1 SV=1	0.170786
Bhi11G001401	brown	chr11	IPR015892 Carbonic anhydrase, prokaryotic-like, conserved site; IPR001765 Carbonic anhydrase	GO:0004089 carbonate dehydratase activity; GO:0008270 zinc ion binding; GO:0015976 carbon utilization;	gi|659085631|ref|XP_008443519.1| PREDICTED: carbonic anhydrase 2-like isoform X1 [Cucumis melo]	AT3G01500.2 | Symbols: CA1 | carbonic anhydrase 1 | chr3:194853-197873 REVERSE LENGTH=347	sp|P17067|CAHC_PEA Carbonic anhydrase, chloroplastic OS=Pisum sativum PE=1 SV=1	0.170471
Bhi02G001555	red	chr2	IPR008480 Protein of unknown function DUF761, plant; IPR025520 Domain of unknown function DUF4408	-	gi|1035407661|ref|XP_016900958.1| PREDICTED: uncharacterized protein LOC107991122 [Cucumis melo]	AT4G26130.1 | Symbols: | unknown protein; FUNCTIONS IN: molecular_function unknown; INVOLVED IN: biological_process unknown; LOCATED IN: endomembrane system; EXPRESSED IN: 23 plant structures; EXPRESSED DURING: 13 growth stages; BEST Arabidopsis thaliana protein match is: unknown protein (TAIR:AT5G56980.1); Has 121 Blast hits to 116 proteins in 19 species: Archae - 0; Bacteria - 0; Metazoa - 4; F…	-	0.168804
Bhi11G000941	blue	chr11	IPR000737 Proteinase inhibitor I7, squash; IPR011052 Proteinase/amylase inhibitor domain	GO:0004867 serine-type endopeptidase inhibitor activity;	gi|8134511|sp|Q43667|ITR1_TRIKI RecName: Full=Trypsin inhibitor 1; AltName: Full=TTII; AltName: Full=Trypsin inhibitor I; Flags: Precursor >gi|559530|emb|CAA57704.1| Trichosanthes trypsin inhibitor-I [Trichosanthes kirilowii]	-	sp|Q43667|ITR1_TRIKI Trypsin inhibitor 1 OS=Trichosanthes kirilowii PE=3 SV=1	0.165313
Bhi01G002081	blue	chr1	IPR032675 Leucine-rich repeat domain, L domain-like; IPR002182 NB-ARC; IPR027417 P-loop containing nucleoside triphosphate hydrolase	-	gi|449445363|ref|XP_004140442.1| PREDICTED: disease resistance protein RGA2-like [Cucumis sativus] >gi|700195634|gb|KGN50811.1| hypothetical protein Csa_5G266890 [Cucumis sativus]	AT3G14470.1 | Symbols: | NB-ARC domain-containing disease resistance protein | chr3:4857940-4861104 FORWARD LENGTH=1054	sp|Q7XBQ9|RGA2_SOLBU Disease resistance protein RGA2 OS=Solanum bulbocastanum GN=RGA2 PE=1 SV=1	0.163157
Bhi10G000585	turquoise	chr10	IPR012552 DVL	-	gi|659115242|ref|XP_008457457.1| PREDICTED: uncharacterized protein LOC103497141 [Cucumis melo] >gi|1035415591|ref|XP_016902125.1| PREDICTED: uncharacterized protein LOC103497141 [Cucumis melo]	AT5G59510.1 | Symbols: RTFL5, DVL18 | ROTUNDIFOLIA like 5 | chr5:23990089-23990523 FORWARD LENGTH=144	-	0.162299
Bhi06G001393	red	chr6	IPR027988 Transcription factor BREVIS RADIX, N-terminal domain; IPR013591 Brevis radix (BRX) domain	-	gi|1035391030|ref|XP_016901942.1| PREDICTED: protein Brevis radix-like 4 isoform X1 [Cucumis melo] >gi|1035391032|ref|XP_016901945.1| PREDICTED: protein Brevis radix-like 4 isoform X1 [Cucumis melo]	AT5G20540.1 | Symbols: ATBRXL4, BRX-LIKE4, BRXL4 | BREVIS RADIX-like 4 | chr5:6947943-6951760 FORWARD LENGTH=384	sp|Q8GZ92|BRXL4_ARATH Protein Brevis radix-like 4 OS=Arabidopsis thaliana GN=BRXL4 PE=2 SV=1	0.16226
Bhi11G002410	red	chr11	IPR003245 Phytocyanin domain; IPR008972 Cupredoxin	GO:0009055 electron carrier activity;	gi|659085323|ref|XP_008443359.1| PREDICTED: lamin-like protein [Cucumis melo]	AT5G15350.1 | Symbols: ENODL17, AtENODL17 | early nodulin-like protein 17 | chr5:4985184-4986154 REVERSE LENGTH=172	sp|Q39131|LAML_ARATH Lamin-like protein OS=Arabidopsis thaliana GN=At5g15350 PE=1 SV=1	0.162243
Bhi08G000341	red	chr8	IPR012862 Protein of unknown function DUF1635	-	gi|659115391|ref|XP_008457534.1| PREDICTED: uncharacterized protein LOC103497200 [Cucumis melo]	AT2G28690.1 | Symbols: | Protein of unknown function (DUF1635) | chr2:12307140-12308477 REVERSE LENGTH=231	-	0.161726
Bhi09G002677	brown	chr9	-	-	gi|778696358|ref|XP_011654145.1| PREDICTED: acanthoscurrin-2 isoform X1 [Cucumis sativus] >gi|700200096|gb|KGN55254.1| hypothetical protein Csa_4G642350 [Cucumis sativus]	-	-	0.16151
Bhi02G001422	turquoise	chr2	IPR011706 Multicopper oxidase, type 2; IPR011707 Multicopper oxidase, type 3; IPR002355 Multicopper oxidase, copper-binding site; IPR008972 Cupredoxin; IPR001117 Multicopper oxidase, type 1; IPR017760 L-ascorbate oxidase, plants	GO:0005507 copper ion binding; GO:0016491 oxidoreductase activity; GO:0055114 oxidation-reduction process;	gi|661902949|ref|NP_001284441.1| L-ascorbate oxidase [Cucumis melo] >gi|7373353|gb|AAF35911.2|AF233594_1 ascorbate oxidase AO4 [Cucumis melo]	AT5G21105.1 | Symbols: | Plant L-ascorbate oxidase | chr5:7172727-7177409 FORWARD LENGTH=588	sp|P14133|ASO_CUCSA L-ascorbate oxidase OS=Cucumis sativus PE=1 SV=1	0.161433
Bhi11G001273	turquoise	chr11	IPR013320 Concanavalin A-like lectin/glucanase domain; IPR016455 Xyloglucan endotransglucosylase/hydrolase; IPR008264 Beta-glucanase; IPR008263 Glycoside hydrolase, family 16, active site; IPR000757 Glycoside hydrolase, family 16; IPR010713 Xyloglucan endo-transglycosylase, C-terminal	-	gi|449446793|ref|XP_004141155.1| PREDICTED: probable xyloglucan endotransglucosylase/hydrolase protein 5 [Cucumis sativus] >gi|480296313|emb|CCH26413.1| xyloglucan endotransglycosylase [Cucumis sativus] >gi|700204649|gb|KGN59782.1| hypothetical protein Csa_3G845490 [Cucumis sativus]	AT5G13870.1 | Symbols: EXGT-A4, XTH5 | xyloglucan endotransglucosylase/hydrolase 5 | chr5:4475089-4476217 REVERSE LENGTH=293	sp|Q8LNZ5|XTHB_PHAAN Probable xyloglucan endotransglucosylase/hydrolase protein B OS=Phaseolus angularis GN=XTHB PE=2 SV=1	0.160957
Bhi07G001074	yellow	chr7	IPR009606 Protein of unknown function DUF1218	-	gi|659091609|ref|XP_008446636.1| PREDICTED: uncharacterized protein LOC103489308 [Cucumis melo]	AT1G68220.1 | Symbols: | Protein of unknown function (DUF1218) | chr1:25570322-25571562 FORWARD LENGTH=201	-	0.159404
Bhi01G001911	turquoise	chr1	IPR001611 Leucine-rich repeat; IPR017441 Protein kinase, ATP binding site; IPR001245 Serine-threonine/tyrosine-protein kinase catalytic domain; IPR013210 Leucine-rich repeat-containing N-terminal, plant-type; IPR013320 Concanavalin A-like lectin/glucanase domain; IPR011009 Protein kinase-like domain; IPR008271 Serine/threonine-protein kinase, active site; IPR032675 Leucine-rich repeat domain, L d…	GO:0005515 protein binding;	gi|659107584|ref|XP_008453749.1| PREDICTED: somatic embryogenesis receptor kinase 2-like [Cucumis melo]	AT1G34210.1 | Symbols: SERK2, ATSERK2 | somatic embryogenesis receptor-like kinase 2 | chr1:12459078-12462752 FORWARD LENGTH=628	sp|Q9XIC7|SERK2_ARATH Somatic embryogenesis receptor kinase 2 OS=Arabidopsis thaliana GN=SERK2 PE=1 SV=1	0.157388
Bhi07G001331	blue	chr7	IPR001079 Galectin, carbohydrate recognition domain; IPR013320 Concanavalin A-like lectin/glucanase domain; IPR002659 Glycosyl transferase, family 31	GO:0030246 carbohydrate binding;	gi|659090947|ref|XP_008446287.1| PREDICTED: hydroxyproline O-galactosyltransferase GALT6 [Cucumis melo]	AT5G62620.1 | Symbols: | Galactosyltransferase family protein | chr5:25137136-25139764 FORWARD LENGTH=681	sp|Q9LV16|B3GTJ_ARATH Hydroxyproline O-galactosyltransferase GALT6 OS=Arabidopsis thaliana GN=GALT6 PE=2 SV=2	0.157336
Bhi03G000891	brown	chr3	IPR002480 DAHP synthetase, class II	GO:0003849 3-deoxy-7-phosphoheptulonate synthase activity; GO:0009073 aromatic amino acid family biosynthetic process;	gi|659080046|ref|XP_008440582.1| PREDICTED: phospho-2-dehydro-3-deoxyheptonate aldolase 2, chloroplastic [Cucumis melo]	AT4G39980.1 | Symbols: DHS1 | 3-deoxy-D-arabino-heptulosonate 7-phosphate synthase 1 | chr4:18539654-18541832 FORWARD LENGTH=525	sp|P27608|AROF_TOBAC Phospho-2-dehydro-3-deoxyheptonate aldolase 1, chloroplastic OS=Nicotiana tabacum GN=DHAPS-1 PE=2 SV=1	0.156723
Bhi11G000989	blue	chr11	-	-	gi|449469100|ref|XP_004152259.1| PREDICTED: uncharacterized protein LOC101208429 [Cucumis sativus] >gi|700197636|gb|KGN52794.1| hypothetical protein Csa_4G001610 [Cucumis sativus]	AT1G65900.1 | Symbols: | unknown protein; FUNCTIONS IN: molecular_function unknown; INVOLVED IN: biological_process unknown; LOCATED IN: endomembrane system; EXPRESSED IN: 21 plant structures; EXPRESSED DURING: 13 growth stages; Has 306 Blast hits to 306 proteins in 119 species: Archae - 19; Bacteria - 238; Metazoa - 0; Fungi - 0; Plants - 34; Viruses - 0; Other Eukaryotes - 15 (source: NCBI BLin…	-	0.156426
Bhi03G001737	turquoise	chr3	IPR021369 Protein of unknown function DUF2985; IPR006461 PLAC8 motif-containing protein	-	gi|659128536|ref|XP_008464250.1| PREDICTED: uncharacterized protein LOC103502180 isoform X1 [Cucumis melo] >gi|1035423144|ref|XP_016903162.1| PREDICTED: uncharacterized protein LOC103502180 isoform X1 [Cucumis melo]	AT5G05350.1 | Symbols: | PLAC8 family protein | chr5:1585757-1587337 FORWARD LENGTH=526	-	0.155736
Bhi05G000333	green	chr5	IPR001164 Arf GTPase activating protein	GO:0005096 GTPase activator activity;	gi|659132032|ref|XP_008465980.1| PREDICTED: probable ADP-ribosylation factor GTPase-activating protein AGD9 [Cucumis melo]	AT5G46750.1 | Symbols: AGD9 | ARF-GAP domain 9 | chr5:18969950-18971817 REVERSE LENGTH=402	sp|Q9FIQ0|AGD9_ARATH Probable ADP-ribosylation factor GTPase-activating protein AGD9 OS=Arabidopsis thaliana GN=AGD9 PE=1 SV=1	0.154455
Bhi01G002467	brown	chr1	IPR001480 Bulb-type lectin domain	-	gi|700198402|gb|KGN53560.1| hypothetical protein Csa_4G082370 [Cucumis sativus]	AT1G78860.1 | Symbols: | D-mannose binding lectin protein with Apple-like carbohydrate-binding domain | chr1:29646168-29647499 REVERSE LENGTH=443	sp|Q39688|EP1G_DAUCA Epidermis-specific secreted glycoprotein EP1 OS=Daucus carota GN=EP1 PE=1 SV=1	0.153851
Bhi09G002695	green	chr9	IPR000246 Peptidase T2, asparaginase 2; IPR029055 Nucleophile aminohydrolases, N-terminal	GO:0016787 hydrolase activity;	gi|659103369|ref|XP_008452604.1| PREDICTED: probable isoaspartyl peptidase/L-asparaginase 2 [Cucumis melo]	AT3G16150.1 | Symbols: | N-terminal nucleophile aminohydrolases (Ntn hydrolases) superfamily protein | chr3:5471794-5473033 FORWARD LENGTH=325	sp|Q8GXG1|ASPGB_ARATH Probable isoaspartyl peptidase/L-asparaginase 2 OS=Arabidopsis thaliana GN=At3g16150 PE=2 SV=2	0.153704
Bhi09G001855	red	chr9	-	-	-	-	-	0.153672
Bhi02G001451	blue	chr2	IPR025521 Domain of unknown function DUF4409; IPR004314 Domain of unknown function DUF239	-	gi|659100275|ref|XP_008451013.1| PREDICTED: uncharacterized protein LOC103492421 [Cucumis melo]	AT3G13510.1 | Symbols: | Protein of Unknown Function (DUF239) | chr3:4403776-4405741 FORWARD LENGTH=419	-	0.153177
Bhi03G002061	turquoise	chr3	IPR032012 Stomatal closure-related actin-binding protein, actin-binding domain; IPR032015 Stomatal closure-related actin-binding protein, fused Ig-PH domain; IPR032009 Stomatal closure-related actin-binding protein, coiled-coil domain	GO:0003779 actin binding;	gi|449453155|ref|XP_004144324.1| PREDICTED: stomatal closure-related actin-binding protein 3 [Cucumis sativus] >gi|778694695|ref|XP_011653851.1| PREDICTED: stomatal closure-related actin-binding protein 3 [Cucumis sativus] >gi|700199528|gb|KGN54686.1| hypothetical protein Csa_4G425750 [Cucumis sativus]	AT2G40820.1 | Symbols: | FUNCTIONS IN: molecular_function unknown; INVOLVED IN: biological_process unknown; LOCATED IN: plasma membrane; EXPRESSED IN: 21 plant structures; EXPRESSED DURING: 13 growth stages; BEST Arabidopsis thaliana protein match is: myosin heavy chain-related (TAIR:AT3G56480.1); Has 203 Blast hits to 195 proteins in 64 species: Archae - 3; Bacteria - 13; Metazoa - 26; Fungi - 1…	sp|F4IIZ9|SCAB2_ARATH Stomatal closure-related actin-binding protein 2 OS=Arabidopsis thaliana GN=SCAB2 PE=2 SV=1	0.151718
Bhi08G000298	blue	chr8	-	-	gi|700209621|gb|KGN64717.1| hypothetical protein Csa_1G077190 [Cucumis sativus]	-	-	0.151605
Bhi11G001327	red	chr11	IPR003854 Gibberellin regulated protein	-	gi|659129996|ref|XP_008464949.1| PREDICTED: protein GAST1-like [Cucumis melo]	AT1G74670.1 | Symbols: | Gibberellin-regulated family protein | chr1:28053378-28053893 FORWARD LENGTH=101	sp|P27057|GAST1_SOLLC Protein GAST1 OS=Solanum lycopersicum GN=GAST1 PE=2 SV=1	0.151083
Bhi02G000785	blue	chr2	IPR016140 Bifunctional inhibitor/plant lipid transfer protein/seed storage helical domain; IPR027923 Hydrophobic seed protein	-	gi|659086466|ref|XP_008443949.1| PREDICTED: 36.4 kDa proline-rich protein [Cucumis melo]	AT2G10940.2 | Symbols: | Bifunctional inhibitor/lipid-transfer protein/seed storage 2S albumin superfamily protein | chr2:4311160-4312035 REVERSE LENGTH=291	sp|Q00451|PRF1_SOLLC 36.4 kDa proline-rich protein OS=Solanum lycopersicum GN=TPRP-F1 PE=2 SV=1	0.15049
Bhi05G001805	brown	chr5	IPR027443 Isopenicillin N synthase-like; IPR005123 Oxoglutarate/iron-dependent dioxygenase; IPR026992 Non-haem dioxygenase N-terminal domain	-	gi|694188369|gb|AIS71925.1| 1-aminocyclopropane-1-carboxylate oxidase 1 [Citrullus lanatus]	AT1G05010.1 | Symbols: EFE, ACO4, EAT1 | ethylene-forming enzyme | chr1:1431419-1432695 REVERSE LENGTH=323	sp|Q04644|ACCO1_CUCME 1-aminocyclopropane-1-carboxylate oxidase 1 OS=Cucumis melo GN=ACO1 PE=2 SV=1	0.149152
Bhi09G000669	black	chr9	IPR008050 DNA replication licensing factor Mcm7; IPR001208 MCM domain	GO:0003677 DNA binding; GO:0003678 DNA helicase activity; GO:0005524 ATP binding; GO:0005634 nucleus; GO:0006270 DNA replication initiation; GO:0042555 MCM complex;	gi|659101206|ref|XP_008451483.1| PREDICTED: DNA replication licensing factor MCM7 [Cucumis melo]	AT4G02060.2 | Symbols: PRL | Minichromosome maintenance (MCM2/3/5) family protein | chr4:901484-905297 FORWARD LENGTH=716	sp|P43299|MCM7_ARATH DNA replication licensing factor MCM7 OS=Arabidopsis thaliana GN=MCM7 PE=1 SV=2	0.14875
Bhi12G002173	yellow	chr12	IPR016558 DNA primase, large subunit, eukaryotic; IPR007238 DNA primase large subunit, eukaryotic/archaeal	GO:0016779 nucleotidyltransferase activity;	gi|659119806|ref|XP_008459852.1| PREDICTED: probable DNA primase large subunit [Cucumis melo]	AT1G67320.2 | Symbols: | DNA primase, large subunit family | chr1:25205520-25208966 REVERSE LENGTH=454	sp|Q84WJ2|PRI2_ARATH Probable DNA primase large subunit OS=Arabidopsis thaliana GN=At1g67320 PE=2 SV=2	0.148608
Bhi05G001810	blue	chr5	IPR017853 Glycoside hydrolase superfamily; IPR013781 Glycoside hydrolase, catalytic domain; IPR000490 Glycoside hydrolase family 17	-	gi|449444719|ref|XP_004140121.1| PREDICTED: glucan endo-1,3-beta-glucosidase 12 [Cucumis sativus] >gi|700192759|gb|KGN47963.1| hypothetical protein Csa_6G421570 [Cucumis sativus]	AT2G05790.1 | Symbols: | O-Glycosyl hydrolases family 17 protein | chr2:2199450-2201293 FORWARD LENGTH=472	sp|Q8L868|E1311_ARATH Glucan endo-1,3-beta-glucosidase 11 OS=Arabidopsis thaliana GN=At1g32860 PE=1 SV=1	0.148501
Bhi12G001063	turquoise	chr12	IPR000490 Glycoside hydrolase family 17; IPR012946 X8 domain; IPR017853 Glycoside hydrolase superfamily; IPR013781 Glycoside hydrolase, catalytic domain	GO:0004553 hydrolase activity, hydrolyzing O-glycosyl compounds; GO:0005975 carbohydrate metabolic process;	gi|449445079|ref|XP_004140301.1| PREDICTED: glucan endo-1,3-beta-glucosidase 2 [Cucumis sativus] >gi|700195881|gb|KGN51058.1| Glucan endo-1,3-beta-glucosidase [Cucumis sativus]	AT1G66250.1 | Symbols: | O-Glycosyl hydrolases family 17 protein | chr1:24693063-24695416 FORWARD LENGTH=505	sp|Q9C7U5|E132_ARATH Glucan endo-1,3-beta-glucosidase 2 OS=Arabidopsis thaliana GN=At1g66250 PE=1 SV=2	0.147917
Bhi08G001456	brown	chr8	IPR001926 Tryptophan synthase beta subunit-like PLP-dependent enzyme	-	gi|659067803|ref|XP_008441364.1| PREDICTED: tryptophan synthase beta chain 1-like [Cucumis melo]	AT5G28237.1 | Symbols: | Pyridoxal-5'-phosphate-dependent enzyme family protein | chr5:10207477-10213542 REVERSE LENGTH=465	sp|O50046|TRPB_CAMAC Tryptophan synthase beta chain 2, chloroplastic OS=Camptotheca acuminata GN=TSB PE=2 SV=1	0.146529
Bhi06G000784	blue	chr6	IPR021109 Aspartic peptidase domain; IPR032799 Xylanase inhibitor, C-terminal; IPR001461 Aspartic peptidase; IPR032861 Xylanase inhibitor, N-terminal	-	gi|449442281|ref|XP_004138910.1| PREDICTED: aspartic proteinase-like protein 2 [Cucumis sativus] >gi|700206245|gb|KGN61364.1| hypothetical protein Csa_2G099480 [Cucumis sativus]	AT1G05840.1 | Symbols: | Eukaryotic aspartyl protease family protein | chr1:1762843-1766150 REVERSE LENGTH=485	sp|Q9S9K4|ASPL2_ARATH Aspartic proteinase-like protein 2 OS=Arabidopsis thaliana GN=At1g65240 PE=1 SV=2	0.144035
Bhi01G001484	turquoise	chr1	IPR005202 Transcription factor GRAS; IPR021914 Transcriptional factor DELLA, N-terminal; IPR030006 Transcriptional factor DELLA	-	gi|586941282|emb|CCG14222.1| gibberellin DELLA protein [Cucumis sativus]	AT2G01570.1 | Symbols: RGA1, RGA | GRAS family transcription factor family protein | chr2:255581-257344 REVERSE LENGTH=587	sp|Q8S4W7|GAI1_VITVI DELLA protein GAI1 OS=Vitis vinifera GN=GAI1 PE=2 SV=1	0.14278
Bhi12G000261	grey	chr12	IPR023271 Aquaporin-like; IPR000425 Major intrinsic protein; IPR022357 Major intrinsic protein, conserved site	-	gi|659073862|ref|XP_008437293.1| PREDICTED: aquaporin PIP1-2 [Cucumis melo]	AT4G00430.1 | Symbols: TMP-C, PIP1;4, PIP1E | plasma membrane intrinsic protein 1;4 | chr4:186143-187531 REVERSE LENGTH=287	sp|Q6EU94|PIP11_ORYSJ Aquaporin PIP1-1 OS=Oryza sativa subsp. japonica GN=PIP1-1 PE=2 SV=1	0.142225
Bhi06G001517	grey	chr6	IPR004827 Basic-leucine zipper domain; IPR020983 Basic leucine-zipper, C-terminal	GO:0003700 transcription factor activity, sequence-specific DNA binding; GO:0006355 regulation of transcription, DNA-templated; GO:0043565 sequence-specific DNA binding;	gi|659070631|ref|XP_008455950.1| PREDICTED: light-inducible protein CPRF2-like [Cucumis melo]	AT5G28770.2 | Symbols: BZO2H3 | bZIP transcription factor family protein | chr5:10796648-10798147 REVERSE LENGTH=314	sp|Q99090|CPRF2_PETCR Light-inducible protein CPRF2 OS=Petroselinum crispum GN=CPRF2 PE=2 SV=2	0.141891
Bhi05G001258	turquoise	chr5	IPR000406 Rho protein GDP-dissociation inhibitor; IPR024792 Rho GDP-dissociation inhibitor domain; IPR014756 Immunoglobulin E-set	GO:0005094 Rho GDP-dissociation inhibitor activity; GO:0005737 cytoplasm;	gi|659110981|ref|XP_008455513.1| PREDICTED: rho GDP-dissociation inhibitor 1-like [Cucumis melo]	AT3G07880.1 | Symbols: SCN1 | Immunoglobulin E-set superfamily protein | chr3:2514175-2515544 FORWARD LENGTH=240	sp|Q9SFC6|GDIR_ARATH Rho GDP-dissociation inhibitor 1 OS=Arabidopsis thaliana GN=GDI1 PE=1 SV=1	0.141402
Bhi09G002862	blue	chr9	IPR013766 Thioredoxin domain; IPR011990 Tetratricopeptide-like helical domain; IPR019734 Tetratricopeptide repeat; IPR013026 Tetratricopeptide repeat-containing domain; IPR012336 Thioredoxin-like fold	GO:0045454 cell redox homeostasis;	gi|449456585|ref|XP_004146029.1| PREDICTED: TPR repeat-containing thioredoxin TTL1 [Cucumis sativus] >gi|700199916|gb|KGN55074.1| hypothetical protein Csa_4G627240 [Cucumis sativus]	AT1G53300.1 | Symbols: TTL1 | tetratricopetide-repeat thioredoxin-like 1 | chr1:19879726-19882375 FORWARD LENGTH=699	sp|Q9MAH1|TTL1_ARATH TPR repeat-containing thioredoxin TTL1 OS=Arabidopsis thaliana GN=TTL1 PE=1 SV=1	0.140803
Bhi11G002092	turquoise	chr11	IPR004265 Plant disease resistance response protein	-	gi|659085784|ref|XP_008443601.1| PREDICTED: dirigent protein 22-like, partial [Cucumis melo]	AT1G55210.2 | Symbols: | Disease resistance-responsive (dirigent-like protein) family protein | chr1:20598057-20598620 REVERSE LENGTH=187	sp|Q9C891|DIR20_ARATH Dirigent protein 20 OS=Arabidopsis thaliana GN=DIR20 PE=2 SV=1	0.140314
Bhi10G000264	turquoise	chr10	IPR032675 Leucine-rich repeat domain, L domain-like; IPR013210 Leucine-rich repeat-containing N-terminal, plant-type; IPR001611 Leucine-rich repeat	-	gi|1035406389|ref|XP_008449738.2| PREDICTED: DNA-damage-repair/toleration protein DRT100-like [Cucumis melo]	AT3G20820.1 | Symbols: | Leucine-rich repeat (LRR) family protein | chr3:7280930-7282027 FORWARD LENGTH=365	sp|Q00874|DR100_ARATH DNA-damage-repair/toleration protein DRT100 OS=Arabidopsis thaliana GN=DRT100 PE=2 SV=2	0.140006
Bhi08G001495	blue	chr8	IPR008972 Cupredoxin; IPR001117 Multicopper oxidase, type 1; IPR011706 Multicopper oxidase, type 2; IPR011707 Multicopper oxidase, type 3	-	gi|449471151|ref|XP_004153223.1| PREDICTED: L-ascorbate oxidase homolog [Cucumis sativus]	AT4G22010.1 | Symbols: sks4 | SKU5 similar 4 | chr4:11663429-11666463 FORWARD LENGTH=541	sp|Q00624|ASOL_BRANA L-ascorbate oxidase homolog OS=Brassica napus GN=Bp10 PE=2 SV=1	0.139261
Bhi10G001757	green	chr10	-	-	-	-	-	0.139138
Bhi03G001684	green	chr3	IPR004713 Calcium/proton exchanger; IPR004837 Sodium/calcium exchanger membrane region; IPR004798 Calcium/proton exchanger CAX	GO:0006812 cation transport; GO:0008324 cation transmembrane transporter activity; GO:0016021 integral component of membrane; GO:0055085 transmembrane transport;	gi|525507282|ref|NP_001267681.1| vacuolar cation/proton exchanger 1-like [Cucumis sativus] >gi|778689092|ref|XP_011652900.1| PREDICTED: vacuolar cation/proton exchanger 1-like isoform X1 [Cucumis sativus] >gi|402797827|gb|AFQ99295.1| cation exchanger CAX3 [Cucumis sativus] >gi|700199222|gb|KGN54380.1| Vacuolar cation/proton exchanger 1a [Cucumis sativus]	AT2G38170.1 | Symbols: CAX1, ATCAX1, RCI4 | cation exchanger 1 | chr2:15989429-15993178 REVERSE LENGTH=463	sp|Q39253|CAX1_ARATH Vacuolar cation/proton exchanger 1 OS=Arabidopsis thaliana GN=CAX1 PE=1 SV=3	0.138909
Bhi07G001344	red	chr7	IPR001789 Signal transduction response regulator, receiver domain; IPR011006 CheY-like superfamily	GO:0000160 phosphorelay signal transduction system;	gi|449434875|ref|XP_004135221.1| PREDICTED: two-component response regulator ARR5 [Cucumis sativus] >gi|700196668|gb|KGN51845.1| hypothetical protein Csa_5G603910 [Cucumis sativus]	AT1G59940.1 | Symbols: ARR3 | response regulator 3 | chr1:22065894-22066895 REVERSE LENGTH=231	sp|Q9ZWS9|ARR3_ARATH Two-component response regulator ARR3 OS=Arabidopsis thaliana GN=ARR3 PE=2 SV=1	0.138842
Bhi01G002043	yellow	chr1	IPR016140 Bifunctional inhibitor/plant lipid transfer protein/seed storage helical domain	-	gi|659107927|ref|XP_008453924.1| PREDICTED: putative lipid-transfer protein DIR1 [Cucumis melo]	AT5G48490.1 | Symbols: | Bifunctional inhibitor/lipid-transfer protein/seed storage 2S albumin superfamily protein | chr5:19647932-19648237 REVERSE LENGTH=101	sp|Q8W453|DIRL1_ARATH Putative lipid-transfer protein DIR1 OS=Arabidopsis thaliana GN=DIR1 PE=1 SV=1	0.138465
Bhi01G002778	green	chr1	IPR001876 Zinc finger, RanBP2-type	GO:0008270 zinc ion binding;	gi|700197715|gb|KGN52873.1| hypothetical protein Csa_4G004840 [Cucumis sativus]	AT3G15680.1 | Symbols: | Ran BP2/NZF zinc finger-like superfamily protein | chr3:5315437-5316048 FORWARD LENGTH=164	sp|O13801|YE04_SCHPO Uncharacterized RNA-binding protein C17H9.04c OS=Schizosaccharomyces pombe (strain 972 / ATCC 24843) GN=SPAC17H9.04c PE=1 SV=1	0.138221
Bhi10G001382	green	chr10	-	-	-	-	-	0.138193
Bhi08G001220	yellow	chr8	IPR023434 Argininosuccinate synthase, type 1 subfamily; IPR014729 Rossmann-like alpha/beta/alpha sandwich fold; IPR001518 Argininosuccinate synthase; IPR024074 Argininosuccinate synthetase, catalytic/multimerisation domain body; IPR018223 Argininosuccinate synthase, conserved site	GO:0004055 argininosuccinate synthase activity;	gi|449469631|ref|XP_004152522.1| PREDICTED: argininosuccinate synthase, chloroplastic [Cucumis sativus] >gi|700209305|gb|KGN64401.1| hypothetical protein Csa_1G050400 [Cucumis sativus]	AT4G24830.1 | Symbols: | arginosuccinate synthase family | chr4:12793085-12795857 REVERSE LENGTH=494	sp|Q9SZX3|ASSY_ARATH Argininosuccinate synthase, chloroplastic OS=Arabidopsis thaliana GN=At4g24830 PE=1 SV=3	0.137558
Bhi10G000574	red	chr10	IPR007118 Expansin/Lol pI; IPR009009 RlpA-like double-psi beta-barrel domain; IPR002963 Expansin; IPR007112 Expansin/pollen allergen, DPBB domain; IPR007117 Expansin, cellulose-binding-like domain	GO:0005576 extracellular region;	gi|659128259|ref|XP_008464122.1| PREDICTED: expansin-A4 [Cucumis melo]	AT2G39700.1 | Symbols: ATEXPA4, ATEXP4, ATHEXP ALPHA 1.6, EXPA4 | expansin A4 | chr2:16544246-16545434 REVERSE LENGTH=257	sp|O48818|EXPA4_ARATH Expansin-A4 OS=Arabidopsis thaliana GN=EXPA4 PE=1 SV=1	0.13696
Bhi10G001779	brown	chr10	IPR025322 Protein of unknown function DUF4228, plant	-	gi|659115911|ref|XP_008457802.1| PREDICTED: uncharacterized protein LOC103497404 [Cucumis melo]	AT2G23690.1 | Symbols: | unknown protein; FUNCTIONS IN: molecular_function unknown; INVOLVED IN: N-terminal protein myristoylation; LOCATED IN: cellular_component unknown; EXPRESSED IN: 7 plant structures; EXPRESSED DURING: petal differentiation and expansion stage; BEST Arabidopsis thaliana protein match is: unknown protein (TAIR:AT4G37240.1); Has 243 Blast hits to 243 proteins in 15 species: Ar…	-	0.135601
Bhi05G000059	green	chr5	IPR000210 BTB/POZ domain; IPR011333 SKP1/BTB/POZ domain; IPR027356 NPH3 domain	GO:0005515 protein binding;	gi|778682133|ref|XP_004144382.2| PREDICTED: BTB/POZ domain-containing protein At5g48800 [Cucumis sativus] >gi|700203228|gb|KGN58361.1| hypothetical protein Csa_3G627720 [Cucumis sativus]	AT5G48800.1 | Symbols: | Phototropic-responsive NPH3 family protein | chr5:19786881-19789003 FORWARD LENGTH=614	sp|Q9FKB6|Y5880_ARATH BTB/POZ domain-containing protein At5g48800 OS=Arabidopsis thaliana GN=At5g48800 PE=2 SV=1	0.1353
Bhi07G001279	green	chr7	IPR006456 ZF-HD homeobox protein, Cys/His-rich dimerisation domain; IPR009057 Homeodomain-like; IPR006455 Homeodomain, ZF-HD class	-	gi|449435348|ref|XP_004135457.1| PREDICTED: zinc-finger homeodomain protein 8 [Cucumis sativus] >gi|700196737|gb|KGN51914.1| ZF-HD homeobox domain-containing protein [Cucumis sativus]	AT1G69600.1 | Symbols: ZFHD1, ATHB29, ZHD11 | zinc finger homeodomain 1 | chr1:26182470-26183198 FORWARD LENGTH=242	sp|Q9SEZ1|ZHD11_ARATH Zinc-finger homeodomain protein 11 OS=Arabidopsis thaliana GN=ZHD11 PE=1 SV=1	0.135232
Bhi09G002523	turquoise	chr9	IPR012876 Protein of unknown function DUF1677, plant	-	gi|700200230|gb|KGN55388.1| hypothetical protein Csa_4G648590 [Cucumis sativus]	AT1G72510.2 | Symbols: | Protein of unknown function (DUF1677) | chr1:27303906-27304403 FORWARD LENGTH=165	-	0.134528
Bhi01G001718	yellow	chr1	IPR019378 GDP-fucose protein O-fucosyltransferase; IPR024709 O-fucosyltransferase, plant	-	gi|659111057|ref|XP_008455558.1| PREDICTED: uncharacterized protein At1g04910-like [Cucumis melo]	AT5G15740.1 | Symbols: | O-fucosyltransferase family protein | chr5:5134788-5136956 REVERSE LENGTH=508	sp|Q8W486|Y1491_ARATH Uncharacterized protein At1g04910 OS=Arabidopsis thaliana GN=At1g04910 PE=2 SV=1	0.133928
Bhi05G000162	yellow	chr5	IPR014939 CDT1 Geminin-binding domain-like; IPR011991 Winged helix-turn-helix DNA-binding domain; IPR032054 DNA replication factor Cdt1, C-terminal	-	gi|659123165|ref|XP_008461526.1| PREDICTED: CDT1-like protein b [Cucumis melo]	AT2G31270.1 | Symbols: ATCDT1A, CDT1A, CDT1 | homolog of yeast CDT1 A | chr2:13329037-13331544 FORWARD LENGTH=571	sp|Q9SJW9|CDT1A_ARATH CDT1-like protein a, chloroplastic OS=Arabidopsis thaliana GN=CDT1A PE=1 SV=1	0.133532
Bhi08G000692	green	chr8	-	-	gi|449443564|ref|XP_004139547.1| PREDICTED: protein TsetseEP-like [Cucumis sativus] >gi|700209967|gb|KGN65063.1| hypothetical protein Csa_1G187170 [Cucumis sativus]	-	-	0.13305
Bhi09G001016	blue	chr9	IPR016140 Bifunctional inhibitor/plant lipid transfer protein/seed storage helical domain	-	gi|778727191|ref|XP_004150334.2| PREDICTED: putative lipid-transfer protein DIR1 [Cucumis sativus]	AT5G48485.1 | Symbols: DIR1 | Bifunctional inhibitor/lipid-transfer protein/seed storage 2S albumin superfamily protein | chr5:19646317-19646625 REVERSE LENGTH=102	sp|Q8W453|DIRL1_ARATH Putative lipid-transfer protein DIR1 OS=Arabidopsis thaliana GN=DIR1 PE=1 SV=1	0.13238
Bhi08G001519	blue	chr8	IPR002068 Alpha crystallin/Hsp20 domain; IPR008978 HSP20-like chaperone; IPR031107 Small heat shock protein HSP20	-	gi|315932702|gb|ADU55781.1| HSP15 [Citrullus lanatus]	AT4G21870.1 | Symbols: | HSP20-like chaperones superfamily protein | chr4:11603756-11604285 REVERSE LENGTH=134	sp|O49710|HS154_ARATH 15.4 kDa class V heat shock protein OS=Arabidopsis thaliana GN=HSP15.4 PE=2 SV=1	0.132326
Bhi11G002229	black	chr11	-	-	gi|1035398968|ref|XP_008443105.2| PREDICTED: LOW QUALITY PROTEIN: DNA-directed RNA polymerase I subunit 1 [Cucumis melo]	-	-	0.132272
Bhi11G001585	yellow	chr11	IPR008004 Uncharacterised protein family UPF0503	-	gi|449439922|ref|XP_004137734.1| PREDICTED: UPF0503 protein At3g09070, chloroplastic-like [Cucumis sativus] >gi|700203660|gb|KGN58793.1| hypothetical protein Csa_3G732510 [Cucumis sativus]	AT3G09070.1 | Symbols: | Protein of unknown function (DUF740) | chr3:2768880-2770937 REVERSE LENGTH=685	sp|Q9SS80|U503A_ARATH UPF0503 protein At3g09070, chloroplastic OS=Arabidopsis thaliana GN=At3g09070 PE=1 SV=1	0.131564
Bhi01G001276	green	chr1	IPR004367 Cyclin, C-terminal domain; IPR013763 Cyclin-like; IPR006671 Cyclin, N-terminal	GO:0005634 nucleus;	gi|449445902|ref|XP_004140711.1| PREDICTED: cyclin-D3-3-like [Cucumis sativus] >gi|700202371|gb|KGN57504.1| hypothetical protein Csa_3G199660 [Cucumis sativus]	AT4G34160.1 | Symbols: CYCD3;1, CYCD3 | CYCLIN D3;1 | chr4:16357903-16359304 FORWARD LENGTH=376	sp|P42753|CCD31_ARATH Cyclin-D3-1 OS=Arabidopsis thaliana GN=CYCD3-1 PE=1 SV=3	0.131237
Bhi09G000670	turquoise	chr9	IPR008050 DNA replication licensing factor Mcm7; IPR005202 Transcription factor GRAS; IPR012340 Nucleic acid-binding, OB-fold; IPR027925 MCM N-terminal domain	GO:0003677 DNA binding; GO:0003678 DNA helicase activity; GO:0005524 ATP binding; GO:0005634 nucleus; GO:0006270 DNA replication initiation; GO:0042555 MCM complex;	gi|778728247|ref|XP_011659394.1| PREDICTED: DNA replication licensing factor MCM7 isoform X2 [Cucumis sativus]	AT4G02060.2 | Symbols: PRL | Minichromosome maintenance (MCM2/3/5) family protein | chr4:901484-905297 FORWARD LENGTH=716	sp|P43299|MCM7_ARATH DNA replication licensing factor MCM7 OS=Arabidopsis thaliana GN=MCM7 PE=1 SV=2	0.131198
Bhi08G000555	turquoise	chr8	IPR003480 Transferase; IPR023213 Chloramphenicol acetyltransferase-like domain	GO:0016747 transferase activity, transferring acyl groups other than amino-acyl groups;	gi|778661383|ref|XP_011658005.1| PREDICTED: phenolic glucoside malonyltransferase 2-like [Cucumis sativus]	AT3G29635.1 | Symbols: | HXXXD-type acyl-transferase family protein | chr3:11465851-11467227 REVERSE LENGTH=458	sp|Q940Z5|PMAT1_ARATH Phenolic glucoside malonyltransferase 1 OS=Arabidopsis thaliana GN=PMAT1 PE=1 SV=1	0.131075
Bhi04G000523	turquoise	chr4	IPR004873 BURP domain	-	gi|659087185|ref|XP_008444317.1| PREDICTED: polygalacturonase 1 beta-like protein 3 [Cucumis melo]	AT1G70370.2 | Symbols: PG2 | polygalacturonase 2 | chr1:26513003-26514998 REVERSE LENGTH=626	sp|P92990|PGL3_ARATH Polygalacturonase 1 beta-like protein 3 OS=Arabidopsis thaliana GN=PGL3 PE=2 SV=2	0.130844
Bhi01G001108	green	chr1	IPR018040 Pectinesterase, active site; IPR000070 Pectinesterase, catalytic; IPR006501 Pectinesterase inhibitor domain; IPR012334 Pectin lyase fold; IPR011050 Pectin lyase fold/virulence factor	-	gi|449456965|ref|XP_004146219.1| PREDICTED: probable pectinesterase/pectinesterase inhibitor 34 [Cucumis sativus] >gi|700202542|gb|KGN57675.1| hypothetical protein Csa_3G239880 [Cucumis sativus]	AT3G49220.1 | Symbols: | Plant invertase/pectin methylesterase inhibitor superfamily | chr3:18249840-18253647 FORWARD LENGTH=598	sp|Q9M3B0|PME34_ARATH Probable pectinesterase/pectinesterase inhibitor 34 OS=Arabidopsis thaliana GN=PME34 PE=2 SV=1	0.130512
Bhi05G001623	turquoise	chr5	-	-	gi|659110606|ref|XP_008455314.1| PREDICTED: uncharacterized protein LOC103495510 [Cucumis melo]	AT4G28310.1 | Symbols: | unknown protein; BEST Arabidopsis thaliana protein match is: unknown protein (TAIR:AT1G52270.1); Has 30201 Blast hits to 17322 proteins in 780 species: Archae - 12; Bacteria - 1396; Metazoa - 17338; Fungi - 3422; Plants - 5037; Viruses - 0; Other Eukaryotes - 2996 (source: NCBI BLink). | chr4:14017458-14018066 FORWARD LENGTH=202	-	0.129764
Bhi02G000632	brown	chr2	-	-	gi|659086186|ref|XP_008443802.1| PREDICTED: uncharacterized protein LOC103487306 isoform X1 [Cucumis melo]	AT5G57790.2 | Symbols: | unknown protein; Has 13 Blast hits to 11 proteins in 5 species: Archae - 0; Bacteria - 0; Metazoa - 0; Fungi - 0; Plants - 13; Viruses - 0; Other Eukaryotes - 0 (source: NCBI BLink). | chr5:23412243-23413442 REVERSE LENGTH=192	-	0.129278
Bhi03G001507	blue	chr3	-	-	-	-	-	0.129007
Bhi12G000795	brown	chr12	IPR011991 Winged helix-turn-helix DNA-binding domain; IPR017956 AT hook, DNA-binding motif; IPR005818 Linker histone H1/H5, domain H15; IPR020478 AT hook-like; IPR031059 High mobility group protein HMGA, plant; IPR000116 High mobility group protein HMGA	-	gi|659133908|ref|XP_008466945.1| PREDICTED: HMG-Y-related protein A [Cucumis melo]	AT1G14900.1 | Symbols: HMGA | high mobility group A | chr1:5138665-5139353 REVERSE LENGTH=204	sp|Q43386|HMGYA_ARATH HMG-Y-related protein A OS=Arabidopsis thaliana GN=HMGA PE=1 SV=1	0.128753
Bhi07G001024	turquoise	chr7	IPR021109 Aspartic peptidase domain; IPR032861 Xylanase inhibitor, N-terminal; IPR001461 Aspartic peptidase; IPR032799 Xylanase inhibitor, C-terminal	-	gi|449449334|ref|XP_004142420.1| PREDICTED: protein ASPARTIC PROTEASE IN GUARD CELL 2 [Cucumis sativus] >gi|700197147|gb|KGN52324.1| Aspartic proteinase nepenthesin-1 [Cucumis sativus]	AT3G54400.1 | Symbols: | Eukaryotic aspartyl protease family protein | chr3:20140291-20142599 REVERSE LENGTH=425	sp|O04496|AED3_ARATH Aspartyl protease AED3 OS=Arabidopsis thaliana GN=AED3 PE=1 SV=1	0.128645
Bhi03G001475	blue	chr3	IPR029058 Alpha/Beta hydrolase fold; IPR000073 Alpha/beta hydrolase fold-1	-	gi|778718283|ref|XP_011657843.1| PREDICTED: salicylic acid-binding protein 2-like [Cucumis sativus] >gi|700193289|gb|KGN48493.1| hypothetical protein Csa_6G490080 [Cucumis sativus]	AT2G23620.1 | Symbols: ATMES1, MES1 | methyl esterase 1 | chr2:10047462-10049248 REVERSE LENGTH=263	sp|Q6RYA0|SABP2_TOBAC Salicylic acid-binding protein 2 OS=Nicotiana tabacum GN=SABP2 PE=1 SV=1	0.12858
Bhi09G001015	yellow	chr9	-	-	gi|778727195|ref|XP_004150335.2| PREDICTED: uncharacterized protein LOC101219200 [Cucumis sativus] >gi|700189458|gb|KGN44691.1| hypothetical protein Csa_7G372860 [Cucumis sativus]	AT5G48500.1 | Symbols: | unknown protein; BEST Arabidopsis thaliana protein match is: unknown protein (TAIR:AT2G10930.1); Has 30201 Blast hits to 17322 proteins in 780 species: Archae - 12; Bacteria - 1396; Metazoa - 17338; Fungi - 3422; Plants - 5037; Viruses - 0; Other Eukaryotes - 2996 (source: NCBI BLink). | chr5:19653235-19654017 FORWARD LENGTH=167	-	0.128315
Bhi02G000528	green	chr2	IPR012946 X8 domain	-	gi|659106148|ref|XP_008453264.1| PREDICTED: PLASMODESMATA CALLOSE-BINDING PROTEIN 3 [Cucumis melo]	AT1G18650.1 | Symbols: PDCB3 | plasmodesmata callose-binding protein 3 | chr1:6419036-6420413 REVERSE LENGTH=184	sp|Q9FZ86|PDCB3_ARATH PLASMODESMATA CALLOSE-BINDING PROTEIN 3 OS=Arabidopsis thaliana GN=PDCB3 PE=1 SV=1	0.128104
Bhi09G002153	brown	chr9	IPR010410 Protein of unknown function DUF1005	-	gi|449436910|ref|XP_004136235.1| PREDICTED: uncharacterized protein LOC101220969 [Cucumis sativus] >gi|700205170|gb|KGN60303.1| hypothetical protein Csa_3G894510 [Cucumis sativus]	AT1G10020.1 | Symbols: | Protein of unknown function (DUF1005) | chr1:3269939-3271732 REVERSE LENGTH=461	-	0.128052
Bhi08G001509	turquoise	chr8	-	-	-	-	-	0.127746
Bhi12G000996	brown	chr12	IPR009071 High mobility group box domain	-	gi|449464956|ref|XP_004150195.1| PREDICTED: high mobility group B protein 7 [Cucumis sativus]	AT5G23420.1 | Symbols: HMGB6 | high-mobility group box 6 | chr5:7888712-7890111 REVERSE LENGTH=241	sp|Q8LDF9|HMGB7_ARATH High mobility group B protein 7 OS=Arabidopsis thaliana GN=HMGB7 PE=1 SV=1	0.126383
Bhi11G001054	yellow	chr11	IPR002772 Glycoside hydrolase family 3 C-terminal domain; IPR026891 Fibronectin type III-like domain; IPR026892 Glycoside hydrolase family 3; IPR001764 Glycoside hydrolase, family 3, N-terminal; IPR017853 Glycoside hydrolase superfamily	GO:0004553 hydrolase activity, hydrolyzing O-glycosyl compounds; GO:0005975 carbohydrate metabolic process;	gi|659108620|ref|XP_008454298.1| PREDICTED: probable beta-D-xylosidase 2 isoform X1 [Cucumis melo]	AT1G02640.1 | Symbols: BXL2, ATBXL2 | beta-xylosidase 2 | chr1:564293-567580 FORWARD LENGTH=768	sp|Q94KD8|BXL2_ARATH Probable beta-D-xylosidase 2 OS=Arabidopsis thaliana GN=BXL2 PE=2 SV=1	0.125744
Bhi10G001216	green	chr10	IPR023213 Chloramphenicol acetyltransferase-like domain; IPR003480 Transferase	-	gi|449468295|ref|XP_004151857.1| PREDICTED: benzyl alcohol O-benzoyltransferase-like [Cucumis sativus] >gi|700208211|gb|KGN63330.1| hypothetical protein Csa_2G429030 [Cucumis sativus]	AT5G17540.1 | Symbols: | HXXXD-type acyl-transferase family protein | chr5:5782061-5783682 REVERSE LENGTH=461	sp|Q8GT20|BEBT_TOBAC Benzyl alcohol O-benzoyltransferase OS=Nicotiana tabacum GN=HSR201 PE=1 SV=1	0.125441
Bhi05G000128	blue	chr5	IPR001357 BRCT domain; IPR031099 BRCA1-associated; IPR017907 Zinc finger, RING-type, conserved site; IPR013083 Zinc finger, RING/FYVE/PHD-type; IPR001841 Zinc finger, RING-type	-	gi|778681924|ref|XP_011651612.1| PREDICTED: protein BREAST CANCER SUSCEPTIBILITY 1 homolog isoform X2 [Cucumis sativus]	AT1G04020.2 | Symbols: ATBARD1, BARD1 | breast cancer associated RING 1 | chr1:1036610-1040045 FORWARD LENGTH=713	sp|F4I443|BARD1_ARATH BRCA1-associated RING domain protein 1 OS=Arabidopsis thaliana GN=BARD1 PE=1 SV=1	0.124687
Bhi12G000753	yellow	chr12	IPR006818 Histone chaperone, ASF1-like	GO:0005634 nucleus; GO:0006333 chromatin assembly or disassembly;	gi|659072912|ref|XP_008467163.1| PREDICTED: probable histone chaperone ASF1A [Cucumis melo]	AT5G38110.1 | Symbols: SGA1, SGA01, ASF1B | anti- silencing function 1b | chr5:15208643-15210064 FORWARD LENGTH=218	sp|Q9LS09|ASF1B_ARATH Histone chaperone ASF1B OS=Arabidopsis thaliana GN=ASF1B PE=1 SV=1	0.124572
Bhi03G001177	turquoise	chr3	IPR009072 Histone-fold; IPR000558 Histone H2B; IPR007125 Histone H2A/H2B/H3	GO:0046982 protein heterodimerization activity;	gi|1216284984|ref|XP_021627220.1| probable histone H2B.3 [Manihot esculenta] >gi|1035908504|gb|OAY38101.1| hypothetical protein MANES_11G152700 [Manihot esculenta]	AT2G28720.1 | Symbols: | Histone superfamily protein | chr2:12327043-12327498 FORWARD LENGTH=151	sp|P93354|H2B_TOBAC Histone H2B OS=Nicotiana tabacum GN=HIS2B PE=2 SV=3	0.12422
Bhi12G001893	green	chr12	-	-	gi|449445692|ref|XP_004140606.1| PREDICTED: uncharacterized protein LOC101214238 [Cucumis sativus] >gi|700191373|gb|KGN46577.1| hypothetical protein Csa_6G109720 [Cucumis sativus]	AT3G23740.1 | Symbols: | unknown protein; FUNCTIONS IN: molecular_function unknown; INVOLVED IN: biological_process unknown; LOCATED IN: chloroplast; EXPRESSED IN: 9 plant structures; EXPRESSED DURING: C globular stage, F mature embryo stage, petal differentiation and expansion stage, E expanded cotyledon stage, D bilateral stage; BEST Arabidopsis thaliana protein match is: unknown protein (TAIR:…	-	0.124159
BhiUN50G60	yellow	Contig50_2	-	-	gi|449438995|ref|XP_004137273.1| PREDICTED: classical arabinogalactan protein 1-like [Cucumis sativus] >gi|700198569|gb|KGN53727.1| hypothetical protein Csa_4G111620 [Cucumis sativus]	AT5G64310.1 | Symbols: AGP1, ATAGP1 | arabinogalactan protein 1 | chr5:25722018-25722413 FORWARD LENGTH=131	-	0.123993
Bhi04G000461	yellow	chr4	IPR012336 Thioredoxin-like fold; IPR002109 Glutaredoxin; IPR011905 Glutaredoxin-like, plant II; IPR014025 Glutaredoxin subgroup	-	gi|449450357|ref|XP_004142929.1| PREDICTED: glutaredoxin-C6-like [Cucumis sativus] >gi|700207265|gb|KGN62384.1| Glutaredoxin [Cucumis sativus]	AT4G33040.1 | Symbols: | Thioredoxin superfamily protein | chr4:15940779-15941213 REVERSE LENGTH=144	sp|Q8L9S3|GRXC6_ARATH Glutaredoxin-C6 OS=Arabidopsis thaliana GN=GRXC6 PE=2 SV=2	0.123807
Bhi08G000820	brown	chr8	IPR011074 CRAL/TRIO, N-terminal domain; IPR001251 CRAL-TRIO lipid binding domain; IPR009038 GOLD domain	-	gi|449435546|ref|XP_004135556.1| PREDICTED: patellin-4 [Cucumis sativus] >gi|700210850|gb|KGN65946.1| hypothetical protein Csa_1G541390 [Cucumis sativus]	AT4G09160.1 | Symbols: | SEC14 cytosolic factor family protein / phosphoglyceride transfer family protein | chr4:5839761-5842158 FORWARD LENGTH=668	sp|Q9M0R2|PATL5_ARATH Patellin-5 OS=Arabidopsis thaliana GN=PATL5 PE=1 SV=2	0.123176
Bhi09G002186	turquoise	chr9	IPR016024 Armadillo-type fold; IPR011989 Armadillo-like helical	GO:0005488 binding;	gi|449436874|ref|XP_004136217.1| PREDICTED: U-box domain-containing protein 26 [Cucumis sativus] >gi|700205195|gb|KGN60328.1| hypothetical protein Csa_3G895740 [Cucumis sativus]	AT5G11550.1 | Symbols: | ARM repeat superfamily protein | chr5:3708203-3709147 REVERSE LENGTH=314	sp|Q9FXA4|PUB26_ARATH U-box domain-containing protein 26 OS=Arabidopsis thaliana GN=PUB26 PE=2 SV=1	0.123146
Bhi04G000361	turquoise	chr4	IPR017930 Myb domain; IPR001005 SANT/Myb domain; IPR009057 Homeodomain-like	-	gi|449450253|ref|XP_004142878.1| PREDICTED: transcription factor MYB44-like [Cucumis sativus] >gi|700207358|gb|KGN62477.1| hypothetical protein Csa_2G355030 [Cucumis sativus]	AT4G37260.1 | Symbols: MYB73, ATMYB73 | myb domain protein 73 | chr4:17540602-17541564 FORWARD LENGTH=320	sp|Q9FDW1|MYB44_ARATH Transcription factor MYB44 OS=Arabidopsis thaliana GN=MYB44 PE=2 SV=1	0.122792
Bhi04G001686	turquoise	chr4	-	-	gi|566256711|ref|XP_006388280.1| hypothetical protein POPTR_0248s00200g [Populus trichocarpa] >gi|550309931|gb|ERP47194.1| hypothetical protein POPTR_0248s00200g [Populus trichocarpa]	-	-	0.122659
Bhi06G001288	turquoise	chr6	IPR002119 Histone H2A; IPR007125 Histone H2A/H2B/H3; IPR009072 Histone-fold; IPR032458 Histone H2A conserved site; IPR032454 Histone H2A, C-terminal domain	GO:0000786 nucleosome; GO:0003677 DNA binding; GO:0005634 nucleus;	gi|659070276|ref|XP_008454292.1| PREDICTED: probable histone H2A.5 [Cucumis melo]	AT5G27670.1 | Symbols: HTA7 | histone H2A 7 | chr5:9792807-9793365 REVERSE LENGTH=150	sp|Q94F49|H2A5_ARATH Probable histone H2A.5 OS=Arabidopsis thaliana GN=At5g27670 PE=1 SV=1	0.12234
Bhi01G002320	turquoise	chr1	IPR005150 Cellulose synthase; IPR029044 Nucleotide-diphospho-sugar transferases	GO:0016020 membrane; GO:0016760 cellulose synthase (UDP-forming) activity; GO:0030244 cellulose biosynthetic process;	gi|778697527|ref|XP_004149010.2| PREDICTED: cellulose synthase-like protein G2 [Cucumis sativus] >gi|700198269|gb|KGN53427.1| hypothetical protein Csa_4G053260 [Cucumis sativus]	AT4G23990.1 | Symbols: ATCSLG3, CSLG3 | cellulose synthase like G3 | chr4:12456491-12460498 FORWARD LENGTH=751	sp|Q0WVN5|CSLG3_ARATH Cellulose synthase-like protein G3 OS=Arabidopsis thaliana GN=CSLG3 PE=2 SV=2	0.122262
Bhi09G000816	turquoise	chr9	IPR032454 Histone H2A, C-terminal domain; IPR032458 Histone H2A conserved site; IPR009072 Histone-fold; IPR007125 Histone H2A/H2B/H3; IPR002119 Histone H2A	-	gi|659101083|ref|XP_008451416.1| PREDICTED: histone H2AX-like [Cucumis melo]	AT1G08880.1 | Symbols: HTA5, H2AXA, G-H2AX, GAMMA-H2AX | Histone superfamily protein | chr1:2847144-2847676 REVERSE LENGTH=142	sp|P35063|H2AX_PICAB Histone H2AX OS=Picea abies PE=2 SV=1	0.121779
Bhi10G000501	brown	chr10	-	-	gi|1035422699|ref|XP_016903095.1| PREDICTED: uncharacterized protein LOC103501899 isoform X1 [Cucumis melo]	AT5G60150.1 | Symbols: | unknown protein; Has 1807 Blast hits to 1807 proteins in 277 species: Archae - 0; Bacteria - 0; Metazoa - 736; Fungi - 347; Plants - 385; Viruses - 0; Other Eukaryotes - 339 (source: NCBI BLink). | chr5:24218211-24223245 FORWARD LENGTH=1195	-	0.121767
Bhi02G000063	blue	chr2	IPR007199 Replication factor-A protein 1, N-terminal; IPR012340 Nucleic acid-binding, OB-fold; IPR004365 OB-fold nucleic acid binding domain, AA-tRNA synthetase-type; IPR031657 Replication protein A, OB domain; IPR004591 Replication factor A protein 1; IPR013955 Replication factor A, C-terminal	GO:0003677 DNA binding; GO:0005634 nucleus; GO:0006260 DNA replication;	gi|778656104|ref|XP_011648462.1| PREDICTED: replication protein A 70 kDa DNA-binding subunit B-like [Cucumis sativus] >gi|700208636|gb|KGN63732.1| hypothetical protein Csa_1G013800 [Cucumis sativus]	AT5G08020.1 | Symbols: ATRPA70B, RPA70B | RPA70-kDa subunit B | chr5:2572107-2574879 FORWARD LENGTH=604	sp|Q9SD82|RFA1B_ARATH Replication protein A 70 kDa DNA-binding subunit B OS=Arabidopsis thaliana GN=RPA1B PE=3 SV=1	0.121245
Bhi09G002762	brown	chr9	IPR009057 Homeodomain-like; IPR001005 SANT/Myb domain; IPR017930 Myb domain	GO:0003677 DNA binding;	gi|659103155|ref|XP_008452503.1| PREDICTED: transcriptional activator Myb-like [Cucumis melo]	AT3G50060.1 | Symbols: MYB77 | myb domain protein 77 | chr3:18558146-18559051 REVERSE LENGTH=301	sp|Q9FDW1|MYB44_ARATH Transcription factor MYB44 OS=Arabidopsis thaliana GN=MYB44 PE=2 SV=1	0.121089
Bhi11G001806	blue	chr11	IPR029688 Interactor of constitutive active ROPs	-	gi|449440061|ref|XP_004137803.1| PREDICTED: interactor of constitutive active ROPs 3 isoform X1 [Cucumis sativus] >gi|778683761|ref|XP_011651940.1| PREDICTED: interactor of constitutive active ROPs 3 isoform X1 [Cucumis sativus]	AT5G60210.2 | Symbols: RIP5 | ROP interactive partner 5 | chr5:24243529-24245889 REVERSE LENGTH=564	sp|Q9LSS5|ICR3_ARATH Interactor of constitutive active ROPs 3 OS=Arabidopsis thaliana GN=ICR3 PE=1 SV=1	0.120884
Bhi04G001843	turquoise	chr4	IPR019140 Mini-chromosome maintenance complex-binding protein	-	gi|1035414585|ref|XP_008456771.2| PREDICTED: mini-chromosome maintenance complex-binding protein [Cucumis melo]	AT2G40550.1 | Symbols: ETG1 | E2F target gene 1 | chr2:16934927-16938033 FORWARD LENGTH=589	sp|Q501D5|MCMBP_ARATH Mini-chromosome maintenance complex-binding protein OS=Arabidopsis thaliana GN=ETG1 PE=1 SV=1	0.120765
Bhi03G000305	brown	chr3	IPR004333 Transcription factor, SBP-box	GO:0003677 DNA binding; GO:0005634 nucleus;	gi|449434338|ref|XP_004134953.1| PREDICTED: squamosa promoter-binding protein 1 [Cucumis sativus] >gi|700194035|gb|KGN49239.1| hypothetical protein Csa_6G517960 [Cucumis sativus]	AT1G02065.1 | Symbols: SPL8 | squamosa promoter binding protein-like 8 | chr1:365625-367149 FORWARD LENGTH=333	sp|Q38741|SBP1_ANTMA Squamosa promoter-binding protein 1 OS=Antirrhinum majus GN=SBP1 PE=2 SV=1	0.120641
Bhi01G002619	yellow	chr1	IPR026992 Non-haem dioxygenase N-terminal domain; IPR027443 Isopenicillin N synthase-like	-	gi|778681312|ref|XP_004151051.2| PREDICTED: uncharacterized protein LOC101203918 [Cucumis sativus] >gi|700202904|gb|KGN58037.1| hypothetical protein Csa_3G454120 [Cucumis sativus]	AT1G79760.1 | Symbols: DTA4 | downstream target of AGL15-4 | chr1:30012054-30013042 FORWARD LENGTH=299	-	0.119963
Bhi05G001545	yellow	chr5	IPR001208 MCM domain; IPR004039 Rubredoxin-type fold; IPR012340 Nucleic acid-binding, OB-fold; IPR027417 P-loop containing nucleoside triphosphate hydrolase; IPR018525 Mini-chromosome maintenance, conserved site; IPR008047 Mini-chromosome maintenance complex protein 4; IPR027925 MCM N-terminal domain; IPR031327 Mini-chromosome maintenance protein	GO:0003677 DNA binding; GO:0005524 ATP binding; GO:0006260 DNA replication;	gi|659094456|ref|XP_008448069.1| PREDICTED: DNA replication licensing factor MCM4 isoform X1 [Cucumis melo]	AT2G16440.1 | Symbols: MCM4 | Minichromosome maintenance (MCM2/3/5) family protein | chr2:7126536-7130665 REVERSE LENGTH=847	sp|Q0WVF5|MCM4_ARATH DNA replication licensing factor MCM4 OS=Arabidopsis thaliana GN=MCM4 PE=1 SV=1	0.119163
Bhi03G001051	yellow	chr3	IPR006501 Pectinesterase inhibitor domain	GO:0004857 enzyme inhibitor activity;	gi|659080910|ref|XP_008441045.1| PREDICTED: cell wall / vacuolar inhibitor of fructosidase 2 [Cucumis melo]	AT5G64620.1 | Symbols: C/VIF2, ATC/VIF2 | cell wall / vacuolar inhibitor of fructosidase 2 | chr5:25831875-25832417 FORWARD LENGTH=180	sp|O49603|CVIF2_ARATH Cell wall / vacuolar inhibitor of fructosidase 2 OS=Arabidopsis thaliana GN=C/VIF2 PE=1 SV=1	0.119103
Bhi04G000334	red	chr4	-	-	gi|659087733|ref|XP_008444608.1| PREDICTED: uncharacterized protein LOC103487879 [Cucumis melo]	AT1G45688.1 | Symbols: | unknown protein; FUNCTIONS IN: molecular_function unknown; INVOLVED IN: biological_process unknown; LOCATED IN: plasma membrane; EXPRESSED IN: 22 plant structures; EXPRESSED DURING: 13 growth stages; BEST Arabidopsis thaliana protein match is: unknown protein (TAIR:AT5G42860.1); Has 258 Blast hits to 242 proteins in 39 species: Archae - 0; Bacteria - 11; Metazoa - 10; Fun…	-	0.118829
Bhi09G000682	red	chr9	IPR001208 MCM domain; IPR031327 Mini-chromosome maintenance protein; IPR018525 Mini-chromosome maintenance, conserved site; IPR012340 Nucleic acid-binding, OB-fold; IPR008050 DNA replication licensing factor Mcm7; IPR027925 MCM N-terminal domain; IPR027417 P-loop containing nucleoside triphosphate hydrolase	GO:0003677 DNA binding; GO:0005524 ATP binding; GO:0006260 DNA replication;	gi|659101206|ref|XP_008451483.1| PREDICTED: DNA replication licensing factor MCM7 [Cucumis melo]	AT4G02060.2 | Symbols: PRL | Minichromosome maintenance (MCM2/3/5) family protein | chr4:901484-905297 FORWARD LENGTH=716	sp|B8BMI1|MCM7_ORYSI DNA replication licensing factor MCM7 OS=Oryza sativa subsp. indica GN=MCM7 PE=3 SV=1	0.118475
Bhi01G002193	turquoise	chr1	IPR001128 Cytochrome P450; IPR017972 Cytochrome P450, conserved site; IPR002401 Cytochrome P450, E-class, group I	GO:0005506 iron ion binding; GO:0016705 oxidoreductase activity, acting on paired donors, with incorporation or reduction of molecular oxygen; GO:0020037 heme binding; GO:0055114 oxidation-reduction process;	gi|659127987|ref|XP_008463991.1| PREDICTED: cytochrome P450 71A1-like [Cucumis melo]	AT5G07990.1 | Symbols: TT7, CYP75B1, D501 | Cytochrome P450 superfamily protein | chr5:2560437-2562859 FORWARD LENGTH=513	sp|Q9SD85|F3PH_ARATH Flavonoid 3'-monooxygenase OS=Arabidopsis thaliana GN=CYP75B1 PE=1 SV=1	0.118037
Bhi12G001910	blue	chr12	IPR004333 Transcription factor, SBP-box	GO:0003677 DNA binding; GO:0005634 nucleus;	gi|659116546|ref|XP_008458127.1| PREDICTED: squamosa promoter-binding-like protein 8 [Cucumis melo] >gi|659116548|ref|XP_008458128.1| PREDICTED: squamosa promoter-binding-like protein 8 [Cucumis melo]	AT1G02065.1 | Symbols: SPL8 | squamosa promoter binding protein-like 8 | chr1:365625-367149 FORWARD LENGTH=333	sp|Q8GXL3|SPL8_ARATH Squamosa promoter-binding-like protein 8 OS=Arabidopsis thaliana GN=SPL8 PE=1 SV=2	0.117868
Bhi06G001583	turquoise	chr6	IPR001208 MCM domain; IPR018525 Mini-chromosome maintenance, conserved site; IPR012340 Nucleic acid-binding, OB-fold; IPR031327 Mini-chromosome maintenance protein; IPR027417 P-loop containing nucleoside triphosphate hydrolase; IPR008048 DNA replication licensing factor Mcm; IPR027925 MCM N-terminal domain	GO:0003677 DNA binding; GO:0005524 ATP binding; GO:0006260 DNA replication; GO:0003688 DNA replication origin binding;	gi|449443007|ref|XP_004139272.1| PREDICTED: DNA replication licensing factor MCM5 [Cucumis sativus] >gi|700205622|gb|KGN60741.1| hypothetical protein Csa_2G009300 [Cucumis sativus]	AT2G07690.1 | Symbols: MCM5 | Minichromosome maintenance (MCM2/3/5) family protein | chr2:3523379-3527388 REVERSE LENGTH=727	sp|O80786|MCM5_ARATH DNA replication licensing factor MCM5 OS=Arabidopsis thaliana GN=MCM5 PE=1 SV=1	0.117688
Bhi02G000612	green	chr2	IPR014044 CAP domain; IPR001283 Cysteine-rich secretory protein, allergen V5/Tpx-1-related; IPR002413 Ves allergen; IPR018244 Allergen V5/Tpx-1-related, conserved site	-	gi|449457125|ref|XP_004146299.1| PREDICTED: pathogenesis-related protein PR-1 [Cucumis sativus] >gi|700210327|gb|KGN65423.1| hypothetical protein Csa_1G420360 [Cucumis sativus]	AT4G25780.1 | Symbols: | CAP (Cysteine-rich secretory proteins, Antigen 5, and Pathogenesis-related 1 protein) superfamily protein | chr4:13121107-13121679 FORWARD LENGTH=190	sp|Q40374|PR1_MEDTR Pathogenesis-related protein PR-1 OS=Medicago truncatula GN=PR-1 PE=2 SV=1	0.117225
Bhi06G001733	turquoise	chr6	IPR013210 Leucine-rich repeat-containing N-terminal, plant-type; IPR032675 Leucine-rich repeat domain, L domain-like; IPR001611 Leucine-rich repeat	-	gi|778665943|ref|XP_004139428.2| PREDICTED: leucine-rich repeat extensin-like protein 4 [Cucumis sativus] >gi|700205508|gb|KGN60627.1| hypothetical protein Csa_2G004760 [Cucumis sativus]	AT3G24480.1 | Symbols: | Leucine-rich repeat (LRR) family protein | chr3:8901154-8902638 REVERSE LENGTH=494	sp|Q9LHF1|LRX4_ARATH Leucine-rich repeat extensin-like protein 4 OS=Arabidopsis thaliana GN=LRX4 PE=2 SV=1	0.117027
Bhi10G000548	yellow	chr10	IPR009072 Histone-fold; IPR001951 Histone H4; IPR019809 Histone H4, conserved site	GO:0046982 protein heterodimerization activity;	gi|1137227100|gb|OMO91300.1| Histone H4 [Corchorus olitorius]	AT5G59970.1 | Symbols: | Histone superfamily protein | chr5:24146352-24146663 REVERSE LENGTH=103	sp|P0CG89|H4_SOYBN Histone H4 OS=Glycine max PE=3 SV=1	0.116413
Bhi08G001548	turquoise	chr8	IPR009057 Homeodomain-like; IPR017930 Myb domain; IPR001005 SANT/Myb domain	GO:0003677 DNA binding;	gi|449457793|ref|XP_004146632.1| PREDICTED: protein ODORANT1-like [Cucumis sativus]	AT4G21440.1 | Symbols: ATMYB102, ATM4, MYB102 | MYB-like 102 | chr4:11418425-11419652 REVERSE LENGTH=350	sp|Q8GWP0|MYB39_ARATH Transcription factor MYB39 OS=Arabidopsis thaliana GN=MYB39 PE=2 SV=1	0.116401
Bhi12G000605	yellow	chr12	IPR004864 Late embryogenesis abundant protein, LEA-14	-	gi|449456439|ref|XP_004145957.1| PREDICTED: protein YLS9 [Cucumis sativus] >gi|700194645|gb|KGN49822.1| NDR1/HIN1-like protein [Cucumis sativus]	AT5G53730.1 | Symbols: | Late embryogenesis abundant (LEA) hydroxyproline-rich glycoprotein family | chr5:21808072-21808713 REVERSE LENGTH=213	sp|Q9SJ54|NHL12_ARATH NDR1/HIN1-like protein 12 OS=Arabidopsis thaliana GN=NHL12 PE=2 SV=1	0.116155
Bhi11G001993	brown	chr11	-	-	-	-	-	0.116147
Bhi11G000360	brown	chr11	-	-	gi|778688359|ref|XP_011652729.1| PREDICTED: extensin-like [Cucumis sativus] >gi|700200887|gb|KGN56020.1| Lipid binding protein [Cucumis sativus]	-	sp|Q1LUA6|TRIO_DANRE Triple functional domain protein OS=Danio rerio GN=trio PE=3 SV=1	0.11605
Bhi02G000817	blue	chr2	IPR013026 Tetratricopeptide repeat-containing domain; IPR011990 Tetratricopeptide-like helical domain	GO:0005515 protein binding;	gi|778730584|ref|XP_004150036.2| PREDICTED: uncharacterized protein LOC101218093 [Cucumis sativus]	AT5G20190.1 | Symbols: | Tetratricopeptide repeat (TPR)-like superfamily protein | chr5:6814093-6815171 FORWARD LENGTH=290	-	0.115906
Bhi12G000447	red	chr12	IPR000270 PB1 domain; IPR003311 AUX/IAA protein	GO:0005515 protein binding;	gi|307136492|gb|ADN34292.1| auxin-responsive protein IAA [Cucumis melo subsp. melo]	AT5G43700.1 | Symbols: ATAUX2-11, IAA4 | AUX/IAA transcriptional regulator family protein | chr5:17550465-17551206 FORWARD LENGTH=186	sp|O24542|AX22D_VIGRR Auxin-induced protein 22D OS=Vigna radiata var. radiata GN=AUX22D PE=2 SV=1	0.115756
Bhi02G001380	red	chr2	IPR001525 C-5 cytosine methyltransferase; IPR001025 Bromo adjacent homology (BAH) domain; IPR000953 Chromo/chromo shadow domain; IPR029063 S-adenosyl-L-methionine-dependent methyltransferase; IPR023779 Chromo domain, conserved site; IPR016197 Chromo domain-like; IPR018117 DNA methylase, C-5 cytosine-specific, active site; IPR023780 Chromo domain	GO:0008168 methyltransferase activity;	gi|659100447|ref|XP_008451103.1| PREDICTED: DNA (cytosine-5)-methyltransferase CMT3 [Cucumis melo]	AT1G69770.1 | Symbols: CMT3 | chromomethylase 3 | chr1:26248496-26253519 REVERSE LENGTH=839	sp|Q94F88|CMT3_ARATH DNA (cytosine-5)-methyltransferase CMT3 OS=Arabidopsis thaliana GN=CMT3 PE=1 SV=2	0.115192
Bhi04G001652	yellow	chr4	IPR000164 Histone H3/CENP-A; IPR007125 Histone H2A/H2B/H3; IPR009072 Histone-fold	GO:0000786 nucleosome; GO:0003677 DNA binding;	gi|357502337|ref|XP_003621457.1| core histone H2A/H2B/H3/H4 [Medicago truncatula] >gi|355496472|gb|AES77675.1| core histone H2A/H2B/H3/H4 [Medicago truncatula]	AT5G65360.1 | Symbols: | Histone superfamily protein | chr5:26120099-26120509 REVERSE LENGTH=136	sp|P68428|H32_WHEAT Histone H3.2 OS=Triticum aestivum PE=1 SV=2	0.114655
Bhi08G000017	turquoise	chr8	IPR002198 Short-chain dehydrogenase/reductase SDR; IPR020904 Short-chain dehydrogenase/reductase, conserved site; IPR002347 Glucose/ribitol dehydrogenase; IPR016040 NAD(P)-binding domain	GO:0008152 metabolic process; GO:0016491 oxidoreductase activity;	gi|700209866|gb|KGN64962.1| TASSELSEED2-like protein [Cucumis sativus]	AT3G51680.1 | Symbols: | NAD(P)-binding Rossmann-fold superfamily protein | chr3:19173622-19174667 REVERSE LENGTH=303	sp|Q94KL7|SILD_FORIN Secoisolariciresinol dehydrogenase (Fragment) OS=Forsythia intermedia PE=1 SV=1	0.114382
Bhi02G000261	yellow	chr2	-	-	gi|659105840|ref|XP_008453185.1| PREDICTED: uncharacterized protein LOC103493976 [Cucumis melo]	AT5G62550.1 | Symbols: | unknown protein; FUNCTIONS IN: molecular_function unknown; INVOLVED IN: biological_process unknown; LOCATED IN: plasma membrane; EXPRESSED IN: 17 plant structures; EXPRESSED DURING: 9 growth stages; Has 14949 Blast hits to 9947 proteins in 971 species: Archae - 43; Bacteria - 3248; Metazoa - 4424; Fungi - 1542; Plants - 562; Viruses - 55; Other Eukaryotes - 5075 (source: …	-	0.11427
Bhi05G000516	turquoise	chr5	IPR011032 GroES-like; IPR002085 Alcohol dehydrogenase superfamily, zinc-type; IPR016040 NAD(P)-binding domain; IPR020843 Polyketide synthase, enoylreductase domain; IPR013149 Alcohol dehydrogenase, C-terminal	-	gi|659131567|ref|XP_008465751.1| PREDICTED: 2-alkenal reductase (NADP(+)-dependent)-like [Cucumis melo]	AT5G17000.1 | Symbols: | Zinc-binding dehydrogenase family protein | chr5:5584983-5586991 REVERSE LENGTH=345	sp|Q9SLN8|DBR_TOBAC 2-alkenal reductase (NADP(+)-dependent) OS=Nicotiana tabacum GN=DBR PE=1 SV=1	0.114091
Bhi03G000061	red	chr3	IPR027417 P-loop containing nucleoside triphosphate hydrolase; IPR018525 Mini-chromosome maintenance, conserved site; IPR012340 Nucleic acid-binding, OB-fold; IPR008046 DNA replication licensing factor Mcm3; IPR031327 Mini-chromosome maintenance protein; IPR003593 AAA+ ATPase domain; IPR001208 MCM domain; IPR027925 MCM N-terminal domain	-	gi|659078290|ref|XP_008439647.1| PREDICTED: DNA replication licensing factor MCM3 [Cucumis melo] >gi|659078292|ref|XP_008439649.1| PREDICTED: DNA replication licensing factor MCM3 [Cucumis melo]	AT5G46280.1 | Symbols: MCM3 | Minichromosome maintenance (MCM2/3/5) family protein | chr5:18769902-18773606 REVERSE LENGTH=776	sp|Q43704|MCM31_MAIZE DNA replication licensing factor MCM3 homolog 1 OS=Zea mays GN=ROA1 PE=2 SV=2	0.114025
Bhi01G000552	red	chr1	IPR000232 Heat shock factor (HSF)-type, DNA-binding; IPR011991 Winged helix-turn-helix DNA-binding domain; IPR027725 Heat shock transcription factor family	GO:0003700 transcription factor activity, sequence-specific DNA binding; GO:0005634 nucleus; GO:0006355 regulation of transcription, DNA-templated; GO:0043565 sequence-specific DNA binding;	gi|449433295|ref|XP_004134433.1| PREDICTED: heat stress transcription factor A-6b [Cucumis sativus] >gi|700201810|gb|KGN56943.1| hypothetical protein Csa_3G146290 [Cucumis sativus]	AT3G22830.1 | Symbols: AT-HSFA6B, HSFA6B | heat shock transcription factor A6B | chr3:8078981-8080895 FORWARD LENGTH=406	sp|Q9LUH8|HFA6B_ARATH Heat stress transcription factor A-6b OS=Arabidopsis thaliana GN=HSFA6b PE=2 SV=1	0.114016
Bhi05G000204	red	chr5	IPR007125 Histone H2A/H2B/H3; IPR002119 Histone H2A; IPR009072 Histone-fold; IPR032454 Histone H2A, C-terminal domain	GO:0003677 DNA binding;	gi|449455262|ref|XP_004145372.1| PREDICTED: histone H2A variant 1 [Cucumis sativus] >gi|449455264|ref|XP_004145373.1| PREDICTED: histone H2A variant 1 [Cucumis sativus] >gi|659096920|ref|XP_008449356.1| PREDICTED: histone H2A variant 1 [Cucumis melo] >gi|659096924|ref|XP_008449358.1| PREDICTED: histone H2A variant 1 [Cucumis melo] >gi|778669026|ref|XP_011649183.1| PREDICTED: histone H2A variant 1…	AT3G54560.1 | Symbols: HTA11 | histone H2A 11 | chr3:20196532-20197466 FORWARD LENGTH=136	sp|O23628|H2AV1_ARATH Histone H2A variant 1 OS=Arabidopsis thaliana GN=H2AV PE=1 SV=1	0.113859
Bhi08G001075	yellow	chr8	IPR029063 S-adenosyl-L-methionine-dependent methyltransferase; IPR025771 Phosphoethanolamine N-methyltransferase; IPR013216 Methyltransferase type 11	-	gi|659066848|ref|XP_008464197.1| PREDICTED: phosphoethanolamine N-methyltransferase 1-like [Cucumis melo]	AT3G18000.1 | Symbols: NMT1, XPL1, PEAMT | S-adenosyl-L-methionine-dependent methyltransferases superfamily protein | chr3:6154578-6157331 FORWARD LENGTH=491	sp|Q9FR44|PEAM1_ARATH Phosphoethanolamine N-methyltransferase 1 OS=Arabidopsis thaliana GN=NMT1 PE=1 SV=1	0.11373
Bhi11G001088	yellow	chr11	IPR020845 AMP-binding, conserved site; IPR000873 AMP-dependent synthetase/ligase	-	gi|1035403907|ref|XP_016900385.1| PREDICTED: long chain acyl-CoA synthetase 1 [Cucumis melo] >gi|1035403909|ref|XP_016900386.1| PREDICTED: long chain acyl-CoA synthetase 1 [Cucumis melo]	AT2G47240.2 | Symbols: LACS1 | AMP-dependent synthetase and ligase family protein | chr2:19393835-19397616 FORWARD LENGTH=660	sp|O22898|LACS1_ARATH Long chain acyl-CoA synthetase 1 OS=Arabidopsis thaliana GN=LACS1 PE=2 SV=1	0.113453
Bhi11G002139	brown	chr11	IPR001128 Cytochrome P450	GO:0005506 iron ion binding; GO:0016705 oxidoreductase activity, acting on paired donors, with incorporation or reduction of molecular oxygen; GO:0020037 heme binding; GO:0055114 oxidation-reduction process;	gi|449460141|ref|XP_004147804.1| PREDICTED: cytochrome P450 CYP82D47-like [Cucumis sativus] >gi|700204780|gb|KGN59913.1| hypothetical protein Csa_3G852620 [Cucumis sativus]	AT4G31940.1 | Symbols: CYP82C4 | cytochrome P450, family 82, subfamily C, polypeptide 4 | chr4:15452040-15453966 FORWARD LENGTH=524	sp|Q9SZ46|C82C4_ARATH Cytochrome P450 82C4 OS=Arabidopsis thaliana GN=CYP82C4 PE=2 SV=1	0.113201
Bhi06G000714	turquoise	chr6	-	-	gi|659131561|ref|XP_008465748.1| PREDICTED: uncharacterized protein LOC103503357 [Cucumis melo]	-	-	0.113167
Bhi12G001273	yellow	chr12	IPR006380 Sucrose-phosphate synthase; IPR001296 Glycosyl transferase, family 1; IPR000368 Sucrose synthase; IPR023214 HAD-like domain; IPR012819 Sucrose phosphate synthase, plant	-	gi|793420966|ref|NP_001292660.1| probable sucrose-phosphate synthase 2 [Cucumis sativus] >gi|448278149|gb|AGE43981.1| sucrose phosphate synthase 1 [Cucumis sativus]	AT1G04920.1 | Symbols: ATSPS3F, SPS3F | sucrose phosphate synthase 3F | chr1:1391674-1395756 REVERSE LENGTH=1062	sp|O04933|SPSA2_CRAPL Probable sucrose-phosphate synthase 2 OS=Craterostigma plantagineum GN=SPS2 PE=2 SV=1	0.11264
BhiUN446G55	green	Contig446	IPR013087 Zinc finger C2H2-type/integrase DNA-binding domain; IPR022755 Zinc finger, double-stranded RNA binding; IPR015880 Zinc finger, C2H2-like; IPR007087 Zinc finger, C2H2	GO:0003676 nucleic acid binding;	gi|449445278|ref|XP_004140400.1| PREDICTED: protein indeterminate-domain 5, chloroplastic [Cucumis sativus] >gi|700195638|gb|KGN50815.1| hypothetical protein Csa_5G270900 [Cucumis sativus]	AT2G02070.1 | Symbols: AtIDD5, IDD5 | indeterminate(ID)-domain 5 | chr2:505523-509154 FORWARD LENGTH=602	sp|Q9ZUL3|IDD5_ARATH Protein indeterminate-domain 5, chloroplastic OS=Arabidopsis thaliana GN=IDD5 PE=1 SV=1	0.112618
Bhi08G001843	turquoise	chr8	IPR029986 Protein trichome birefringence-like 37/38; IPR026057 PC-Esterase; IPR029962 Trichome birefringence-like family; IPR025846 PMR5 N-terminal domain	-	gi|449462645|ref|XP_004149051.1| PREDICTED: protein trichome birefringence-like 37 [Cucumis sativus] >gi|700210551|gb|KGN65647.1| hypothetical protein Csa_1G478060 [Cucumis sativus]	AT2G34070.1 | Symbols: TBL37 | TRICHOME BIREFRINGENCE-LIKE 37 | chr2:14387631-14390160 REVERSE LENGTH=385	sp|O22960|TBL37_ARATH Protein trichome birefringence-like 37 OS=Arabidopsis thaliana GN=TBL37 PE=2 SV=2	0.111795
Bhi02G000976	turquoise	chr2	IPR003311 AUX/IAA protein; IPR000270 PB1 domain	GO:0005634 nucleus; GO:0006355 regulation of transcription, DNA-templated;	gi|659125559|ref|XP_008462746.1| PREDICTED: auxin-responsive protein IAA27 [Cucumis melo]	AT4G29080.1 | Symbols: PAP2, IAA27 | phytochrome-associated protein 2 | chr4:14323665-14325213 REVERSE LENGTH=305	sp|Q9ZSY8|IAA27_ARATH Auxin-responsive protein IAA27 OS=Arabidopsis thaliana GN=IAA27 PE=1 SV=1	0.111007
Bhi07G000162	red	chr7	IPR016055 Alpha-D-phosphohexomutase, alpha/beta/alpha I/II/III; IPR005844 Alpha-D-phosphohexomutase, alpha/beta/alpha domain I	GO:0005975 carbohydrate metabolic process; GO:0016868 intramolecular transferase activity, phosphotransferases;	gi|1191784867|ref|XP_020966912.1| LOW QUALITY PROTEIN: phosphoglucomutase, chloroplastic [Arachis ipaensis]	AT5G51820.1 | Symbols: PGM, ATPGMP, PGM1, STF1 | phosphoglucomutase | chr5:21063531-21067933 REVERSE LENGTH=623	sp|Q9M4G5|PGMP_SOLTU Phosphoglucomutase, chloroplastic OS=Solanum tuberosum GN=PGMP PE=2 SV=1	0.109477
Bhi02G001340	red	chr2	IPR000164 Histone H3/CENP-A; IPR009072 Histone-fold; IPR007125 Histone H2A/H2B/H3	GO:0000786 nucleosome; GO:0003677 DNA binding;	gi|1002258326|ref|XP_015633495.1| PREDICTED: histone H3-like centromeric protein CSE4 [Oryza sativa Japonica Group] >gi|937914261|dbj|BAS89180.1| Os04g0419600 [Oryza sativa Japonica Group]	AT5G65360.1 | Symbols: | Histone superfamily protein | chr5:26120099-26120509 REVERSE LENGTH=136	sp|Q76MV0|H32_TOBAC Histone H3.2 OS=Nicotiana tabacum GN=B34 PE=1 SV=1	0.109173
BhiUN737G9	turquoise	Contig737	IPR006501 Pectinesterase inhibitor domain; IPR011050 Pectin lyase fold/virulence factor; IPR000070 Pectinesterase, catalytic; IPR012334 Pectin lyase fold; IPR018040 Pectinesterase, active site	GO:0004857 enzyme inhibitor activity;	gi|659075527|ref|XP_008438193.1| PREDICTED: pectinesterase 2 [Cucumis melo]	AT2G45220.1 | Symbols: | Plant invertase/pectin methylesterase inhibitor superfamily | chr2:18644281-18646394 REVERSE LENGTH=511	sp|O04887|PME2_CITSI Pectinesterase 2 OS=Citrus sinensis GN=PECS-2.1 PE=2 SV=1	0.108453
Bhi11G000105	blue	chr11	IPR001789 Signal transduction response regulator, receiver domain; IPR001005 SANT/Myb domain; IPR017930 Myb domain; IPR009057 Homeodomain-like; IPR011006 CheY-like superfamily; IPR006447 Myb domain, plants	GO:0000160 phosphorelay signal transduction system;	gi|659095727|ref|XP_008448736.1| PREDICTED: two-component response regulator-like APRR2 isoform X1 [Cucumis melo]	AT4G18020.6 | Symbols: APRR2 | CheY-like two-component responsive regulator family protein | chr4:10003738-10006682 REVERSE LENGTH=535	sp|Q6LA43|APRR2_ARATH Two-component response regulator-like APRR2 OS=Arabidopsis thaliana GN=APRR2 PE=2 SV=2	0.107755
Bhi03G000935	blue	chr3	IPR016040 NAD(P)-binding domain; IPR002587 Myo-inositol-1-phosphate synthase; IPR013021 Myo-inositol-1-phosphate synthase, GAPDH-like	-	gi|659080134|ref|XP_008440628.1| PREDICTED: inositol-3-phosphate synthase [Cucumis melo]	AT5G10170.1 | Symbols: ATMIPS3, MIPS3 | myo-inositol-1-phosphate synthase 3 | chr5:3187538-3190161 REVERSE LENGTH=510	sp|Q9LW96|INO1_TOBAC Inositol-3-phosphate synthase OS=Nicotiana tabacum PE=2 SV=1	0.106188
Bhi02G001241	yellow	chr2	IPR007312 Phosphoesterase; IPR017850 Alkaline-phosphatase-like, core domain	GO:0016788 hydrolase activity, acting on ester bonds;	gi|778663829|ref|XP_004139131.2| PREDICTED: non-specific phospholipase C2 [Cucumis sativus] >gi|700211452|gb|KGN66548.1| hypothetical protein Csa_1G629050 [Cucumis sativus]	AT2G26870.1 | Symbols: NPC2 | non-specific phospholipase C2 | chr2:11457117-11459355 REVERSE LENGTH=514	sp|O81020|NPC2_ARATH Non-specific phospholipase C2 OS=Arabidopsis thaliana GN=NPC2 PE=2 SV=1	0.106132
Bhi11G001603	brown	chr11	IPR025749 Sphingomyelin synthase-like domain	-	gi|449439946|ref|XP_004137746.1| PREDICTED: phosphatidylinositol:ceramide inositolphosphotransferase 1 [Cucumis sativus] >gi|700203681|gb|KGN58814.1| hypothetical protein Csa_3G733190 [Cucumis sativus]	AT3G54020.1 | Symbols: AtIPCS1 | Arabidopsis Inositol phosphorylceramide synthase 1 | chr3:20006098-20008020 FORWARD LENGTH=305	sp|Q9M325|IPCS1_ARATH Phosphatidylinositol:ceramide inositolphosphotransferase 1 OS=Arabidopsis thaliana GN=IPCS1 PE=2 SV=1	0.105344
Bhi01G000663	yellow	chr1	IPR030184 WAT1-related protein	GO:0016021 integral component of membrane; GO:0022857 transmembrane transporter activity;	gi|778678668|ref|XP_011651009.1| PREDICTED: uncharacterized protein At4g15545 [Cucumis sativus] >gi|700201919|gb|KGN57052.1| hypothetical protein Csa_3G150810 [Cucumis sativus]	AT4G15545.1 | Symbols: | unknown protein; BEST Arabidopsis thaliana protein match is: unknown protein (TAIR:AT1G16520.1); Has 30201 Blast hits to 17322 proteins in 780 species: Archae - 12; Bacteria - 1396; Metazoa - 17338; Fungi - 3422; Plants - 5037; Viruses - 0; Other Eukaryotes - 2996 (source: NCBI BLink). | chr4:8875932-8877567 FORWARD LENGTH=337	sp|Q93W28|Y4554_ARATH Uncharacterized protein At4g15545 OS=Arabidopsis thaliana GN=At4g15545 PE=1 SV=1	0.105048
Bhi09G001859	turquoise	chr9	IPR029063 S-adenosyl-L-methionine-dependent methyltransferase; IPR005299 SAM dependent carboxyl methyltransferase	-	gi|449460239|ref|XP_004147853.1| PREDICTED: jasmonate O-methyltransferase [Cucumis sativus] >gi|700204853|gb|KGN59986.1| hypothetical protein Csa_3G859730 [Cucumis sativus]	AT1G19640.1 | Symbols: JMT | jasmonic acid carboxyl methyltransferase | chr1:6789166-6791708 REVERSE LENGTH=389	sp|Q9AR07|JMT_ARATH Jasmonate O-methyltransferase OS=Arabidopsis thaliana GN=JMT PE=1 SV=3	0.104972
Bhi04G000638	yellow	chr4	IPR002480 DAHP synthetase, class II	GO:0003849 3-deoxy-7-phosphoheptulonate synthase activity; GO:0009073 aromatic amino acid family biosynthetic process;	gi|449469845|ref|XP_004152629.1| PREDICTED: phospho-2-dehydro-3-deoxyheptonate aldolase 1, chloroplastic [Cucumis sativus] >gi|700207584|gb|KGN62703.1| hypothetical protein Csa_2G369040 [Cucumis sativus]	AT1G22410.1 | Symbols: | Class-II DAHP synthetase family protein | chr1:7912120-7914742 FORWARD LENGTH=527	sp|P27608|AROF_TOBAC Phospho-2-dehydro-3-deoxyheptonate aldolase 1, chloroplastic OS=Nicotiana tabacum GN=DHAPS-1 PE=2 SV=1	0.103976
Bhi05G000661	yellow	chr5	IPR002213 UDP-glucuronosyl/UDP-glucosyltransferase	GO:0008152 metabolic process; GO:0016758 transferase activity, transferring hexosyl groups;	gi|659110456|ref|XP_008455233.1| PREDICTED: 7-deoxyloganetin glucosyltransferase-like [Cucumis melo]	AT1G22340.1 | Symbols: AtUGT85A7, UGT85A7 | UDP-glucosyl transferase 85A7 | chr1:7890464-7892090 REVERSE LENGTH=487	sp|F8WKW1|UGT2_GARJA 7-deoxyloganetin glucosyltransferase OS=Gardenia jasminoides GN=UGT85A24 PE=1 SV=1	0.103865
Bhi07G001094	yellow	chr7	-	-	gi|659091551|ref|XP_008446606.1| PREDICTED: uncharacterized protein LOC103489289 [Cucumis melo]	AT1G68440.1 | Symbols: | unknown protein; BEST Arabidopsis thaliana protein match is: unknown protein (TAIR:AT1G25400.2); Has 86 Blast hits to 86 proteins in 29 species: Archae - 0; Bacteria - 6; Metazoa - 27; Fungi - 11; Plants - 24; Viruses - 0; Other Eukaryotes - 18 (source: NCBI BLink). | chr1:25658115-25659035 FORWARD LENGTH=306	-	0.101312
Bhi12G001007	green	chr12	IPR004182 GRAM domain; IPR011993 PH domain-like	-	gi|778702228|ref|XP_011655160.1| PREDICTED: GEM-like protein 4 isoform X1 [Cucumis sativus] >gi|700195767|gb|KGN50944.1| hypothetical protein Csa_5G352640 [Cucumis sativus]	AT5G08350.1 | Symbols: | GRAM domain-containing protein / ABA-responsive protein-related | chr5:2686417-2687175 REVERSE LENGTH=222	sp|Q9FTA0|GEML4_ARATH GEM-like protein 4 OS=Arabidopsis thaliana GN=At5g08350 PE=2 SV=1	0.101196
Bhi09G000925	brown	chr9	IPR029058 Alpha/Beta hydrolase fold; IPR002921 Fungal lipase-like domain	-	gi|778727500|ref|XP_004146954.2| PREDICTED: phospholipase A1-Igamma2, chloroplastic-like [Cucumis sativus] >gi|700189527|gb|KGN44760.1| hypothetical protein Csa_7G378490 [Cucumis sativus]	AT2G30550.2 | Symbols: | alpha/beta-Hydrolases superfamily protein | chr2:13014884-13017005 FORWARD LENGTH=529	sp|Q3EBR6|PLA16_ARATH Phospholipase A1-Igamma2, chloroplastic OS=Arabidopsis thaliana GN=At2g30550 PE=1 SV=2	0.100711
Bhi12G001557	red	chr12	IPR017853 Glycoside hydrolase superfamily; IPR013781 Glycoside hydrolase, catalytic domain; IPR001554 Glycoside hydrolase, family 14	-	gi|659117234|ref|XP_008458492.1| PREDICTED: inactive beta-amylase 9 [Cucumis melo]	AT5G18670.1 | Symbols: BMY3, BAM9 | beta-amylase 3 | chr5:6226138-6227999 FORWARD LENGTH=536	sp|Q8VYW2|BAM9_ARATH Inactive beta-amylase 9 OS=Arabidopsis thaliana GN=BAM9 PE=2 SV=1	0.100563
Bhi12G000360	black	chr12	IPR001128 Cytochrome P450; IPR002401 Cytochrome P450, E-class, group I	GO:0005506 iron ion binding; GO:0016705 oxidoreductase activity, acting on paired donors, with incorporation or reduction of molecular oxygen; GO:0020037 heme binding; GO:0055114 oxidation-reduction process;	gi|659073580|ref|XP_008437138.1| PREDICTED: flavonoid 3'-monooxygenase-like [Cucumis melo]	AT4G12320.1 | Symbols: CYP706A6 | cytochrome P450, family 706, subfamily A, polypeptide 6 | chr4:7314939-7316647 REVERSE LENGTH=518	sp|S4UX02|CYPH1_SALMI Ferruginol synthase OS=Salvia miltiorrhiza GN=CYP76AH1 PE=1 SV=1	0.100519
Bhi02G001846	green	chr2	IPR004963 Pectinacetylesterase/NOTUM	GO:0016787 hydrolase activity;	gi|449435591|ref|XP_004135578.1| PREDICTED: pectin acetylesterase 10 [Cucumis sativus] >gi|700210909|gb|KGN66005.1| hypothetical protein Csa_1G561360 [Cucumis sativus]	AT5G26670.1 | Symbols: | Pectinacetylesterase family protein | chr5:9318456-9320816 FORWARD LENGTH=416	sp|Q66GM8|PAE10_ARATH Pectin acetylesterase 10 OS=Arabidopsis thaliana GN=PAE10 PE=2 SV=1	0.100325
Bhi10G001673	green	chr10	-	-	gi|700206637|gb|KGN61756.1| hypothetical protein Csa_2G237740 [Cucumis sativus]	-	-	0.0999859
Bhi01G002645	green	chr1	IPR018108 Mitochondrial substrate/solute carrier; IPR023395 Mitochondrial carrier domain; IPR002067 Mitochondrial carrier protein	-	gi|659093369|ref|XP_008447505.1| PREDICTED: mitochondrial arginine transporter BAC2-like [Cucumis melo]	AT1G79900.1 | Symbols: ATMBAC2, BAC2 | Mitochondrial substrate carrier family protein | chr1:30052524-30053599 REVERSE LENGTH=296	sp|Q9CA93|BAC2_ARATH Mitochondrial arginine transporter BAC2 OS=Arabidopsis thaliana GN=BAC2 PE=1 SV=1	0.0999012
Bhi03G001320	turquoise	chr3	IPR000425 Major intrinsic protein; IPR023271 Aquaporin-like; IPR022357 Major intrinsic protein, conserved site	GO:0005215 transporter activity; GO:0006810 transport; GO:0016020 membrane;	gi|793422838|ref|NP_001292671.1| aquaporin PIP2-2 [Cucumis sativus] >gi|562745012|gb|AHB33479.1| plasma intrinsic protein 2-3 [Cucumis sativus] >gi|700192945|gb|KGN48149.1| hypothetical protein Csa_6G445140 [Cucumis sativus]	AT2G37170.1 | Symbols: PIP2B, PIP2;2 | plasma membrane intrinsic protein 2 | chr2:15613624-15614791 REVERSE LENGTH=285	sp|P43287|PIP22_ARATH Aquaporin PIP2-2 OS=Arabidopsis thaliana GN=PIP2-2 PE=1 SV=2	0.0995155
Bhi09G002663	brown	chr9	IPR006068 Cation-transporting P-type ATPase, C-terminal; IPR023299 P-type ATPase, cytoplasmic domain N; IPR024750 Calcium-transporting P-type ATPase, N-terminal autoinhibitory domain; IPR001757 P-type ATPase; IPR023214 HAD-like domain; IPR018303 P-type ATPase, phosphorylation site; IPR023298 P-type ATPase, transmembrane domain; IPR006408 P-type ATPase, subfamily IIB; IPR004014 Cation-transporting…	-	gi|659103521|ref|XP_008452643.1| PREDICTED: calcium-transporting ATPase 1, chloroplastic [Cucumis melo]	AT1G27770.1 | Symbols: ACA1, PEA1 | autoinhibited Ca2+-ATPase 1 | chr1:9671912-9676010 REVERSE LENGTH=1020	sp|Q37145|ACA1_ARATH Calcium-transporting ATPase 1, chloroplastic OS=Arabidopsis thaliana GN=ACA1 PE=1 SV=3	0.0995054
Bhi01G002406	green	chr1	IPR006814 Photosystem II PsbR	GO:0009523 photosystem II; GO:0009654 photosystem II oxygen evolving complex; GO:0015979 photosynthesis; GO:0042651 thylakoid membrane;	gi|1021559435|ref|XP_016171002.1| photosystem II 10 kDa polypeptide, chloroplastic [Arachis ipaensis]	AT1G79040.1 | Symbols: PSBR | photosystem II subunit R | chr1:29736085-29736781 FORWARD LENGTH=140	sp|Q40519|PSBR_TOBAC Photosystem II 10 kDa polypeptide, chloroplastic OS=Nicotiana tabacum GN=PSBR PE=2 SV=1	0.0993819
Bhi01G002707	turquoise	chr1	-	-	-	-	-	0.0992773
Bhi11G001265	brown	chr11	IPR008045 DNA replication licensing factor Mcm2; IPR027417 P-loop containing nucleoside triphosphate hydrolase; IPR031327 Mini-chromosome maintenance protein; IPR027925 MCM N-terminal domain; IPR012340 Nucleic acid-binding, OB-fold; IPR001208 MCM domain; IPR018525 Mini-chromosome maintenance, conserved site	GO:0003677 DNA binding; GO:0003678 DNA helicase activity; GO:0005524 ATP binding; GO:0005634 nucleus; GO:0006270 DNA replication initiation; GO:0042555 MCM complex;	gi|659130418|ref|XP_008465160.1| PREDICTED: DNA replication licensing factor MCM2 [Cucumis melo]	AT1G44900.1 | Symbols: MCM2, ATMCM2 | minichromosome maintenance (MCM2/3/5) family protein | chr1:16970291-16974457 FORWARD LENGTH=936	sp|B8BKI8|MCM2_ORYSI DNA replication licensing factor MCM2 OS=Oryza sativa subsp. indica GN=OsI_36121 PE=3 SV=1	0.0987053
Bhi09G002721	yellow	chr9	IPR029058 Alpha/Beta hydrolase fold; IPR002921 Fungal lipase-like domain	-	gi|659103296|ref|XP_008452564.1| PREDICTED: uncharacterized protein LOC103493550 [Cucumis melo]	AT1G45201.2 | Symbols: ATTLL1, TLL1 | triacylglycerol lipase-like 1 | chr1:17123889-17127497 FORWARD LENGTH=387	sp|O59952|LIP_THELA Lipase OS=Thermomyces lanuginosus GN=LIP PE=1 SV=1	0.0981598
Bhi05G000364	turquoise	chr5	IPR001611 Leucine-rich repeat; IPR003591 Leucine-rich repeat, typical subtype; IPR032675 Leucine-rich repeat domain, L domain-like	GO:0005515 protein binding;	gi|659131985|ref|XP_008465955.1| PREDICTED: plant intracellular Ras-group-related LRR protein 5-like [Cucumis melo]	AT4G35470.1 | Symbols: PIRL4 | plant intracellular ras group-related LRR 4 | chr4:16846531-16848448 FORWARD LENGTH=549	sp|Q8S7M7|PIRL5_ORYSJ Plant intracellular Ras-group-related LRR protein 5 OS=Oryza sativa subsp. japonica GN=IRL5 PE=2 SV=1	0.097707
Bhi03G000371	green	chr3	IPR006553 Leucine-rich repeat, cysteine-containing subtype; IPR032675 Leucine-rich repeat domain, L domain-like	-	gi|659078789|ref|XP_008439908.1| PREDICTED: protein AUXIN SIGNALING F-BOX 2-like [Cucumis melo]	AT1G12820.1 | Symbols: AFB3 | auxin signaling F-box 3 | chr1:4368879-4370780 REVERSE LENGTH=577	sp|Q9LPW7|AFB3_ARATH Protein AUXIN SIGNALING F-BOX 3 OS=Arabidopsis thaliana GN=AFB3 PE=1 SV=1	0.0971949
Bhi10G001858	blue	chr10	IPR020846 Major facilitator superfamily domain; IPR011701 Major facilitator superfamily	-	gi|449461421|ref|XP_004148440.1| PREDICTED: protein spinster [Cucumis sativus] >gi|700206962|gb|KGN62081.1| hypothetical protein Csa_2G296060 [Cucumis sativus]	AT4G36790.1 | Symbols: | Major facilitator superfamily protein | chr4:17336360-17338304 FORWARD LENGTH=489	sp|Q9GQQ0|SPIN_DROME Protein spinster OS=Drosophila melanogaster GN=spin PE=1 SV=1	0.0970465
Bhi11G000055	yellow	chr11	-	-	-	-	-	0.0966074
Bhi01G002837	turquoise	chr1	IPR000109 Proton-dependent oligopeptide transporter family; IPR020846 Major facilitator superfamily domain; IPR018456 PTR2 family proton/oligopeptide symporter, conserved site	GO:0005215 transporter activity; GO:0006810 transport; GO:0016020 membrane;	gi|778689719|ref|XP_011653004.1| PREDICTED: protein NRT1/ PTR FAMILY 6.1 [Cucumis sativus] >gi|778689722|ref|XP_011653005.1| PREDICTED: protein NRT1/ PTR FAMILY 6.1 [Cucumis sativus] >gi|700197798|gb|KGN52956.1| hypothetical protein Csa_4G007610 [Cucumis sativus]	AT5G13400.1 | Symbols: | Major facilitator superfamily protein | chr5:4296854-4299079 REVERSE LENGTH=624	sp|Q9LYR6|PTR49_ARATH Protein NRT1/ PTR FAMILY 6.1 OS=Arabidopsis thaliana GN=NPF6.1 PE=2 SV=1	0.0951821
Bhi02G001244	blue	chr2	-	-	-	-	-	0.0950362
Bhi01G000294	green	chr1	IPR013781 Glycoside hydrolase, catalytic domain; IPR001223 Glycoside hydrolase family 18, catalytic domain; IPR017853 Glycoside hydrolase superfamily	GO:0005975 carbohydrate metabolic process;	gi|1024423899|gb|ANB86003.1| chitinase 2 [Cucumis melo] >gi|1024424355|gb|ANB86005.1| chitinase [Cucumis melo]	AT5G24090.1 | Symbols: ATCHIA, CHIA | chitinase A | chr5:8143805-8145153 REVERSE LENGTH=302	sp|P29060|CHIA_TOBAC Acidic endochitinase OS=Nicotiana tabacum PE=1 SV=1	0.0940286
Bhi03G001421	brown	chr3	-	-	gi|778717506|ref|XP_011657706.1| PREDICTED: uncharacterized protein LOC105435886 [Cucumis sativus] >gi|700193059|gb|KGN48263.1| hypothetical protein Csa_6G452640 [Cucumis sativus]	AT3G52740.1 | Symbols: | unknown protein; BEST Arabidopsis thaliana protein match is: unknown protein (TAIR:AT3G44450.1); Has 65 Blast hits to 65 proteins in 13 species: Archae - 0; Bacteria - 0; Metazoa - 0; Fungi - 0; Plants - 65; Viruses - 0; Other Eukaryotes - 0 (source: NCBI BLink). | chr3:19546446-19546868 REVERSE LENGTH=140	-	0.0929305
Bhi07G001137	brown	chr7	IPR029044 Nucleotide-diphospho-sugar transferases; IPR002495 Glycosyl transferase, family 8	-	gi|659091449|ref|XP_008446556.1| PREDICTED: probable galacturonosyltransferase-like 3 [Cucumis melo]	AT1G13250.1 | Symbols: GATL3 | galacturonosyltransferase-like 3 | chr1:4528965-4530002 REVERSE LENGTH=345	sp|Q0V7R1|GATL3_ARATH Probable galacturonosyltransferase-like 3 OS=Arabidopsis thaliana GN=GATL3 PE=2 SV=1	0.0924665
BhiUN316G1	turquoise	Contig316	IPR011598 Myc-type, basic helix-loop-helix (bHLH) domain; IPR015660 Achaete-scute transcription factor-related	GO:0046983 protein dimerization activity;	gi|1035389960|ref|XP_008442634.2| PREDICTED: transcription factor bHLH118-like [Cucumis melo]	AT4G20970.1 | Symbols: | basic helix-loop-helix (bHLH) DNA-binding superfamily protein | chr4:11215259-11216212 FORWARD LENGTH=190	sp|Q9FLI1|BH036_ARATH Transcription factor bHLH36 OS=Arabidopsis thaliana GN=BHLH36 PE=2 SV=1	0.0920815
Bhi12G000088	turquoise	chr12	-	-	gi|700194809|gb|KGN49986.1| hypothetical protein Csa_5G148570 [Cucumis sativus]	AT4G24110.1 | Symbols: | unknown protein; Has 76 Blast hits to 76 proteins in 13 species: Archae - 0; Bacteria - 0; Metazoa - 1; Fungi - 0; Plants - 75; Viruses - 0; Other Eukaryotes - 0 (source: NCBI BLink). | chr4:12520010-12520762 REVERSE LENGTH=250	-	0.09102
Bhi02G001579	brown	chr2	IPR001878 Zinc finger, CCHC-type; IPR001005 SANT/Myb domain; IPR006447 Myb domain, plants; IPR009057 Homeodomain-like; IPR017930 Myb domain	GO:0003676 nucleic acid binding; GO:0008270 zinc ion binding; GO:0033588 Elongator holoenzyme complex; GO:0004642 phosphoribosylformylglycinamidine synthase activity;	gi|778662917|ref|XP_011659976.1| PREDICTED: putative uncharacterized protein DDB_G0277255 [Cucumis sativus]	AT5G56840.1 | Symbols: | myb-like transcription factor family protein | chr5:22980789-22982152 FORWARD LENGTH=233	sp|Q8S9H7|DIV_ANTMA Transcription factor DIVARICATA OS=Antirrhinum majus GN=DIVARICATA PE=2 SV=1	0.0909707
Bhi12G000787	brown	chr12	-	-	gi|778708615|ref|XP_011656246.1| PREDICTED: CLAVATA3/ESR (CLE)-related protein 17-like [Cucumis sativus] >gi|700196315|gb|KGN51492.1| hypothetical protein Csa_5G570370 [Cucumis sativus]	AT2G01505.1 | Symbols: CLE16 | CLAVATA3/ESR-RELATED 16 | chr2:228926-229237 REVERSE LENGTH=103	-	0.0906399
Bhi10G000641	green	chr10	IPR014729 Rossmann-like alpha/beta/alpha sandwich fold; IPR029055 Nucleophile aminohydrolases, N-terminal; IPR001962 Asparagine synthase; IPR017932 Glutamine amidotransferase type 2 domain	-	gi|659130620|ref|XP_008465262.1| PREDICTED: asparagine synthetase [glutamine-hydrolyzing] 1-like [Cucumis melo]	AT3G47340.1 | Symbols: ASN1, DIN6, AT-ASN1 | glutamine-dependent asparagine synthase 1 | chr3:17438136-17441043 REVERSE LENGTH=584	sp|P49092|ASNS1_LOTJA Asparagine synthetase [glutamine-hydrolyzing] 1 OS=Lotus japonicus GN=AS1 PE=2 SV=2	0.0901889
Bhi03G001252	brown	chr3	IPR006121 Heavy metal-associated domain, HMA	GO:0030001 metal ion transport; GO:0046872 metal ion binding;	gi|659068954|ref|XP_008447442.1| PREDICTED: uncharacterized protein LOC103489885 [Cucumis melo]	AT3G53530.1 | Symbols: NAKR3 | Chloroplast-targeted copper chaperone protein | chr3:19845199-19846583 FORWARD LENGTH=247	sp|O82089|CCH_ARATH Copper transport protein CCH OS=Arabidopsis thaliana GN=CCH PE=1 SV=1	0.0900531
Bhi08G000425	red	chr8	IPR017907 Zinc finger, RING-type, conserved site; IPR013083 Zinc finger, RING/FYVE/PHD-type; IPR001841 Zinc finger, RING-type	-	gi|778661695|ref|XP_011658560.1| PREDICTED: uncharacterized protein LOC101203772 [Cucumis sativus] >gi|700210706|gb|KGN65802.1| hypothetical protein Csa_1G530140 [Cucumis sativus]	AT3G47160.1 | Symbols: | RING/U-box superfamily protein | chr3:17360238-17361879 REVERSE LENGTH=245	sp|Q6IV56|RN141_DANRE RING finger protein 141 OS=Danio rerio GN=rnf141 PE=2 SV=2	0.0899039
BhiUN968G2	blue	Contig968	-	-	gi|700206484|gb|KGN61603.1| hypothetical protein Csa_2G176170 [Cucumis sativus]	-	-	0.0897998
Bhi10G001347	green	chr10	IPR003439 ABC transporter-like; IPR027417 P-loop containing nucleoside triphosphate hydrolase; IPR013525 ABC-2 type transporter; IPR017871 ABC transporter, conserved site; IPR003593 AAA+ ATPase domain	GO:0005524 ATP binding; GO:0016887 ATPase activity;	gi|659121923|ref|XP_008460882.1| PREDICTED: ABC transporter G family member 5 [Cucumis melo]	AT2G13610.1 | Symbols: | ABC-2 type transporter family protein | chr2:5673827-5675776 REVERSE LENGTH=649	sp|Q9SIT6|AB5G_ARATH ABC transporter G family member 5 OS=Arabidopsis thaliana GN=ABCG5 PE=2 SV=1	0.0892559
Bhi01G001441	green	chr1	IPR009057 Homeodomain-like; IPR001005 SANT/Myb domain; IPR017930 Myb domain	GO:0003677 DNA binding;	gi|659123267|ref|XP_008461573.1| PREDICTED: LOW QUALITY PROTEIN: transcription factor AS1-like [Cucumis melo]	AT2G37630.1 | Symbols: ATPHAN, AS1, ATMYB91, MYB91 | myb-like HTH transcriptional regulator family protein | chr2:15781798-15782901 REVERSE LENGTH=367	sp|O80931|AS1_ARATH Transcription factor AS1 OS=Arabidopsis thaliana GN=AS1 PE=1 SV=1	0.0869814
Bhi11G000943	turquoise	chr11	-	-	gi|700197604|gb|KGN52762.1| hypothetical protein Csa_4G000820 [Cucumis sativus]	-	-	0.0863516
Bhi12G002197	turquoise	chr12	IPR008998 Agglutinin domain; IPR023307 Aerolysin-like toxin, beta complex domain; IPR005830 Aerolysin	-	gi|659120440|ref|XP_008460195.1| PREDICTED: uncharacterized protein LOC103499080 [Cucumis melo]	-	-	0.0852801
Bhi11G001880	turquoise	chr11	-	-	gi|700203730|gb|KGN58863.1| hypothetical protein Csa_3G734160 [Cucumis sativus]	AT5G02220.1 | Symbols: | unknown protein; Has 30201 Blast hits to 17322 proteins in 780 species: Archae - 12; Bacteria - 1396; Metazoa - 17338; Fungi - 3422; Plants - 5037; Viruses - 0; Other Eukaryotes - 2996 (source: NCBI BLink). | chr5:441884-442102 REVERSE LENGTH=72	-	0.0848045
Bhi07G001079	turquoise	chr7	IPR001932 PPM-type phosphatase domain; IPR015655 Protein phosphatase 2C family	GO:0003824 catalytic activity;	gi|449434598|ref|XP_004135083.1| PREDICTED: probable protein phosphatase 2C 15 [Cucumis sativus] >gi|700196923|gb|KGN52100.1| hypothetical protein Csa_5G610350 [Cucumis sativus]	AT1G68410.2 | Symbols: | Protein phosphatase 2C family protein | chr1:25650262-25652255 REVERSE LENGTH=436	sp|Q9M9C6|P2C15_ARATH Probable protein phosphatase 2C 15 OS=Arabidopsis thaliana GN=At1g68410 PE=2 SV=1	0.0845884
Bhi10G000740	blue	chr10	-	-	gi|449444506|ref|XP_004140015.1| PREDICTED: uncharacterized protein LOC101202760 [Cucumis sativus] >gi|700191601|gb|KGN46805.1| hypothetical protein Csa_6G137580 [Cucumis sativus]	AT1G79160.1 | Symbols: | unknown protein; BEST Arabidopsis thaliana protein match is: unknown protein (TAIR:AT1G16500.1); Has 104 Blast hits to 102 proteins in 13 species: Archae - 0; Bacteria - 0; Metazoa - 0; Fungi - 0; Plants - 104; Viruses - 0; Other Eukaryotes - 0 (source: NCBI BLink). | chr1:29779862-29780668 REVERSE LENGTH=239	-	0.0844905
Bhi09G000220	turquoise	chr9	IPR003676 Small auxin-up RNA	GO:0009733 response to auxin;	gi|449447940|ref|XP_004141724.1| PREDICTED: uncharacterized protein LOC101209445 [Cucumis sativus] >gi|700190224|gb|KGN45457.1| hypothetical protein Csa_7G448680 [Cucumis sativus]	AT1G17345.1 | Symbols: | SAUR-like auxin-responsive protein family | chr1:5940525-5940920 FORWARD LENGTH=131	-	0.0822935
Bhi12G000671	brown	chr12	IPR027417 P-loop containing nucleoside triphosphate hydrolase; IPR003960 ATPase, AAA-type, conserved site; IPR003959 ATPase, AAA-type, core; IPR003593 AAA+ ATPase domain	-	gi|778699015|ref|XP_004145904.2| PREDICTED: nuclear valosin-containing protein-like isoform X1 [Cucumis sativus] >gi|700194733|gb|KGN49910.1| hypothetical protein Csa_5G139870 [Cucumis sativus]	AT4G28000.1 | Symbols: | P-loop containing nucleoside triphosphate hydrolases superfamily protein | chr4:13925456-13929280 FORWARD LENGTH=830	sp|Q6AZT2|SPAST_XENLA Spastin OS=Xenopus laevis GN=spast PE=2 SV=1	0.0820481
Bhi09G000521	black	chr9	-	-	gi|700189909|gb|KGN45142.1| hypothetical protein Csa_7G428790 [Cucumis sativus]	-	-	0.0810245
Bhi11G001578	blue	chr11	IPR023213 Chloramphenicol acetyltransferase-like domain; IPR003480 Transferase	-	gi|449439912|ref|XP_004137729.1| PREDICTED: uncharacterized acetyltransferase At3g50280 [Cucumis sativus] >gi|700203656|gb|KGN58789.1| hypothetical protein Csa_3G732470 [Cucumis sativus]	AT2G39980.1 | Symbols: | HXXXD-type acyl-transferase family protein | chr2:16688437-16689885 REVERSE LENGTH=482	sp|Q9SND9|Y3028_ARATH Uncharacterized acetyltransferase At3g50280 OS=Arabidopsis thaliana GN=At3g50280 PE=3 SV=1	0.0808297
Bhi06G000899	brown	chr6	-	-	-	-	-	0.0807391
Bhi10G000008	black	chr10	-	-	gi|659097359|ref|XP_008449582.1| PREDICTED: uncharacterized protein LOC103491422 [Cucumis melo]	AT2G27385.3 | Symbols: | Pollen Ole e 1 allergen and extensin family protein | chr2:11716697-11717285 REVERSE LENGTH=162	-	0.0807267
Bhi08G001279	turquoise	chr8	-	-	gi|449457729|ref|XP_004146600.1| PREDICTED: DNA ligase 1 isoform X1 [Cucumis sativus] >gi|700209579|gb|KGN64675.1| hypothetical protein Csa_1G073820 [Cucumis sativus]	AT2G33793.1 | Symbols: | unknown protein; Has 35333 Blast hits to 34131 proteins in 2444 species: Archae - 798; Bacteria - 22429; Metazoa - 974; Fungi - 991; Plants - 531; Viruses - 0; Other Eukaryotes - 9610 (source: NCBI BLink). | chr2:14297107-14299217 FORWARD LENGTH=212	-	0.0804949
Bhi01G002359	blue	chr1	IPR001128 Cytochrome P450; IPR002401 Cytochrome P450, E-class, group I; IPR017972 Cytochrome P450, conserved site	GO:0005506 iron ion binding; GO:0016705 oxidoreductase activity, acting on paired donors, with incorporation or reduction of molecular oxygen; GO:0020037 heme binding; GO:0055114 oxidation-reduction process;	gi|659101945|ref|XP_008451873.1| PREDICTED: abscisic acid 8'-hydroxylase 1 [Cucumis melo]	AT4G19230.1 | Symbols: CYP707A1 | cytochrome P450, family 707, subfamily A, polypeptide 1 | chr4:10521524-10523517 FORWARD LENGTH=467	sp|Q949P1|ABAH1_ARATH Abscisic acid 8'-hydroxylase 1 OS=Arabidopsis thaliana GN=CYP707A1 PE=2 SV=1	0.0799357
Bhi12G000361	turquoise	chr12	IPR001128 Cytochrome P450; IPR002401 Cytochrome P450, E-class, group I; IPR017972 Cytochrome P450, conserved site	GO:0005506 iron ion binding; GO:0016705 oxidoreductase activity, acting on paired donors, with incorporation or reduction of molecular oxygen; GO:0020037 heme binding; GO:0055114 oxidation-reduction process;	gi|449459692|ref|XP_004147580.1| PREDICTED: flavonoid 3'-monooxygenase-like [Cucumis sativus] >gi|700195029|gb|KGN50206.1| hypothetical protein Csa_5G159600 [Cucumis sativus]	AT4G12330.1 | Symbols: CYP706A7 | cytochrome P450, family 706, subfamily A, polypeptide 7 | chr4:7317776-7319658 REVERSE LENGTH=518	sp|Q9SD85|F3PH_ARATH Flavonoid 3'-monooxygenase OS=Arabidopsis thaliana GN=CYP75B1 PE=1 SV=1	0.0796083
Bhi01G000554	turquoise	chr1	-	-	gi|449432668|ref|XP_004134121.1| PREDICTED: EPIDERMAL PATTERNING FACTOR-like protein 4 [Cucumis sativus] >gi|700201812|gb|KGN56945.1| hypothetical protein Csa_3G146310 [Cucumis sativus]	AT4G14723.1 | Symbols: | BEST Arabidopsis thaliana protein match is: allergen-related (TAIR:AT3G22820.1); Has 35333 Blast hits to 34131 proteins in 2444 species: Archae - 798; Bacteria - 22429; Metazoa - 974; Fungi - 991; Plants - 531; Viruses - 0; Other Eukaryotes - 9610 (source: NCBI BLink). | chr4:8440167-8440693 FORWARD LENGTH=109	sp|Q2V3I3|EPFL4_ARATH EPIDERMAL PATTERNING FACTOR-like protein 4 OS=Arabidopsis thaliana GN=EPFL4 PE=1 SV=1	0.0795277
Bhi11G000581	turquoise	chr11	IPR012317 Poly(ADP-ribose) polymerase, catalytic domain; IPR007087 Zinc finger, C2H2	GO:0003950 NAD+ ADP-ribosyltransferase activity;	gi|659102792|ref|XP_008452316.1| PREDICTED: uncharacterized protein LOC103493380 [Cucumis melo]	AT5G54630.1 | Symbols: | zinc finger protein-related | chr5:22192607-22194260 REVERSE LENGTH=472	-	0.0793975
BhiUN316G61	green	Contig316	IPR011607 Methylglyoxal synthase-like domain; IPR002695 AICARFT/IMPCHase bienzyme; IPR024051 AICAR transformylase domain; IPR016193 Cytidine deaminase-like	-	gi|659067634|ref|XP_008440494.1| PREDICTED: bifunctional purine biosynthesis protein PurH [Cucumis melo] >gi|659067636|ref|XP_008440502.1| PREDICTED: bifunctional purine biosynthesis protein PurH [Cucumis melo] >gi|659067640|ref|XP_008440519.1| PREDICTED: bifunctional purine biosynthesis protein PurH [Cucumis melo] >gi|1035389758|ref|XP_016899930.1| PREDICTED: bifunctional purine biosynthesis pro…	AT2G35040.1 | Symbols: | AICARFT/IMPCHase bienzyme family protein | chr2:14765347-14768269 REVERSE LENGTH=596	sp|A9VRF5|PUR9_BACWK Bifunctional purine biosynthesis protein PurH OS=Bacillus weihenstephanensis (strain KBAB4) GN=purH PE=3 SV=1	0.0787194
Bhi03G001831	turquoise	chr3	IPR014718 Glycoside hydrolase-type carbohydrate-binding, subgroup; IPR011013 Galactose mutarotase-like domain	GO:0003824 catalytic activity; GO:0005975 carbohydrate metabolic process; GO:0030246 carbohydrate binding;	gi|449459648|ref|XP_004147558.1| PREDICTED: uncharacterized protein LOC101207678 isoform X1 [Cucumis sativus] >gi|700198785|gb|KGN53943.1| hypothetical protein Csa_4G192150 [Cucumis sativus]	AT1G55370.2 | Symbols: NDF5 | NDH-dependent cyclic electron flow 5 | chr1:20674852-20676071 FORWARD LENGTH=354	sp|Q9C503|NDF5_ARATH Protein NDH-DEPENDENT CYCLIC ELECTRON FLOW 5 OS=Arabidopsis thaliana GN=NDF5 PE=2 SV=1	0.0784145
Bhi05G001565	brown	chr5	-	-	gi|449438052|ref|XP_004136804.1| PREDICTED: uncharacterized GPI-anchored protein At4g28100-like [Cucumis sativus] >gi|700188339|gb|KGN43572.1| hypothetical protein Csa_7G046110 [Cucumis sativus]	AT4G28100.1 | Symbols: | unknown protein; FUNCTIONS IN: molecular_function unknown; INVOLVED IN: biological_process unknown; LOCATED IN: anchored to plasma membrane, anchored to membrane; EXPRESSED IN: 23 plant structures; EXPRESSED DURING: 14 growth stages; BEST Arabidopsis thaliana protein match is: unknown protein (TAIR:AT3G18050.1); Has 30201 Blast hits to 17322 proteins in 780 species: Archa…	sp|Q9SUC9|UGPI7_ARATH Uncharacterized GPI-anchored protein At4g28100 OS=Arabidopsis thaliana GN=At4g28100 PE=1 SV=1	0.0782825
Bhi12G001127	turquoise	chr12	IPR008333 Oxidoreductase, FAD-binding domain; IPR012137 Nitrate reductase NADH dependent; IPR018506 Cytochrome b5, heme-binding site; IPR001834 NADH:cytochrome b5 reductase (CBR); IPR001199 Cytochrome b5-like heme/steroid binding domain; IPR001709 Flavoprotein pyridine nucleotide cytochrome reductase; IPR005066 Moybdenum cofactor oxidoreductase, dimerisation; IPR017927 Ferredoxin reductase-type F…	-	gi|659120996|ref|XP_008460453.1| PREDICTED: nitrate reductase [NADH] [Cucumis melo]	AT1G37130.1 | Symbols: NIA2, B29, NIA2-1, CHL3, NR, NR2, ATNR2 | nitrate reductase 2 | chr1:14158617-14161652 FORWARD LENGTH=917	sp|P17569|NIA_CUCMA Nitrate reductase [NADH] OS=Cucurbita maxima PE=2 SV=1	0.0781619
Bhi03G000866	blue	chr3	IPR018108 Mitochondrial substrate/solute carrier; IPR002030 Mitochondrial brown fat uncoupling protein; IPR023395 Mitochondrial carrier domain	-	gi|449451397|ref|XP_004143448.1| PREDICTED: mitochondrial uncoupling protein 5 [Cucumis sativus] >gi|700193510|gb|KGN48714.1| Mitochondrial dicarboxylate carrier protein [Cucumis sativus]	AT2G22500.1 | Symbols: UCP5, ATPUMP5, DIC1 | uncoupling protein 5 | chr2:9563531-9564472 REVERSE LENGTH=313	sp|Q9SJY5|PUMP5_ARATH Mitochondrial uncoupling protein 5 OS=Arabidopsis thaliana GN=PUMP5 PE=2 SV=1	0.0780544
Bhi01G000739	yellow	chr1	IPR013083 Zinc finger, RING/FYVE/PHD-type; IPR001841 Zinc finger, RING-type	-	gi|449432878|ref|XP_004134225.1| PREDICTED: RING-H2 finger protein ATL2 [Cucumis sativus] >gi|700201998|gb|KGN57131.1| hypothetical protein Csa_3G164500 [Cucumis sativus]	AT3G16720.1 | Symbols: ATL2, TL2 | TOXICOS EN LEVADURA 2 | chr3:5692880-5693794 FORWARD LENGTH=304	sp|Q8L9T5|ATL2_ARATH RING-H2 finger protein ATL2 OS=Arabidopsis thaliana GN=ATL2 PE=2 SV=2	0.0769746
Bhi10G000148	green	chr10	IPR003613 U box domain; IPR016024 Armadillo-type fold; IPR013083 Zinc finger, RING/FYVE/PHD-type; IPR011989 Armadillo-like helical	GO:0004842 ubiquitin-protein transferase activity; GO:0016567 protein ubiquitination;	gi|659097388|ref|XP_008449598.1| PREDICTED: E3 ubiquitin-protein ligase PUB22-like [Cucumis melo]	AT3G52450.1 | Symbols: PUB22 | plant U-box 22 | chr3:19440943-19442250 REVERSE LENGTH=435	sp|Q9SVC6|PUB22_ARATH E3 ubiquitin-protein ligase PUB22 OS=Arabidopsis thaliana GN=PUB22 PE=1 SV=1	0.0768987
Bhi08G000955	green	chr8	-	-	gi|449439633|ref|XP_004137590.1| PREDICTED: uncharacterized protein LOC101220892 [Cucumis sativus] >gi|700208926|gb|KGN64022.1| hypothetical protein Csa_1G038890 [Cucumis sativus]	AT5G61340.1 | Symbols: | unknown protein; BEST Arabidopsis thaliana protein match is: unknown protein (TAIR:AT1G26650.1); Has 30201 Blast hits to 17322 proteins in 780 species: Archae - 12; Bacteria - 1396; Metazoa - 17338; Fungi - 3422; Plants - 5037; Viruses - 0; Other Eukaryotes - 2996 (source: NCBI BLink). | chr5:24662064-24663044 REVERSE LENGTH=326	-	0.0763674
Bhi11G001596	green	chr11	IPR006917 SOUL haem-binding protein; IPR011256 Regulatory factor, effector binding domain	-	gi|1035398974|ref|XP_016899693.1| PREDICTED: heme-binding-like protein At3g10130, chloroplastic [Cucumis melo]	AT2G37970.1 | Symbols: SOUL-1 | SOUL heme-binding family protein | chr2:15891027-15891704 FORWARD LENGTH=225	sp|Q9SR77|HBPL1_ARATH Heme-binding-like protein At3g10130, chloroplastic OS=Arabidopsis thaliana GN=At3g10130 PE=2 SV=1	0.0755228
Bhi01G000285	green	chr1	IPR000008 C2 domain	GO:0005515 protein binding;	gi|449433101|ref|XP_004134336.1| PREDICTED: BON1-associated protein 2-like [Cucumis sativus] >gi|700201412|gb|KGN56545.1| hypothetical protein Csa_3G123180 [Cucumis sativus]	AT2G45760.1 | Symbols: BAP2, BAL | BON association protein 2 | chr2:18847125-18847748 REVERSE LENGTH=207	sp|Q58FX0|BAP2_ARATH BON1-associated protein 2 OS=Arabidopsis thaliana GN=BAP2 PE=1 SV=1	0.0744305
Bhi04G001424	blue	chr4	IPR004316 SWEET sugar transporter	GO:0016021 integral component of membrane;	gi|449466016|ref|XP_004150723.1| PREDICTED: bidirectional sugar transporter SWEET1 [Cucumis sativus] >gi|700192285|gb|KGN47489.1| hypothetical protein Csa_6G343690 [Cucumis sativus]	AT1G21460.1 | Symbols: SWEET1, AtSWEET1 | Nodulin MtN3 family protein | chr1:7512030-7513281 REVERSE LENGTH=247	sp|Q8L9J7|SWET1_ARATH Bidirectional sugar transporter SWEET1 OS=Arabidopsis thaliana GN=SWEET1 PE=1 SV=1	0.0739938
Bhi01G002138	turquoise	chr1	-	-	gi|449458149|ref|XP_004146810.1| PREDICTED: EPIDERMAL PATTERNING FACTOR-like protein 3 [Cucumis sativus] >gi|778686166|ref|XP_011652341.1| PREDICTED: EPIDERMAL PATTERNING FACTOR-like protein 3 [Cucumis sativus] >gi|778686169|ref|XP_011652342.1| PREDICTED: EPIDERMAL PATTERNING FACTOR-like protein 3 [Cucumis sativus]	AT3G13898.1 | Symbols: | unknown protein; LOCATED IN: endomembrane system; BEST Arabidopsis thaliana protein match is: unknown protein (TAIR:AT5G10310.1). | chr3:4584011-4584334 FORWARD LENGTH=107	sp|C4B8C4|EPFL3_ARATH EPIDERMAL PATTERNING FACTOR-like protein 3 OS=Arabidopsis thaliana GN=EPFL3 PE=1 SV=1	0.073468
Bhi11G002185	brown	chr11	IPR009057 Homeodomain-like; IPR001005 SANT/Myb domain; IPR017884 SANT domain	GO:0003677 DNA binding;	gi|449460267|ref|XP_004147867.1| PREDICTED: protein RADIALIS-like 3 [Cucumis sativus] >gi|700204829|gb|KGN59962.1| hypothetical protein Csa_3G857030 [Cucumis sativus]	AT4G39250.1 | Symbols: ATRL1, RSM2, RL1 | RAD-like 1 | chr4:18271457-18271857 REVERSE LENGTH=100	sp|F4JVB8|RADL1_ARATH Protein RADIALIS-like 1 OS=Arabidopsis thaliana GN=RL1 PE=2 SV=1	0.0731626
Bhi09G002350	turquoise	chr9	-	-	gi|700200413|gb|KGN55571.1| hypothetical protein Csa_4G669230 [Cucumis sativus]	AT4G19430.1 | Symbols: | unknown protein; FUNCTIONS IN: molecular_function unknown; INVOLVED IN: biological_process unknown; LOCATED IN: chloroplast; EXPRESSED IN: 17 plant structures; EXPRESSED DURING: 13 growth stages; Has 30201 Blast hits to 17322 proteins in 780 species: Archae - 12; Bacteria - 1396; Metazoa - 17338; Fungi - 3422; Plants - 5037; Viruses - 0; Other Eukaryotes - 2996 (source: N…	-	0.0729993
BhiUN1106G1	turquoise	Contig1106	IPR012336 Thioredoxin-like fold	-	gi|659132923|ref|XP_008466458.1| PREDICTED: probable nucleoredoxin 2 [Cucumis melo]	AT1G60420.1 | Symbols: | DC1 domain-containing protein | chr1:22261978-22264243 FORWARD LENGTH=578	sp|Q0JIL1|NRX2_ORYSJ Probable nucleoredoxin 2 OS=Oryza sativa subsp. japonica GN=Os01g0794400 PE=2 SV=1	0.0725026
BhiUN245G40	yellow	Contig245	-	-	gi|700189653|gb|KGN44886.1| hypothetical protein Csa_7G394060 [Cucumis sativus]	-	-	0.0723672
Bhi01G000358	green	chr1	IPR032799 Xylanase inhibitor, C-terminal; IPR021109 Aspartic peptidase domain; IPR001969 Aspartic peptidase, active site; IPR001461 Aspartic peptidase; IPR032861 Xylanase inhibitor, N-terminal	-	gi|700201288|gb|KGN56421.1| Aspartic proteinase nepenthesin-1 [Cucumis sativus]	AT1G01300.1 | Symbols: | Eukaryotic aspartyl protease family protein | chr1:117065-118522 FORWARD LENGTH=485	sp|Q9LNJ3|APF2_ARATH Aspartyl protease family protein 2 OS=Arabidopsis thaliana GN=APF2 PE=2 SV=1	0.072243
Bhi05G000653	brown	chr5	IPR002085 Alcohol dehydrogenase superfamily, zinc-type; IPR016040 NAD(P)-binding domain; IPR011032 GroES-like; IPR020843 Polyketide synthase, enoylreductase domain; IPR013149 Alcohol dehydrogenase, C-terminal	GO:0008270 zinc ion binding; GO:0016491 oxidoreductase activity; GO:0055114 oxidation-reduction process;	gi|659110469|ref|XP_008455240.1| PREDICTED: 2-alkenal reductase (NADP(+)-dependent)-like [Cucumis melo]	AT3G03080.1 | Symbols: | Zinc-binding dehydrogenase family protein | chr3:698530-700278 REVERSE LENGTH=350	sp|Q9SLN8|DBR_TOBAC 2-alkenal reductase (NADP(+)-dependent) OS=Nicotiana tabacum GN=DBR PE=1 SV=1	0.0717809
Bhi09G000101	turquoise	chr9	-	-	gi|778729254|ref|XP_011659556.1| PREDICTED: thionin-like protein 2 [Cucumis sativus] >gi|700190110|gb|KGN45343.1| hypothetical protein Csa_7G441625 [Cucumis sativus]	AT1G12663.1 | Symbols: | Predicted to encode a PR (pathogenesis-related) protein. Belongs to the plant thionin (PR-13) family with the following members: At1g66100, At5g36910, At1g72260, At2g15010, At1g12663, At1g12660. | chr1:4310969-4311457 FORWARD LENGTH=115	sp|A8MRP4|THNL2_ARATH Thionin-like protein 2 OS=Arabidopsis thaliana GN=At1g12663 PE=3 SV=1	0.0711807
Bhi03G001076	brown	chr3	IPR030184 WAT1-related protein; IPR000620 EamA domain	GO:0016021 integral component of membrane; GO:0022857 transmembrane transporter activity;	gi|659080822|ref|XP_008440998.1| PREDICTED: WAT1-related protein At5g64700-like [Cucumis melo] >gi|659080824|ref|XP_008440999.1| PREDICTED: WAT1-related protein At5g64700-like [Cucumis melo]	AT5G64700.1 | Symbols: | nodulin MtN21 /EamA-like transporter family protein | chr5:25865190-25866845 REVERSE LENGTH=359	sp|Q9FGG3|WTR45_ARATH WAT1-related protein At5g64700 OS=Arabidopsis thaliana GN=At5g64700 PE=2 SV=1	0.0708444
Bhi01G000120	yellow	chr1	IPR007650 Zf-FLZ domain	-	gi|700201552|gb|KGN56685.1| hypothetical protein Csa_3G128930 [Cucumis sativus]	AT2G44670.1 | Symbols: | Protein of unknown function (DUF581) | chr2:18425279-18425673 FORWARD LENGTH=93	-	0.0707452
Bhi04G001500	yellow	chr4	IPR003441 NAC domain	GO:0003677 DNA binding; GO:0006355 regulation of transcription, DNA-templated;	gi|585231898|gb|AHJ38169.1| NAC domain transcription factor 2 [Citrullus colocynthis]	AT1G01720.1 | Symbols: ATAF1, ANAC002 | NAC (No Apical Meristem) domain transcriptional regulator superfamily protein | chr1:268471-269514 FORWARD LENGTH=289	sp|Q39013|NAC2_ARATH NAC domain-containing protein 2 OS=Arabidopsis thaliana GN=NAC002 PE=2 SV=2	0.0698984
BhiUN159G9	turquoise	Contig159	IPR001128 Cytochrome P450; IPR002401 Cytochrome P450, E-class, group I; IPR017972 Cytochrome P450, conserved site	GO:0005506 iron ion binding; GO:0016705 oxidoreductase activity, acting on paired donors, with incorporation or reduction of molecular oxygen; GO:0020037 heme binding; GO:0055114 oxidation-reduction process;	gi|659121323|ref|XP_008460602.1| PREDICTED: cytochrome P450 CYP736A12 [Cucumis melo]	AT5G07990.1 | Symbols: TT7, CYP75B1, D501 | Cytochrome P450 superfamily protein | chr5:2560437-2562859 FORWARD LENGTH=513	sp|H2DH18|C7A12_PANGI Cytochrome P450 CYP736A12 OS=Panax ginseng PE=2 SV=1	0.0692948
Bhi10G000135	turquoise	chr10	-	-	gi|700192837|gb|KGN48041.1| hypothetical protein Csa_6G425780 [Cucumis sativus]	AT3G11600.1 | Symbols: | unknown protein; FUNCTIONS IN: molecular_function unknown; INVOLVED IN: response to karrikin; EXPRESSED IN: 21 plant structures; EXPRESSED DURING: 12 growth stages; BEST Arabidopsis thaliana protein match is: unknown protein (TAIR:AT5G06270.1); Has 171 Blast hits to 171 proteins in 15 species: Archae - 0; Bacteria - 0; Metazoa - 0; Fungi - 0; Plants - 171; Viruses - 0; Ot…	-	0.0687605
Bhi12G000202	turquoise	chr12	IPR000048 IQ motif, EF-hand binding site; IPR025064 Domain of unknown function DUF4005; IPR027417 P-loop containing nucleoside triphosphate hydrolase	GO:0005515 protein binding;	gi|659073720|ref|XP_008437216.1| PREDICTED: protein IQ-DOMAIN 14 isoform X1 [Cucumis melo]	AT4G23060.1 | Symbols: IQD22 | IQ-domain 22 | chr4:12087283-12090408 FORWARD LENGTH=484	sp|Q8LPG9|IQD14_ARATH Protein IQ-DOMAIN 14 OS=Arabidopsis thaliana GN=IQD14 PE=1 SV=1	0.0677302
Bhi11G000165	yellow	chr11	IPR002068 Alpha crystallin/Hsp20 domain; IPR031107 Small heat shock protein HSP20; IPR008978 HSP20-like chaperone	-	gi|659095978|ref|XP_008448861.1| PREDICTED: small heat shock protein, chloroplastic isoform X2 [Cucumis melo]	AT4G25200.1 | Symbols: ATHSP23.6-MITO, HSP23.6-MITO | mitochondrion-localized small heat shock protein 23.6 | chr4:12917089-12917858 FORWARD LENGTH=210	sp|P11890|HS23C_OXYRB Small heat shock protein, chloroplastic OS=Oxybasis rubra GN=HSP23 PE=2 SV=1	0.0673185
BhiUN207G16	yellow	Contig207	-	-	-	-	-	0.0671177
Bhi05G001247	yellow	chr5	IPR018247 EF-Hand 1, calcium-binding site; IPR011992 EF-hand domain pair; IPR002048 EF-hand domain	-	gi|659110964|ref|XP_008455503.1| PREDICTED: uncharacterized protein LOC103495655 [Cucumis melo]	AT2G44310.1 | Symbols: | Calcium-binding EF-hand family protein | chr2:18309285-18309713 FORWARD LENGTH=142	-	0.0664795
Bhi01G001697	blue	chr1	IPR000315 B-box-type zinc finger; IPR010402 CCT domain	GO:0005622 intracellular; GO:0008270 zinc ion binding;	gi|449438975|ref|XP_004137263.1| PREDICTED: zinc finger protein CONSTANS-LIKE 2-like [Cucumis sativus] >gi|700198611|gb|KGN53769.1| hypothetical protein Csa_4G124910 [Cucumis sativus]	AT3G02380.1 | Symbols: COL2, ATCOL2 | CONSTANS-like 2 | chr3:487438-488624 REVERSE LENGTH=347	sp|Q96502|COL2_ARATH Zinc finger protein CONSTANS-LIKE 2 OS=Arabidopsis thaliana GN=COL2 PE=1 SV=1	0.0662613
Bhi08G000102	yellow	chr8	IPR003100 PAZ domain; IPR014811 Argonaute, linker 1 domain; IPR003165 Piwi domain; IPR012337 Ribonuclease H-like domain; IPR032474 Protein argonaute, N-terminal; IPR032472 Argonaute linker 2 domain; IPR032473 Protein argonaute, Mid domain	GO:0005515 protein binding;	gi|659071857|ref|XP_008462248.1| PREDICTED: protein argonaute 5 [Cucumis melo]	AT2G27880.1 | Symbols: AGO5 | Argonaute family protein | chr2:11871488-11876712 FORWARD LENGTH=997	sp|Q9SJK3|AGO5_ARATH Protein argonaute 5 OS=Arabidopsis thaliana GN=AGO5 PE=1 SV=2	0.0662196
Bhi02G001203	blue	chr2	IPR007493 Protein of unknown function DUF538	-	gi|659098800|ref|XP_008450299.1| PREDICTED: uncharacterized protein LOC103491951 [Cucumis melo]	AT1G55265.1 | Symbols: | Protein of unknown function, DUF538 | chr1:20617326-20617853 FORWARD LENGTH=175	-	0.0655324
Bhi10G000109	blue	chr10	IPR004263 Exostosin-like	-	gi|449456052|ref|XP_004145764.1| PREDICTED: probable glucuronoxylan glucuronosyltransferase IRX7 [Cucumis sativus] >gi|700191670|gb|KGN46874.1| hypothetical protein Csa_6G147670 [Cucumis sativus]	AT2G28110.1 | Symbols: FRA8, IRX7 | Exostosin family protein | chr2:11978024-11979641 REVERSE LENGTH=448	sp|Q9ZUV3|IRX7_ARATH Probable glucuronoxylan glucuronosyltransferase IRX7 OS=Arabidopsis thaliana GN=IRX7 PE=2 SV=1	0.0655115
Bhi11G002152	turquoise	chr11	IPR029044 Nucleotide-diphospho-sugar transferases; IPR002495 Glycosyl transferase, family 8	-	gi|659133229|ref|XP_008466622.1| PREDICTED: probable galacturonosyltransferase-like 1 [Cucumis melo]	AT1G19300.1 | Symbols: GATL1, PARVUS, GLZ1, ATGATL1 | Nucleotide-diphospho-sugar transferases superfamily protein | chr1:6671451-6672506 REVERSE LENGTH=351	sp|Q9LN68|GATL1_ARATH Probable galacturonosyltransferase-like 1 OS=Arabidopsis thaliana GN=GATL1 PE=2 SV=1	0.0653344
Bhi03G000430	blue	chr3	IPR004696 Triose phosphate/phosphoenolpyruvate translocator; IPR004853 Sugar phosphate transporter domain	GO:0005215 transporter activity; GO:0006810 transport; GO:0016021 integral component of membrane;	gi|659078910|ref|XP_008439971.1| PREDICTED: glucose-6-phosphate/phosphate translocator 2, chloroplastic [Cucumis melo]	AT1G61800.1 | Symbols: GPT2, ATGPT2 | glucose-6-phosphate/phosphate translocator 2 | chr1:22824527-22826459 FORWARD LENGTH=388	sp|Q94B38|GPT2_ARATH Glucose-6-phosphate/phosphate translocator 2, chloroplastic OS=Arabidopsis thaliana GN=GPT2 PE=2 SV=2	0.0649234
Bhi04G000260	blue	chr4	IPR005134 Uncharacterised protein family UPF0114	-	gi|659087847|ref|XP_008444667.1| PREDICTED: uncharacterized protein LOC103487936 [Cucumis melo]	AT4G19390.1 | Symbols: | Uncharacterised protein family (UPF0114) | chr4:10574903-10576355 REVERSE LENGTH=273	-	0.0637661
Bhi12G002237	blue	chr12	IPR021940 Uncharacterised domain Wax2, C-terminal; IPR006694 Fatty acid hydroxylase	-	gi|449471069|ref|XP_004153200.1| PREDICTED: protein ECERIFERUM 1-like [Cucumis sativus] >gi|700191077|gb|KGN46281.1| hypothetical protein Csa_6G079750 [Cucumis sativus]	AT1G02205.2 | Symbols: CER1 | Fatty acid hydroxylase superfamily | chr1:418818-422154 FORWARD LENGTH=625	sp|F4HVY0|CER1_ARATH Protein ECERIFERUM 1 OS=Arabidopsis thaliana GN=CER1 PE=1 SV=1	0.0632223
Bhi07G000298	blue	chr7	IPR007493 Protein of unknown function DUF538	-	gi|449449036|ref|XP_004142271.1| PREDICTED: uncharacterized protein LOC101204611 [Cucumis sativus] >gi|700194445|gb|KGN49622.1| hypothetical protein Csa_5G029450 [Cucumis sativus]	AT1G09310.1 | Symbols: | Protein of unknown function, DUF538 | chr1:3009109-3009648 FORWARD LENGTH=179	-	0.0626924
Bhi09G001711	green	chr9	-	-	gi|778688989|ref|XP_011652880.1| PREDICTED: uncharacterized protein LOC105435142 [Cucumis sativus] >gi|700204762|gb|KGN59895.1| hypothetical protein Csa_3G852440 [Cucumis sativus]	AT3G15518.1 | Symbols: | unknown protein; FUNCTIONS IN: molecular_function unknown; INVOLVED IN: biological_process unknown; LOCATED IN: cellular_component unknown; Has 30201 Blast hits to 17322 proteins in 780 species: Archae - 12; Bacteria - 1396; Metazoa - 17338; Fungi - 3422; Plants - 5037; Viruses - 0; Other Eukaryotes - 2996 (source: NCBI BLink). | chr3:5249221-5249541 FORWARD LENGTH=106	-	0.061842
Bhi04G000741	blue	chr4	IPR011598 Myc-type, basic helix-loop-helix (bHLH) domain	GO:0046983 protein dimerization activity;	gi|659088405|ref|XP_008444964.1| PREDICTED: transcription factor bHLH93-like [Cucumis melo]	AT5G65640.1 | Symbols: bHLH093 | beta HLH protein 93 | chr5:26237137-26238904 FORWARD LENGTH=351	sp|Q9LSL1|BH093_ARATH Transcription factor bHLH93 OS=Arabidopsis thaliana GN=BHLH93 PE=1 SV=1	0.0616158
Bhi04G000215	green	chr4	IPR015202 Domain of unknown function DUF1929; IPR015916 Galactose oxidase, beta-propeller; IPR009880 Glyoxal oxidase, N-terminal; IPR011043 Galactose oxidase/kelch, beta-propeller; IPR013783 Immunoglobulin-like fold; IPR014756 Immunoglobulin E-set	-	gi|778671517|ref|XP_004152661.2| PREDICTED: galactose oxidase-like [Cucumis sativus] >gi|700207542|gb|KGN62661.1| hypothetical protein Csa_2G365680 [Cucumis sativus]	AT1G19900.1 | Symbols: | glyoxal oxidase-related protein | chr1:6907038-6908684 REVERSE LENGTH=548	sp|Q9FYG4|GLOX1_ARATH Aldehyde oxidase GLOX1 OS=Arabidopsis thaliana GN=GLOX1 PE=2 SV=1	0.0606994
Bhi03G000836	turquoise	chr3	IPR023123 Tubulin, C-terminal; IPR008280 Tubulin/FtsZ, C-terminal; IPR002452 Alpha tubulin; IPR000217 Tubulin; IPR003008 Tubulin/FtsZ, GTPase domain; IPR018316 Tubulin/FtsZ, 2-layer sandwich domain; IPR017975 Tubulin, conserved site	-	gi|659079816|ref|XP_008440459.1| PREDICTED: tubulin alpha chain-like [Cucumis melo]	AT1G50010.1 | Symbols: TUA2 | tubulin alpha-2 chain | chr1:18517737-18519729 FORWARD LENGTH=450	sp|P33629|TBA_PRUDU Tubulin alpha chain OS=Prunus dulcis GN=TUBA PE=2 SV=1	0.0602438
Bhi09G002652	brown	chr9	-	-	gi|659103619|ref|XP_008452653.1| PREDICTED: uncharacterized protein LOC103493609 [Cucumis melo]	AT4G33800.1 | Symbols: | unknown protein; Has 30201 Blast hits to 17322 proteins in 780 species: Archae - 12; Bacteria - 1396; Metazoa - 17338; Fungi - 3422; Plants - 5037; Viruses - 0; Other Eukaryotes - 2996 (source: NCBI BLink). | chr4:16210404-16211307 REVERSE LENGTH=170	-	0.0597506
Bhi09G002140	red	chr9	IPR011598 Myc-type, basic helix-loop-helix (bHLH) domain	GO:0046983 protein dimerization activity;	gi|659132275|ref|XP_008466114.1| PREDICTED: transcription factor bHLH61-like [Cucumis melo]	AT5G65640.1 | Symbols: bHLH093 | beta HLH protein 93 | chr5:26237137-26238904 FORWARD LENGTH=351	sp|Q9LSL1|BH093_ARATH Transcription factor bHLH93 OS=Arabidopsis thaliana GN=BHLH93 PE=1 SV=1	0.0594094
Bhi01G002226	red	chr1	IPR003676 Small auxin-up RNA	GO:0009733 response to auxin;	gi|778682476|ref|XP_011651720.1| PREDICTED: uncharacterized protein LOC101214812 [Cucumis sativus] >gi|700203331|gb|KGN58464.1| hypothetical protein Csa_3G646510 [Cucumis sativus]	AT1G72430.1 | Symbols: | SAUR-like auxin-responsive protein family | chr1:27265150-27265509 REVERSE LENGTH=119	-	0.0593374
Bhi06G001725	blue	chr6	IPR006458 Ovate protein family, C-terminal	-	gi|659071610|ref|XP_008460883.1| PREDICTED: transcription repressor OFP8-like [Cucumis melo]	AT5G19650.1 | Symbols: ATOFP8, OFP8 | ovate family protein 8 | chr5:6639632-6640297 REVERSE LENGTH=221	sp|Q3E9B4|OFP8_ARATH Transcription repressor OFP8 OS=Arabidopsis thaliana GN=OFP8 PE=2 SV=1	0.0584279
Bhi06G001700	brown	chr6	IPR001471 AP2/ERF domain; IPR016177 DNA-binding domain	GO:0003700 transcription factor activity, sequence-specific DNA binding; GO:0006355 regulation of transcription, DNA-templated;	gi|449443341|ref|XP_004139438.1| PREDICTED: ethylene-responsive transcription factor ERF039 [Cucumis sativus]	AT5G11590.1 | Symbols: TINY2 | Integrase-type DNA-binding superfamily protein | chr5:3727789-3728499 REVERSE LENGTH=236	sp|Q9LYD3|DREB3_ARATH Dehydration-responsive element-binding protein 3 OS=Arabidopsis thaliana GN=DREB3 PE=2 SV=1	0.0579887
Bhi12G002200	turquoise	chr12	-	-	gi|700191123|gb|KGN46327.1| hypothetical protein Csa_6G085100 [Cucumis sativus]	-	-	0.0577169
BhiUN505G1	brown	Contig505	IPR022251 Protein of unknown function wound-induced	-	gi|700201071|gb|KGN56204.1| hypothetical protein Csa_3G099650 [Cucumis sativus]	AT4G10265.1 | Symbols: | Wound-responsive family protein | chr4:6373226-6373477 REVERSE LENGTH=83	-	0.0574491
Bhi01G000550	turquoise	chr1	IPR023329 Chlorophyll a/b binding protein domain; IPR022796 Chlorophyll A-B binding protein	-	gi|659076329|ref|XP_008438620.1| PREDICTED: early light-induced protein 1, chloroplastic [Cucumis melo]	AT3G22840.1 | Symbols: ELIP1, ELIP | Chlorophyll A-B binding family protein | chr3:8084628-8085445 REVERSE LENGTH=195	sp|P11432|ELI_PEA Early light-induced protein, chloroplastic OS=Pisum sativum PE=2 SV=1	0.0573143
Bhi08G001016	blue	chr8	-	-	gi|778664755|ref|XP_011660345.1| PREDICTED: uncharacterized protein LOC105436376 [Cucumis sativus] >gi|700209019|gb|KGN64115.1| hypothetical protein Csa_1G042270 [Cucumis sativus]	AT1G13360.1 | Symbols: | unknown protein; BEST Arabidopsis thaliana protein match is: unknown protein (TAIR:AT3G25870.1); Has 69 Blast hits to 69 proteins in 16 species: Archae - 0; Bacteria - 0; Metazoa - 6; Fungi - 0; Plants - 63; Viruses - 0; Other Eukaryotes - 0 (source: NCBI BLink). | chr1:4577229-4577813 REVERSE LENGTH=194	-	0.0572546
Bhi04G000757	black	chr4	IPR018108 Mitochondrial substrate/solute carrier; IPR023395 Mitochondrial carrier domain; IPR002067 Mitochondrial carrier protein	-	gi|778671879|ref|XP_011649701.1| PREDICTED: mitochondrial uncoupling protein 5-like [Cucumis sativus] >gi|700207644|gb|KGN62763.1| hypothetical protein Csa_2G371610 [Cucumis sativus]	AT4G24570.1 | Symbols: DIC2 | dicarboxylate carrier 2 | chr4:12686546-12687487 FORWARD LENGTH=313	sp|Q9SB52|PUMP4_ARATH Mitochondrial uncoupling protein 4 OS=Arabidopsis thaliana GN=PUMP4 PE=2 SV=1	0.0571362
Bhi08G001072	red	chr8	IPR017949 Thaumatin, conserved site; IPR001938 Thaumatin	-	gi|659066840|ref|XP_008463807.1| PREDICTED: thaumatin-like protein [Cucumis melo]	AT1G18250.1 | Symbols: ATLP-1 | Pathogenesis-related thaumatin superfamily protein | chr1:6277024-6278005 REVERSE LENGTH=243	sp|P50699|TLPH_ARATH Thaumatin-like protein OS=Arabidopsis thaliana GN=At1g18250 PE=2 SV=2	0.0564744
Bhi03G000369	turquoise	chr3	IPR001810 F-box domain	GO:0005515 protein binding;	gi|659078787|ref|XP_008439907.1| PREDICTED: F-box protein At4g05010-like [Cucumis melo]	AT4G21510.1 | Symbols: | F-box family protein | chr4:11446193-11447025 REVERSE LENGTH=225	sp|O65416|SKI27_ARATH F-box protein SKIP27 OS=Arabidopsis thaliana GN=SKIP27 PE=1 SV=2	0.0560124
Bhi11G002356	brown	chr11	IPR002109 Glutaredoxin; IPR012336 Thioredoxin-like fold	GO:0009055 electron carrier activity; GO:0015035 protein disulfide oxidoreductase activity; GO:0045454 cell redox homeostasis;	gi|449437741|ref|XP_004136649.1| PREDICTED: uncharacterized protein At5g39865-like [Cucumis sativus] >gi|700204334|gb|KGN59467.1| hypothetical protein Csa_3G822190 [Cucumis sativus]	AT3G57070.1 | Symbols: | Glutaredoxin family protein | chr3:21124174-21125427 FORWARD LENGTH=417	sp|Q9FLE8|Y5986_ARATH Uncharacterized protein At5g39865 OS=Arabidopsis thaliana GN=At5g39865 PE=2 SV=1	0.0555246
Bhi03G000857	brown	chr3	IPR000270 PB1 domain; IPR003311 AUX/IAA protein	GO:0005515 protein binding;	gi|659079886|ref|XP_008440498.1| PREDICTED: auxin-responsive protein IAA9-like [Cucumis melo] >gi|659079888|ref|XP_008440499.1| PREDICTED: auxin-responsive protein IAA9-like [Cucumis melo]	AT5G65670.2 | Symbols: IAA9 | indole-3-acetic acid inducible 9 | chr5:26254463-26256134 FORWARD LENGTH=336	sp|Q38827|IAA9_ARATH Auxin-responsive protein IAA9 OS=Arabidopsis thaliana GN=IAA9 PE=1 SV=1	0.0552988
Bhi12G000785	green	chr12	-	-	gi|659072858|ref|XP_008467131.1| PREDICTED: LOW QUALITY PROTEIN: uncharacterized protein LOC103504559 [Cucumis melo]	AT1G23110.4 | Symbols: | unknown protein; FUNCTIONS IN: molecular_function unknown; LOCATED IN: chloroplast; BEST Arabidopsis thaliana protein match is: unknown protein (TAIR:AT1G70900.1). | chr1:8196608-8197665 REVERSE LENGTH=248	-	0.0544419
Bhi11G000137	turquoise	chr11	IPR011598 Myc-type, basic helix-loop-helix (bHLH) domain; IPR025610 Transcription factor MYC/MYB N-terminal	GO:0046983 protein dimerization activity; GO:0016891 endoribonuclease activity, producing 5'-phosphomonoesters; GO:0042779 tRNA 3'-trailer cleavage;	gi|449462019|ref|XP_004148739.1| PREDICTED: transcription factor MYC2-like [Cucumis sativus] >gi|700200626|gb|KGN55759.1| Transcription factor AtMYC2 [Cucumis sativus]	AT1G32640.1 | Symbols: ATMYC2, RD22BP1, JAI1, JIN1, MYC2, ZBF1 | Basic helix-loop-helix (bHLH) DNA-binding family protein | chr1:11799042-11800913 REVERSE LENGTH=623	sp|Q39204|MYC2_ARATH Transcription factor MYC2 OS=Arabidopsis thaliana GN=MYC2 PE=1 SV=2	0.0539352
Bhi02G000428	turquoise	chr2	IPR023213 Chloramphenicol acetyltransferase-like domain; IPR003480 Transferase	-	gi|449440979|ref|XP_004138261.1| PREDICTED: vinorine synthase-like [Cucumis sativus]	AT1G24430.1 | Symbols: | HXXXD-type acyl-transferase family protein | chr1:8658190-8659497 REVERSE LENGTH=435	sp|Q70PR7|VINSY_RAUSE Vinorine synthase OS=Rauvolfia serpentina GN=ACT PE=1 SV=2	0.0536435
Bhi03G002287	black	chr3	-	-	-	-	-	0.0529013
Bhi12G000836	turquoise	chr12	IPR008217 Ccc1 family	-	gi|449450149|ref|XP_004142826.1| PREDICTED: vacuolar iron transporter 1.1 [Cucumis sativus] >gi|700196285|gb|KGN51462.1| hypothetical protein Csa_5G550250 [Cucumis sativus]	AT2G01770.1 | Symbols: VIT1, ATVIT1 | vacuolar iron transporter 1 | chr2:334775-336425 REVERSE LENGTH=250	sp|Q9ZUA5|VIT1_ARATH Vacuolar iron transporter 1 OS=Arabidopsis thaliana GN=VIT1 PE=2 SV=1	0.0528524
Bhi01G000627	turquoise	chr1	IPR032861 Xylanase inhibitor, N-terminal; IPR021109 Aspartic peptidase domain; IPR001461 Aspartic peptidase; IPR032799 Xylanase inhibitor, C-terminal	-	gi|449432733|ref|XP_004134153.1| PREDICTED: basic 7S globulin-like [Cucumis sativus] >gi|700201885|gb|KGN57018.1| hypothetical protein Csa_3G149980 [Cucumis sativus]	AT1G03220.1 | Symbols: | Eukaryotic aspartyl protease family protein | chr1:787143-788444 FORWARD LENGTH=433	sp|P13917|7SB1_SOYBN Basic 7S globulin OS=Glycine max GN=BG PE=1 SV=2	0.0525198
Bhi01G000097	brown	chr1	IPR017871 ABC transporter, conserved site; IPR011527 ABC transporter type 1, transmembrane domain; IPR027417 P-loop containing nucleoside triphosphate hydrolase; IPR003439 ABC transporter-like; IPR003593 AAA+ ATPase domain	GO:0005524 ATP binding; GO:0016887 ATPase activity;	gi|659075618|ref|XP_008438240.1| PREDICTED: putative ABC transporter C family member 15 [Cucumis melo]	AT3G60160.1 | Symbols: ATMRP9, MRP9, ABCC9 | multidrug resistance-associated protein 9 | chr3:22223829-22229195 REVERSE LENGTH=1506	sp|Q9M1C7|AB9C_ARATH ABC transporter C family member 9 OS=Arabidopsis thaliana GN=ABCC9 PE=2 SV=2	0.0523942
Bhi06G000320	red	chr6	IPR018247 EF-Hand 1, calcium-binding site; IPR002048 EF-hand domain; IPR011992 EF-hand domain pair	-	gi|1035417564|ref|XP_008459700.2| PREDICTED: probable calcium-binding protein CML30 [Cucumis melo]	AT3G29000.1 | Symbols: | Calcium-binding EF-hand family protein | chr3:11005791-11006375 FORWARD LENGTH=194	sp|Q9MBG5|CML30_ARATH Probable calcium-binding protein CML30 OS=Arabidopsis thaliana GN=CML30 PE=2 SV=1	0.0518872
Bhi01G000976	blue	chr1	-	-	gi|449446043|ref|XP_004140781.1| PREDICTED: uncharacterized protein LOC101217506 [Cucumis sativus] >gi|700202227|gb|KGN57360.1| hypothetical protein Csa_3G181960 [Cucumis sativus]	-	-	0.0518126
Bhi09G002458	turquoise	chr9	IPR007087 Zinc finger, C2H2	GO:0046872 metal ion binding;	gi|778697855|ref|XP_011654418.1| PREDICTED: zinc finger protein 1-like [Cucumis sativus] >gi|700200289|gb|KGN55447.1| hypothetical protein Csa_4G652110 [Cucumis sativus]	AT1G80730.1 | Symbols: ZFP1, ATZFP1 | zinc-finger protein 1 | chr1:30339493-30340179 REVERSE LENGTH=228	sp|Q42485|ZFP1_ARATH Zinc finger protein 1 OS=Arabidopsis thaliana GN=ZFP1 PE=2 SV=1	0.0514471
Bhi04G000795	brown	chr4	IPR004827 Basic-leucine zipper domain	GO:0003700 transcription factor activity, sequence-specific DNA binding; GO:0006355 regulation of transcription, DNA-templated; GO:0043565 sequence-specific DNA binding;	gi|663070919|ref|NP_001284656.1| uncharacterized protein LOC103488299 [Cucumis melo] >gi|449441922|ref|XP_004138731.1| PREDICTED: transcription factor HY5 [Cucumis sativus] >gi|323099915|gb|ADX23549.1| bZIP2 [Cucumis melo] >gi|700207820|gb|KGN62939.1| hypothetical protein Csa_2G381650 [Cucumis sativus]	AT5G11260.1 | Symbols: HY5, TED 5 | Basic-leucine zipper (bZIP) transcription factor family protein | chr5:3593583-3594800 REVERSE LENGTH=168	sp|Q9SM50|HY5_SOLLC Transcription factor HY5 OS=Solanum lycopersicum GN=HY5 PE=2 SV=1	0.0513576
Bhi09G001275	turquoise	chr9	IPR013525 ABC-2 type transporter; IPR003439 ABC transporter-like; IPR003593 AAA+ ATPase domain; IPR027417 P-loop containing nucleoside triphosphate hydrolase	GO:0016020 membrane;	gi|659123953|ref|XP_008461920.1| PREDICTED: ABC transporter G family member 25 isoform X1 [Cucumis melo]	AT1G71960.1 | Symbols: ABCG25, ATABCG25 | ATP-binding casette family G25 | chr1:27082587-27088163 REVERSE LENGTH=662	sp|Q84TH5|AB25G_ARATH ABC transporter G family member 25 OS=Arabidopsis thaliana GN=ABCG25 PE=2 SV=1	0.0508988
BhiUN557G10	yellow	Contig557	IPR006694 Fatty acid hydroxylase	GO:0005506 iron ion binding; GO:0006633 fatty acid biosynthetic process; GO:0016491 oxidoreductase activity; GO:0055114 oxidation-reduction process;	gi|449445997|ref|XP_004140758.1| PREDICTED: beta-carotene hydroxylase 2, chloroplastic-like [Cucumis sativus] >gi|700202277|gb|KGN57410.1| hypothetical protein Csa_3G183920 [Cucumis sativus]	AT4G25700.1 | Symbols: BETA-OHASE 1, B1, chy1, BCH1 | beta-hydroxylase 1 | chr4:13094142-13095866 REVERSE LENGTH=310	sp|Q9SZZ8|BCH1_ARATH Beta-carotene 3-hydroxylase 1, chloroplastic OS=Arabidopsis thaliana GN=BETA-OHASE 1 PE=1 SV=1	0.050586
Bhi01G001952	blue	chr1	IPR007822 Lanthionine synthetase C-like; IPR020464 LanC-like protein, eukaryotic	-	gi|659107693|ref|XP_008453808.1| PREDICTED: lanC-like protein GCL1 [Cucumis melo]	AT5G65280.1 | Symbols: GCL1 | GCR2-like 1 | chr5:26086129-26088069 REVERSE LENGTH=433	sp|Q9FJN7|GCL1_ARATH LanC-like protein GCL1 OS=Arabidopsis thaliana GN=GCL1 PE=2 SV=1	0.0500844
Bhi12G001366	green	chr12	-	-	-	-	-	0.0497531
Bhi08G001747	green	chr8	IPR020045 5'-3' exonuclease, C-terminal domain; IPR019974 XPG conserved site; IPR029060 PIN domain-like; IPR008918 Helix-hairpin-helix motif, class 2; IPR006085 XPG N-terminal; IPR006086 XPG-I domain; IPR006084 XPG/Rad2 endonuclease; IPR032641 Exonuclease 1	GO:0003677 DNA binding; GO:0003824 catalytic activity; GO:0035312 5'-3' exodeoxyribonuclease activity;	gi|778661092|ref|XP_011657503.1| PREDICTED: exonuclease 1 [Cucumis sativus] >gi|700210486|gb|KGN65582.1| hypothetical protein Csa_1G464550 [Cucumis sativus]	AT1G29630.2 | Symbols: | 5'-3' exonuclease family protein | chr1:10349587-10353538 FORWARD LENGTH=735	sp|Q8L6Z7|EXO1_ARATH Exonuclease 1 OS=Arabidopsis thaliana GN=EXO1 PE=2 SV=2	0.0497434
Bhi03G000289	brown	chr3	-	-	-	-	-	0.0497142
Bhi11G001097	black	chr11	IPR013830 SGNH hydrolase-type esterase domain; IPR001087 GDSL lipase/esterase	-	gi|659093270|ref|XP_008447456.1| PREDICTED: GDSL esterase/lipase At1g09390-like [Cucumis melo]	AT1G09390.1 | Symbols: | GDSL-like Lipase/Acylhydrolase superfamily protein | chr1:3031264-3033415 FORWARD LENGTH=370	sp|O80522|GDL2_ARATH GDSL esterase/lipase At1g09390 OS=Arabidopsis thaliana GN=At1g09390 PE=2 SV=1	0.0494681
Bhi11G000132	green	chr11	IPR018108 Mitochondrial substrate/solute carrier; IPR023395 Mitochondrial carrier domain	-	gi|659095639|ref|XP_008448688.1| PREDICTED: mitochondrial carnitine/acylcarnitine carrier-like protein [Cucumis melo] >gi|659095641|ref|XP_008448689.1| PREDICTED: mitochondrial carnitine/acylcarnitine carrier-like protein [Cucumis melo] >gi|659095643|ref|XP_008448690.1| PREDICTED: mitochondrial carnitine/acylcarnitine carrier-like protein [Cucumis melo] >gi|659095645|ref|XP_008448691.1| PREDICTED…	AT5G46800.1 | Symbols: BOU | Mitochondrial substrate carrier family protein | chr5:18988779-18989810 REVERSE LENGTH=300	sp|Q93XM7|MCAT_ARATH Mitochondrial carnitine/acylcarnitine carrier-like protein OS=Arabidopsis thaliana GN=BOU PE=2 SV=1	0.0491055
Bhi04G000374	brown	chr4	-	-	-	-	-	0.0489826
Bhi09G001699	brown	chr9	IPR004179 Sec63 domain; IPR014756 Immunoglobulin E-set	-	gi|449459768|ref|XP_004147618.1| PREDICTED: U5 small nuclear ribonucleoprotein 200 kDa helicase [Cucumis sativus] >gi|700202051|gb|KGN57184.1| hypothetical protein Csa_3G168950 [Cucumis sativus]	AT1G20960.2 | Symbols: emb1507 | U5 small nuclear ribonucleoprotein helicase, putative | chr1:7302591-7309914 REVERSE LENGTH=2171	sp|Q9SYP1|DEXHC_ARATH DExH-box ATP-dependent RNA helicase DExH12 OS=Arabidopsis thaliana GN=BRR2A PE=1 SV=1	0.048309
Bhi08G000514	green	chr8	IPR007118 Expansin/Lol pI; IPR002963 Expansin; IPR009009 RlpA-like double-psi beta-barrel domain; IPR007117 Expansin, cellulose-binding-like domain; IPR007112 Expansin/pollen allergen, DPBB domain	GO:0005576 extracellular region;	gi|659115279|ref|XP_008457477.1| PREDICTED: expansin-A4-like [Cucumis melo]	AT2G39700.1 | Symbols: ATEXPA4, ATEXP4, ATHEXP ALPHA 1.6, EXPA4 | expansin A4 | chr2:16544246-16545434 REVERSE LENGTH=257	sp|O48818|EXPA4_ARATH Expansin-A4 OS=Arabidopsis thaliana GN=EXPA4 PE=1 SV=1	0.0476434
Bhi10G001797	turquoise	chr10	-	-	gi|700206916|gb|KGN62035.1| hypothetical protein Csa_2G287170 [Cucumis sativus]	-	-	0.0476195
Bhi01G000409	green	chr1	IPR003106 Leucine zipper, homeobox-associated; IPR009057 Homeodomain-like; IPR017970 Homeobox, conserved site; IPR001356 Homeobox domain; IPR006712 HD-ZIP protein, N-terminal	GO:0003700 transcription factor activity, sequence-specific DNA binding; GO:0006355 regulation of transcription, DNA-templated; GO:0043565 sequence-specific DNA binding;	gi|659074831|ref|XP_008437820.1| PREDICTED: homeobox-leucine zipper protein HAT3-like [Cucumis melo]	AT3G60390.1 | Symbols: HAT3 | homeobox-leucine zipper protein 3 | chr3:22320788-22322370 REVERSE LENGTH=315	sp|P46602|HAT3_ARATH Homeobox-leucine zipper protein HAT3 OS=Arabidopsis thaliana GN=HAT3 PE=2 SV=2	0.0474669
Bhi11G001929	brown	chr11	-	-	gi|1098785939|ref|XP_018852674.1| PREDICTED: uncharacterized protein LOC109014626 [Juglans regia]	-	-	0.0474487
Bhi09G002965	yellow	chr9	IPR005814 Aminotransferase class-III; IPR015421 Pyridoxal phosphate-dependent transferase, major region, subdomain 1; IPR015422 Pyridoxal phosphate-dependent transferase, major region, subdomain 2; IPR015424 Pyridoxal phosphate-dependent transferase	GO:0008483 transaminase activity; GO:0030170 pyridoxal phosphate binding;	gi|778695469|ref|XP_011654001.1| PREDICTED: gamma aminobutyrate transaminase 2 [Cucumis sativus] >gi|700199820|gb|KGN54978.1| hypothetical protein Csa_4G618430 [Cucumis sativus]	AT3G22200.1 | Symbols: POP2, GABA-T, HER1 | Pyridoxal phosphate (PLP)-dependent transferases superfamily protein | chr3:7835286-7838863 FORWARD LENGTH=504	sp|Q84P52|GATP3_SOLLC Gamma aminobutyrate transaminase 3, chloroplastic OS=Solanum lycopersicum GN=GABA-TP3 PE=1 SV=1	0.0472392
Bhi02G000582	brown	chr2	IPR008480 Protein of unknown function DUF761, plant	-	gi|659107312|ref|XP_008453609.1| PREDICTED: uncharacterized protein LOC103494271 [Cucumis melo]	AT5G57510.1 | Symbols: | unknown protein; Has 27 Blast hits to 27 proteins in 9 species: Archae - 0; Bacteria - 0; Metazoa - 0; Fungi - 0; Plants - 27; Viruses - 0; Other Eukaryotes - 0 (source: NCBI BLink). | chr5:23289164-23289556 REVERSE LENGTH=130	-	0.0467815
Bhi12G002198	brown	chr12	IPR008998 Agglutinin domain; IPR005830 Aerolysin; IPR023307 Aerolysin-like toxin, beta complex domain	-	gi|659120115|ref|XP_008460021.1| PREDICTED: uncharacterized protein LOC103498960 [Cucumis melo]	-	sp|Q66S17|NATT3_THANI Natterin-3 OS=Thalassophryne nattereri PE=1 SV=1	0.0461889
Bhi08G001659	brown	chr8	-	-	gi|700210776|gb|KGN65872.1| hypothetical protein Csa_1G534780 [Cucumis sativus]	AT1G30260.1 | Symbols: | BEST Arabidopsis thaliana protein match is: Galactosyltransferase family protein (TAIR:AT4G21060.1); Has 30 Blast hits to 30 proteins in 8 species: Archae - 0; Bacteria - 0; Metazoa - 0; Fungi - 0; Plants - 30; Viruses - 0; Other Eukaryotes - 0 (source: NCBI BLink). | chr1:10651159-10651452 FORWARD LENGTH=97	-	0.0461302
Bhi11G001982	blue	chr11	IPR003613 U box domain; IPR011989 Armadillo-like helical; IPR016024 Armadillo-type fold; IPR013083 Zinc finger, RING/FYVE/PHD-type	GO:0004842 ubiquitin-protein transferase activity; GO:0016567 protein ubiquitination;	gi|659084501|ref|XP_008442921.1| PREDICTED: E3 ubiquitin-protein ligase PUB23-like [Cucumis melo]	AT2G35930.1 | Symbols: PUB23 | plant U-box 23 | chr2:15083101-15084336 REVERSE LENGTH=411	sp|Q84TG3|PUB23_ARATH E3 ubiquitin-protein ligase PUB23 OS=Arabidopsis thaliana GN=PUB23 PE=1 SV=1	0.0461265
Bhi07G000057	yellow	chr7	IPR016040 NAD(P)-binding domain; IPR002347 Glucose/ribitol dehydrogenase; IPR002198 Short-chain dehydrogenase/reductase SDR; IPR020904 Short-chain dehydrogenase/reductase, conserved site	-	gi|700194517|gb|KGN49694.1| hypothetical protein Csa_5G072680 [Cucumis sativus]	AT1G10310.1 | Symbols: | NAD(P)-binding Rossmann-fold superfamily protein | chr1:3381733-3383874 REVERSE LENGTH=242	sp|Q9SY73|PTALR_ARATH NADPH-dependent pterin aldehyde reductase OS=Arabidopsis thaliana GN=At1g10310 PE=1 SV=1	0.0457078
Bhi03G000922	turquoise	chr3	IPR001024 PLAT/LH2 domain	GO:0005515 protein binding;	gi|659080095|ref|XP_008440608.1| PREDICTED: lipoxygenase homology domain-containing protein 1 [Cucumis melo]	AT2G22170.1 | Symbols: | Lipase/lipooxygenase, PLAT/LH2 family protein | chr2:9427010-9427742 REVERSE LENGTH=183	sp|Q9SIE7|PLAT2_ARATH PLAT domain-containing protein 2 OS=Arabidopsis thaliana GN=PLAT2 PE=2 SV=1	0.0450481
BhiUN306G3	green	Contig306	-	-	-	-	-	0.0445855
Bhi03G002182	turquoise	chr3	IPR008998 Agglutinin domain; IPR023307 Aerolysin-like toxin, beta complex domain	-	gi|449445680|ref|XP_004140600.1| PREDICTED: uncharacterized protein LOC101212789 [Cucumis sativus] >gi|700191117|gb|KGN46321.1| hypothetical protein Csa_6G083560 [Cucumis sativus]	-	sp|Q66S17|NATT3_THANI Natterin-3 OS=Thalassophryne nattereri PE=1 SV=1	0.044408
Bhi04G000801	brown	chr4	IPR004158 Protein of unknown function DUF247, plant	-	gi|659088838|ref|XP_008445188.1| PREDICTED: UPF0481 protein At3g47200-like [Cucumis melo]	AT4G31980.1 | Symbols: | unknown protein; CONTAINS InterPro DOMAIN/s: Protein of unknown function DUF247, plant (InterPro:IPR004158), Protein of unknown function DUF862, eukaryotic (InterPro:IPR008580); BEST Arabidopsis thaliana protein match is: Plant protein of unknown function (DUF247) (TAIR:AT5G11290.1); Has 1967 Blast hits to 1844 proteins in 183 species: Archae - 0; Bacteria - 6; Metazoa - …	sp|Q9SD53|Y3720_ARATH UPF0481 protein At3g47200 OS=Arabidopsis thaliana GN=At3g47200 PE=2 SV=1	0.0440971
Bhi10G001880	blue	chr10	IPR003657 WRKY domain	GO:0003700 transcription factor activity, sequence-specific DNA binding; GO:0006355 regulation of transcription, DNA-templated; GO:0043565 sequence-specific DNA binding;	gi|659116106|ref|XP_008457906.1| PREDICTED: probable WRKY transcription factor 51 [Cucumis melo]	AT5G64810.1 | Symbols: WRKY51, ATWRKY51 | WRKY DNA-binding protein 51 | chr5:25908415-25909687 FORWARD LENGTH=194	sp|Q93WU9|WRK51_ARATH Probable WRKY transcription factor 51 OS=Arabidopsis thaliana GN=WRKY51 PE=1 SV=1	0.0438569
Bhi09G001938	black	chr9	IPR001305 Heat shock protein DnaJ, cysteine-rich domain	GO:0031072 heat shock protein binding; GO:0051082 unfolded protein binding;	gi|659132841|ref|XP_008466412.1| PREDICTED: chaperone protein DnaJ-like [Cucumis melo]	AT3G47650.1 | Symbols: | DnaJ/Hsp40 cysteine-rich domain superfamily protein | chr3:17569576-17570262 FORWARD LENGTH=136	-	0.0433774
Bhi01G000336	turquoise	chr1	IPR003657 WRKY domain	GO:0003700 transcription factor activity, sequence-specific DNA binding; GO:0006355 regulation of transcription, DNA-templated; GO:0043565 sequence-specific DNA binding;	gi|659075009|ref|XP_008437915.1| PREDICTED: probable WRKY transcription factor 46 [Cucumis melo]	AT4G11070.1 | Symbols: WRKY41, AtWRKY41 | WRKY family transcription factor | chr4:6759303-6760763 FORWARD LENGTH=313	sp|Q8H0Y8|WRK41_ARATH Probable WRKY transcription factor 41 OS=Arabidopsis thaliana GN=WRKY41 PE=2 SV=2	0.0428402
BhiUN50G49	turquoise	Contig50_2	IPR006766 Phosphate-induced protein 1	-	gi|449438771|ref|XP_004137161.1| PREDICTED: protein EXORDIUM-like 2 [Cucumis sativus] >gi|700198560|gb|KGN53718.1| hypothetical protein Csa_4G110050 [Cucumis sativus]	AT5G64260.1 | Symbols: EXL2 | EXORDIUM like 2 | chr5:25703980-25704897 FORWARD LENGTH=305	sp|Q9FE06|EXOL2_ARATH Protein EXORDIUM-like 2 OS=Arabidopsis thaliana GN=EXL2 PE=2 SV=1	0.0428029
Bhi02G001755	black	chr2	IPR006121 Heavy metal-associated domain, HMA	GO:0030001 metal ion transport; GO:0046872 metal ion binding;	gi|659099509|ref|XP_008450635.1| PREDICTED: uncharacterized protein LOC103492164 [Cucumis melo]	AT1G23000.1 | Symbols: | Heavy metal transport/detoxification superfamily protein | chr1:8143614-8144865 FORWARD LENGTH=358	sp|Q9C9A3|HIP20_ARATH Heavy metal-associated isoprenylated plant protein 20 OS=Arabidopsis thaliana GN=HIPP20 PE=2 SV=1	0.0420059
Bhi02G000559	turquoise	chr2	IPR008271 Serine/threonine-protein kinase, active site; IPR017441 Protein kinase, ATP binding site; IPR000719 Protein kinase domain; IPR001245 Serine-threonine/tyrosine-protein kinase catalytic domain; IPR002290 Serine/threonine/dual specificity protein kinase, catalytic domain; IPR011009 Protein kinase-like domain; IPR013320 Concanavalin A-like lectin/glucanase domain	GO:0004672 protein kinase activity; GO:0006468 protein phosphorylation;	gi|449457175|ref|XP_004146324.1| PREDICTED: probable receptor-like serine/threonine-protein kinase At5g57670 [Cucumis sativus] >gi|700210370|gb|KGN65466.1| hypothetical protein Csa_1G423240 [Cucumis sativus]	AT2G18890.1 | Symbols: | Protein kinase superfamily protein | chr2:8184027-8186685 FORWARD LENGTH=392	sp|Q5XF57|Y5576_ARATH Probable receptor-like serine/threonine-protein kinase At5g57670 OS=Arabidopsis thaliana GN=At5g57670 PE=2 SV=1	0.0417871
Bhi11G001100	green	chr11	IPR003020 Bicarbonate transporter, eukaryotic; IPR011531 Bicarbonate transporter, C-terminal	GO:0005452 inorganic anion exchanger activity; GO:0006820 anion transport; GO:0016020 membrane;	gi|659093266|ref|XP_008447454.1| PREDICTED: boron transporter 1 [Cucumis melo]	AT3G62270.1 | Symbols: | HCO3- transporter family | chr3:23042528-23045633 REVERSE LENGTH=703	sp|Q9M1P7|BOR2_ARATH Probable boron transporter 2 OS=Arabidopsis thaliana GN=BOR2 PE=2 SV=1	0.0404809
Bhi11G000316	turquoise	chr11	IPR001810 F-box domain; IPR025886 Phloem protein 2-like	GO:0005515 protein binding;	gi|659096222|ref|XP_008448978.1| PREDICTED: F-box protein PP2-A11 [Cucumis melo]	AT1G12710.1 | Symbols: AtPP2-A12, PP2-A12 | phloem protein 2-A12 | chr1:4326980-4328324 REVERSE LENGTH=291	sp|Q9LN77|P2A12_ARATH F-box protein PP2-A12 OS=Arabidopsis thaliana GN=P2A12 PE=2 SV=1	0.0401582
Bhi08G001498	yellow	chr8	IPR004508 Thioredoxin-independent 5'-adenylylsulphate reductase; IPR013766 Thioredoxin domain; IPR012336 Thioredoxin-like fold; IPR014729 Rossmann-like alpha/beta/alpha sandwich fold; IPR002500 Phosphoadenosine phosphosulphate reductase	GO:0016671 oxidoreductase activity, acting on a sulfur group of donors, disulfide as acceptor; GO:0019419 sulfate reduction; GO:0055114 oxidation-reduction process;	gi|659067724|ref|XP_008440977.1| PREDICTED: 5'-adenylylsulfate reductase 1, chloroplastic [Cucumis melo] >gi|307136221|gb|ADN34058.1| adenylyl-sulfate reductase [Cucumis melo subsp. melo]	AT4G21990.1 | Symbols: APR3, PRH-26, PRH26, ATAPR3 | APS reductase 3 | chr4:11657284-11658973 REVERSE LENGTH=458	sp|P92980|APR3_ARATH 5'-adenylylsulfate reductase 3, chloroplastic OS=Arabidopsis thaliana GN=APR3 PE=2 SV=2	0.0400869
Bhi09G002611	black	chr9	IPR001356 Homeobox domain; IPR003106 Leucine zipper, homeobox-associated; IPR017970 Homeobox, conserved site; IPR009057 Homeodomain-like	GO:0003677 DNA binding;	gi|449447319|ref|XP_004141416.1| PREDICTED: homeobox-leucine zipper protein HAT9-like [Cucumis sativus] >gi|700200149|gb|KGN55307.1| hypothetical protein Csa_4G645820 [Cucumis sativus]	AT4G37790.1 | Symbols: HAT22 | Homeobox-leucine zipper protein family | chr4:17768241-17769272 FORWARD LENGTH=278	sp|P46604|HAT22_ARATH Homeobox-leucine zipper protein HAT22 OS=Arabidopsis thaliana GN=HAT22 PE=1 SV=1	0.0398668
Bhi03G000446	red	chr3	-	-	gi|700193904|gb|KGN49108.1| hypothetical protein Csa_6G513720 [Cucumis sativus]	AT1G11740.1 | Symbols: | ankyrin repeat family protein | chr1:3963317-3966824 REVERSE LENGTH=644	-	0.039743
Bhi05G001209	turquoise	chr5	IPR005018 DOMON domain; IPR017214 Cytochrome b561 and DOMON domain-containing protein; IPR004877 Cytochrome b561 domain; IPR006593 Cytochrome b561/ferric reductase transmembrane	-	gi|659110902|ref|XP_008455470.1| PREDICTED: cytochrome b561 and DOMON domain-containing protein At5g47530-like [Cucumis melo]	AT5G47530.1 | Symbols: | Auxin-responsive family protein | chr5:19281471-19282870 FORWARD LENGTH=395	sp|Q9FGK4|B561J_ARATH Cytochrome b561 and DOMON domain-containing protein At5g47530 OS=Arabidopsis thaliana GN=At5g47530 PE=2 SV=1	0.039534
Bhi10G001895	green	chr10	IPR001128 Cytochrome P450; IPR017972 Cytochrome P450, conserved site; IPR002401 Cytochrome P450, E-class, group I	GO:0005506 iron ion binding; GO:0016705 oxidoreductase activity, acting on paired donors, with incorporation or reduction of molecular oxygen; GO:0020037 heme binding; GO:0055114 oxidation-reduction process;	gi|1035415755|ref|XP_008457922.2| PREDICTED: cytochrome P450 78A7 [Cucumis melo]	AT5G09970.1 | Symbols: CYP78A7 | cytochrome P450, family 78, subfamily A, polypeptide 7 | chr5:3112241-3113987 FORWARD LENGTH=536	sp|Q9FIB0|C78A7_ARATH Cytochrome P450 78A7 OS=Arabidopsis thaliana GN=CYP78A7 PE=2 SV=1	0.039477
Bhi11G000935	green	chr11	-	-	gi|700197598|gb|KGN52756.1| hypothetical protein Csa_4G000770 [Cucumis sativus]	-	-	0.0389361
Bhi01G000527	brown	chr1	IPR000719 Protein kinase domain; IPR011009 Protein kinase-like domain; IPR002290 Serine/threonine/dual specificity protein kinase, catalytic domain; IPR008271 Serine/threonine-protein kinase, active site; IPR017441 Protein kinase, ATP binding site	GO:0004672 protein kinase activity; GO:0005524 ATP binding; GO:0006468 protein phosphorylation;	gi|659076149|ref|XP_008438527.1| PREDICTED: phosphoenolpyruvate carboxylase kinase 1-like [Cucumis melo]	AT1G08650.1 | Symbols: PPCK1, ATPPCK1 | phosphoenolpyruvate carboxylase kinase 1 | chr1:2752206-2753232 FORWARD LENGTH=284	sp|Q9SPK4|PPCK1_ARATH Phosphoenolpyruvate carboxylase kinase 1 OS=Arabidopsis thaliana GN=PPCK1 PE=1 SV=1	0.0384039
Bhi10G000278	red	chr10	-	-	gi|156340410|ref|XP_001620443.1| hypothetical protein NEMVEDRAFT_v1g148126 [Nematostella vectensis] >gi|156205376|gb|EDO28343.1| predicted protein, partial [Nematostella vectensis]	-	-	0.0378668
Bhi04G000312	blue	chr4	IPR002048 EF-hand domain; IPR011992 EF-hand domain pair; IPR018247 EF-Hand 1, calcium-binding site	GO:0005509 calcium ion binding;	gi|700207397|gb|KGN62516.1| hypothetical protein Csa_2G358870 [Cucumis sativus]	-	-	0.0376938
Bhi02G000399	green	chr2	IPR018247 EF-Hand 1, calcium-binding site; IPR002048 EF-hand domain; IPR011992 EF-hand domain pair	-	gi|659128944|ref|XP_008464450.1| PREDICTED: putative calcium-binding protein CML19 [Cucumis melo]	AT1G76650.3 | Symbols: CML38 | calmodulin-like 38 | chr1:28766909-28767442 REVERSE LENGTH=177	sp|Q8RYJ8|CML19_ORYSJ Putative calcium-binding protein CML19 OS=Oryza sativa subsp. japonica GN=CML19 PE=3 SV=1	0.0375147
Bhi06G001547	turquoise	chr6	IPR006936 ALOG domain	-	gi|659070745|ref|XP_008456451.1| PREDICTED: protein LIGHT-DEPENDENT SHORT HYPOCOTYLS 2-like [Cucumis melo]	AT1G07090.1 | Symbols: LSH6 | Protein of unknown function (DUF640) | chr1:2174202-2174792 REVERSE LENGTH=196	sp|Q9LMK2|LSH6_ARATH Protein LIGHT-DEPENDENT SHORT HYPOCOTYLS 6 OS=Arabidopsis thaliana GN=LSH6 PE=1 SV=1	0.0374773
Bhi08G000638	green	chr8	IPR012881 Protein of unknown function DUF1685	-	gi|778665020|ref|XP_011648467.1| PREDICTED: cyclin-dependent kinase 11B-like [Cucumis sativus] >gi|700209944|gb|KGN65040.1| hypothetical protein Csa_1G181530 [Cucumis sativus]	AT2G42760.1 | Symbols: | unknown protein; CONTAINS InterPro DOMAIN/s: Protein of unknown function DUF1685 (InterPro:IPR012881); Has 170 Blast hits to 164 proteins in 34 species: Archae - 0; Bacteria - 1; Metazoa - 26; Fungi - 10; Plants - 107; Viruses - 0; Other Eukaryotes - 26 (source: NCBI BLink). | chr2:17796382-17797185 REVERSE LENGTH=267	-	0.037385
Bhi11G000517	yellow	chr11	IPR000626 Ubiquitin domain; IPR019954 Ubiquitin conserved site; IPR019956 Ubiquitin; IPR029071 Ubiquitin-related domain	GO:0005515 protein binding;	gi|7267292|emb|CAB81074.1| polyubiquitin (ubq10) [Arabidopsis thaliana]	AT4G05320.4 | Symbols: UBQ10 | polyubiquitin 10 | chr4:2718559-2719932 FORWARD LENGTH=457	sp|Q8H159|UBQ10_ARATH Polyubiquitin 10 OS=Arabidopsis thaliana GN=UBQ10 PE=1 SV=2	0.0367253
Bhi04G000246	green	chr4	IPR003441 NAC domain	GO:0003677 DNA binding; GO:0006355 regulation of transcription, DNA-templated;	gi|659087883|ref|XP_008444686.1| PREDICTED: NAC domain-containing protein 13-like [Cucumis melo] >gi|1035401456|ref|XP_016900048.1| PREDICTED: NAC domain-containing protein 13-like [Cucumis melo]	AT1G65910.1 | Symbols: anac028, NAC028 | NAC domain containing protein 28 | chr1:24520933-24524108 REVERSE LENGTH=631	sp|Q949N0|NAC53_ARATH NAC domain-containing protein 53 OS=Arabidopsis thaliana GN=NAC053 PE=2 SV=1	0.0366895
Bhi04G000220	black	chr4	IPR003676 Small auxin-up RNA	GO:0009733 response to auxin;	gi|449469903|ref|XP_004152658.1| PREDICTED: auxin-induced protein 15A-like [Cucumis sativus] >gi|700207547|gb|KGN62666.1| hypothetical protein Csa_2G366710 [Cucumis sativus]	AT1G75580.1 | Symbols: | SAUR-like auxin-responsive protein family | chr1:28377530-28377856 FORWARD LENGTH=108	sp|P33081|AX15A_SOYBN Auxin-induced protein 15A OS=Glycine max PE=2 SV=1	0.0365817
Bhi09G001697	green	chr9	IPR014001 Helicase superfamily 1/2, ATP-binding domain; IPR011545 DEAD/DEAH box helicase domain; IPR027417 P-loop containing nucleoside triphosphate hydrolase	-	gi|449459768|ref|XP_004147618.1| PREDICTED: U5 small nuclear ribonucleoprotein 200 kDa helicase [Cucumis sativus] >gi|700202051|gb|KGN57184.1| hypothetical protein Csa_3G168950 [Cucumis sativus]	AT1G20960.2 | Symbols: emb1507 | U5 small nuclear ribonucleoprotein helicase, putative | chr1:7302591-7309914 REVERSE LENGTH=2171	sp|Q9SYP1|DEXHC_ARATH DExH-box ATP-dependent RNA helicase DExH12 OS=Arabidopsis thaliana GN=BRR2A PE=1 SV=1	0.0364648
Bhi06G000626	turquoise	chr6	IPR001841 Zinc finger, RING-type; IPR013083 Zinc finger, RING/FYVE/PHD-type	GO:0005515 protein binding; GO:0008270 zinc ion binding;	gi|659118063|ref|XP_008458935.1| PREDICTED: RING-H2 finger protein ATL52-like [Cucumis melo]	AT1G04360.1 | Symbols: | RING/U-box superfamily protein | chr1:1167507-1168652 REVERSE LENGTH=381	sp|P93823|ATL1_ARATH RING-H2 finger protein ATL1 OS=Arabidopsis thaliana GN=ATL1 PE=2 SV=1	0.0363218
Bhi07G001490	green	chr7	IPR008700 RIN4, pathogenic type III effector avirulence factor Avr cleavage site	-	gi|449435021|ref|XP_004135294.1| PREDICTED: RPM1-interacting protein 4 [Cucumis sativus] >gi|700196535|gb|KGN51712.1| hypothetical protein Csa_5G591770 [Cucumis sativus]	AT5G63270.1 | Symbols: | RPM1-interacting protein 4 (RIN4) family protein | chr5:25365498-25365949 REVERSE LENGTH=80	-	0.0362011
BhiUN66G19	red	Contig66	IPR003851 Zinc finger, Dof-type	GO:0003677 DNA binding; GO:0006355 regulation of transcription, DNA-templated;	gi|659069014|ref|XP_008447721.1| PREDICTED: dof zinc finger protein DOF5.1-like [Cucumis melo]	AT3G55370.2 | Symbols: OBP3 | OBF-binding protein 3 | chr3:20527198-20528876 FORWARD LENGTH=354	sp|Q9M2U1|DOF36_ARATH Dof zinc finger protein DOF3.6 OS=Arabidopsis thaliana GN=DOF3.6 PE=1 SV=2	0.0361747
Bhi01G001213	green	chr1	IPR006045 Cupin 1; IPR014710 RmlC-like jelly roll fold; IPR011051 RmlC-like cupin domain	GO:0045735 nutrient reservoir activity;	gi|700202448|gb|KGN57581.1| hypothetical protein Csa_3G218170 [Cucumis sativus]	AT1G07750.1 | Symbols: | RmlC-like cupins superfamily protein | chr1:2404300-2405863 REVERSE LENGTH=356	sp|P07730|GLUA2_ORYSJ Glutelin type-A 2 OS=Oryza sativa subsp. japonica GN=GLUA2 PE=1 SV=1	0.0361526
Bhi12G000359	red	chr12	IPR002401 Cytochrome P450, E-class, group I; IPR001128 Cytochrome P450	GO:0005506 iron ion binding; GO:0016705 oxidoreductase activity, acting on paired donors, with incorporation or reduction of molecular oxygen; GO:0020037 heme binding; GO:0055114 oxidation-reduction process;	gi|449459692|ref|XP_004147580.1| PREDICTED: flavonoid 3'-monooxygenase-like [Cucumis sativus] >gi|700195029|gb|KGN50206.1| hypothetical protein Csa_5G159600 [Cucumis sativus]	AT4G12330.1 | Symbols: CYP706A7 | cytochrome P450, family 706, subfamily A, polypeptide 7 | chr4:7317776-7319658 REVERSE LENGTH=518	sp|P48418|C75A1_PETHY Flavonoid 3',5'-hydroxylase 1 OS=Petunia hybrida GN=CYP75A1 PE=2 SV=1	0.0359952
Bhi09G000032	yellow	chr9	IPR029068 Glyoxalase/Bleomycin resistance protein/Dihydroxybiphenyl dioxygenase; IPR025870 Glyoxalase-like domain	-	gi|1035419556|ref|XP_016902650.1| PREDICTED: uncharacterized protein LOC103499788 [Cucumis melo]	AT1G80160.1 | Symbols: | Lactoylglutathione lyase / glyoxalase I family protein | chr1:30151101-30151930 FORWARD LENGTH=167	-	0.03561
BhiUN481G2	black	Contig481	IPR003441 NAC domain	GO:0003677 DNA binding; GO:0006355 regulation of transcription, DNA-templated;	gi|659131970|ref|XP_008465949.1| PREDICTED: NAC domain-containing protein 45-like isoform X1 [Cucumis melo]	AT4G17980.1 | Symbols: anac071, NAC071 | NAC domain containing protein 71 | chr4:9978850-9980038 REVERSE LENGTH=262	sp|A4VCM0|NAC45_ARATH NAC domain-containing protein 45 OS=Arabidopsis thaliana GN=NAC045 PE=2 SV=1	0.0351431
Bhi12G001474	yellow	chr12	IPR027944 Sieve element occlusion, C-terminal; IPR027942 Sieve element occlusion, N-terminal	-	gi|449465382|ref|XP_004150407.1| PREDICTED: uncharacterized protein LOC101217067 [Cucumis sativus] >gi|700206512|gb|KGN61631.1| hypothetical protein Csa_2G193350 [Cucumis sativus]	AT3G01680.1 | Symbols: | CONTAINS InterPro DOMAIN/s: Mediator complex subunit Med28 (InterPro:IPR021640); BEST Arabidopsis thaliana protein match is: unknown protein (TAIR:AT3G01670.1); Has 122 Blast hits to 112 proteins in 13 species: Archae - 0; Bacteria - 0; Metazoa - 0; Fungi - 0; Plants - 122; Viruses - 0; Other Eukaryotes - 0 (source: NCBI BLink). | chr3:252033-255246 FORWARD LENGTH=740	sp|Q9SS87|SEOB_ARATH Protein SIEVE ELEMENT OCCLUSION B OS=Arabidopsis thaliana GN=SEOB PE=1 SV=1	0.0349622
Bhi10G001696	turquoise	chr10	IPR012442 Protein of unknown function DUF1645, plant	-	gi|449472539|ref|XP_004153625.1| PREDICTED: uncharacterized protein LOC101210068 [Cucumis sativus] >gi|700206611|gb|KGN61730.1| hypothetical protein Csa_2G234570 [Cucumis sativus]	AT2G15760.1 | Symbols: | Protein of unknown function (DUF1645) | chr2:6865807-6866754 REVERSE LENGTH=315	-	0.0347796
Bhi01G000545	blue	chr1	IPR003100 PAZ domain; IPR032472 Argonaute linker 2 domain; IPR012337 Ribonuclease H-like domain; IPR003165 Piwi domain; IPR032474 Protein argonaute, N-terminal; IPR032473 Protein argonaute, Mid domain; IPR014811 Argonaute, linker 1 domain	GO:0005515 protein binding;	gi|659076305|ref|XP_008438608.1| PREDICTED: protein argonaute 10 [Cucumis melo] >gi|659076307|ref|XP_008438609.1| PREDICTED: protein argonaute 10 [Cucumis melo]	AT5G43810.2 | Symbols: ZLL | Stabilizer of iron transporter SufD / Polynucleotidyl transferase | chr5:17611939-17616562 FORWARD LENGTH=988	sp|Q9XGW1|AGO10_ARATH Protein argonaute 10 OS=Arabidopsis thaliana GN=AGO10 PE=2 SV=1	0.0346042
Bhi08G001578	blue	chr8	IPR002227 Tyrosinase copper-binding domain; IPR016213 Polyphenol oxidase; IPR022740 Polyphenol oxidase, C-terminal; IPR008922 Uncharacterised domain, di-copper centre; IPR022739 Polyphenol oxidase, central domain	GO:0008152 metabolic process; GO:0016491 oxidoreductase activity; GO:0004097 catechol oxidase activity; GO:0046148 pigment biosynthetic process;	gi|222093457|gb|ACM43505.1| polyphenoloxidase [Camellia nitidissima]	-	sp|Q06215|PPO_VICFA Polyphenol oxidase A1, chloroplastic OS=Vicia faba PE=1 SV=1	0.0344673
Bhi10G001865	turquoise	chr10	IPR007749 Protein of unknown function DUF677	-	gi|659116090|ref|XP_008457897.1| PREDICTED: UPF0496 protein At2g18630-like isoform X2 [Cucumis melo]	AT2G18630.1 | Symbols: | Protein of unknown function (DUF677) | chr2:8081154-8082496 FORWARD LENGTH=393	sp|Q56XQ0|U496I_ARATH UPF0496 protein At2g18630 OS=Arabidopsis thaliana GN=At2g18630 PE=2 SV=3	0.0344432
Bhi11G002140	brown	chr11	IPR001128 Cytochrome P450; IPR002401 Cytochrome P450, E-class, group I	GO:0005506 iron ion binding; GO:0016705 oxidoreductase activity, acting on paired donors, with incorporation or reduction of molecular oxygen; GO:0020037 heme binding; GO:0055114 oxidation-reduction process;	gi|449460141|ref|XP_004147804.1| PREDICTED: cytochrome P450 CYP82D47-like [Cucumis sativus] >gi|700204780|gb|KGN59913.1| hypothetical protein Csa_3G852620 [Cucumis sativus]	AT4G31970.1 | Symbols: CYP82C2 | cytochrome P450, family 82, subfamily C, polypeptide 2 | chr4:15462408-15464358 FORWARD LENGTH=523	sp|O49859|C82A4_SOYBN Cytochrome P450 82A4 OS=Glycine max GN=CYP82A4 PE=2 SV=1	0.0335396
Bhi10G000681	green	chr10	IPR008271 Serine/threonine-protein kinase, active site; IPR020636 Calcium/calmodulin-dependent/calcium-dependent protein kinase; IPR000719 Protein kinase domain; IPR002290 Serine/threonine/dual specificity protein kinase, catalytic domain; IPR011009 Protein kinase-like domain; IPR018451 NAF/FISL domain; IPR004041 NAF domain; IPR017441 Protein kinase, ATP binding site	GO:0004672 protein kinase activity; GO:0006468 protein phosphorylation;	gi|659131225|ref|XP_008465573.1| PREDICTED: CBL-interacting serine/threonine-protein kinase 11 [Cucumis melo]	AT2G30360.1 | Symbols: CIPK11, PKS5, SIP4, SNRK3.22 | SOS3-interacting protein 4 | chr2:12937265-12938572 REVERSE LENGTH=435	sp|O22932|CIPKB_ARATH CBL-interacting serine/threonine-protein kinase 11 OS=Arabidopsis thaliana GN=CIPK11 PE=1 SV=1	0.0333959
Bhi02G001833	yellow	chr2	IPR012946 X8 domain	-	gi|449435582|ref|XP_004135574.1| PREDICTED: mucin-5AC [Cucumis sativus] >gi|700210890|gb|KGN65986.1| Hydrolase, hydrolyzing O-glycosyl compounds [Cucumis sativus]	AT1G09460.1 | Symbols: | Carbohydrate-binding X8 domain superfamily protein | chr1:3053901-3055090 FORWARD LENGTH=330	sp|O65399|E131_ARATH Glucan endo-1,3-beta-glucosidase 1 OS=Arabidopsis thaliana GN=At1g11820 PE=1 SV=3	0.0331514
Bhi09G002166	yellow	chr9	IPR001611 Leucine-rich repeat; IPR000719 Protein kinase domain; IPR032675 Leucine-rich repeat domain, L domain-like; IPR011009 Protein kinase-like domain; IPR003591 Leucine-rich repeat, typical subtype; IPR013210 Leucine-rich repeat-containing N-terminal, plant-type	GO:0005515 protein binding;	gi|659132198|ref|XP_008466072.1| PREDICTED: probably inactive leucine-rich repeat receptor-like protein kinase At2g25790 [Cucumis melo]	AT2G25790.1 | Symbols: | Leucine-rich receptor-like protein kinase family protein | chr2:11000631-11004031 FORWARD LENGTH=960	sp|O82318|Y2579_ARATH Probably inactive leucine-rich repeat receptor-like protein kinase At2g25790 OS=Arabidopsis thaliana GN=At2g25790 PE=2 SV=1	0.0331037
BhiUN132G12	brown	Contig132	IPR018967 Iron sulphur-containing domain, CDGSH-type; IPR006622 Iron sulphur-containing domain, CDGSH-type, subfamily	GO:0043231 intracellular membrane-bounded organelle; GO:0051537 2 iron, 2 sulfur cluster binding;	gi|659073118|ref|XP_008467263.1| PREDICTED: CDGSH iron-sulfur domain-containing protein NEET [Cucumis melo]	AT5G51720.1 | Symbols: | 2 iron, 2 sulfur cluster binding | chr5:21009645-21010227 FORWARD LENGTH=108	sp|Q9FLI7|NEET_ARATH CDGSH iron-sulfur domain-containing protein NEET OS=Arabidopsis thaliana GN=NEET PE=1 SV=1	0.0330755
Bhi04G000306	blue	chr4	IPR002048 EF-hand domain; IPR018247 EF-Hand 1, calcium-binding site; IPR011992 EF-hand domain pair	GO:0005509 calcium ion binding;	gi|700207406|gb|KGN62525.1| hypothetical protein Csa_2G359940 [Cucumis sativus]	AT3G25600.1 | Symbols: | Calcium-binding EF-hand family protein | chr3:9307367-9307852 FORWARD LENGTH=161	sp|Q5ZD81|CML12_ORYSJ Probable calcium-binding protein CML12 OS=Oryza sativa subsp. japonica GN=CML12 PE=2 SV=1	0.0329186
Bhi06G000528	yellow	chr6	IPR006502 Protein of unknown function PDDEXK-like	-	gi|778703422|ref|XP_004142760.2| PREDICTED: uncharacterized protein LOC101214727 [Cucumis sativus] >gi|700196138|gb|KGN51315.1| hypothetical protein Csa_5G517130 [Cucumis sativus]	AT2G39650.1 | Symbols: | Protein of unknown function (DUF506) | chr2:16528094-16529274 REVERSE LENGTH=291	-	0.0315879
Bhi09G001881	brown	chr9	IPR030184 WAT1-related protein; IPR000620 EamA domain	GO:0016021 integral component of membrane; GO:0022857 transmembrane transporter activity;	gi|659133023|ref|XP_008466514.1| PREDICTED: protein WALLS ARE THIN 1-like [Cucumis melo]	AT1G75500.2 | Symbols: WAT1 | Walls Are Thin 1 | chr1:28338282-28340091 REVERSE LENGTH=389	sp|Q94AP3|WAT1_ARATH Protein WALLS ARE THIN 1 OS=Arabidopsis thaliana GN=WAT1 PE=1 SV=1	0.031062
Bhi06G000790	turquoise	chr6	-	-	-	-	-	0.0308682
Bhi10G001122	yellow	chr10	IPR009071 High mobility group box domain	-	gi|659111708|ref|XP_008455870.1| PREDICTED: high mobility group B protein 1-like isoform X2 [Cucumis melo]	AT3G51880.2 | Symbols: HMGB1, NFD1 | high mobility group B1 | chr3:19247241-19248491 REVERSE LENGTH=185	sp|O49595|HMGB1_ARATH High mobility group B protein 1 OS=Arabidopsis thaliana GN=HMGB1 PE=1 SV=1	0.0307065
Bhi03G000279	blue	chr3	IPR011905 Glutaredoxin-like, plant II; IPR002109 Glutaredoxin; IPR012336 Thioredoxin-like fold	-	gi|566006109|ref|NP_001274395.1| glutaredoxin [Cucumis sativus] >gi|548578781|gb|AGX01493.1| glutaredoxin [Cucumis sativus] >gi|700194060|gb|KGN49264.1| Glutaredoxin, grx [Cucumis sativus]	AT1G28480.1 | Symbols: GRX480, roxy19 | Thioredoxin superfamily protein | chr1:10013634-10014047 REVERSE LENGTH=137	sp|Q9SGP6|GRXC9_ARATH Glutaredoxin-C9 OS=Arabidopsis thaliana GN=GRXC9 PE=1 SV=1	0.0304939
Bhi10G000802	green	chr10	IPR027443 Isopenicillin N synthase-like; IPR005123 Oxoglutarate/iron-dependent dioxygenase; IPR026992 Non-haem dioxygenase N-terminal domain	-	gi|659113024|ref|XP_008456405.1| PREDICTED: 1-aminocyclopropane-1-carboxylate oxidase [Cucumis melo]	AT1G05010.1 | Symbols: EFE, ACO4, EAT1 | ethylene-forming enzyme | chr1:1431419-1432695 REVERSE LENGTH=323	sp|Q9MB94|ACCO_PRUMU 1-aminocyclopropane-1-carboxylate oxidase OS=Prunus mume GN=ACO1 PE=2 SV=1	0.0302915
Bhi06G001615	green	chr6	IPR002048 EF-hand domain; IPR011992 EF-hand domain pair; IPR018247 EF-Hand 1, calcium-binding site	GO:0005509 calcium ion binding;	gi|449443049|ref|XP_004139293.1| PREDICTED: calmodulin-like protein 3 [Cucumis sativus] >gi|700205587|gb|KGN60706.1| hypothetical protein Csa_2G007990 [Cucumis sativus]	AT3G59440.1 | Symbols: | Calcium-binding EF-hand family protein | chr3:21970423-21971010 FORWARD LENGTH=195	sp|Q9LX27|CML4_ARATH Calmodulin-like protein 4 OS=Arabidopsis thaliana GN=CML4 PE=2 SV=1	0.0301961
Bhi08G001630	blue	chr8	IPR000197 Zinc finger, TAZ-type; IPR000210 BTB/POZ domain; IPR011333 SKP1/BTB/POZ domain	GO:0003712 transcription cofactor activity; GO:0004402 histone acetyltransferase activity; GO:0005634 nucleus; GO:0006355 regulation of transcription, DNA-templated; GO:0008270 zinc ion binding;	gi|659066340|ref|XP_008439713.1| PREDICTED: BTB/POZ and TAZ domain-containing protein 1-like [Cucumis melo]	AT5G63160.1 | Symbols: BT1 | BTB and TAZ domain protein 1 | chr5:25333485-25335399 REVERSE LENGTH=365	sp|Q9FMK7|BT1_ARATH BTB/POZ and TAZ domain-containing protein 1 OS=Arabidopsis thaliana GN=BT1 PE=1 SV=1	0.0297879
Bhi08G000606	brown	chr8	-	-	-	-	-	0.029736
BhiUN400G2	turquoise	Contig400	IPR025753 AAA-type ATPase, N-terminal domain; IPR003593 AAA+ ATPase domain; IPR027417 P-loop containing nucleoside triphosphate hydrolase; IPR003959 ATPase, AAA-type, core; IPR003960 ATPase, AAA-type, conserved site	-	gi|700193659|gb|KGN48863.1| hypothetical protein Csa_6G504440 [Cucumis sativus]	AT3G50930.1 | Symbols: BCS1 | cytochrome BC1 synthesis | chr3:18929817-18931547 FORWARD LENGTH=576	sp|Q8VZG2|HSR4_ARATH Protein HYPER-SENSITIVITY-RELATED 4 OS=Arabidopsis thaliana GN=HSR4 PE=2 SV=1	0.0297329
Bhi06G000236	turquoise	chr6	IPR009038 GOLD domain; IPR011074 CRAL/TRIO, N-terminal domain; IPR001251 CRAL-TRIO lipid binding domain	GO:0006810 transport; GO:0016021 integral component of membrane;	gi|778708119|ref|XP_004141567.2| PREDICTED: patellin-3-like [Cucumis sativus] >gi|700197544|gb|KGN52721.1| hypothetical protein Csa_5G652260 [Cucumis sativus]	AT1G72160.1 | Symbols: | Sec14p-like phosphatidylinositol transfer family protein | chr1:27153823-27155609 REVERSE LENGTH=490	sp|Q56Z59|PATL3_ARATH Patellin-3 OS=Arabidopsis thaliana GN=PATL3 PE=1 SV=2	0.0294343
Bhi12G000289	turquoise	chr12	IPR006121 Heavy metal-associated domain, HMA	GO:0030001 metal ion transport; GO:0046872 metal ion binding;	gi|449452278|ref|XP_004143886.1| PREDICTED: uncharacterized protein LOC101213529 [Cucumis sativus] >gi|700194883|gb|KGN50060.1| hypothetical protein Csa_5G152250 [Cucumis sativus]	AT1G01490.2 | Symbols: | Heavy metal transport/detoxification superfamily protein | chr1:180401-182066 REVERSE LENGTH=177	-	0.0290987
Bhi01G002287	blue	chr1	IPR003657 WRKY domain	GO:0003700 transcription factor activity, sequence-specific DNA binding; GO:0006355 regulation of transcription, DNA-templated; GO:0043565 sequence-specific DNA binding;	gi|659102064|ref|XP_008451934.1| PREDICTED: probable WRKY transcription factor 41 [Cucumis melo]	AT4G11070.1 | Symbols: WRKY41, AtWRKY41 | WRKY family transcription factor | chr4:6759303-6760763 FORWARD LENGTH=313	sp|Q8H0Y8|WRK41_ARATH Probable WRKY transcription factor 41 OS=Arabidopsis thaliana GN=WRKY41 PE=2 SV=2	0.0288436
Bhi10G001316	turquoise	chr10	IPR023393 START-like domain; IPR000916 Bet v I/Major latex protein	-	gi|449460710|ref|XP_004148088.1| PREDICTED: S-norcoclaurine synthase-like [Cucumis sativus] >gi|700208284|gb|KGN63403.1| hypothetical protein Csa_2G437130 [Cucumis sativus]	-	sp|Q4QTJ2|NCS1_PAPSO S-norcoclaurine synthase 1 OS=Papaver somniferum GN=NCS1 PE=1 SV=1	0.0287892
Bhi02G000449	yellow	chr2	IPR001128 Cytochrome P450; IPR017972 Cytochrome P450, conserved site; IPR002401 Cytochrome P450, E-class, group I	GO:0005506 iron ion binding; GO:0016705 oxidoreductase activity, acting on paired donors, with incorporation or reduction of molecular oxygen; GO:0020037 heme binding; GO:0055114 oxidation-reduction process;	gi|449440634|ref|XP_004138089.1| PREDICTED: cytochrome P450 71A22-like [Cucumis sativus]	AT3G48280.1 | Symbols: CYP71A25 | cytochrome P450, family 71, subfamily A, polypeptide 25 | chr3:17879594-17881164 FORWARD LENGTH=490	sp|Q9STK8|C71AP_ARATH Cytochrome P450 71A25 OS=Arabidopsis thaliana GN=CYP71A25 PE=2 SV=1	0.0286849
Bhi08G001148	green	chr8	IPR002528 Multi antimicrobial extrusion protein	GO:0006855 drug transmembrane transport; GO:0015238 drug transmembrane transporter activity; GO:0015297 antiporter activity; GO:0016020 membrane; GO:0055085 transmembrane transport;	gi|659067038|ref|XP_008437344.1| PREDICTED: protein DETOXIFICATION 35 [Cucumis melo]	AT4G25640.1 | Symbols: ATDTX35, FFT, DTX35 | detoxifying efflux carrier 35 | chr4:13076953-13078965 REVERSE LENGTH=488	sp|F4JTB3|DTX35_ARATH Protein DETOXIFICATION 35 OS=Arabidopsis thaliana GN=DTX35 PE=2 SV=1	0.028671
Bhi11G001324	red	chr11	IPR006276 Cobalamin-independent methionine synthase; IPR002629 Cobalamin-independent methionine synthase MetE, C-terminal/archaeal; IPR013215 Cobalamin-independent methionine synthase MetE, N-terminal	GO:0003871 5-methyltetrahydropteroyltriglutamate-homocysteine S-methyltransferase activity; GO:0008270 zinc ion binding; GO:0009086 methionine biosynthetic process;	gi|1035424072|ref|XP_016903288.1| PREDICTED: 5-methyltetrahydropteroyltriglutamate--homocysteine methyltransferase-like [Cucumis melo]	AT5G17920.2 | Symbols: ATCIMS | Cobalamin-independent synthase family protein | chr5:5935771-5939195 FORWARD LENGTH=765	sp|P93263|METE_MESCR 5-methyltetrahydropteroyltriglutamate--homocysteine methyltransferase OS=Mesembryanthemum crystallinum GN=METE PE=2 SV=1	0.0284551
Bhi09G000051	brown	chr9	-	-	gi|659122304|ref|XP_008461069.1| PREDICTED: uncharacterized protein LOC103499770 [Cucumis melo]	AT3G15630.1 | Symbols: | unknown protein; FUNCTIONS IN: molecular_function unknown; INVOLVED IN: biological_process unknown; LOCATED IN: chloroplast; EXPRESSED IN: 24 plant structures; EXPRESSED DURING: 15 growth stages; BEST Arabidopsis thaliana protein match is: unknown protein (TAIR:AT1G52720.1); Has 61 Blast hits to 61 proteins in 13 species: Archae - 0; Bacteria - 0; Metazoa - 0; Fungi - 0; …	-	0.0280995
Bhi08G000964	blue	chr8	IPR012336 Thioredoxin-like fold; IPR013766 Thioredoxin domain; IPR005746 Thioredoxin	-	gi|659066421|ref|XP_008443897.1| PREDICTED: thioredoxin-like 1-2, chloroplastic [Cucumis melo]	AT1G08570.1 | Symbols: ACHT4 | atypical CYS HIS rich thioredoxin 4 | chr1:2713059-2714312 FORWARD LENGTH=275	sp|O64654|TRL11_ARATH Thioredoxin-like 1-1, chloroplastic OS=Arabidopsis thaliana GN=At1g08570 PE=2 SV=1	0.0277505
Bhi10G000982	black	chr10	IPR031089 Bi-functional UDP-rhamnose/UDP-galactose transporter; IPR004853 Sugar phosphate transporter domain	GO:0005338 nucleotide-sugar transmembrane transporter activity; GO:0015780 nucleotide-sugar transport;	gi|659094600|ref|XP_008448146.1| PREDICTED: UDP-galactose transporter 2-like [Cucumis melo]	AT5G42420.1 | Symbols: | Nucleotide-sugar transporter family protein | chr5:16968819-16970225 FORWARD LENGTH=350	sp|Q9SRE4|UGAL2_ARATH UDP-galactose transporter 2 OS=Arabidopsis thaliana GN=UDP-GALT2 PE=2 SV=1	0.0273326
Bhi07G000555	turquoise	chr7	IPR002068 Alpha crystallin/Hsp20 domain; IPR031107 Small heat shock protein HSP20; IPR008978 HSP20-like chaperone	-	gi|315932728|gb|ADU55794.1| HSP18.1B [Citrullus lanatus]	AT1G53540.1 | Symbols: | HSP20-like chaperones superfamily protein | chr1:19980510-19980983 FORWARD LENGTH=157	sp|P13853|HS17C_ARATH 17.6 kDa class I heat shock protein 3 OS=Arabidopsis thaliana GN=HSP17.6C PE=2 SV=2	0.0272876
Bhi08G000983	green	chr8	IPR012336 Thioredoxin-like fold; IPR004045 Glutathione S-transferase, N-terminal; IPR010987 Glutathione S-transferase, C-terminal-like; IPR004046 Glutathione S-transferase, C-terminal	-	gi|778656826|ref|XP_004137407.2| PREDICTED: glutathione S-transferase U9-like [Cucumis sativus] >gi|700208896|gb|KGN63992.1| hypothetical protein Csa_1G033120 [Cucumis sativus]	AT5G62480.1 | Symbols: ATGSTU9, GST14, GST14B, GSTU9 | glutathione S-transferase tau 9 | chr5:25088775-25089566 REVERSE LENGTH=240	sp|Q9FUT0|GSTU9_ARATH Glutathione S-transferase U9 OS=Arabidopsis thaliana GN=GSTU9 PE=2 SV=1	0.0272694
Bhi03G001744	blue	chr3	-	-	gi|449464418|ref|XP_004149926.1| PREDICTED: uncharacterized protein LOC101209807 [Cucumis sativus] >gi|700199276|gb|KGN54434.1| hypothetical protein Csa_4G329560 [Cucumis sativus]	AT2G40435.1 | Symbols: | BEST Arabidopsis thaliana protein match is: transcription regulators (TAIR:AT3G56220.1); Has 289 Blast hits to 289 proteins in 30 species: Archae - 0; Bacteria - 0; Metazoa - 0; Fungi - 0; Plants - 289; Viruses - 0; Other Eukaryotes - 0 (source: NCBI BLink). | chr2:16887048-16888407 FORWARD LENGTH=158	-	0.0272229
Bhi07G001503	turquoise	chr7	IPR011527 ABC transporter type 1, transmembrane domain; IPR003439 ABC transporter-like; IPR027417 P-loop containing nucleoside triphosphate hydrolase; IPR017871 ABC transporter, conserved site; IPR003593 AAA+ ATPase domain	GO:0005524 ATP binding; GO:0006810 transport; GO:0016021 integral component of membrane; GO:0042626 ATPase activity, coupled to transmembrane movement of substances; GO:0055085 transmembrane transport;	gi|659090570|ref|XP_008446087.1| PREDICTED: putative ABC transporter C family member 15 [Cucumis melo]	AT3G13080.1 | Symbols: ATMRP3, MRP3, ABCC3 | multidrug resistance-associated protein 3 | chr3:4196019-4201250 REVERSE LENGTH=1514	sp|Q9LK64|AB3C_ARATH ABC transporter C family member 3 OS=Arabidopsis thaliana GN=ABCC3 PE=1 SV=1	0.0270571
Bhi01G002362	brown	chr1	IPR013525 ABC-2 type transporter; IPR003593 AAA+ ATPase domain; IPR027417 P-loop containing nucleoside triphosphate hydrolase; IPR003439 ABC transporter-like; IPR017871 ABC transporter, conserved site	GO:0016020 membrane;	gi|449460070|ref|XP_004147769.1| PREDICTED: ABC transporter G family member 14 [Cucumis sativus] >gi|700198313|gb|KGN53471.1| hypothetical protein Csa_4G056620 [Cucumis sativus]	AT1G31770.1 | Symbols: ABCG14 | ATP-binding cassette 14 | chr1:11375252-11377644 REVERSE LENGTH=648	sp|Q9C6W5|AB14G_ARATH ABC transporter G family member 14 OS=Arabidopsis thaliana GN=ABCG14 PE=2 SV=1	0.0268921
Bhi11G001252	yellow	chr11	IPR003657 WRKY domain	GO:0003700 transcription factor activity, sequence-specific DNA binding; GO:0006355 regulation of transcription, DNA-templated; GO:0043565 sequence-specific DNA binding;	gi|659130403|ref|XP_008465152.1| PREDICTED: probable WRKY transcription factor 40 [Cucumis melo]	AT1G80840.1 | Symbols: WRKY40, ATWRKY40 | WRKY DNA-binding protein 40 | chr1:30383834-30385356 FORWARD LENGTH=302	sp|Q9SAH7|WRK40_ARATH Probable WRKY transcription factor 40 OS=Arabidopsis thaliana GN=WRKY40 PE=1 SV=1	0.0262044
Bhi06G000447	yellow	chr6	IPR001623 DnaJ domain	-	gi|449450080|ref|XP_004142792.1| PREDICTED: uncharacterized protein LOC101222804 [Cucumis sativus] >gi|700196194|gb|KGN51371.1| hypothetical protein Csa_5G523160 [Cucumis sativus]	AT5G23240.1 | Symbols: | DNAJ heat shock N-terminal domain-containing protein | chr5:7826857-7828534 REVERSE LENGTH=465	sp|Q2YT48|DNAJ_STAAB Chaperone protein DnaJ OS=Staphylococcus aureus (strain bovine RF122 / ET3-1) GN=dnaJ PE=3 SV=1	0.0260876
Bhi10G001056	turquoise	chr10	-	-	gi|659111874|ref|XP_008455953.1| PREDICTED: uncharacterized protein LOC103496015 [Cucumis melo] >gi|778673358|ref|XP_011649979.1| PREDICTED: uncharacterized protein LOC101207576 [Cucumis sativus] >gi|700208080|gb|KGN63199.1| hypothetical protein Csa_2G408940 [Cucumis sativus]	AT2G20562.1 | Symbols: | unknown protein; LOCATED IN: endomembrane system; BEST Arabidopsis thaliana protein match is: unknown protein (TAIR:AT2G31090.1); Has 70 Blast hits to 70 proteins in 13 species: Archae - 0; Bacteria - 0; Metazoa - 0; Fungi - 0; Plants - 70; Viruses - 0; Other Eukaryotes - 0 (source: NCBI BLink). | chr2:8850367-8850835 REVERSE LENGTH=73	-	0.0259438
Bhi03G001765	yellow	chr3	IPR016140 Bifunctional inhibitor/plant lipid transfer protein/seed storage helical domain; IPR000528 Plant lipid transfer protein/Par allergen	-	gi|449467971|ref|XP_004151695.1| PREDICTED: non-specific lipid-transfer protein 1-like [Cucumis sativus] >gi|700199290|gb|KGN54448.1| Non-specific lipid-transfer protein [Cucumis sativus]	AT5G01870.1 | Symbols: | Bifunctional inhibitor/lipid-transfer protein/seed storage 2S albumin superfamily protein | chr5:337234-337678 FORWARD LENGTH=116	sp|Q43019|NLTP3_PRUDU Non-specific lipid-transfer protein 3 OS=Prunus dulcis PE=2 SV=1	0.0254587
Bhi11G002054	red	chr11	-	-	-	-	-	0.0249404
Bhi02G000302	turquoise	chr2	-	-	gi|778655775|ref|XP_011659007.1| PREDICTED: uncharacterized protein LOC105436119 [Cucumis sativus] >gi|700208520|gb|KGN63616.1| hypothetical protein Csa_1G005770 [Cucumis sativus]	AT3G48180.1 | Symbols: | unknown protein; BEST Arabidopsis thaliana protein match is: unknown protein (TAIR:AT1G19020.1); Has 84 Blast hits to 84 proteins in 15 species: Archae - 0; Bacteria - 0; Metazoa - 0; Fungi - 0; Plants - 84; Viruses - 0; Other Eukaryotes - 0 (source: NCBI BLink). | chr3:17790571-17790804 REVERSE LENGTH=77	-	0.024917
Bhi12G000389	green	chr12	IPR008581 Protein of unknown function DUF863, plant	-	gi|449459764|ref|XP_004147616.1| PREDICTED: uncharacterized protein LOC101221869 [Cucumis sativus] >gi|700195047|gb|KGN50224.1| hypothetical protein Csa_5G160760 [Cucumis sativus]	AT1G12120.1 | Symbols: | Plant protein of unknown function (DUF863) | chr1:4114933-4116469 REVERSE LENGTH=483	-	0.0248793
Bhi10G000340	turquoise	chr10	IPR016140 Bifunctional inhibitor/plant lipid transfer protein/seed storage helical domain	-	gi|778692985|ref|XP_011653558.1| PREDICTED: protein YLS3 [Cucumis sativus] >gi|700198921|gb|KGN54079.1| hypothetical protein Csa_4G280560 [Cucumis sativus]	AT1G55260.1 | Symbols: | Bifunctional inhibitor/lipid-transfer protein/seed storage 2S albumin superfamily protein | chr1:20614663-20616158 FORWARD LENGTH=227	sp|O64864|YLS3_ARATH Protein YLS3 OS=Arabidopsis thaliana GN=YLS3 PE=2 SV=1	0.0248689
Bhi03G000003	turquoise	chr3	IPR020864 Membrane attack complex component/perforin (MACPF) domain	-	gi|778721202|ref|XP_011658263.1| PREDICTED: MACPF domain-containing protein CAD1 [Cucumis sativus]	AT1G29690.1 | Symbols: CAD1 | MAC/Perforin domain-containing protein | chr1:10379310-10381861 REVERSE LENGTH=561	sp|Q9C7N2|CAD1_ARATH MACPF domain-containing protein CAD1 OS=Arabidopsis thaliana GN=CAD1 PE=2 SV=1	0.0246387
Bhi09G001106	blue	chr9	IPR023213 Chloramphenicol acetyltransferase-like domain; IPR003480 Transferase	-	gi|778726993|ref|XP_004139706.2| PREDICTED: malonyl-CoA:anthocyanidin 5-O-glucoside-6''-O-malonyltransferase-like [Cucumis sativus] >gi|700189384|gb|KGN44617.1| hypothetical protein Csa_7G343340 [Cucumis sativus]	AT3G29670.1 | Symbols: | HXXXD-type acyl-transferase family protein | chr3:11527952-11529307 FORWARD LENGTH=451	sp|Q9LRQ8|PMAT2_ARATH Phenolic glucoside malonyltransferase 2 OS=Arabidopsis thaliana GN=PMAT2 PE=1 SV=1	0.0245183
Bhi11G002364	turquoise	chr11	IPR006276 Cobalamin-independent methionine synthase; IPR013215 Cobalamin-independent methionine synthase MetE, N-terminal; IPR002629 Cobalamin-independent methionine synthase MetE, C-terminal/archaeal	GO:0003871 5-methyltetrahydropteroyltriglutamate-homocysteine S-methyltransferase activity; GO:0008270 zinc ion binding; GO:0009086 methionine biosynthetic process;	gi|659085193|ref|XP_008443293.1| PREDICTED: 5-methyltetrahydropteroyltriglutamate--homocysteine methyltransferase [Cucumis melo]	AT5G17920.2 | Symbols: ATCIMS | Cobalamin-independent synthase family protein | chr5:5935771-5939195 FORWARD LENGTH=765	sp|O50008|METE1_ARATH 5-methyltetrahydropteroyltriglutamate--homocysteine methyltransferase 1 OS=Arabidopsis thaliana GN=MS1 PE=1 SV=1	0.0245079
Bhi10G000120	brown	chr10	IPR006121 Heavy metal-associated domain, HMA	GO:0030001 metal ion transport; GO:0046872 metal ion binding;	gi|659130792|ref|XP_008465354.1| PREDICTED: heavy metal-associated isoprenylated plant protein 3-like [Cucumis melo]	AT5G60800.1 | Symbols: | Heavy metal transport/detoxification superfamily protein | chr5:24461116-24462464 REVERSE LENGTH=283	sp|Q9FJH5|HIP3_ARATH Heavy metal-associated isoprenylated plant protein 3 OS=Arabidopsis thaliana GN=HIPP3 PE=1 SV=1	0.0242692
Bhi11G001223	red	chr11	-	-	gi|778682889|ref|XP_011651805.1| PREDICTED: uncharacterized protein LOC105434941 [Cucumis sativus]	AT2G31945.1 | Symbols: | unknown protein; FUNCTIONS IN: molecular_function unknown; INVOLVED IN: biological_process unknown; LOCATED IN: endomembrane system; EXPRESSED IN: 8 plant structures; EXPRESSED DURING: 4 anthesis, petal differentiation and expansion stage; BEST Arabidopsis thaliana protein match is: unknown protein (TAIR:AT1G05575.1); Has 61 Blast hits to 61 proteins in 10 species: Archae…	-	0.0242583
Bhi01G001750	green	chr1	IPR011009 Protein kinase-like domain; IPR008271 Serine/threonine-protein kinase, active site; IPR001245 Serine-threonine/tyrosine-protein kinase catalytic domain; IPR002290 Serine/threonine/dual specificity protein kinase, catalytic domain; IPR000719 Protein kinase domain	-	gi|659129238|ref|XP_008464586.1| PREDICTED: receptor-like protein kinase FERONIA [Cucumis melo]	AT3G51550.1 | Symbols: FER | Malectin/receptor-like protein kinase family protein | chr3:19117877-19120564 REVERSE LENGTH=895	sp|Q9SCZ4|FERON_ARATH Receptor-like protein kinase FERONIA OS=Arabidopsis thaliana GN=FER PE=1 SV=1	0.024102
Bhi12G000153	green	chr12	-	-	-	-	-	0.0239828
Bhi10G000699	green	chr10	IPR013320 Concanavalin A-like lectin/glucanase domain; IPR000719 Protein kinase domain; IPR013210 Leucine-rich repeat-containing N-terminal, plant-type; IPR032675 Leucine-rich repeat domain, L domain-like; IPR011009 Protein kinase-like domain; IPR001611 Leucine-rich repeat; IPR017441 Protein kinase, ATP binding site	-	gi|449444334|ref|XP_004139930.1| PREDICTED: probable inactive receptor kinase At5g58300 [Cucumis sativus] >gi|778712948|ref|XP_011656965.1| PREDICTED: probable inactive receptor kinase At5g58300 [Cucumis sativus] >gi|700191562|gb|KGN46766.1| hypothetical protein Csa_6G133750 [Cucumis sativus]	AT5G58300.2 | Symbols: | Leucine-rich repeat protein kinase family protein | chr5:23572821-23574871 FORWARD LENGTH=654	sp|Q9LVM0|Y5830_ARATH Probable inactive receptor kinase At5g58300 OS=Arabidopsis thaliana GN=At5g58300 PE=2 SV=1	0.0239458
Bhi10G000959	brown	chr10	IPR020946 Flavin monooxygenase-like; IPR023753 FAD/NAD(P)-binding domain; IPR012143 Dimethylaniline monooxygenase, N-oxide-forming	GO:0004499 N,N-dimethylaniline monooxygenase activity; GO:0050660 flavin adenine dinucleotide binding; GO:0050661 NADP binding; GO:0055114 oxidation-reduction process;	gi|1035404872|ref|XP_016900536.1| PREDICTED: probable flavin-containing monooxygenase 1 [Cucumis melo]	AT1G19250.1 | Symbols: FMO1 | flavin-dependent monooxygenase 1 | chr1:6650656-6653053 REVERSE LENGTH=530	sp|Q9LMA1|FMO1_ARATH Probable flavin-containing monooxygenase 1 OS=Arabidopsis thaliana GN=FMO1 PE=2 SV=1	0.0238565
Bhi02G001257	turquoise	chr2	IPR000555 JAB1/MPN/MOV34 metalloenzyme domain	GO:0005515 protein binding;	gi|659083627|ref|XP_008442454.1| PREDICTED: 26S proteasome non-ATPase regulatory subunit 7 homolog A [Cucumis melo]	AT3G11270.2 | Symbols: MEE34 | Mov34/MPN/PAD-1 family protein | chr3:3528989-3531317 FORWARD LENGTH=307	sp|Q9C774|PSD7B_ARATH 26S proteasome non-ATPase regulatory subunit 7 homolog B OS=Arabidopsis thaliana GN=RPN8B PE=1 SV=1	0.0235553
Bhi09G002149	brown	chr9	IPR000719 Protein kinase domain; IPR032675 Leucine-rich repeat domain, L domain-like; IPR011009 Protein kinase-like domain; IPR001611 Leucine-rich repeat; IPR017441 Protein kinase, ATP binding site; IPR003591 Leucine-rich repeat, typical subtype; IPR008271 Serine/threonine-protein kinase, active site; IPR002290 Serine/threonine/dual specificity protein kinase, catalytic domain	GO:0004672 protein kinase activity; GO:0005524 ATP binding; GO:0006468 protein phosphorylation;	gi|1035425677|ref|XP_008466101.2| PREDICTED: LOW QUALITY PROTEIN: receptor-like protein kinase HSL1 [Cucumis melo]	AT5G49660.1 | Symbols: | Leucine-rich repeat transmembrane protein kinase family protein | chr5:20161401-20164534 REVERSE LENGTH=966	sp|Q9SGP2|HSL1_ARATH Receptor-like protein kinase HSL1 OS=Arabidopsis thaliana GN=HSL1 PE=2 SV=1	0.0232942
Bhi01G000385	yellow	chr1	-	-	gi|659074890|ref|XP_008437851.1| PREDICTED: zyxin-like [Cucumis melo]	AT2G46630.1 | Symbols: | unknown protein; LOCATED IN: chloroplast; EXPRESSED IN: 22 plant structures; EXPRESSED DURING: 13 growth stages; Has 110095 Blast hits to 59224 proteins in 2216 species: Archae - 177; Bacteria - 15429; Metazoa - 38345; Fungi - 18843; Plants - 13341; Viruses - 3084; Other Eukaryotes - 20876 (source: NCBI BLink). | chr2:19145529-19146713 FORWARD LENGTH=394	-	0.0229579
Bhi02G001803	turquoise	chr2	IPR025886 Phloem protein 2-like	-	gi|700210925|gb|KGN66021.1| hypothetical protein Csa_1G568500 [Cucumis sativus]	AT1G56250.1 | Symbols: AtPP2-B14, PP2-B14 | phloem protein 2-B14 | chr1:21061746-21062844 REVERSE LENGTH=282	sp|Q9C7K0|VBF_ARATH F-box protein VBF OS=Arabidopsis thaliana GN=VBF PE=1 SV=1	0.0227558
Bhi10G000276	black	chr10	IPR000719 Protein kinase domain; IPR001480 Bulb-type lectin domain; IPR013320 Concanavalin A-like lectin/glucanase domain; IPR017441 Protein kinase, ATP binding site; IPR002290 Serine/threonine/dual specificity protein kinase, catalytic domain; IPR011009 Protein kinase-like domain; IPR008271 Serine/threonine-protein kinase, active site; IPR024171 S-receptor-like serine/threonine-protein kinase	GO:0004672 protein kinase activity; GO:0005524 ATP binding; GO:0006468 protein phosphorylation;	gi|778693119|ref|XP_011653581.1| PREDICTED: G-type lectin S-receptor-like serine/threonine-protein kinase RLK1 [Cucumis sativus]	AT5G60900.1 | Symbols: RLK1 | receptor-like protein kinase 1 | chr5:24498467-24501494 REVERSE LENGTH=748	sp|Q0JEU6|LERK3_ORYSJ G-type lectin S-receptor-like serine/threonine-protein kinase LECRK3 OS=Oryza sativa subsp. japonica GN=LECRK3 PE=3 SV=2	0.0223693
Bhi12G002135	yellow	chr12	IPR010399 Tify domain; IPR018467 CO/COL/TOC1, conserved site	-	gi|778711756|ref|XP_011656792.1| PREDICTED: protein TIFY 9-like [Cucumis sativus] >gi|700191216|gb|KGN46420.1| hypothetical protein Csa_6G091930 [Cucumis sativus]	AT5G13220.1 | Symbols: JAZ10, TIFY9, JAS1 | jasmonate-zim-domain protein 10 | chr5:4219001-4220502 FORWARD LENGTH=197	sp|Q93ZM9|TIF9_ARATH Protein TIFY 9 OS=Arabidopsis thaliana GN=TIFY9 PE=1 SV=1	0.0223681
Bhi06G000481	turquoise	chr6	IPR003441 NAC domain	GO:0003677 DNA binding; GO:0006355 regulation of transcription, DNA-templated;	gi|659117850|ref|XP_008458820.1| PREDICTED: NAC domain-containing protein 8 isoform X1 [Cucumis melo]	AT3G01600.1 | Symbols: anac044, NAC044 | NAC domain containing protein 44 | chr3:229365-231105 FORWARD LENGTH=370	sp|Q6NQK2|NAC8_ARATH NAC domain-containing protein 8 OS=Arabidopsis thaliana GN=NAC008 PE=2 SV=1	0.0216247
Bhi05G000809	red	chr5	-	-	-	-	-	0.0216194
Bhi11G000706	turquoise	chr11	-	-	-	-	-	0.0214108
Bhi08G000618	brown	chr8	IPR002495 Glycosyl transferase, family 8; IPR029044 Nucleotide-diphospho-sugar transferases	GO:0016757 transferase activity, transferring glycosyl groups;	gi|659127227|ref|XP_008463593.1| PREDICTED: galactinol synthase 2-like [Cucumis melo]	AT1G56600.1 | Symbols: AtGolS2, GolS2 | galactinol synthase 2 | chr1:21207620-21209291 FORWARD LENGTH=335	sp|C7G304|GOLS2_SOLLC Galactinol synthase 2 OS=Solanum lycopersicum GN=GOLS2 PE=2 SV=1	0.0213898
Bhi08G001017	brown	chr8	IPR016181 Acyl-CoA N-acyltransferase	-	gi|700209020|gb|KGN64116.1| hypothetical protein Csa_1G042280 [Cucumis sativus]	-	-	0.0213463
Bhi08G001416	turquoise	chr8	IPR008930 Terpenoid cyclases/protein prenyltransferase alpha-alpha toroid; IPR008949 Isoprenoid synthase domain; IPR001906 Terpene synthase, N-terminal domain; IPR005630 Terpene synthase, metal-binding domain	-	gi|778664890|ref|XP_011648431.1| PREDICTED: (3S,6E)-nerolidol synthase 1-like [Cucumis sativus] >gi|700209490|gb|KGN64586.1| hypothetical protein Csa_1G066550 [Cucumis sativus]	AT1G61680.1 | Symbols: TPS14, ATTPS14 | terpene synthase 14 | chr1:22772455-22774687 REVERSE LENGTH=569	sp|P0CV94|NES1_FRAAN (3S,6E)-nerolidol synthase 1 OS=Fragaria ananassa PE=1 SV=1	0.0212979
Bhi04G000186	blue	chr4	IPR002885 Pentatricopeptide repeat; IPR011990 Tetratricopeptide-like helical domain; IPR032867 DYW domain	-	gi|659088019|ref|XP_008444757.1| PREDICTED: pentatricopeptide repeat-containing protein At1g19720 [Cucumis melo]	AT1G19720.1 | Symbols: | Pentatricopeptide repeat (PPR-like) superfamily protein | chr1:6819926-6822610 REVERSE LENGTH=894	sp|Q9FXH1|PPR52_ARATH Pentatricopeptide repeat-containing protein At1g19720 OS=Arabidopsis thaliana GN=DYW7 PE=2 SV=1	0.0212238
Bhi09G000763	brown	chr9	IPR012334 Pectin lyase fold; IPR006501 Pectinesterase inhibitor domain; IPR011050 Pectin lyase fold/virulence factor; IPR018040 Pectinesterase, active site; IPR000070 Pectinesterase, catalytic	-	gi|449436465|ref|XP_004136013.1| PREDICTED: probable pectinesterase/pectinesterase inhibitor 7 [Cucumis sativus] >gi|700189743|gb|KGN44976.1| Pectinesterase [Cucumis sativus]	AT1G02810.1 | Symbols: | Plant invertase/pectin methylesterase inhibitor superfamily | chr1:618284-620333 FORWARD LENGTH=579	sp|Q9SRX4|PME7_ARATH Probable pectinesterase/pectinesterase inhibitor 7 OS=Arabidopsis thaliana GN=PME7 PE=2 SV=1	0.0210824
Bhi06G000290	turquoise	chr6	IPR012417 Calmodulin-binding domain, plant	GO:0005516 calmodulin binding;	gi|778707381|ref|XP_004141582.2| PREDICTED: uncharacterized protein LOC101213671 [Cucumis sativus]	AT5G39380.1 | Symbols: | Plant calmodulin-binding protein-related | chr5:15759163-15760686 REVERSE LENGTH=507	-	0.0209692
Bhi03G001552	blue	chr3	-	-	gi|700199076|gb|KGN54234.1| hypothetical protein Csa_4G294910 [Cucumis sativus]	AT5G59613.2 | Symbols: | unknown protein; FUNCTIONS IN: molecular_function unknown; INVOLVED IN: biological_process unknown; LOCATED IN: mitochondrial respiratory chain complex III; BEST Arabidopsis thaliana protein match is: unknown protein (TAIR:AT3G46430.1). | chr5:24015726-24016500 REVERSE LENGTH=55	-	0.0207634
Bhi03G001539	green	chr3	IPR017972 Cytochrome P450, conserved site; IPR001128 Cytochrome P450; IPR002401 Cytochrome P450, E-class, group I	GO:0016705 oxidoreductase activity, acting on paired donors, with incorporation or reduction of molecular oxygen; GO:0055114 oxidation-reduction process;	gi|778718023|ref|XP_004142036.2| PREDICTED: alkane hydroxylase MAH1-like [Cucumis sativus] >gi|700193231|gb|KGN48435.1| hypothetical protein Csa_6G487560 [Cucumis sativus]	AT2G23180.1 | Symbols: CYP96A1 | cytochrome P450, family 96, subfamily A, polypeptide 1 | chr2:9874953-9876503 FORWARD LENGTH=516	sp|Q9FVS9|C96AF_ARATH Alkane hydroxylase MAH1 OS=Arabidopsis thaliana GN=CYP96A15 PE=2 SV=1	0.0200273
Bhi09G002730	green	chr9	-	-	gi|449446999|ref|XP_004141257.1| PREDICTED: uncharacterized protein LOC101214397 isoform X1 [Cucumis sativus]	AT5G42900.3 | Symbols: | cold regulated gene 27 | chr5:17198366-17199712 REVERSE LENGTH=245	-	0.0200048
BhiUN900G1	yellow	Contig900	IPR031095 Protein FLOWERING LOCUS T; IPR008914 Phosphatidylethanolamine-binding protein PEBP	GO:0008429 phosphatidylethanolamine binding; GO:0009909 regulation of flower development; GO:0048573 photoperiodism, flowering;	gi|793419578|ref|NP_001292686.1| protein HEADING DATE 3A [Cucumis sativus] >gi|659085875|ref|XP_008443654.1| PREDICTED: protein HEADING DATE 3A [Cucumis melo] >gi|224775503|dbj|BAH28253.1| FT-like protein [Cucumis sativus]	AT1G65480.1 | Symbols: FT | PEBP (phosphatidylethanolamine-binding protein) family protein | chr1:24331510-24333689 FORWARD LENGTH=175	sp|Q93WI9|HD3A_ORYSJ Protein HEADING DATE 3A OS=Oryza sativa subsp. japonica GN=HD3A PE=1 SV=1	0.0198829
Bhi07G000704	blue	chr7	-	-	gi|659091972|ref|XP_008446832.1| PREDICTED: ACT domain-containing protein ACR10-like [Cucumis melo]	AT2G36840.1 | Symbols: | ACT-like superfamily protein | chr2:15451834-15453550 REVERSE LENGTH=410	sp|Q9SJM1|ACR10_ARATH ACT domain-containing protein ACR10 OS=Arabidopsis thaliana GN=ACR10 PE=2 SV=1	0.0198362
Bhi08G001682	turquoise	chr8	-	-	-	-	-	0.0198122
Bhi06G000820	turquoise	chr6	IPR022812 Dynamin superfamily; IPR003130 Dynamin GTPase effector; IPR027417 P-loop containing nucleoside triphosphate hydrolase; IPR030381 Dynamin-type guanine nucleotide-binding (G) domain; IPR001401 Dynamin, GTPase domain; IPR000375 Dynamin central domain; IPR020850 GTPase effector domain	-	gi|659082260|ref|XP_008441747.1| PREDICTED: dynamin-related protein 4C-like isoform X1 [Cucumis melo]	AT1G60500.1 | Symbols: DRP4C | Dynamin related protein 4C | chr1:22291582-22293822 FORWARD LENGTH=669	sp|Q9ZP55|DRP4C_ARATH Dynamin-related protein 4C OS=Arabidopsis thaliana GN=DRP4C PE=2 SV=1	0.0197116
Bhi03G000947	black	chr3	-	-	gi|1035395890|ref|XP_016899241.1| PREDICTED: uncharacterized protein LOC103485003 [Cucumis melo]	AT5G65207.1 | Symbols: | unknown protein; BEST Arabidopsis thaliana protein match is: unknown protein (TAIR:AT5G10040.1); Has 30201 Blast hits to 17322 proteins in 780 species: Archae - 12; Bacteria - 1396; Metazoa - 17338; Fungi - 3422; Plants - 5037; Viruses - 0; Other Eukaryotes - 2996 (source: NCBI BLink). | chr5:26052364-26052585 REVERSE LENGTH=73	-	0.0194744
Bhi03G001353	yellow	chr3	IPR020381 Proteinase inhibitor I25, cystatin, conserved region	-	gi|659083303|ref|XP_008442277.1| PREDICTED: cysteine proteinase inhibitor A-like [Cucumis melo]	-	-	0.0194057
Bhi03G000666	blue	chr3	IPR017972 Cytochrome P450, conserved site; IPR001128 Cytochrome P450; IPR002401 Cytochrome P450, E-class, group I	GO:0016705 oxidoreductase activity, acting on paired donors, with incorporation or reduction of molecular oxygen; GO:0055114 oxidation-reduction process;	gi|449434188|ref|XP_004134878.1| PREDICTED: cytochrome P450 84A1 [Cucumis sativus] >gi|700193688|gb|KGN48892.1| hypothetical protein Csa_6G504720 [Cucumis sativus]	AT4G36220.1 | Symbols: FAH1, CYP84A1 | ferulic acid 5-hydroxylase 1 | chr4:17137584-17139619 REVERSE LENGTH=520	sp|Q42600|C84A1_ARATH Cytochrome P450 84A1 OS=Arabidopsis thaliana GN=CYP84A1 PE=1 SV=1	0.019402
Bhi01G001274	turquoise	chr1	IPR032675 Leucine-rich repeat domain, L domain-like	-	gi|449445900|ref|XP_004140710.1| PREDICTED: uncharacterized protein At4g06744 [Cucumis sativus] >gi|700202374|gb|KGN57507.1| hypothetical protein Csa_3G200180 [Cucumis sativus]	AT1G49750.1 | Symbols: | Leucine-rich repeat (LRR) family protein | chr1:18411177-18412779 REVERSE LENGTH=494	sp|Q8W3M4|Y4744_ARATH Uncharacterized protein At4g06744 OS=Arabidopsis thaliana GN=At4g06744 PE=2 SV=1	0.0192558
Bhi02G000330	yellow	chr2	IPR016163 Aldehyde dehydrogenase, C-terminal; IPR016160 Aldehyde dehydrogenase, cysteine active site; IPR016161 Aldehyde/histidinol dehydrogenase; IPR016162 Aldehyde dehydrogenase N-terminal domain; IPR015590 Aldehyde dehydrogenase domain; IPR029510 Aldehyde dehydrogenase, glutamic acid active site	GO:0008152 metabolic process; GO:0016491 oxidoreductase activity; GO:0016620 oxidoreductase activity, acting on the aldehyde or oxo group of donors, NAD or NADP as acceptor; GO:0055114 oxidation-reduction process;	gi|659105457|ref|XP_008453101.1| PREDICTED: aldehyde dehydrogenase family 2 member B4, mitochondrial-like [Cucumis melo]	AT3G48000.1 | Symbols: ALDH2B4, ALDH2, ALDH2A | aldehyde dehydrogenase 2B4 | chr3:17717082-17719843 REVERSE LENGTH=538	sp|Q9SU63|AL2B4_ARATH Aldehyde dehydrogenase family 2 member B4, mitochondrial OS=Arabidopsis thaliana GN=ALDH2B4 PE=2 SV=1	0.0192174
Bhi01G001948	red	chr1	IPR008004 Uncharacterised protein family UPF0503	-	gi|778690424|ref|XP_011653117.1| PREDICTED: uncharacterized protein LOC105435176 [Cucumis sativus] >gi|700198058|gb|KGN53216.1| hypothetical protein Csa_4G026920 [Cucumis sativus]	-	-	0.0190046
Bhi08G001683	blue	chr8	-	-	-	-	-	0.0189725
Bhi10G000997	turquoise	chr10	IPR010402 CCT domain; IPR000315 B-box-type zinc finger	GO:0005515 protein binding;	gi|449444452|ref|XP_004139988.1| PREDICTED: zinc finger protein CONSTANS-LIKE 9-like isoform X2 [Cucumis sativus]	AT3G07650.4 | Symbols: COL9 | CONSTANS-like 9 | chr3:2442494-2443901 FORWARD LENGTH=372	sp|Q9SSE5|COL9_ARATH Zinc finger protein CONSTANS-LIKE 9 OS=Arabidopsis thaliana GN=COL9 PE=2 SV=1	0.018733
Bhi05G000220	turquoise	chr5	IPR029058 Alpha/Beta hydrolase fold; IPR017395 Chlorophyllase	-	gi|659131543|ref|XP_008465739.1| PREDICTED: chlorophyllase-1-like [Cucumis melo]	AT1G19670.1 | Symbols: ATCLH1, CORI1, ATHCOR1, CLH1 | chlorophyllase 1 | chr1:6803796-6804923 REVERSE LENGTH=324	sp|O22527|CLH1_ARATH Chlorophyllase-1 OS=Arabidopsis thaliana GN=CLH1 PE=1 SV=1	0.0187073
Bhi10G001390	yellow	chr10	IPR003441 NAC domain	GO:0003677 DNA binding; GO:0006355 regulation of transcription, DNA-templated;	gi|449459190|ref|XP_004147329.1| PREDICTED: NAC domain-containing protein 2 [Cucumis sativus] >gi|700207120|gb|KGN62239.1| hypothetical protein Csa_2G338830 [Cucumis sativus]	AT1G01720.1 | Symbols: ATAF1, ANAC002 | NAC (No Apical Meristem) domain transcriptional regulator superfamily protein | chr1:268471-269514 FORWARD LENGTH=289	sp|Q39013|NAC2_ARATH NAC domain-containing protein 2 OS=Arabidopsis thaliana GN=NAC002 PE=2 SV=2	0.0186975
Bhi01G000542	yellow	chr1	IPR011992 EF-hand domain pair; IPR002048 EF-hand domain; IPR018247 EF-Hand 1, calcium-binding site	-	gi|449432650|ref|XP_004134112.1| PREDICTED: calmodulin-like protein 11 [Cucumis sativus] >gi|659076295|ref|XP_008438603.1| PREDICTED: calmodulin-like protein 11 [Cucumis melo] >gi|700201798|gb|KGN56931.1| hypothetical protein Csa_3G144210 [Cucumis sativus]	AT3G22930.1 | Symbols: CML11 | calmodulin-like 11 | chr3:8124286-8125835 REVERSE LENGTH=173	sp|Q9LIK5|CML11_ARATH Calmodulin-like protein 11 OS=Arabidopsis thaliana GN=CML11 PE=2 SV=1	0.0185488
Bhi01G001000	turquoise	chr1	IPR001471 AP2/ERF domain; IPR016177 DNA-binding domain	GO:0003700 transcription factor activity, sequence-specific DNA binding; GO:0006355 regulation of transcription, DNA-templated;	gi|449446069|ref|XP_004140794.1| PREDICTED: dehydration-responsive element-binding protein 1A [Cucumis sativus] >gi|700202204|gb|KGN57337.1| hypothetical protein Csa_3G180260 [Cucumis sativus]	AT5G51990.1 | Symbols: CBF4, DREB1D | C-repeat-binding factor 4 | chr5:21117113-21117787 REVERSE LENGTH=224	sp|Q9FJ93|DRE1D_ARATH Dehydration-responsive element-binding protein 1D OS=Arabidopsis thaliana GN=DREB1D PE=2 SV=1	0.0185033
Bhi10G000906	red	chr10	IPR022251 Protein of unknown function wound-induced	-	gi|700191479|gb|KGN46683.1| hypothetical protein Csa_6G123980 [Cucumis sativus]	-	-	0.0184409
Bhi05G000807	red	chr5	IPR028144 Cysteine-rich transmembrane CYSTM domain	-	gi|1141984237|gb|ONK65460.1| uncharacterized protein A4U43_C07F37340 [Asparagus officinalis]	-	-	0.0183126
Bhi12G000728	black	chr12	IPR003406 Glycosyl transferase, family 14	GO:0008375 acetylglucosaminyltransferase activity; GO:0016020 membrane;	gi|659072972|ref|XP_008467193.1| PREDICTED: uncharacterized protein LOC103504601 [Cucumis melo]	AT1G68390.1 | Symbols: | Core-2/I-branching beta-1,6-N-acetylglucosaminyltransferase family protein | chr1:25642838-25645484 FORWARD LENGTH=408	-	0.0180447
Bhi09G002344	red	chr9	IPR006814 Photosystem II PsbR	GO:0009523 photosystem II; GO:0009654 photosystem II oxygen evolving complex; GO:0015979 photosynthesis; GO:0042651 thylakoid membrane;	gi|595876424|ref|XP_007212214.1| photosystem II 10 kDa polypeptide, chloroplastic [Prunus persica] >gi|1139777904|gb|ONI12091.1| hypothetical protein PRUPE_4G143700 [Prunus persica]	AT1G79040.1 | Symbols: PSBR | photosystem II subunit R | chr1:29736085-29736781 FORWARD LENGTH=140	sp|P06183|PSBR_SOLTU Photosystem II 10 kDa polypeptide, chloroplastic OS=Solanum tuberosum GN=PSBR PE=2 SV=1	0.0179923
Bhi01G000730	yellow	chr1	-	-	gi|778678931|ref|XP_004134219.2| PREDICTED: uncharacterized protein DDB_G0271670 [Cucumis sativus] >gi|700201991|gb|KGN57124.1| hypothetical protein Csa_3G159440 [Cucumis sativus]	AT5G49100.1 | Symbols: | unknown protein; BEST Arabidopsis thaliana protein match is: unknown protein (TAIR:AT3G06868.1); Has 30201 Blast hits to 17322 proteins in 780 species: Archae - 12; Bacteria - 1396; Metazoa - 17338; Fungi - 3422; Plants - 5037; Viruses - 0; Other Eukaryotes - 2996 (source: NCBI BLink). | chr5:19897700-19898890 REVERSE LENGTH=396	-	0.0178839
Bhi11G001608	yellow	chr11	IPR031107 Small heat shock protein HSP20; IPR008978 HSP20-like chaperone; IPR002068 Alpha crystallin/Hsp20 domain	-	gi|315932706|gb|ADU55783.1| HSP22.8 [Citrullus lanatus]	AT1G07400.1 | Symbols: | HSP20-like chaperones superfamily protein | chr1:2275148-2275621 FORWARD LENGTH=157	sp|P02519|HSP11_SOYBN 17.3 kDa class I heat shock protein OS=Glycine max GN=HSP17.3-B PE=3 SV=1	0.0178671
Bhi07G000880	turquoise	chr7	-	-	-	-	-	0.017801
Bhi03G001117	green	chr3	IPR013830 SGNH hydrolase-type esterase domain; IPR001087 GDSL lipase/esterase	-	gi|659125185|ref|XP_008462554.1| PREDICTED: GDSL esterase/lipase At5g03610-like [Cucumis melo]	AT5G03610.1 | Symbols: | GDSL-like Lipase/Acylhydrolase superfamily protein | chr5:915650-918326 FORWARD LENGTH=359	sp|Q9LZS7|GDL71_ARATH GDSL esterase/lipase At5g03610 OS=Arabidopsis thaliana GN=At5g03610 PE=2 SV=1	0.0176506
Bhi06G000731	green	chr6	IPR004342 EXS, C-terminal; IPR004331 SPX domain	GO:0016021 integral component of membrane;	gi|449452068|ref|XP_004143782.1| PREDICTED: phosphate transporter PHO1 homolog 3-like [Cucumis sativus] >gi|700195995|gb|KGN51172.1| hypothetical protein Csa_5G471600 [Cucumis sativus]	AT1G14040.1 | Symbols: | EXS (ERD1/XPR1/SYG1) family protein | chr1:4810488-4814543 FORWARD LENGTH=813	sp|Q6R8G7|PHO13_ARATH Phosphate transporter PHO1 homolog 3 OS=Arabidopsis thaliana GN=PHO1;H3 PE=2 SV=2	0.0176262
Bhi04G001509	green	chr4	IPR001789 Signal transduction response regulator, receiver domain; IPR011006 CheY-like superfamily	GO:0000160 phosphorelay signal transduction system;	gi|659133431|ref|XP_008466725.1| PREDICTED: two-component response regulator ORR9-like isoform X2 [Cucumis melo]	AT3G57040.1 | Symbols: ARR9, ATRR4 | response regulator 9 | chr3:21110059-21111228 FORWARD LENGTH=234	sp|O80366|ARR9_ARATH Two-component response regulator ARR9 OS=Arabidopsis thaliana GN=ARR9 PE=1 SV=1	0.017473
Bhi11G002015	black	chr11	IPR032799 Xylanase inhibitor, C-terminal; IPR001969 Aspartic peptidase, active site; IPR001461 Aspartic peptidase; IPR021109 Aspartic peptidase domain; IPR032861 Xylanase inhibitor, N-terminal	-	gi|659084466|ref|XP_008442902.1| PREDICTED: aspartic proteinase nepenthesin-2 [Cucumis melo]	AT3G52500.1 | Symbols: | Eukaryotic aspartyl protease family protein | chr3:19465644-19467053 REVERSE LENGTH=469	sp|Q766C2|NEP2_NEPGR Aspartic proteinase nepenthesin-2 OS=Nepenthes gracilis GN=nep2 PE=1 SV=1	0.0174428
Bhi08G001667	brown	chr8	IPR003663 Sugar/inositol transporter; IPR005828 Major facilitator, sugar transporter-like; IPR020846 Major facilitator superfamily domain; IPR005829 Sugar transporter, conserved site	GO:0016020 membrane; GO:0022891 substrate-specific transmembrane transporter activity; GO:0055085 transmembrane transport;	gi|659068462|ref|XP_008444543.1| PREDICTED: probable inositol transporter 2 [Cucumis melo]	AT1G30220.1 | Symbols: ATINT2, INT2 | inositol transporter 2 | chr1:10632957-10635439 REVERSE LENGTH=580	sp|Q9C757|INT2_ARATH Probable inositol transporter 2 OS=Arabidopsis thaliana GN=INT2 PE=1 SV=1	0.017407
Bhi11G001939	blue	chr11	IPR023296 Glycosyl hydrolase, five-bladed beta-propellor domain; IPR013148 Glycosyl hydrolase family 32, N-terminal; IPR013189 Glycosyl hydrolase family 32, C-terminal; IPR013320 Concanavalin A-like lectin/glucanase domain; IPR018053 Glycoside hydrolase, family 32, active site; IPR001362 Glycoside hydrolase, family 32	-	gi|449462946|ref|XP_004149196.1| PREDICTED: beta-fructofuranosidase, insoluble isoenzyme 1-like [Cucumis sativus] >gi|700204017|gb|KGN59150.1| hypothetical protein Csa_3G777580 [Cucumis sativus]	AT3G52600.1 | Symbols: AtcwINV2, CWINV2 | cell wall invertase 2 | chr3:19507080-19509273 REVERSE LENGTH=590	sp|P26792|INV1_DAUCA Beta-fructofuranosidase, insoluble isoenzyme 1 OS=Daucus carota GN=INV1 PE=1 SV=1	0.0173892
Bhi08G001447	yellow	chr8	IPR027443 Isopenicillin N synthase-like; IPR005123 Oxoglutarate/iron-dependent dioxygenase; IPR026992 Non-haem dioxygenase N-terminal domain	-	gi|659067819|ref|XP_008441451.1| PREDICTED: gibberellin 2-beta-dioxygenase 8 isoform X2 [Cucumis melo]	AT4G21200.1 | Symbols: ATGA2OX8, GA2OX8 | gibberellin 2-oxidase 8 | chr4:11302751-11306601 FORWARD LENGTH=338	sp|O49561|G2OX8_ARATH Gibberellin 2-beta-dioxygenase 8 OS=Arabidopsis thaliana GN=GA2OX8 PE=1 SV=2	0.0172441
Bhi11G000764	red	chr11	IPR003851 Zinc finger, Dof-type	GO:0003677 DNA binding; GO:0006355 regulation of transcription, DNA-templated; GO:0016760 cellulose synthase (UDP-forming) activity; GO:0030244 cellulose biosynthetic process;	gi|449432966|ref|XP_004134269.1| PREDICTED: dof zinc finger protein DOF5.7 [Cucumis sativus] >gi|700201182|gb|KGN56315.1| hypothetical protein Csa_3G115040 [Cucumis sativus]	AT5G65590.1 | Symbols: | Dof-type zinc finger DNA-binding family protein | chr5:26212084-26213034 REVERSE LENGTH=316	sp|Q9LSL6|DOF57_ARATH Dof zinc finger protein DOF5.7 OS=Arabidopsis thaliana GN=DOF5.7 PE=2 SV=1	0.0172237
Bhi11G001246	yellow	chr11	IPR001623 DnaJ domain	-	gi|659130374|ref|XP_008465135.1| PREDICTED: chaperone protein dnaJ 8, chloroplastic [Cucumis melo]	AT1G80920.1 | Symbols: J8 | Chaperone DnaJ-domain superfamily protein | chr1:30403863-30404549 REVERSE LENGTH=163	sp|Q9SAG8|DNAJ8_ARATH Chaperone protein dnaJ 8, chloroplastic OS=Arabidopsis thaliana GN=ATJ8 PE=2 SV=1	0.0171526
Bhi03G000697	yellow	chr3	IPR015813 Pyruvate/Phosphoenolpyruvate kinase-like domain; IPR008322 Uncharacterised protein family UPF0261; IPR009215 TIM-barrel domain, IGPS-like; IPR013785 Aldolase-type TIM barrel	GO:0003824 catalytic activity;	gi|449464548|ref|XP_004149991.1| PREDICTED: uncharacterized protein LOC101205995 [Cucumis sativus]	AT5G66420.2 | Symbols: | LOCATED IN: cellular_component unknown; EXPRESSED IN: 23 plant structures; EXPRESSED DURING: 13 growth stages; CONTAINS InterPro DOMAIN/s: Uncharacterised conserved protein UCP033271 (InterPro:IPR008322), TIM-barrel signal transduction protein, predicted (InterPro:IPR009215); Has 1232 Blast hits to 1230 proteins in 311 species: Archae - 18; Bacteria - 959; Metazoa - 1; Fu…	sp|A4FLF6|Y5696_SACEN UPF0261 protein SACE_5696 OS=Saccharopolyspora erythraea (strain ATCC 11635 / DSM 40517 / JCM 4748 / NBRC 13426 / NCIMB 8594 / NRRL 2338) GN=SACE_5696 PE=3 SV=1	0.0167556
Bhi12G000139	turquoise	chr12	-	-	gi|659074028|ref|XP_008437383.1| PREDICTED: uncharacterized protein LOC103482815 [Cucumis melo]	-	-	0.0167167
Bhi09G002443	blue	chr9	-	-	gi|659104300|ref|XP_008452891.1| PREDICTED: uncharacterized protein LOC103493778 [Cucumis melo]	AT5G11070.1 | Symbols: | unknown protein; Has 1807 Blast hits to 1807 proteins in 277 species: Archae - 0; Bacteria - 0; Metazoa - 736; Fungi - 347; Plants - 385; Viruses - 0; Other Eukaryotes - 339 (source: NCBI BLink). | chr5:3516440-3516898 REVERSE LENGTH=152	-	0.0162395
Bhi09G000629	green	chr9	IPR016040 NAD(P)-binding domain; IPR002347 Glucose/ribitol dehydrogenase; IPR002198 Short-chain dehydrogenase/reductase SDR	-	gi|449436725|ref|XP_004136143.1| PREDICTED: short-chain dehydrogenase reductase 3b-like [Cucumis sativus] >gi|700189820|gb|KGN45053.1| hypothetical protein Csa_7G414500 [Cucumis sativus]	AT2G47140.1 | Symbols: | NAD(P)-binding Rossmann-fold superfamily protein | chr2:19350970-19352059 REVERSE LENGTH=257	sp|Q94K41|SDR3B_ARATH Short-chain dehydrogenase reductase 3b OS=Arabidopsis thaliana GN=SDR3b PE=2 SV=1	0.0160495
Bhi11G000332	black	chr11	IPR008998 Agglutinin domain; IPR023307 Aerolysin-like toxin, beta complex domain	-	gi|778711447|ref|XP_011656733.1| PREDICTED: uncharacterized protein LOC101208849 [Cucumis sativus]	-	sp|Q66S17|NATT3_THANI Natterin-3 OS=Thalassophryne nattereri PE=1 SV=1	0.0159983
Bhi01G002734	brown	chr1	-	-	gi|449468970|ref|XP_004152194.1| PREDICTED: phosphatidylcholine:diacylglycerol cholinephosphotransferase 1-like [Cucumis sativus] >gi|700197752|gb|KGN52910.1| hypothetical protein Csa_4G006170 [Cucumis sativus]	AT3G15820.1 | Symbols: ROD1 | phosphatidic acid phosphatase-related / PAP2-related | chr3:5351217-5353573 FORWARD LENGTH=301	sp|Q9LVZ7|PDCT1_ARATH Phosphatidylcholine:diacylglycerol cholinephosphotransferase 1 OS=Arabidopsis thaliana GN=ROD1 PE=1 SV=1	0.0159812
Bhi12G000147	brown	chr12	-	-	gi|700194857|gb|KGN50034.1| hypothetical protein Csa_5G151500 [Cucumis sativus]	AT5G41761.1 | Symbols: | unknown protein; FUNCTIONS IN: molecular_function unknown; INVOLVED IN: biological_process unknown; LOCATED IN: cellular_component unknown; BEST Arabidopsis thaliana protein match is: unknown protein (TAIR:AT3G55570.1); Has 30201 Blast hits to 17322 proteins in 780 species: Archae - 12; Bacteria - 1396; Metazoa - 17338; Fungi - 3422; Plants - 5037; Viruses - 0; Other Euka…	-	0.0157045
Bhi09G002507	green	chr9	-	-	gi|778696825|ref|XP_004151217.2| PREDICTED: protein GLUTAMINE DUMPER 5-like [Cucumis sativus] >gi|700200246|gb|KGN55404.1| hypothetical protein Csa_4G650230 [Cucumis sativus]	AT4G31730.1 | Symbols: GDU1 | glutamine dumper 1 | chr4:15361207-15361683 FORWARD LENGTH=158	sp|O81775|GDU1_ARATH Protein GLUTAMINE DUMPER 1 OS=Arabidopsis thaliana GN=GDU1 PE=1 SV=1	0.0156348
BhiUN576G1	blue	Contig576	-	-	gi|1036551169|ref|NP_001315397.1| RNA-dependent RNA polymerase 1 [Cucumis melo] >gi|948561981|gb|ALM88236.1| RNA-dependent RNA polymerase 1a [Cucumis melo]	AT1G14790.1 | Symbols: RDR1, ATRDRP1 | RNA-dependent RNA polymerase 1 | chr1:5094317-5097817 REVERSE LENGTH=1107	sp|Q9LQV2|RDR1_ARATH RNA-dependent RNA polymerase 1 OS=Arabidopsis thaliana GN=RDR1 PE=2 SV=1	0.0155321
Bhi04G000307	brown	chr4	-	-	gi|700207401|gb|KGN62520.1| hypothetical protein Csa_2G359890 [Cucumis sativus]	-	-	0.015456
Bhi02G000804	turquoise	chr2	IPR014712 Phosphoinositide-binding clathrin adaptor, domain 2; IPR013809 ENTH domain; IPR011417 AP180 N-terminal homology (ANTH) domain; IPR008942 ENTH/VHS	GO:0005545 1-phosphatidylinositol binding; GO:0030136 clathrin-coated vesicle; GO:0030276 clathrin binding; GO:0048268 clathrin coat assembly;	gi|659086502|ref|XP_008443967.1| PREDICTED: putative clathrin assembly protein At2g25430 [Cucumis melo]	AT4G32285.2 | Symbols: | ENTH/ANTH/VHS superfamily protein | chr4:15586003-15587910 FORWARD LENGTH=635	sp|Q8S9J8|CAP1_ARATH Probable clathrin assembly protein At4g32285 OS=Arabidopsis thaliana GN=At4g32285 PE=1 SV=2	0.0153849
BhiUN118G96	green	Contig118_3	-	-	gi|659115379|ref|XP_008457527.1| PREDICTED: uncharacterized protein LOC103497198 [Cucumis melo]	AT2G28410.1 | Symbols: | unknown protein; Has 18 Blast hits to 18 proteins in 5 species: Archae - 0; Bacteria - 0; Metazoa - 0; Fungi - 0; Plants - 18; Viruses - 0; Other Eukaryotes - 0 (source: NCBI BLink). | chr2:12156202-12156549 FORWARD LENGTH=115	-	0.0152305
Bhi10G001483	brown	chr10	IPR001623 DnaJ domain	-	gi|778674187|ref|XP_004147068.2| PREDICTED: chaperone protein dnaJ 11, chloroplastic-like [Cucumis sativus] >gi|700206794|gb|KGN61913.1| hypothetical protein Csa_2G264570 [Cucumis sativus]	AT2G17880.1 | Symbols: | Chaperone DnaJ-domain superfamily protein | chr2:7767176-7767658 REVERSE LENGTH=160	sp|Q9FYB5|DNJ11_ARATH Chaperone protein dnaJ 11, chloroplastic OS=Arabidopsis thaliana GN=ATJ11 PE=1 SV=2	0.0150899
Bhi02G001184	turquoise	chr2	IPR021410 The fantastic four family	-	gi|449442619|ref|XP_004139078.1| PREDICTED: protein FAF-like, chloroplastic [Cucumis sativus] >gi|700211496|gb|KGN66592.1| hypothetical protein Csa_1G635920 [Cucumis sativus]	AT5G22090.2 | Symbols: | Protein of unknown function (DUF3049) | chr5:7315003-7316394 REVERSE LENGTH=463	sp|Q0V865|FAFL_ARATH Protein FAF-like, chloroplastic OS=Arabidopsis thaliana GN=At5g22090 PE=2 SV=1	0.0148753
Bhi11G001271	turquoise	chr11	IPR013121 Ferric reductase, NAD binding domain; IPR013112 FAD-binding 8; IPR013130 Ferric reductase transmembrane component-like domain; IPR002048 EF-hand domain; IPR011992 EF-hand domain pair; IPR018247 EF-Hand 1, calcium-binding site; IPR013623 NADPH oxidase Respiratory burst; IPR000778 Cytochrome b245, heavy chain; IPR017927 Ferredoxin reductase-type FAD-binding domain; IPR017938 Riboflavin sy…	GO:0016491 oxidoreductase activity; GO:0055114 oxidation-reduction process;	gi|282927332|gb|ACF05504.2| respiratory burst oxidase-like protein [Citrullus colocynthis]	AT5G47910.1 | Symbols: RBOHD, ATRBOHD | respiratory burst oxidase homologue D | chr5:19397585-19401768 FORWARD LENGTH=921	sp|Q2HXL0|RBOHC_SOLTU Respiratory burst oxidase homolog protein C OS=Solanum tuberosum GN=RBOHC PE=1 SV=2	0.0147125
Bhi10G000305	turquoise	chr10	IPR000008 C2 domain; IPR013583 Phosphoribosyltransferase C-terminal	GO:0005515 protein binding;	gi|659097685|ref|XP_008449758.1| PREDICTED: protein QUIRKY-like [Cucumis melo] >gi|1035406084|ref|XP_016900718.1| PREDICTED: protein QUIRKY-like [Cucumis melo]	AT3G57880.1 | Symbols: | Calcium-dependent lipid-binding (CaLB domain) plant phosphoribosyltransferase family protein | chr3:21431198-21433519 REVERSE LENGTH=773	sp|Q9FL59|FTIP1_ARATH FT-interacting protein 1 OS=Arabidopsis thaliana GN=FTIP1 PE=1 SV=1	0.0144693
Bhi11G002369	blue	chr11	-	-	gi|778685305|ref|XP_011652200.1| PREDICTED: zinc transporter ZIP6 [Cucumis sativus]	-	sp|O04132|SRC1_SOYBN Protein SRC1 OS=Glycine max GN=SRC1 PE=2 SV=1	0.0143474
Bhi07G000388	turquoise	chr7	IPR012677 Nucleotide-binding alpha-beta plait domain; IPR007855 RNA-dependent RNA polymerase, eukaryotic-type; IPR000504 RNA recognition motif domain	GO:0000166 nucleotide binding;	gi|659130594|ref|XP_008465250.1| PREDICTED: RNA-dependent RNA polymerase 1 [Cucumis melo] >gi|659130596|ref|XP_008465251.1| PREDICTED: RNA-dependent RNA polymerase 1 [Cucumis melo] >gi|659130600|ref|XP_008465253.1| PREDICTED: RNA-dependent RNA polymerase 1 [Cucumis melo] >gi|659130602|ref|XP_008465254.1| PREDICTED: RNA-dependent RNA polymerase 1 [Cucumis melo]	AT1G14790.1 | Symbols: RDR1, ATRDRP1 | RNA-dependent RNA polymerase 1 | chr1:5094317-5097817 REVERSE LENGTH=1107	sp|Q9LQV2|RDR1_ARATH RNA-dependent RNA polymerase 1 OS=Arabidopsis thaliana GN=RDR1 PE=2 SV=1	0.0141489
Bhi10G001884	brown	chr10	IPR003657 WRKY domain	GO:0003700 transcription factor activity, sequence-specific DNA binding; GO:0006355 regulation of transcription, DNA-templated; GO:0043565 sequence-specific DNA binding;	gi|449461451|ref|XP_004148455.1| PREDICTED: probable WRKY transcription factor 13 [Cucumis sativus] >gi|700206979|gb|KGN62098.1| hypothetical protein Csa_2G297220 [Cucumis sativus]	AT4G39410.1 | Symbols: WRKY13, ATWRKY13 | WRKY DNA-binding protein 13 | chr4:18332937-18334789 REVERSE LENGTH=304	sp|Q9SVB7|WRK13_ARATH Probable WRKY transcription factor 13 OS=Arabidopsis thaliana GN=WRKY13 PE=2 SV=1	0.013964
Bhi07G001295	yellow	chr7	IPR003106 Leucine zipper, homeobox-associated; IPR001356 Homeobox domain; IPR000047 Helix-turn-helix motif; IPR009057 Homeodomain-like; IPR017970 Homeobox, conserved site	GO:0003700 transcription factor activity, sequence-specific DNA binding; GO:0006355 regulation of transcription, DNA-templated; GO:0043565 sequence-specific DNA binding;	gi|449434806|ref|XP_004135187.1| PREDICTED: homeobox-leucine zipper protein ATHB-13 [Cucumis sativus] >gi|700196721|gb|KGN51898.1| hypothetical protein Csa_5G604920 [Cucumis sativus]	AT1G69780.1 | Symbols: ATHB13 | Homeobox-leucine zipper protein family | chr1:26259166-26260465 FORWARD LENGTH=294	sp|Q8LC03|ATB13_ARATH Homeobox-leucine zipper protein ATHB-13 OS=Arabidopsis thaliana GN=ATHB-13 PE=2 SV=2	0.0138037
Bhi01G000935	blue	chr1	IPR000008 C2 domain	GO:0005515 protein binding;	gi|778679668|ref|XP_011651176.1| PREDICTED: uncharacterized protein LOC101213996 [Cucumis sativus] >gi|700202268|gb|KGN57401.1| hypothetical protein Csa_3G183350 [Cucumis sativus]	AT5G23950.1 | Symbols: | Calcium-dependent lipid-binding (CaLB domain) family protein | chr5:8082789-8083448 FORWARD LENGTH=219	-	0.0136615
Bhi07G001051	turquoise	chr7	IPR002528 Multi antimicrobial extrusion protein	GO:0006855 drug transmembrane transport; GO:0015238 drug transmembrane transporter activity; GO:0015297 antiporter activity; GO:0016020 membrane; GO:0055085 transmembrane transport;	gi|659091679|ref|XP_008446674.1| PREDICTED: protein DETOXIFICATION 10-like isoform X1 [Cucumis melo]	AT1G15150.1 | Symbols: | MATE efflux family protein | chr1:5212674-5214723 FORWARD LENGTH=487	sp|Q8VYL8|DTX10_ARATH Protein DETOXIFICATION 10 OS=Arabidopsis thaliana GN=DTX10 PE=2 SV=1	0.0136479
Bhi06G000873	yellow	chr6	IPR009091 Regulator of chromosome condensation 1/beta-lactamase-inhibitor protein II; IPR000408 Regulator of chromosome condensation, RCC1	-	gi|659123522|ref|XP_008461709.1| PREDICTED: ultraviolet-B receptor UVR8 isoform X2 [Cucumis melo]	AT3G55580.1 | Symbols: | Regulator of chromosome condensation (RCC1) family protein | chr3:20612766-20615730 FORWARD LENGTH=488	sp|Q9FN03|UVR8_ARATH Ultraviolet-B receptor UVR8 OS=Arabidopsis thaliana GN=UVR8 PE=1 SV=1	0.013532
BhiUN625G1	brown	Contig625	IPR001128 Cytochrome P450; IPR002401 Cytochrome P450, E-class, group I; IPR017972 Cytochrome P450, conserved site	GO:0005506 iron ion binding; GO:0016705 oxidoreductase activity, acting on paired donors, with incorporation or reduction of molecular oxygen; GO:0020037 heme binding; GO:0055114 oxidation-reduction process;	gi|659103028|ref|XP_008452436.1| PREDICTED: cytochrome P450 CYP72A219-like [Cucumis melo]	AT3G14610.1 | Symbols: CYP72A7 | cytochrome P450, family 72, subfamily A, polypeptide 7 | chr3:4912565-4914503 FORWARD LENGTH=512	sp|H2DH21|C7A29_PANGI Cytochrome P450 CYP72A219 OS=Panax ginseng PE=2 SV=1	0.0134571
Bhi01G002054	turquoise	chr1	-	-	gi|1035426683|ref|XP_016903700.1| PREDICTED: extensin-2-like, partial [Cucumis melo]	AT3G12440.1 | Symbols: | Polynucleotidyl transferase, ribonuclease H-like superfamily protein | chr3:3951199-3952260 REVERSE LENGTH=353	sp|Q8IXT5|RB12B_HUMAN RNA-binding protein 12B OS=Homo sapiens GN=RBM12B PE=1 SV=2	0.0134452
Bhi12G000410	turquoise	chr12	IPR016040 NAD(P)-binding domain; IPR001557 L-lactate/malate dehydrogenase; IPR015955 Lactate dehydrogenase/glycoside hydrolase, family 4, C-terminal; IPR022383 Lactate/malate dehydrogenase, C-terminal; IPR011304 L-lactate dehydrogenase; IPR001236 Lactate/malate dehydrogenase, N-terminal; IPR018177 L-lactate dehydrogenase, active site	-	gi|1035392027|ref|XP_008437100.2| PREDICTED: L-lactate dehydrogenase A [Cucumis melo]	AT4G17260.1 | Symbols: | Lactate/malate dehydrogenase family protein | chr4:9674057-9675309 FORWARD LENGTH=353	sp|P22988|LDHA_HORVU L-lactate dehydrogenase A OS=Hordeum vulgare PE=1 SV=1	0.0132713
Bhi09G001696	turquoise	chr9	-	-	gi|449459768|ref|XP_004147618.1| PREDICTED: U5 small nuclear ribonucleoprotein 200 kDa helicase [Cucumis sativus] >gi|700202051|gb|KGN57184.1| hypothetical protein Csa_3G168950 [Cucumis sativus]	AT1G20960.2 | Symbols: emb1507 | U5 small nuclear ribonucleoprotein helicase, putative | chr1:7302591-7309914 REVERSE LENGTH=2171	sp|Q9SYP1|DEXHC_ARATH DExH-box ATP-dependent RNA helicase DExH12 OS=Arabidopsis thaliana GN=BRR2A PE=1 SV=1	0.0132047
Bhi08G000192	red	chr8	IPR006563 POX domain; IPR008422 Homeobox KN domain; IPR009057 Homeodomain-like; IPR001356 Homeobox domain	-	gi|659071981|ref|XP_008462889.1| PREDICTED: homeobox protein BEL1 homolog isoform X2 [Cucumis melo]	AT2G27990.1 | Symbols: BLH8, PNF | BEL1-like homeodomain 8 | chr2:11921540-11923902 REVERSE LENGTH=584	sp|Q9SJJ3|BLH8_ARATH BEL1-like homeodomain protein 8 OS=Arabidopsis thaliana GN=BLH8 PE=1 SV=1	0.0130193
Bhi11G001325	green	chr11	IPR001810 F-box domain	GO:0005515 protein binding;	gi|449446732|ref|XP_004141125.1| PREDICTED: F-box protein At2g26850-like [Cucumis sativus] >gi|700204595|gb|KGN59728.1| hypothetical protein Csa_3G842010 [Cucumis sativus]	AT2G32560.1 | Symbols: | F-box family protein | chr2:13824820-13826761 FORWARD LENGTH=371	sp|Q8RY82|FB121_ARATH F-box protein At2g32560 OS=Arabidopsis thaliana GN=At2g32560 PE=2 SV=1	0.0130127
Bhi09G001617	green	chr9	IPR004853 Sugar phosphate transporter domain; IPR004696 Triose phosphate/phosphoenolpyruvate translocator	-	gi|778664167|ref|XP_011660235.1| PREDICTED: glucose-6-phosphate/phosphate translocator 2, chloroplastic-like [Cucumis sativus] >gi|700211599|gb|KGN66695.1| hypothetical protein Csa_1G660150 [Cucumis sativus]	AT1G61800.1 | Symbols: GPT2, ATGPT2 | glucose-6-phosphate/phosphate translocator 2 | chr1:22824527-22826459 FORWARD LENGTH=388	sp|Q94B38|GPT2_ARATH Glucose-6-phosphate/phosphate translocator 2, chloroplastic OS=Arabidopsis thaliana GN=GPT2 PE=2 SV=2	0.0129452
Bhi01G001851	brown	chr1	IPR000315 B-box-type zinc finger	GO:0005622 intracellular; GO:0008270 zinc ion binding;	gi|449457560|ref|XP_004146516.1| PREDICTED: B-box zinc finger protein 18-like [Cucumis sativus] >gi|700198167|gb|KGN53325.1| hypothetical protein Csa_4G047370 [Cucumis sativus]	AT4G38960.1 | Symbols: | B-box type zinc finger family protein | chr4:18161576-18163045 FORWARD LENGTH=183	sp|C0SVM5|BBX19_ARATH B-box zinc finger protein 19 OS=Arabidopsis thaliana GN=BBX19 PE=2 SV=1	0.0128929
Bhi04G001377	green	chr4	-	-	gi|22001410|gb|AAM88422.1|AF527384_1 extensin [Brassica napus]	-	-	0.0128199
Bhi02G000697	yellow	chr2	IPR003388 Reticulon	-	gi|659086313|ref|XP_008443867.1| PREDICTED: reticulon-like protein B21 [Cucumis melo]	AT5G58000.1 | Symbols: | Reticulon family protein | chr5:23477416-23479496 FORWARD LENGTH=487	sp|Q56X72|RTNLS_ARATH Reticulon-like protein B21 OS=Arabidopsis thaliana GN=RTNLB21 PE=2 SV=2	0.0127319
Bhi03G000577	brown	chr3	IPR023346 Lysozyme-like domain; IPR000726 Glycoside hydrolase, family 19, catalytic; IPR016283 Glycoside hydrolase, family 19	-	gi|449434094|ref|XP_004134831.1| PREDICTED: endochitinase-like [Cucumis sativus] >gi|700193779|gb|KGN48983.1| hypothetical protein Csa_6G509030 [Cucumis sativus]	AT3G12500.1 | Symbols: ATHCHIB, PR3, PR-3, CHI-B, B-CHI, HCHIB | basic chitinase | chr3:3962501-3963984 REVERSE LENGTH=335	sp|P52403|CHI1_SOLTU Endochitinase 1 (Fragment) OS=Solanum tuberosum GN=CHTB1 PE=2 SV=1	0.0124829
Bhi01G000344	black	chr1	IPR018490 Cyclic nucleotide-binding-like; IPR005821 Ion transport domain; IPR014710 RmlC-like jelly roll fold	-	gi|659074989|ref|XP_008437904.1| PREDICTED: cyclic nucleotide-gated ion channel 1-like [Cucumis melo]	AT5G53130.1 | Symbols: CNGC1, ATCNGC1 | cyclic nucleotide gated channel 1 | chr5:21537830-21540490 REVERSE LENGTH=716	sp|O65717|CNGC1_ARATH Cyclic nucleotide-gated ion channel 1 OS=Arabidopsis thaliana GN=CNGC1 PE=1 SV=1	0.0123911
Bhi01G001364	yellow	chr1	IPR006032 Ribosomal protein S12/S23; IPR012340 Nucleic acid-binding, OB-fold; IPR005679 Ribosomal protein S12, bacteria	GO:0003735 structural constituent of ribosome; GO:0005622 intracellular; GO:0005840 ribosome; GO:0006412 translation;	gi|584592168|dbj|BAO50919.1| ribosomal protein S12 (mitochondrion) [Hevea brasiliensis]	ATMG00980.1 | Symbols: RPSL2 | Ribosomal protein S12/S23 family protein | chrM:260224-260601 REVERSE LENGTH=125	sp|P27070|RT12_PANGI Ribosomal protein S12, mitochondrial OS=Panax ginseng GN=RPS12 PE=3 SV=1	0.0123688
Bhi06G000544	brown	chr6	-	-	-	-	-	0.0122275
Bhi02G001301	yellow	chr2	IPR028919 Viral movement protein	-	gi|700211398|gb|KGN66494.1| hypothetical protein Csa_1G614640 [Cucumis sativus]	-	-	0.0120561
Bhi06G000145	yellow	chr6	IPR012336 Thioredoxin-like fold; IPR011424 C1-like; IPR017937 Thioredoxin, conserved site	-	gi|659119202|ref|XP_008459528.1| PREDICTED: probable nucleoredoxin 1 [Cucumis melo]	AT1G60420.1 | Symbols: | DC1 domain-containing protein | chr1:22261978-22264243 FORWARD LENGTH=578	sp|O80763|NRX1_ARATH Probable nucleoredoxin 1 OS=Arabidopsis thaliana GN=At1g60420 PE=1 SV=1	0.011931
BhiUN1931G1	blue	Contig1931	IPR027942 Sieve element occlusion, N-terminal	-	gi|778668879|ref|XP_011649167.1| PREDICTED: uncharacterized protein LOC101222989 [Cucumis sativus] >gi|700206519|gb|KGN61638.1| hypothetical protein Csa_2G196890 [Cucumis sativus]	AT3G01680.1 | Symbols: | CONTAINS InterPro DOMAIN/s: Mediator complex subunit Med28 (InterPro:IPR021640); BEST Arabidopsis thaliana protein match is: unknown protein (TAIR:AT3G01670.1); Has 122 Blast hits to 112 proteins in 13 species: Archae - 0; Bacteria - 0; Metazoa - 0; Fungi - 0; Plants - 122; Viruses - 0; Other Eukaryotes - 0 (source: NCBI BLink). | chr3:252033-255246 FORWARD LENGTH=740	sp|Q9SS87|SEOB_ARATH Protein SIEVE ELEMENT OCCLUSION B OS=Arabidopsis thaliana GN=SEOB PE=1 SV=1	0.011888
Bhi12G001093	blue	chr12	IPR019448 EEIG1/EHBP1 N-terminal domain	-	gi|449445218|ref|XP_004140370.1| PREDICTED: uncharacterized protein PFB0145c isoform X1 [Cucumis sativus] >gi|778702539|ref|XP_011655222.1| PREDICTED: uncharacterized protein PFB0145c isoform X1 [Cucumis sativus]	AT1G22060.1 | Symbols: | LOCATED IN: vacuole; EXPRESSED IN: 23 plant structures; EXPRESSED DURING: 13 growth stages; BEST Arabidopsis thaliana protein match is: FBD, F-box and Leucine Rich Repeat domains containing protein (TAIR:AT1G22000.1); Has 84739 Blast hits to 38714 proteins in 2257 species: Archae - 1436; Bacteria - 11314; Metazoa - 40747; Fungi - 7706; Plants - 4675; Viruses - 308; Other …	-	0.0118798
Bhi02G000569	black	chr2	IPR029039 Flavoprotein-like domain; IPR023208 NADPH-cytochrome P450 reductase; IPR017927 Ferredoxin reductase-type FAD-binding domain; IPR008254 Flavodoxin/nitric oxide synthase; IPR001094 Flavodoxin-like; IPR001433 Oxidoreductase FAD/NAD(P)-binding; IPR017938 Riboflavin synthase-like beta-barrel; IPR023173 NADPH-cytochrome p450 reductase, FAD-binding, alpha-helical domain-3; IPR001709 Flavoprote…	-	gi|449457161|ref|XP_004146317.1| PREDICTED: NADPH--cytochrome P450 reductase 2-like [Cucumis sativus] >gi|698029646|gb|AIT72028.1| cytochrome P450 reductase [Cucumis sativus] >gi|700210361|gb|KGN65457.1| hypothetical protein Csa_1G423150 [Cucumis sativus]	AT4G30210.2 | Symbols: ATR2, AR2 | P450 reductase 2 | chr4:14796900-14800578 FORWARD LENGTH=711	sp|Q05001|NCPR_CATRO NADPH--cytochrome P450 reductase OS=Catharanthus roseus GN=CPR PE=2 SV=1	0.0115796
Bhi08G001478	blue	chr8	-	-	gi|449474397|ref|XP_004154160.1| PREDICTED: uncharacterized protein LOC101211799 [Cucumis sativus]	-	-	0.0113701
Bhi07G001145	red	chr7	-	-	gi|449434670|ref|XP_004135119.1| PREDICTED: protein CHUP1, chloroplastic [Cucumis sativus] >gi|778705878|ref|XP_011655756.1| PREDICTED: protein CHUP1, chloroplastic [Cucumis sativus] >gi|700196863|gb|KGN52040.1| hypothetical protein Csa_5G608280 [Cucumis sativus]	AT3G25690.2 | Symbols: CHUP1 | Hydroxyproline-rich glycoprotein family protein | chr3:9354061-9357757 FORWARD LENGTH=1004	sp|Q9LI74|CHUP1_ARATH Protein CHUP1, chloroplastic OS=Arabidopsis thaliana GN=CHUP1 PE=1 SV=1	0.0113452
Bhi01G001742	red	chr1	IPR002290 Serine/threonine/dual specificity protein kinase, catalytic domain; IPR013320 Concanavalin A-like lectin/glucanase domain; IPR011009 Protein kinase-like domain; IPR017441 Protein kinase, ATP binding site; IPR024788 Malectin-like carbohydrate-binding domain; IPR000719 Protein kinase domain; IPR008271 Serine/threonine-protein kinase, active site; IPR001245 Serine-threonine/tyrosine-protei…	GO:0004672 protein kinase activity; GO:0005524 ATP binding; GO:0006468 protein phosphorylation;	gi|449438965|ref|XP_004137258.1| PREDICTED: receptor-like protein kinase FERONIA [Cucumis sativus] >gi|700198634|gb|KGN53792.1| hypothetical protein Csa_4G129580 [Cucumis sativus]	AT3G51550.1 | Symbols: FER | Malectin/receptor-like protein kinase family protein | chr3:19117877-19120564 REVERSE LENGTH=895	sp|Q9SCZ4|FERON_ARATH Receptor-like protein kinase FERONIA OS=Arabidopsis thaliana GN=FER PE=1 SV=1	0.0113322
Bhi04G000486	blue	chr4	-	-	gi|700207244|gb|KGN62363.1| hypothetical protein Csa_2G350460 [Cucumis sativus]	AT1G27850.1 | Symbols: | unknown protein; FUNCTIONS IN: molecular_function unknown; INVOLVED IN: biological_process unknown; LOCATED IN: plasma membrane; EXPRESSED IN: 22 plant structures; EXPRESSED DURING: 13 growth stages; BEST Arabidopsis thaliana protein match is: unknown protein (TAIR:AT2G40070.1); Has 9215 Blast hits to 5316 proteins in 473 species: Archae - 6; Bacteria - 773; Metazoa - 339…	-	0.0111724
Bhi12G000127	turquoise	chr12	IPR001661 Glycoside hydrolase, family 37; IPR018232 Glycoside hydrolase, family 37, conserved site; IPR008928 Six-hairpin glycosidase-like	GO:0004555 alpha,alpha-trehalase activity; GO:0005991 trehalose metabolic process; GO:0010411 xyloglucan metabolic process; GO:0016762 xyloglucan; GO:0042546 cell wall biogenesis; GO:0006073 cellular glucan metabolic process;	gi|659074046|ref|XP_008437392.1| PREDICTED: probable trehalase [Cucumis melo]	AT4G24040.1 | Symbols: ATTRE1, TRE1 | trehalase 1 | chr4:12488242-12491060 FORWARD LENGTH=626	sp|Q9SU50|TRE1_ARATH Trehalase OS=Arabidopsis thaliana GN=TRE1 PE=2 SV=1	0.0111688
Bhi05G000334	green	chr5	-	-	-	-	-	0.0110752
Bhi11G001051	blue	chr11	IPR001005 SANT/Myb domain; IPR017930 Myb domain; IPR009057 Homeodomain-like	-	gi|659108626|ref|XP_008454301.1| PREDICTED: myb-related protein 308-like [Cucumis melo]	AT2G47460.1 | Symbols: MYB12, ATMYB12, PFG1 | myb domain protein 12 | chr2:19476438-19479242 FORWARD LENGTH=371	sp|P27898|MYBP_MAIZE Myb-related protein P OS=Zea mays GN=P PE=2 SV=1	0.0110442
Bhi11G001373	turquoise	chr11	IPR002902 Gnk2-homologous domain; IPR002290 Serine/threonine/dual specificity protein kinase, catalytic domain; IPR011009 Protein kinase-like domain; IPR008271 Serine/threonine-protein kinase, active site; IPR000719 Protein kinase domain; IPR001245 Serine-threonine/tyrosine-protein kinase catalytic domain; IPR013320 Concanavalin A-like lectin/glucanase domain	-	gi|659085690|ref|XP_008443549.1| PREDICTED: cysteine-rich receptor-like protein kinase 42 [Cucumis melo]	AT5G40380.1 | Symbols: CRK42 | cysteine-rich RLK (RECEPTOR-like protein kinase) 42 | chr5:16152121-16155038 FORWARD LENGTH=651	sp|Q9FNE1|CRK42_ARATH Cysteine-rich receptor-like protein kinase 42 OS=Arabidopsis thaliana GN=CRK42 PE=2 SV=1	0.0109
Bhi04G001835	turquoise	chr4	IPR003496 ABA/WDS induced protein	GO:0006950 response to stress;	gi|449441222|ref|XP_004138381.1| PREDICTED: abscisic stress-ripening protein 1-like [Cucumis sativus] >gi|700190658|gb|KGN45862.1| hypothetical protein Csa_6G014820 [Cucumis sativus]	-	sp|P37219|ASR2_SOLLC Abscisic stress-ripening protein 2 OS=Solanum lycopersicum GN=ASR2 PE=4 SV=1	0.0106816
Bhi07G000243	blue	chr7	IPR000719 Protein kinase domain; IPR003527 Mitogen-activated protein (MAP) kinase, conserved site; IPR017441 Protein kinase, ATP binding site; IPR002290 Serine/threonine/dual specificity protein kinase, catalytic domain; IPR011009 Protein kinase-like domain	GO:0004672 protein kinase activity; GO:0005524 ATP binding; GO:0006468 protein phosphorylation;	gi|659109484|ref|XP_008454742.1| PREDICTED: mitogen-activated protein kinase 9-like isoform X1 [Cucumis melo] >gi|659109488|ref|XP_008454744.1| PREDICTED: mitogen-activated protein kinase 9-like isoform X1 [Cucumis melo] >gi|659109490|ref|XP_008454745.1| PREDICTED: mitogen-activated protein kinase 9-like isoform X1 [Cucumis melo] >gi|659109492|ref|XP_008454746.1| PREDICTED: mitogen-activated prot…	AT3G18040.1 | Symbols: MPK9 | MAP kinase 9 | chr3:6174800-6178150 FORWARD LENGTH=510	sp|Q5Z9J0|MPK12_ORYSJ Mitogen-activated protein kinase 12 OS=Oryza sativa subsp. japonica GN=MPK12 PE=1 SV=2	0.0106714
Bhi01G000225	brown	chr1	-	-	gi|449432203|ref|XP_004133889.1| PREDICTED: uncharacterized protein LOC101208043 [Cucumis sativus] >gi|700201426|gb|KGN56559.1| hypothetical protein Csa_3G124790 [Cucumis sativus]	AT4G00770.1 | Symbols: | unknown protein; Has 127 Blast hits to 120 proteins in 33 species: Archae - 0; Bacteria - 2; Metazoa - 6; Fungi - 8; Plants - 62; Viruses - 3; Other Eukaryotes - 46 (source: NCBI BLink). | chr4:331195-333050 FORWARD LENGTH=440	-	0.0105325
Bhi11G001801	red	chr11	IPR005027 Glycosyl transferase, family 43; IPR029044 Nucleotide-diphospho-sugar transferases	GO:0015018 galactosylgalactosylxylosylprotein 3-beta-glucuronosyltransferase activity; GO:0016020 membrane;	gi|449440075|ref|XP_004137810.1| PREDICTED: probable beta-1,4-xylosyltransferase IRX9 isoform X1 [Cucumis sativus] >gi|700203809|gb|KGN58942.1| hypothetical protein Csa_3G736900 [Cucumis sativus]	AT2G37090.1 | Symbols: IRX9 | Nucleotide-diphospho-sugar transferases superfamily protein | chr2:15587671-15589223 REVERSE LENGTH=351	sp|Q9ZQC6|IRX9_ARATH Probable beta-1,4-xylosyltransferase IRX9 OS=Arabidopsis thaliana GN=IRX9 PE=2 SV=1	0.0105167
Bhi04G000193	turquoise	chr4	IPR030184 WAT1-related protein; IPR000620 EamA domain	GO:0016021 integral component of membrane; GO:0022857 transmembrane transporter activity;	gi|449469925|ref|XP_004152669.1| PREDICTED: protein WALLS ARE THIN 1 [Cucumis sativus] >gi|700207523|gb|KGN62642.1| Mtn21-like protein [Cucumis sativus]	AT1G75500.2 | Symbols: WAT1 | Walls Are Thin 1 | chr1:28338282-28340091 REVERSE LENGTH=389	sp|Q94AP3|WAT1_ARATH Protein WALLS ARE THIN 1 OS=Arabidopsis thaliana GN=WAT1 PE=1 SV=1	0.0103358
Bhi02G001303	black	chr2	IPR028919 Viral movement protein	-	gi|700211397|gb|KGN66493.1| hypothetical protein Csa_1G614140 [Cucumis sativus]	-	sp|P05396|MVP_CERV Movement protein OS=Carnation etched ring virus GN=ORF I PE=3 SV=1	0.0102233
Bhi12G001479	green	chr12	-	-	-	-	-	0.0101058
Bhi04G000331	yellow	chr4	IPR005516 Remorin, C-terminal	-	gi|659087739|ref|XP_008444612.1| PREDICTED: uncharacterized protein LOC103487882 [Cucumis melo]	AT1G45207.2 | Symbols: | Remorin family protein | chr1:17130703-17133548 REVERSE LENGTH=555	-	0.0100976
Bhi09G001265	brown	chr9	IPR001563 Peptidase S10, serine carboxypeptidase; IPR018202 Peptidase S10, serine carboxypeptidase, active site; IPR029058 Alpha/Beta hydrolase fold	GO:0004185 serine-type carboxypeptidase activity; GO:0006508 proteolysis;	gi|659123111|ref|XP_008461495.1| PREDICTED: serine carboxypeptidase-like 42 isoform X1 [Cucumis melo]	AT5G42240.1 | Symbols: scpl42 | serine carboxypeptidase-like 42 | chr5:16888717-16890931 FORWARD LENGTH=473	sp|Q9FH05|SCP42_ARATH Serine carboxypeptidase-like 42 OS=Arabidopsis thaliana GN=SCPL42 PE=2 SV=1	0.0100272
Bhi09G002148	blue	chr9	IPR001611 Leucine-rich repeat; IPR008271 Serine/threonine-protein kinase, active site; IPR017441 Protein kinase, ATP binding site; IPR000719 Protein kinase domain; IPR002290 Serine/threonine/dual specificity protein kinase, catalytic domain; IPR032675 Leucine-rich repeat domain, L domain-like; IPR003591 Leucine-rich repeat, typical subtype; IPR011009 Protein kinase-like domain; IPR013210 Leucine-…	GO:0005515 protein binding;	gi|659132252|ref|XP_008466102.1| PREDICTED: receptor-like protein kinase HAIKU2 [Cucumis melo]	AT1G09970.1 | Symbols: LRR XI-23, RLK7 | Leucine-rich receptor-like protein kinase family protein | chr1:3252408-3255428 FORWARD LENGTH=976	sp|Q9LJM4|IKU2_ARATH Receptor-like protein kinase HAIKU2 OS=Arabidopsis thaliana GN=IKU2 PE=1 SV=1	0.00972259
Bhi09G000207	turquoise	chr9	IPR006501 Pectinesterase inhibitor domain	GO:0004857 enzyme inhibitor activity;	gi|449447960|ref|XP_004141734.1| PREDICTED: pectinesterase-like [Cucumis sativus] >gi|700190204|gb|KGN45437.1| hypothetical protein Csa_7G447990 [Cucumis sativus]	AT1G53830.1 | Symbols: ATPME2, PME2 | pectin methylesterase 2 | chr1:20098562-20100745 FORWARD LENGTH=587	sp|P83948|PME3_CITSI Pectinesterase 3 OS=Citrus sinensis PE=1 SV=1	0.00962716
Bhi09G000921	black	chr9	IPR000270 PB1 domain; IPR003311 AUX/IAA protein	GO:0005515 protein binding;	gi|449458448|ref|XP_004146959.1| PREDICTED: auxin-induced protein 22D-like [Cucumis sativus] >gi|700189531|gb|KGN44764.1| hypothetical protein Csa_7G378530 [Cucumis sativus]	AT1G04240.1 | Symbols: SHY2, IAA3 | AUX/IAA transcriptional regulator family protein | chr1:1128564-1129319 REVERSE LENGTH=189	sp|O24542|AX22D_VIGRR Auxin-induced protein 22D OS=Vigna radiata var. radiata GN=AUX22D PE=2 SV=1	0.00941862
Bhi05G001062	red	chr5	IPR020846 Major facilitator superfamily domain; IPR003663 Sugar/inositol transporter; IPR005828 Major facilitator, sugar transporter-like; IPR005829 Sugar transporter, conserved site	-	gi|778726170|ref|XP_004148312.2| PREDICTED: polyol transporter 5-like [Cucumis sativus] >gi|700189090|gb|KGN44323.1| Sugar transporter [Cucumis sativus]	AT3G18830.1 | Symbols: ATPLT5, PMT5, ATPMT5 | polyol/monosaccharide transporter 5 | chr3:6489000-6491209 REVERSE LENGTH=539	sp|Q8VZ80|PLT5_ARATH Polyol transporter 5 OS=Arabidopsis thaliana GN=PLT5 PE=1 SV=2	0.00920655
Bhi09G000050	turquoise	chr9	IPR014002 Agenet domain, plant type; IPR008395 Agenet-like domain	-	gi|659122301|ref|XP_008461068.1| PREDICTED: uncharacterized protein LOC103499769 isoform X2 [Cucumis melo]	AT4G32440.2 | Symbols: | Plant Tudor-like RNA-binding protein | chr4:15657295-15659354 FORWARD LENGTH=393	sp|O22897|DUF6_ARATH DUF724 domain-containing protein 6 OS=Arabidopsis thaliana GN=DUF6 PE=2 SV=1	0.00918603
Bhi11G001622	green	chr11	IPR021825 Protein RETICULATA-related	-	gi|449440303|ref|XP_004137924.1| PREDICTED: uncharacterized protein LOC101202748 [Cucumis sativus] >gi|700203698|gb|KGN58831.1| hypothetical protein Csa_3G733360 [Cucumis sativus]	AT2G37860.3 | Symbols: LCD1 | Protein of unknown function (DUF3411) | chr2:15856952-15858793 FORWARD LENGTH=432	sp|B9DFK5|RETIC_ARATH Protein RETICULATA, chloroplastic OS=Arabidopsis thaliana GN=RE PE=1 SV=1	0.00910563
BhiUN1463G1	red	Contig1463	IPR008949 Isoprenoid synthase domain; IPR008930 Terpenoid cyclases/protein prenyltransferase alpha-alpha toroid; IPR001906 Terpene synthase, N-terminal domain	-	gi|661902982|ref|NP_001284382.1| (+)-gamma-cadinene synthase [Cucumis melo] >gi|410591629|sp|B2KSJ5|GCSY1_CUCME RecName: Full=(+)-gamma-cadinene synthase; Short=CmTpsNY; AltName: Full=(+)-delta-cadinene synthase >gi|162285971|gb|ABX83200.1| terpene synthase [Cucumis melo]	AT5G23960.1 | Symbols: ATTPS21, TPS21 | terpene synthase 21 | chr5:8092969-8095128 FORWARD LENGTH=547	sp|B2KSJ5|GCSY1_CUCME (+)-gamma-cadinene synthase OS=Cucumis melo PE=1 SV=1	0.0090528
Bhi07G000257	turquoise	chr7	IPR023828 Peptidase S8, subtilisin, Ser-active site; IPR015500 Peptidase S8, subtilisin-related; IPR003137 PA domain; IPR000209 Peptidase S8/S53 domain; IPR010259 Peptidase S8 propeptide/proteinase inhibitor I9	-	gi|659109540|ref|XP_008454762.1| PREDICTED: subtilisin-like protease SBT1.1 [Cucumis melo] >gi|1035412216|ref|XP_016901624.1| PREDICTED: subtilisin-like protease SBT1.1 [Cucumis melo]	AT1G01900.1 | Symbols: ATSBT1.1, SBTI1.1 | subtilase family protein | chr1:310332-313011 FORWARD LENGTH=774	sp|Q84WS0|SBT11_ARATH Subtilisin-like protease SBT1.1 OS=Arabidopsis thaliana GN=SBTI1.1 PE=1 SV=1	0.00904445
Bhi04G000811	turquoise	chr4	IPR008979 Galactose-binding domain-like; IPR006946 Domain of unknown function DUF642	-	gi|449441934|ref|XP_004138737.1| PREDICTED: uncharacterized protein LOC101219952 [Cucumis sativus] >gi|700207800|gb|KGN62919.1| hypothetical protein Csa_2G379990 [Cucumis sativus]	AT5G11420.1 | Symbols: | Protein of unknown function, DUF642 | chr5:3644655-3646991 FORWARD LENGTH=366	-	0.00887743
Bhi10G000502	green	chr10	-	-	-	-	-	0.00883605
Bhi01G000893	green	chr1	IPR006379 HAD-superfamily hydrolase, subfamily IIB; IPR003337 Trehalose-phosphatase; IPR023214 HAD-like domain	-	gi|659077216|ref|XP_008439088.1| PREDICTED: trehalose-phosphate phosphatase A [Cucumis melo] >gi|659077218|ref|XP_008439089.1| PREDICTED: trehalose-phosphate phosphatase A [Cucumis melo] >gi|659077220|ref|XP_008439090.1| PREDICTED: trehalose-phosphate phosphatase A [Cucumis melo]	AT5G51460.2 | Symbols: ATTPPA | Haloacid dehalogenase-like hydrolase (HAD) superfamily protein | chr5:20902266-20904292 FORWARD LENGTH=384	sp|O64896|TPPA_ARATH Trehalose-phosphate phosphatase A OS=Arabidopsis thaliana GN=TPPA PE=1 SV=1	0.00873126
Bhi12G001171	yellow	chr12	IPR009410 Allene oxide cyclase	GO:0009507 chloroplast; GO:0016853 isomerase activity;	gi|449445152|ref|XP_004140337.1| PREDICTED: allene oxide cyclase 3, chloroplastic [Cucumis sativus] >gi|700195775|gb|KGN50952.1| Allene oxide cyclase [Cucumis sativus]	AT3G25780.1 | Symbols: AOC3 | allene oxide cyclase 3 | chr3:9409362-9410409 FORWARD LENGTH=258	sp|Q9LS01|AOC3_ARATH Allene oxide cyclase 3, chloroplastic OS=Arabidopsis thaliana GN=AOC3 PE=2 SV=1	0.00831916
Bhi11G000912	yellow	chr11	IPR000217 Tubulin; IPR018316 Tubulin/FtsZ, 2-layer sandwich domain; IPR008280 Tubulin/FtsZ, C-terminal; IPR003008 Tubulin/FtsZ, GTPase domain; IPR002452 Alpha tubulin; IPR017975 Tubulin, conserved site; IPR023123 Tubulin, C-terminal	GO:0005874 microtubule; GO:0007017 microtubule-based process;	gi|449465103|ref|XP_004150268.1| PREDICTED: tubulin alpha chain isoform X1 [Cucumis sativus] >gi|659108853|ref|XP_008454421.1| PREDICTED: tubulin alpha chain [Cucumis melo] >gi|307135957|gb|ADN33817.1| tubulin alpha chain [Cucumis melo subsp. melo] >gi|700197579|gb|KGN52737.1| Tubulin alpha chain [Cucumis sativus]	AT4G14960.2 | Symbols: TUA6 | Tubulin/FtsZ family protein | chr4:8548769-8550319 REVERSE LENGTH=450	sp|P33629|TBA_PRUDU Tubulin alpha chain OS=Prunus dulcis GN=TUBA PE=2 SV=1	0.00831329
Bhi01G002348	blue	chr1	IPR004963 Pectinacetylesterase/NOTUM	GO:0016787 hydrolase activity;	gi|659101921|ref|XP_008451860.1| PREDICTED: pectin acetylesterase 8-like isoform X1 [Cucumis melo]	AT4G19420.1 | Symbols: | Pectinacetylesterase family protein | chr4:10587504-10589807 REVERSE LENGTH=397	sp|Q6DBP4|PAE8_ARATH Pectin acetylesterase 8 OS=Arabidopsis thaliana GN=PAE8 PE=2 SV=1	0.00819564
Bhi05G000714	blue	chr5	-	-	-	-	-	0.00819025
Bhi06G001143	yellow	chr6	IPR000172 Glucose-methanol-choline oxidoreductase, N-terminal; IPR023753 FAD/NAD(P)-binding domain; IPR007867 Glucose-methanol-choline oxidoreductase, C-terminal	GO:0016614 oxidoreductase activity, acting on CH-OH group of donors; GO:0050660 flavin adenine dinucleotide binding; GO:0055114 oxidation-reduction process;	gi|778667418|ref|XP_011648924.1| PREDICTED: (R)-mandelonitrile lyase 1-like [Cucumis sativus] >gi|700206002|gb|KGN61121.1| hypothetical protein Csa_2G057070 [Cucumis sativus]	AT1G73050.1 | Symbols: | Glucose-methanol-choline (GMC) oxidoreductase family protein | chr1:27476565-27478534 REVERSE LENGTH=552	sp|P52706|MDL1_PRUSE (R)-mandelonitrile lyase 1 OS=Prunus serotina GN=MDL1 PE=1 SV=1	0.00818914
Bhi08G001680	turquoise	chr8	IPR010399 Tify domain; IPR018467 CO/COL/TOC1, conserved site	-	gi|778660933|ref|XP_011657199.1| PREDICTED: protein TIFY 5A-like [Cucumis sativus] >gi|700210431|gb|KGN65527.1| hypothetical protein Csa_1G435720 [Cucumis sativus]	AT1G30135.1 | Symbols: JAZ8, TIFY5A | jasmonate-zim-domain protein 8 | chr1:10596516-10597095 FORWARD LENGTH=131	sp|Q8LBM2|TIF5A_ARATH Protein TIFY 5A OS=Arabidopsis thaliana GN=TIFY5A PE=1 SV=1	0.00805089
Bhi02G001111	green	chr2	-	-	-	-	-	0.00792277
Bhi04G000504	turquoise	chr4	IPR017053 Response regulator B-type, plant; IPR009057 Homeodomain-like; IPR001789 Signal transduction response regulator, receiver domain; IPR001005 SANT/Myb domain; IPR006447 Myb domain, plants; IPR011006 CheY-like superfamily	GO:0003677 DNA binding; GO:0003700 transcription factor activity, sequence-specific DNA binding; GO:0007165 signal transduction;	gi|659087352|ref|XP_008444405.1| PREDICTED: two-component response regulator ARR11 [Cucumis melo]	AT1G67710.1 | Symbols: ARR11 | response regulator 11 | chr1:25376994-25378905 REVERSE LENGTH=521	sp|Q5N6V8|ORR26_ORYSJ Two-component response regulator ORR26 OS=Oryza sativa subsp. japonica GN=RR26 PE=3 SV=2	0.0079089
Bhi10G000285	black	chr10	IPR001480 Bulb-type lectin domain; IPR011009 Protein kinase-like domain; IPR000719 Protein kinase domain; IPR002290 Serine/threonine/dual specificity protein kinase, catalytic domain; IPR024171 S-receptor-like serine/threonine-protein kinase; IPR017441 Protein kinase, ATP binding site; IPR013320 Concanavalin A-like lectin/glucanase domain	-	gi|778693113|ref|XP_011653580.1| PREDICTED: G-type lectin S-receptor-like serine/threonine-protein kinase RLK1 [Cucumis sativus]	AT5G60900.1 | Symbols: RLK1 | receptor-like protein kinase 1 | chr5:24498467-24501494 REVERSE LENGTH=748	sp|Q0JEU6|LERK3_ORYSJ G-type lectin S-receptor-like serine/threonine-protein kinase LECRK3 OS=Oryza sativa subsp. japonica GN=LECRK3 PE=3 SV=2	0.0078507
BhiUN179G5	blue	Contig179	IPR008480 Protein of unknown function DUF761, plant	-	gi|700200554|gb|KGN55687.1| hypothetical protein Csa_3G004530 [Cucumis sativus]	AT5G57510.1 | Symbols: | unknown protein; Has 27 Blast hits to 27 proteins in 9 species: Archae - 0; Bacteria - 0; Metazoa - 0; Fungi - 0; Plants - 27; Viruses - 0; Other Eukaryotes - 0 (source: NCBI BLink). | chr5:23289164-23289556 REVERSE LENGTH=130	-	0.00774263
BhiUN716G2	brown	Contig716	IPR008930 Terpenoid cyclases/protein prenyltransferase alpha-alpha toroid; IPR001906 Terpene synthase, N-terminal domain; IPR008949 Isoprenoid synthase domain; IPR005630 Terpene synthase, metal-binding domain	-	gi|778688338|ref|XP_004151461.2| PREDICTED: (-)-germacrene D synthase-like [Cucumis sativus]	AT5G23960.2 | Symbols: TPS21 | terpene synthase 21 | chr5:8092969-8095128 FORWARD LENGTH=545	sp|Q6Q3H3|TPSGD_VITVI (-)-germacrene D synthase OS=Vitis vinifera GN=VIT_19s0014g04930 PE=1 SV=1	0.00770109
Bhi07G001301	turquoise	chr7	IPR032675 Leucine-rich repeat domain, L domain-like; IPR000719 Protein kinase domain; IPR001245 Serine-threonine/tyrosine-protein kinase catalytic domain; IPR013320 Concanavalin A-like lectin/glucanase domain; IPR011009 Protein kinase-like domain	-	gi|449434813|ref|XP_004135190.1| PREDICTED: probable LRR receptor-like serine/threonine-protein kinase At1g14390 [Cucumis sativus] >gi|700196717|gb|KGN51894.1| hypothetical protein Csa_5G604390 [Cucumis sativus]	AT1G14390.1 | Symbols: | Leucine-rich repeat protein kinase family protein | chr1:4924277-4926794 FORWARD LENGTH=747	sp|Q9M9S4|Y1143_ARATH Probable LRR receptor-like serine/threonine-protein kinase At1g14390 OS=Arabidopsis thaliana GN=At1g14390 PE=2 SV=1	0.00749478
Bhi09G001448	turquoise	chr9	IPR010493 Serine acetyltransferase, N-terminal; IPR001451 Hexapeptide repeat; IPR018357 Hexapeptide transferase, conserved site; IPR011004 Trimeric LpxA-like; IPR005881 Serine O-acetyltransferase	GO:0005737 cytoplasm; GO:0006535 cysteine biosynthetic process from serine; GO:0009001 serine O-acetyltransferase activity;	gi|659126005|ref|XP_008462963.1| PREDICTED: serine acetyltransferase 1, chloroplastic [Cucumis melo]	AT3G13110.1 | Symbols: ATSERAT2;2, SAT-1, SAT-A, SAT3, SAT-M, SERAT2;2 | serine acetyltransferase 2;2 | chr3:4214939-4216114 REVERSE LENGTH=391	sp|Q39218|SAT3_ARATH Serine acetyltransferase 3, mitochondrial OS=Arabidopsis thaliana GN=SAT3 PE=1 SV=3	0.00747458
Bhi03G001809	turquoise	chr3	IPR001280 Photosystem I PsaA/PsaB	GO:0009522 photosystem I; GO:0009579 thylakoid; GO:0015979 photosynthesis; GO:0016021 integral component of membrane;	gi|1226527257|gb|ASP44493.1| photosystem I P700 chlorophyll a apoprotein A1 (chloroplast) [Citrullus colocynthis]	ATCG00350.1 | Symbols: PSAA | Photosystem I, PsaA/PsaB protein | chrC:39605-41857 REVERSE LENGTH=750	sp|Q2QD89|PSAA_CUCSA Photosystem I P700 chlorophyll a apoprotein A1 OS=Cucumis sativus GN=psaA PE=3 SV=1	0.00738033
BhiUN954G8	blue	Contig954	-	-	gi|778667500|ref|XP_011648935.1| PREDICTED: uncharacterized protein At4g30180 [Cucumis sativus] >gi|700206035|gb|KGN61154.1| hypothetical protein Csa_2G060350 [Cucumis sativus]	AT2G18969.1 | Symbols: | BEST Arabidopsis thaliana protein match is: sequence-specific DNA binding transcription factors;transcription regulators (TAIR:AT4G30180.1); Has 30201 Blast hits to 17322 proteins in 780 species: Archae - 12; Bacteria - 1396; Metazoa - 17338; Fungi - 3422; Plants - 5037; Viruses - 0; Other Eukaryotes - 2996 (source: NCBI BLink). | chr2:8229047-8229574 REVERSE LENGTH=175	sp|Q9SUM5|Y4318_ARATH Uncharacterized protein At4g30180 OS=Arabidopsis thaliana GN=At4g30180 PE=2 SV=1	0.00734647
Bhi01G000380	blue	chr1	IPR003959 ATPase, AAA-type, core; IPR027417 P-loop containing nucleoside triphosphate hydrolase; IPR003593 AAA+ ATPase domain; IPR025753 AAA-type ATPase, N-terminal domain	GO:0005524 ATP binding;	gi|449432020|ref|XP_004133798.1| PREDICTED: ATP-dependent zinc metalloprotease FTSH 11, chloroplastic/mitochondrial [Cucumis sativus] >gi|700201266|gb|KGN56399.1| hypothetical protein Csa_3G119330 [Cucumis sativus]	AT2G46620.1 | Symbols: | P-loop containing nucleoside triphosphate hydrolases superfamily protein | chr2:19139071-19140546 REVERSE LENGTH=491	sp|F4IJ77|AATP4_ARATH AAA-ATPase At2g46620 OS=Arabidopsis thaliana GN=At2g46620 PE=2 SV=1	0.00729982
Bhi10G000226	turquoise	chr10	IPR011992 EF-hand domain pair; IPR018247 EF-Hand 1, calcium-binding site; IPR011009 Protein kinase-like domain; IPR002290 Serine/threonine/dual specificity protein kinase, catalytic domain; IPR002048 EF-hand domain; IPR017441 Protein kinase, ATP binding site; IPR000719 Protein kinase domain; IPR008271 Serine/threonine-protein kinase, active site	-	gi|778717031|ref|XP_011657639.1| PREDICTED: calcium-dependent protein kinase 8-like [Cucumis sativus] >gi|700192924|gb|KGN48128.1| hypothetical protein Csa_6G439940 [Cucumis sativus]	AT5G19450.2 | Symbols: CDPK19, CPK8 | calcium-dependent protein kinase 19 | chr5:6558672-6561471 REVERSE LENGTH=533	sp|Q42438|CDPK8_ARATH Calcium-dependent protein kinase 8 OS=Arabidopsis thaliana GN=CPK8 PE=1 SV=1	0.00729873
Bhi01G002524	green	chr1	-	-	-	-	-	0.0069756
Bhi10G001065	turquoise	chr10	IPR012336 Thioredoxin-like fold; IPR002109 Glutaredoxin; IPR011905 Glutaredoxin-like, plant II	-	gi|659111862|ref|XP_008455946.1| PREDICTED: glutaredoxin-C9-like [Cucumis melo]	AT1G28480.1 | Symbols: GRX480, roxy19 | Thioredoxin superfamily protein | chr1:10013634-10014047 REVERSE LENGTH=137	sp|Q9SGP6|GRXC9_ARATH Glutaredoxin-C9 OS=Arabidopsis thaliana GN=GRXC9 PE=1 SV=1	0.00680639
Bhi05G001593	black	chr5	IPR001932 PPM-type phosphatase domain; IPR015655 Protein phosphatase 2C family	GO:0003824 catalytic activity;	gi|1035412786|ref|XP_016901723.1| PREDICTED: probable protein phosphatase 2C 52 isoform X1 [Cucumis melo]	AT4G03415.2 | Symbols: | Protein phosphatase 2C family protein | chr4:1503789-1505510 REVERSE LENGTH=468	sp|Q8GY60|P2C52_ARATH Probable protein phosphatase 2C 52 OS=Arabidopsis thaliana GN=At4g03415 PE=2 SV=1	0.00680218
Bhi08G001690	turquoise	chr8	IPR018467 CO/COL/TOC1, conserved site	-	gi|659068433|ref|XP_008444384.1| PREDICTED: protein TIFY 5A-like [Cucumis melo]	AT1G30135.1 | Symbols: JAZ8, TIFY5A | jasmonate-zim-domain protein 8 | chr1:10596516-10597095 FORWARD LENGTH=131	sp|Q8LBM2|TIF5A_ARATH Protein TIFY 5A OS=Arabidopsis thaliana GN=TIFY5A PE=1 SV=1	0.0066471
Bhi01G002154	green	chr1	-	-	gi|700197888|gb|KGN53046.1| hypothetical protein Csa_4G012420 [Cucumis sativus]	-	-	0.00646834
Bhi08G001396	blue	chr8	-	-	gi|700209288|gb|KGN64384.1| hypothetical protein Csa_1G050230 [Cucumis sativus]	AT5G50335.1 | Symbols: | unknown protein; Has 30201 Blast hits to 17322 proteins in 780 species: Archae - 12; Bacteria - 1396; Metazoa - 17338; Fungi - 3422; Plants - 5037; Viruses - 0; Other Eukaryotes - 2996 (source: NCBI BLink). | chr5:20489391-20489615 REVERSE LENGTH=74	-	0.00645433
Bhi01G001789	yellow	chr1	IPR015422 Pyridoxal phosphate-dependent transferase, major region, subdomain 2; IPR015424 Pyridoxal phosphate-dependent transferase; IPR004839 Aminotransferase, class I/classII; IPR004838 Aminotransferases, class-I, pyridoxal-phosphate-binding site	GO:0003824 catalytic activity; GO:0003904 deoxyribodipyrimidine photo-lyase activity;	gi|186920080|gb|ABO76785.1| 1-aminocyclopropane-1-carboxylate synthase [Citrullus colocynthis x Citrullus lanatus var. lanatus]	AT3G61510.1 | Symbols: ACS1, AT-ACS1 | ACC synthase 1 | chr3:22763495-22765730 REVERSE LENGTH=488	sp|P31531|1A1C_SOYBN 1-aminocyclopropane-1-carboxylate synthase OS=Glycine max GN=ACS1 PE=2 SV=1	0.00631753
Bhi06G001729	green	chr6	-	-	-	-	-	0.0062622
Bhi11G001004	green	chr11	IPR001650 Helicase, C-terminal; IPR000571 Zinc finger, CCCH-type; IPR027417 P-loop containing nucleoside triphosphate hydrolase; IPR011545 DEAD/DEAH box helicase domain; IPR014001 Helicase superfamily 1/2, ATP-binding domain	-	gi|659108703|ref|XP_008454344.1| PREDICTED: DExH-box ATP-dependent RNA helicase DExH8 isoform X1 [Cucumis melo]	AT2G47680.1 | Symbols: | zinc finger (CCCH type) helicase family protein | chr2:19545828-19550871 REVERSE LENGTH=1015	sp|O22243|C3H31_ARATH DExH-box ATP-dependent RNA helicase DExH8 OS=Arabidopsis thaliana GN=At2g47680 PE=2 SV=2	0.00607607
Bhi09G000262	brown	chr9	IPR001024 PLAT/LH2 domain; IPR013819 Lipoxygenase, C-terminal; IPR000907 Lipoxygenase; IPR020833 Lipoxygenase, iron binding site; IPR027433 Lipoxygenase, domain 3; IPR001246 Lipoxygenase, plant; IPR020834 Lipoxygenase, conserved site	GO:0005515 protein binding;	gi|659124688|ref|XP_008462295.1| PREDICTED: linoleate 13S-lipoxygenase 3-1, chloroplastic [Cucumis melo]	AT1G17420.1 | Symbols: LOX3 | lipoxygenase 3 | chr1:5977512-5981384 FORWARD LENGTH=919	sp|O24371|LOX31_SOLTU Linoleate 13S-lipoxygenase 3-1, chloroplastic OS=Solanum tuberosum GN=LOX3.1 PE=1 SV=1	0.00604951
Bhi10G000068	green	chr10	IPR029044 Nucleotide-diphospho-sugar transferases	-	gi|659117493|ref|XP_008458630.1| PREDICTED: glucomannan 4-beta-mannosyltransferase 2 [Cucumis melo]	AT5G22740.1 | Symbols: ATCSLA02, CSLA02, ATCSLA2, CSLA2 | cellulose synthase-like A02 | chr5:7555379-7559866 REVERSE LENGTH=534	sp|Q9FNI7|CSLA2_ARATH Glucomannan 4-beta-mannosyltransferase 2 OS=Arabidopsis thaliana GN=CSLA2 PE=2 SV=1	0.00594915
Bhi06G001153	blue	chr6	IPR001998 Xylose isomerase; IPR013022 Xylose isomerase-like, TIM barrel domain; IPR013452 Xylose isomerase, bacterial-type	GO:0005975 carbohydrate metabolic process; GO:0009045 xylose isomerase activity;	gi|659069848|ref|XP_008452100.1| PREDICTED: xylose isomerase [Cucumis melo] >gi|659069850|ref|XP_008452108.1| PREDICTED: xylose isomerase [Cucumis melo]	AT5G57655.2 | Symbols: | xylose isomerase family protein | chr5:23347030-23349805 FORWARD LENGTH=477	sp|Q9FKK7|XYLA_ARATH Xylose isomerase OS=Arabidopsis thaliana GN=XYLA PE=2 SV=2	0.00591851
Bhi11G000033	red	chr11	IPR003106 Leucine zipper, homeobox-associated; IPR009057 Homeodomain-like; IPR001356 Homeobox domain; IPR017970 Homeobox, conserved site; IPR000047 Helix-turn-helix motif; IPR006712 HD-ZIP protein, N-terminal	GO:0003700 transcription factor activity, sequence-specific DNA binding; GO:0006355 regulation of transcription, DNA-templated; GO:0043565 sequence-specific DNA binding;	gi|1035405203|ref|XP_008448815.2| PREDICTED: homeobox-leucine zipper protein HAT4 [Cucumis melo]	AT4G16780.1 | Symbols: ATHB-2, HAT4, ATHB2, HB-2 | homeobox protein 2 | chr4:9449291-9450604 FORWARD LENGTH=284	sp|Q05466|HAT4_ARATH Homeobox-leucine zipper protein HAT4 OS=Arabidopsis thaliana GN=HAT4 PE=1 SV=1	0.0058956
Bhi04G001106	yellow	chr4	-	-	gi|449469787|ref|XP_004152600.1| PREDICTED: uncharacterized protein LOC101213956 [Cucumis sativus] >gi|778671826|ref|XP_011649692.1| PREDICTED: uncharacterized protein LOC101213956 [Cucumis sativus]	AT4G38060.2 | Symbols: | unknown protein; BEST Arabidopsis thaliana protein match is: unknown protein (TAIR:AT5G65480.1); Has 35333 Blast hits to 34131 proteins in 2444 species: Archae - 798; Bacteria - 22429; Metazoa - 974; Fungi - 991; Plants - 531; Viruses - 0; Other Eukaryotes - 9610 (source: NCBI BLink). | chr4:17873709-17874379 REVERSE LENGTH=136	-	0.0058775
Bhi02G000615	turquoise	chr2	IPR010402 CCT domain; IPR000315 B-box-type zinc finger	GO:0005515 protein binding;	gi|778660656|ref|XP_011656660.1| PREDICTED: zinc finger protein CONSTANS-LIKE 5-like isoform X2 [Cucumis sativus] >gi|700210322|gb|KGN65418.1| Zinc finger protein [Cucumis sativus]	AT5G57660.1 | Symbols: ATCOL5, COL5 | CONSTANS-like 5 | chr5:23355573-23356729 FORWARD LENGTH=355	sp|Q9FHH8|COL5_ARATH Zinc finger protein CONSTANS-LIKE 5 OS=Arabidopsis thaliana GN=COL5 PE=2 SV=2	0.00580029
Bhi10G001433	yellow	chr10	-	-	gi|700206832|gb|KGN61951.1| hypothetical protein Csa_2G271440 [Cucumis sativus]	-	-	0.00579344
Bhi08G000320	brown	chr8	IPR000719 Protein kinase domain; IPR003527 Mitogen-activated protein (MAP) kinase, conserved site; IPR011009 Protein kinase-like domain; IPR002290 Serine/threonine/dual specificity protein kinase, catalytic domain; IPR008271 Serine/threonine-protein kinase, active site; IPR017441 Protein kinase, ATP binding site	GO:0004672 protein kinase activity; GO:0005524 ATP binding; GO:0006468 protein phosphorylation;	gi|525507230|ref|NP_001267653.1| mitogen-activated protein kinase 3-like [Cucumis sativus] >gi|71980112|gb|AAZ57337.1| Trichoderma-induced protein kinase [Cucumis sativus] >gi|110748608|gb|ABG89857.1| NO3-stress-induced mitogen activated protein kinase [Cucumis sativus] >gi|700210561|gb|KGN65657.1| hypothetical protein Csa_1G479630 [Cucumis sativus]	AT3G45640.1 | Symbols: ATMPK3, MPK3, ATMAPK3 | mitogen-activated protein kinase 3 | chr3:16756918-16758476 FORWARD LENGTH=370	sp|Q39023|MPK3_ARATH Mitogen-activated protein kinase 3 OS=Arabidopsis thaliana GN=MPK3 PE=1 SV=2	0.00576559
Bhi05G001081	yellow	chr5	IPR024489 Organ specific protein	-	gi|778726203|ref|XP_004151481.2| PREDICTED: uncharacterized protein LOC101212185 [Cucumis sativus] >gi|700189106|gb|KGN44339.1| hypothetical protein Csa_7G259390 [Cucumis sativus]	-	sp|P17772|OSS2_PEA Organ-specific protein S2 OS=Pisum sativum PE=2 SV=1	0.00572987
Bhi06G000810	yellow	chr6	IPR001810 F-box domain; IPR025886 Phloem protein 2-like	GO:0005515 protein binding;	gi|449442263|ref|XP_004138901.1| PREDICTED: F-box protein PP2-B10 [Cucumis sativus] >gi|700206231|gb|KGN61350.1| hypothetical protein Csa_2G094900 [Cucumis sativus]	AT2G02240.1 | Symbols: MEE66 | F-box family protein | chr2:592359-593602 REVERSE LENGTH=320	sp|Q3E6P4|FB95_ARATH F-box protein At2g02240 OS=Arabidopsis thaliana GN=At2g02240 PE=2 SV=1	0.00568232
Bhi02G001302	blue	chr2	IPR028919 Viral movement protein	-	gi|700211397|gb|KGN66493.1| hypothetical protein Csa_1G614140 [Cucumis sativus]	-	-	0.00562349
Bhi03G001736	green	chr3	IPR009798 Wound-induced protein, Wun1; IPR032710 NTF2-like domain	-	gi|659128534|ref|XP_008464249.1| PREDICTED: wound-induced protein 1 [Cucumis melo]	AT5G01740.1 | Symbols: | Nuclear transport factor 2 (NTF2) family protein | chr5:280793-281281 FORWARD LENGTH=162	sp|P20144|WUN1_SOLTU Wound-induced protein 1 OS=Solanum tuberosum GN=WUN1 PE=2 SV=1	0.00553901
Bhi09G002525	black	chr9	IPR011009 Protein kinase-like domain; IPR013320 Concanavalin A-like lectin/glucanase domain; IPR000719 Protein kinase domain	-	gi|449447361|ref|XP_004141437.1| PREDICTED: putative receptor-like protein kinase At1g72540 [Cucumis sativus] >gi|700200227|gb|KGN55385.1| hypothetical protein Csa_4G648560 [Cucumis sativus]	AT2G05940.1 | Symbols: | Protein kinase superfamily protein | chr2:2287514-2289270 REVERSE LENGTH=462	sp|Q9CAH1|Y1725_ARATH Putative receptor-like protein kinase At1g72540 OS=Arabidopsis thaliana GN=At1g72540 PE=2 SV=1	0.00544164
Bhi03G000795	blue	chr3	IPR001757 P-type ATPase; IPR008250 P-type ATPase, A domain; IPR004014 Cation-transporting P-type ATPase, N-terminal; IPR023298 P-type ATPase, transmembrane domain; IPR023214 HAD-like domain; IPR006068 Cation-transporting P-type ATPase, C-terminal; IPR006408 P-type ATPase, subfamily IIB; IPR023299 P-type ATPase, cytoplasmic domain N; IPR018303 P-type ATPase, phosphorylation site	GO:0016021 integral component of membrane;	gi|659079703|ref|XP_008440397.1| PREDICTED: calcium-transporting ATPase 2, plasma membrane-type isoform X2 [Cucumis melo]	AT4G37640.1 | Symbols: ACA2 | calcium ATPase 2 | chr4:17683225-17686808 REVERSE LENGTH=1014	sp|O81108|ACA2_ARATH Calcium-transporting ATPase 2, plasma membrane-type OS=Arabidopsis thaliana GN=ACA2 PE=1 SV=1	0.0052626
Bhi01G000462	turquoise	chr1	-	-	-	-	-	0.00510909
Bhi05G000383	turquoise	chr5	-	-	gi|659132004|ref|XP_008465964.1| PREDICTED: uncharacterized protein LOC103503536 [Cucumis melo]	AT2G35290.1 | Symbols: | unknown protein; Has 39 Blast hits to 39 proteins in 10 species: Archae - 0; Bacteria - 0; Metazoa - 0; Fungi - 0; Plants - 39; Viruses - 0; Other Eukaryotes - 0 (source: NCBI BLink). | chr2:14861635-14862000 REVERSE LENGTH=121	-	0.0050224
BhiUN579G17	blue	Contig579	IPR011771 Magnesium-chelatase, subunit H; IPR003672 CobN/magnesium chelatase; IPR022571 Magnesium chelatase, subunit H, N-terminal	GO:0015995 chlorophyll biosynthetic process; GO:0016851 magnesium chelatase activity;	gi|659121673|ref|XP_008460769.1| PREDICTED: magnesium-chelatase subunit ChlH, chloroplastic [Cucumis melo]	AT5G13630.1 | Symbols: GUN5, CCH, CHLH, CCH1, ABAR | magnesium-chelatase subunit chlH, chloroplast, putative / Mg-protoporphyrin IX chelatase, putative (CHLH) | chr5:4387567-4392082 REVERSE LENGTH=1381	sp|Q9FNB0|CHLH_ARATH Magnesium-chelatase subunit ChlH, chloroplastic OS=Arabidopsis thaliana GN=CHLH PE=1 SV=1	0.00499223
Bhi11G002342	black	chr11	IPR000109 Proton-dependent oligopeptide transporter family; IPR020846 Major facilitator superfamily domain	GO:0005215 transporter activity; GO:0006810 transport; GO:0016020 membrane;	gi|525507013|ref|NP_001267552.1| probable nitrite transporter At1g68570-like [Cucumis sativus] >gi|778674485|ref|XP_011650229.1| PREDICTED: probable nitrite transporter At1g68570-like isoform X1 [Cucumis sativus] >gi|15391731|emb|CAA93316.2| nitrite transporter [Cucumis sativus] >gi|700204283|gb|KGN59416.1| hypothetical protein Csa_3G818250 [Cucumis sativus]	AT1G68570.1 | Symbols: | Major facilitator superfamily protein | chr1:25746811-25750110 FORWARD LENGTH=596	sp|Q9SX20|PTR18_ARATH Protein NRT1/ PTR FAMILY 3.1 OS=Arabidopsis thaliana GN=NPF3.1 PE=2 SV=1	0.00496888
Bhi09G002317	blue	chr9	-	-	gi|700200393|gb|KGN55551.1| hypothetical protein Csa_4G664580 [Cucumis sativus]	AT1G20970.1 | Symbols: | FUNCTIONS IN: molecular_function unknown; INVOLVED IN: biological_process unknown; LOCATED IN: plasma membrane, vacuole; EXPRESSED IN: guard cell, cultured cell; BEST Arabidopsis thaliana protein match is: proton pump interactor 1 (TAIR:AT4G27500.1); Has 30201 Blast hits to 17322 proteins in 780 species: Archae - 12; Bacteria - 1396; Metazoa - 17338; Fungi - 3422; Plants …	sp|O23144|PPI1_ARATH Proton pump-interactor 1 OS=Arabidopsis thaliana GN=PPI1 PE=1 SV=2	0.00491293
Bhi09G001999	red	chr9	IPR013320 Concanavalin A-like lectin/glucanase domain; IPR011009 Protein kinase-like domain; IPR017441 Protein kinase, ATP binding site; IPR001245 Serine-threonine/tyrosine-protein kinase catalytic domain; IPR000719 Protein kinase domain	-	gi|659132660|ref|XP_008466316.1| PREDICTED: rust resistance kinase Lr10-like [Cucumis melo]	AT4G32300.1 | Symbols: SD2-5 | S-domain-2 5 | chr4:15599970-15602435 FORWARD LENGTH=821	sp|P93604|LRK10_WHEAT Rust resistance kinase Lr10 OS=Triticum aestivum GN=LRK10 PE=2 SV=1	0.00471792
Bhi01G000330	yellow	chr1	IPR002213 UDP-glucuronosyl/UDP-glucosyltransferase	GO:0008152 metabolic process; GO:0016758 transferase activity, transferring hexosyl groups;	gi|449432066|ref|XP_004133821.1| PREDICTED: hydroquinone glucosyltransferase-like [Cucumis sativus] >gi|700201310|gb|KGN56443.1| UDP-glucose:glucosyltransferase [Cucumis sativus]	AT4G01070.1 | Symbols: GT72B1, UGT72B1 | UDP-Glycosyltransferase superfamily protein | chr4:461858-463300 REVERSE LENGTH=480	sp|Q9AR73|HQGT_RAUSE Hydroquinone glucosyltransferase OS=Rauvolfia serpentina GN=AS PE=1 SV=1	0.00471478
Bhi11G002000	green	chr11	IPR004864 Late embryogenesis abundant protein, LEA-14	-	gi|778684445|ref|XP_011652030.1| PREDICTED: protein YLS9-like [Cucumis sativus] >gi|700204061|gb|KGN59194.1| hypothetical protein Csa_3G778990 [Cucumis sativus]	AT5G06320.1 | Symbols: NHL3 | NDR1/HIN1-like 3 | chr5:1931016-1931711 REVERSE LENGTH=231	sp|Q9FNH6|NHL3_ARATH NDR1/HIN1-Like protein 3 OS=Arabidopsis thaliana GN=NHL3 PE=1 SV=1	0.00469571
Bhi02G000488	green	chr2	IPR003594 Histidine kinase-like ATPase, C-terminal domain	-	gi|659128824|ref|XP_008464388.1| PREDICTED: uncharacterized protein LOC103502291 [Cucumis melo]	AT3G48770.1 | Symbols: | DNA binding;ATP binding | chr3:18079261-18086817 REVERSE LENGTH=1899	-	0.00467103
Bhi06G000168	green	chr6	IPR000719 Protein kinase domain; IPR013320 Concanavalin A-like lectin/glucanase domain; IPR001220 Legume lectin domain; IPR002290 Serine/threonine/dual specificity protein kinase, catalytic domain; IPR019825 Legume lectin, beta chain, Mn/Ca-binding site; IPR011009 Protein kinase-like domain; IPR008271 Serine/threonine-protein kinase, active site; IPR017441 Protein kinase, ATP binding site	GO:0004672 protein kinase activity; GO:0005524 ATP binding; GO:0006468 protein phosphorylation;	gi|51477397|gb|AAU04770.1| receptor lectin protein kinase-like [Cucumis melo]	AT3G08870.1 | Symbols: | Concanavalin A-like lectin protein kinase family protein | chr3:2700500-2702581 REVERSE LENGTH=693	sp|Q9SR87|LRK61_ARATH Probable L-type lectin-domain containing receptor kinase VI.1 OS=Arabidopsis thaliana GN=LECRK61 PE=2 SV=1	0.00453856
Bhi01G001667	black	chr1	-	-	gi|700198640|gb|KGN53798.1| hypothetical protein Csa_4G130630 [Cucumis sativus]	-	-	0.00452908
Bhi10G000559	blue	chr10	-	-	gi|659128293|ref|XP_008464139.1| PREDICTED: uncharacterized protein At3g17950-like [Cucumis melo]	AT5G02440.1 | Symbols: | unknown protein; Has 71 Blast hits to 71 proteins in 12 species: Archae - 0; Bacteria - 0; Metazoa - 0; Fungi - 0; Plants - 71; Viruses - 0; Other Eukaryotes - 0 (source: NCBI BLink). | chr5:531066-532725 FORWARD LENGTH=176	sp|Q6DR24|Y3795_ARATH Uncharacterized protein At3g17950 OS=Arabidopsis thaliana GN=Y-3 PE=1 SV=1	0.00450928
Bhi12G000722	blue	chr12	-	-	-	-	-	0.00440239
Bhi01G002842	turquoise	chr1	IPR004263 Exostosin-like	-	gi|778689735|ref|XP_011653008.1| PREDICTED: probable beta-1,4-xylosyltransferase IRX10 [Cucumis sativus] >gi|700197803|gb|KGN52961.1| hypothetical protein Csa_4G007660 [Cucumis sativus]	AT1G27440.1 | Symbols: GUT2, IRX10, ATGUT1 | Exostosin family protein | chr1:9529265-9531213 REVERSE LENGTH=412	sp|Q9FZJ1|IRX10_ARATH Probable beta-1,4-xylosyltransferase IRX10 OS=Arabidopsis thaliana GN=IRX10 PE=2 SV=1	0.00430215
Bhi05G001769	black	chr5	-	-	gi|449444983|ref|XP_004140253.1| PREDICTED: transcription factor PAR2-like [Cucumis sativus] >gi|700192795|gb|KGN47999.1| hypothetical protein Csa_6G423410 [Cucumis sativus]	AT3G58850.1 | Symbols: PAR2, HLH2 | phy rapidly regulated 2 | chr3:21759562-21759918 REVERSE LENGTH=118	sp|Q9LXR7|PAR2_ARATH Transcription factor PAR2 OS=Arabidopsis thaliana GN=PAR2 PE=3 SV=1	0.00429234
Bhi10G000821	green	chr10	IPR025846 PMR5 N-terminal domain; IPR026057 PC-Esterase; IPR029962 Trichome birefringence-like family	-	gi|449463298|ref|XP_004149371.1| PREDICTED: protein trichome birefringence-like 39 [Cucumis sativus] >gi|700192035|gb|KGN47239.1| hypothetical protein Csa_6G227020 [Cucumis sativus]	AT2G42570.1 | Symbols: TBL39 | TRICHOME BIREFRINGENCE-LIKE 39 | chr2:17717498-17719921 REVERSE LENGTH=367	sp|Q9SIN2|TBL39_ARATH Protein trichome birefringence-like 39 OS=Arabidopsis thaliana GN=TBL39 PE=2 SV=1	0.00428012
Bhi11G001913	turquoise	chr11	-	-	gi|659084348|ref|XP_008442840.1| PREDICTED: uncharacterized protein LOC103486607 [Cucumis melo]	AT3G52740.1 | Symbols: | unknown protein; BEST Arabidopsis thaliana protein match is: unknown protein (TAIR:AT3G44450.1); Has 65 Blast hits to 65 proteins in 13 species: Archae - 0; Bacteria - 0; Metazoa - 0; Fungi - 0; Plants - 65; Viruses - 0; Other Eukaryotes - 0 (source: NCBI BLink). | chr3:19546446-19546868 REVERSE LENGTH=140	-	0.00420384
Bhi10G001362	black	chr10	IPR010987 Glutathione S-transferase, C-terminal-like; IPR004045 Glutathione S-transferase, N-terminal; IPR005955 Maleylacetoacetate isomerase; IPR012336 Thioredoxin-like fold	-	gi|659121901|ref|XP_008460870.1| PREDICTED: glutathione S-transferase 2-like [Cucumis melo]	AT2G02390.1 | Symbols: ATGSTZ1, GST18, GSTZ1 | glutathione S-transferase zeta 1 | chr2:629015-630955 FORWARD LENGTH=221	sp|P57108|GSTZ_EUPES Glutathione S-transferase zeta class OS=Euphorbia esula PE=2 SV=1	0.00419901
Bhi07G000317	turquoise	chr7	IPR006461 PLAC8 motif-containing protein	-	gi|659102930|ref|XP_008452392.1| PREDICTED: cell number regulator 2-like [Cucumis melo]	AT1G14870.1 | Symbols: PCR2 | PLANT CADMIUM RESISTANCE 2 | chr1:5128591-5129458 REVERSE LENGTH=152	sp|Q9LQU4|PCR2_ARATH Protein PLANT CADMIUM RESISTANCE 2 OS=Arabidopsis thaliana GN=PCR2 PE=1 SV=1	0.00408988
Bhi11G000188	yellow	chr11	IPR000109 Proton-dependent oligopeptide transporter family; IPR018456 PTR2 family proton/oligopeptide symporter, conserved site; IPR020846 Major facilitator superfamily domain	GO:0005215 transporter activity; GO:0006810 transport; GO:0016020 membrane;	gi|659096000|ref|XP_008448872.1| PREDICTED: protein NRT1/ PTR FAMILY 6.3-like [Cucumis melo]	AT1G12110.1 | Symbols: NRT1.1, CHL1-1, NRT1, B-1, ATNRT1, CHL1 | nitrate transporter 1.1 | chr1:4105341-4109290 FORWARD LENGTH=590	sp|Q05085|PTR7_ARATH Protein NRT1/ PTR FAMILY 6.3 OS=Arabidopsis thaliana GN=NPF6.3 PE=1 SV=1	0.00403781
Bhi09G000256	turquoise	chr9	IPR012876 Protein of unknown function DUF1677, plant	-	gi|449447910|ref|XP_004141709.1| PREDICTED: uncharacterized protein LOC101205671 [Cucumis sativus] >gi|700190245|gb|KGN45478.1| hypothetical protein Csa_7G448890 [Cucumis sativus]	AT1G72510.2 | Symbols: | Protein of unknown function (DUF1677) | chr1:27303906-27304403 FORWARD LENGTH=165	-	0.00403444
Bhi10G000284	turquoise	chr10	IPR001480 Bulb-type lectin domain; IPR013320 Concanavalin A-like lectin/glucanase domain; IPR024171 S-receptor-like serine/threonine-protein kinase; IPR000719 Protein kinase domain; IPR002290 Serine/threonine/dual specificity protein kinase, catalytic domain; IPR011009 Protein kinase-like domain; IPR008271 Serine/threonine-protein kinase, active site	-	gi|778693113|ref|XP_011653580.1| PREDICTED: G-type lectin S-receptor-like serine/threonine-protein kinase RLK1 [Cucumis sativus]	AT5G60900.1 | Symbols: RLK1 | receptor-like protein kinase 1 | chr5:24498467-24501494 REVERSE LENGTH=748	sp|Q0JEU6|LERK3_ORYSJ G-type lectin S-receptor-like serine/threonine-protein kinase LECRK3 OS=Oryza sativa subsp. japonica GN=LECRK3 PE=3 SV=2	0.00400403
Bhi01G001819	blue	chr1	IPR029063 S-adenosyl-L-methionine-dependent methyltransferase; IPR005299 SAM dependent carboxyl methyltransferase	-	gi|659102371|ref|XP_008452093.1| PREDICTED: salicylate carboxymethyltransferase [Cucumis melo]	AT4G36470.1 | Symbols: | S-adenosyl-L-methionine-dependent methyltransferases superfamily protein | chr4:17215128-17216475 REVERSE LENGTH=371	sp|Q9SPV4|SAMT_CLABR Salicylate carboxymethyltransferase OS=Clarkia breweri GN=SAMT PE=1 SV=1	0.00395751
Bhi09G001076	turquoise	chr9	IPR011009 Protein kinase-like domain; IPR008271 Serine/threonine-protein kinase, active site; IPR000719 Protein kinase domain; IPR002290 Serine/threonine/dual specificity protein kinase, catalytic domain	-	gi|659116415|ref|XP_008458062.1| PREDICTED: serine/threonine-protein kinase OXI1-like [Cucumis melo]	AT3G25250.1 | Symbols: AGC2-1, AGC2, OXI1, AtOXI1 | AGC (cAMP-dependent, cGMP-dependent and protein kinase C) kinase family protein | chr3:9195566-9196949 FORWARD LENGTH=421	sp|Q9LSF1|OXI1_ARATH Serine/threonine-protein kinase OXI1 OS=Arabidopsis thaliana GN=OXI1 PE=1 SV=1	0.0039441
Bhi09G002006	brown	chr9	IPR002016 Haem peroxidase, plant/fungal/bacterial; IPR010255 Haem peroxidase; IPR019794 Peroxidase, active site; IPR019793 Peroxidases heam-ligand binding site; IPR000823 Plant peroxidase	GO:0004601 peroxidase activity; GO:0006979 response to oxidative stress; GO:0020037 heme binding; GO:0055114 oxidation-reduction process;	gi|449437064|ref|XP_004136312.1| PREDICTED: peroxidase 45-like [Cucumis sativus] >gi|700205035|gb|KGN60168.1| hypothetical protein Csa_3G881810 [Cucumis sativus]	AT4G30170.1 | Symbols: | Peroxidase family protein | chr4:14762922-14764482 FORWARD LENGTH=325	sp|Q96522|PER45_ARATH Peroxidase 45 OS=Arabidopsis thaliana GN=PER45 PE=1 SV=1	0.00391778
Bhi12G002011	black	chr12	IPR018247 EF-Hand 1, calcium-binding site; IPR011992 EF-hand domain pair; IPR002048 EF-hand domain	-	gi|449465709|ref|XP_004150570.1| PREDICTED: calmodulin-like protein 8 [Cucumis sativus] >gi|700206538|gb|KGN61657.1| hypothetical protein Csa_2G215510 [Cucumis sativus]	AT4G14640.1 | Symbols: CAM8, AtCML8 | calmodulin 8 | chr4:8397800-8399996 FORWARD LENGTH=151	sp|O23320|CML8_ARATH Calmodulin-like protein 8 OS=Arabidopsis thaliana GN=CML8 PE=1 SV=1	0.0038279
Bhi11G000567	brown	chr11	IPR008949 Isoprenoid synthase domain; IPR008930 Terpenoid cyclases/protein prenyltransferase alpha-alpha toroid; IPR001906 Terpene synthase, N-terminal domain; IPR005630 Terpene synthase, metal-binding domain	-	gi|700201054|gb|KGN56187.1| hypothetical protein Csa_3G095040 [Cucumis sativus]	AT5G23960.2 | Symbols: TPS21 | terpene synthase 21 | chr5:8092969-8095128 FORWARD LENGTH=545	sp|B2KSJ6|AFSY1_CUCME Alpha-farnesene synthase OS=Cucumis melo PE=1 SV=1	0.00377463
Bhi04G001285	yellow	chr4	-	-	gi|778710542|ref|XP_011656590.1| PREDICTED: uncharacterized protein LOC105435754 [Cucumis sativus]	-	-	0.00375267
Bhi03G001341	blue	chr3	-	-	-	-	-	0.00375047
Bhi03G000497	red	chr3	-	-	gi|659079095|ref|XP_008440071.1| PREDICTED: fibrous sheath CABYR-binding protein-like [Cucumis melo]	-	-	0.00373749
Bhi04G001479	green	chr4	IPR006016 UspA; IPR011009 Protein kinase-like domain; IPR000719 Protein kinase domain; IPR017441 Protein kinase, ATP binding site; IPR008271 Serine/threonine-protein kinase, active site; IPR002290 Serine/threonine/dual specificity protein kinase, catalytic domain; IPR013320 Concanavalin A-like lectin/glucanase domain; IPR014729 Rossmann-like alpha/beta/alpha sandwich fold	GO:0006950 response to stress;	gi|659081996|ref|XP_008441611.1| PREDICTED: uncharacterized protein LOC103485693 [Cucumis melo]	AT1G77280.1 | Symbols: | Protein kinase protein with adenine nucleotide alpha hydrolases-like domain | chr1:29031468-29035882 REVERSE LENGTH=794	sp|Q8RWW0|ALE2_ARATH Receptor-like serine/threonine-protein kinase ALE2 OS=Arabidopsis thaliana GN=ALE2 PE=1 SV=1	0.00373193
Bhi03G001145	green	chr3	IPR029044 Nucleotide-diphospho-sugar transferases	-	gi|659125140|ref|XP_008462529.1| PREDICTED: glucomannan 4-beta-mannosyltransferase 9-like [Cucumis melo]	AT5G03760.1 | Symbols: ATCSLA09, CSLA09, ATCSLA9, CSLA9, RAT4 | Nucleotide-diphospho-sugar transferases superfamily protein | chr5:985910-990087 REVERSE LENGTH=533	sp|Q9LZR3|CSLA9_ARATH Glucomannan 4-beta-mannosyltransferase 9 OS=Arabidopsis thaliana GN=CSLA9 PE=2 SV=1	0.00365921
Bhi07G000366	turquoise	chr7	IPR001610 PAC motif; IPR015916 Galactose oxidase, beta-propeller; IPR001810 F-box domain; IPR015915 Kelch-type beta propeller; IPR000014 PAS domain; IPR011498 Kelch repeat type 2	-	gi|659102973|ref|XP_008452411.1| PREDICTED: adagio protein 3 isoform X1 [Cucumis melo]	AT1G68050.1 | Symbols: ADO3, FKF1 | flavin-binding, kelch repeat, f box 1 | chr1:25508737-25510697 FORWARD LENGTH=619	sp|Q9C9W9|ADO3_ARATH Adagio protein 3 OS=Arabidopsis thaliana GN=ADO3 PE=1 SV=1	0.00363919
Bhi12G000321	blue	chr12	IPR001128 Cytochrome P450; IPR002401 Cytochrome P450, E-class, group I; IPR017972 Cytochrome P450, conserved site	GO:0005506 iron ion binding; GO:0016705 oxidoreductase activity, acting on paired donors, with incorporation or reduction of molecular oxygen; GO:0020037 heme binding; GO:0055114 oxidation-reduction process;	gi|659073652|ref|XP_008437178.1| PREDICTED: geraniol 8-hydroxylase-like [Cucumis melo]	AT1G33720.1 | Symbols: CYP76C6 | cytochrome P450, family 76, subfamily C, polypeptide 6 | chr1:12220957-12223981 REVERSE LENGTH=511	sp|Q8VWZ7|C76B6_CATRO Geraniol 8-hydroxylase OS=Catharanthus roseus GN=CYP76B6 PE=1 SV=1	0.00358966
BhiUN189G11	brown	Contig189	-	-	gi|659094635|ref|XP_008448164.1| PREDICTED: uncharacterized protein LOC103490448 [Cucumis melo]	AT4G35320.1 | Symbols: | unknown protein; BEST Arabidopsis thaliana protein match is: unknown protein (TAIR:AT2G17300.1); Has 30201 Blast hits to 17322 proteins in 780 species: Archae - 12; Bacteria - 1396; Metazoa - 17338; Fungi - 3422; Plants - 5037; Viruses - 0; Other Eukaryotes - 2996 (source: NCBI BLink). | chr4:16806139-16806582 REVERSE LENGTH=147	-	0.00357183
Bhi09G000165	brown	chr9	-	-	-	-	-	0.00353411
Bhi04G001082	green	chr4	IPR001841 Zinc finger, RING-type; IPR002035 von Willebrand factor, type A; IPR013083 Zinc finger, RING/FYVE/PHD-type; IPR032838 VWA-Hint protein, Vwaint domain	GO:0005515 protein binding; GO:0008270 zinc ion binding;	gi|449464372|ref|XP_004149903.1| PREDICTED: uncharacterized protein LOC101203839 isoform X1 [Cucumis sativus] >gi|700192628|gb|KGN47832.1| hypothetical protein Csa_6G405940 [Cucumis sativus]	AT2G38970.1 | Symbols: | Zinc finger (C3HC4-type RING finger) family protein | chr2:16274135-16276651 FORWARD LENGTH=692	sp|Q55874|Y103_SYNY3 Uncharacterized protein sll0103 OS=Synechocystis sp. (strain PCC 6803 / Kazusa) GN=sll0103 PE=3 SV=1	0.00345809
Bhi08G001662	brown	chr8	IPR000726 Glycoside hydrolase, family 19, catalytic; IPR018371 Chitin-binding, type 1, conserved site; IPR001002 Chitin-binding, type 1; IPR023346 Lysozyme-like domain; IPR016283 Glycoside hydrolase, family 19	GO:0004568 chitinase activity; GO:0006032 chitin catabolic process; GO:0016998 cell wall macromolecule catabolic process;	gi|659068474|ref|XP_008444611.1| PREDICTED: endochitinase EP3-like [Cucumis melo]	AT3G54420.1 | Symbols: ATEP3, ATCHITIV, CHIV, EP3 | homolog of carrot EP3-3 chitinase | chr3:20145935-20147034 FORWARD LENGTH=273	sp|Q9M2U5|CHI5_ARATH Endochitinase EP3 OS=Arabidopsis thaliana GN=EP3 PE=1 SV=1	0.00338229
Bhi04G000018	turquoise	chr4	-	-	gi|659089577|ref|XP_008445585.1| PREDICTED: uncharacterized protein LOC103488565 [Cucumis melo]	AT5G11070.1 | Symbols: | unknown protein; Has 1807 Blast hits to 1807 proteins in 277 species: Archae - 0; Bacteria - 0; Metazoa - 736; Fungi - 347; Plants - 385; Viruses - 0; Other Eukaryotes - 339 (source: NCBI BLink). | chr5:3516440-3516898 REVERSE LENGTH=152	-	0.00326266
Bhi07G001459	black	chr7	IPR017972 Cytochrome P450, conserved site; IPR002401 Cytochrome P450, E-class, group I; IPR001128 Cytochrome P450	GO:0016705 oxidoreductase activity, acting on paired donors, with incorporation or reduction of molecular oxygen; GO:0055114 oxidation-reduction process;	gi|778704874|ref|XP_004135495.2| PREDICTED: cytochrome P450 71B37-like [Cucumis sativus]	AT3G26300.1 | Symbols: CYP71B34 | cytochrome P450, family 71, subfamily B, polypeptide 34 | chr3:9639199-9640866 REVERSE LENGTH=500	sp|Q9LIP6|C71BV_ARATH Cytochrome P450 71B34 OS=Arabidopsis thaliana GN=CYP71B34 PE=2 SV=1	0.00302375
Bhi01G000787	blue	chr1	-	-	-	-	-	0.00296794
Bhi08G001018	yellow	chr8	IPR001471 AP2/ERF domain; IPR016177 DNA-binding domain	GO:0003700 transcription factor activity, sequence-specific DNA binding; GO:0006355 regulation of transcription, DNA-templated;	gi|449439397|ref|XP_004137472.1| PREDICTED: ethylene-responsive transcription factor CRF3-like [Cucumis sativus] >gi|700209021|gb|KGN64117.1| hypothetical protein Csa_1G042290 [Cucumis sativus]	AT4G27950.1 | Symbols: CRF4 | cytokinin response factor 4 | chr4:13909732-13910739 REVERSE LENGTH=335	sp|Q9SUE3|CRF4_ARATH Ethylene-responsive transcription factor CRF4 OS=Arabidopsis thaliana GN=CRF4 PE=1 SV=2	0.0029402
Bhi08G001278	blue	chr8	IPR001841 Zinc finger, RING-type; IPR018957 Zinc finger, C3HC4 RING-type; IPR017907 Zinc finger, RING-type, conserved site; IPR013083 Zinc finger, RING/FYVE/PHD-type	GO:0005515 protein binding; GO:0008270 zinc ion binding;	gi|659068046|ref|XP_008442466.1| PREDICTED: E3 ubiquitin-protein ligase RMA1H1-like [Cucumis melo] >gi|659068048|ref|XP_008442474.1| PREDICTED: E3 ubiquitin-protein ligase RMA1H1-like [Cucumis melo] >gi|659068052|ref|XP_008442488.1| PREDICTED: E3 ubiquitin-protein ligase RMA1H1-like [Cucumis melo]	AT4G03510.2 | Symbols: RMA1, ATRMA1 | RING membrane-anchor 1 | chr4:1557905-1558654 REVERSE LENGTH=249	sp|Q6R567|RMA1_CAPAN E3 ubiquitin-protein ligase RMA1H1 OS=Capsicum annuum GN=RMA1H1 PE=1 SV=1	0.00290446
Bhi06G001199	brown	chr6	IPR012511 S-adenosyl-l-methionine decarboxylase leader peptide	-	gi|1176253379|ref|WP_082181577.1| hypothetical protein [Acinetobacter baumannii]	AT3G02468.1 | Symbols: CPuORF9 | conserved peptide upstream open reading frame 9 | chr3:509815-510068 FORWARD LENGTH=52	-	0.00284127
Bhi12G000986	blue	chr12	IPR011006 CheY-like superfamily; IPR001789 Signal transduction response regulator, receiver domain	-	gi|659072511|ref|XP_008465907.1| PREDICTED: two-component response regulator ORR10-like [Cucumis melo]	AT3G57040.1 | Symbols: ARR9, ATRR4 | response regulator 9 | chr3:21110059-21111228 FORWARD LENGTH=234	sp|O80366|ARR9_ARATH Two-component response regulator ARR9 OS=Arabidopsis thaliana GN=ARR9 PE=1 SV=1	0.00282075
Bhi03G001618	blue	chr3	-	-	gi|659069192|ref|XP_008448581.1| PREDICTED: uncharacterized protein LOC103490707 isoform X2 [Cucumis melo]	AT5G02020.2 | Symbols: SIS | Encodes a protein involved in salt tolerance, names SIS (Salt Induced Serine rich). | chr5:386999-387921 REVERSE LENGTH=137	-	0.00282047
BhiUN954G7	green	Contig954	-	-	-	-	-	0.00281799
Bhi09G000906	blue	chr9	IPR000232 Heat shock factor (HSF)-type, DNA-binding; IPR011991 Winged helix-turn-helix DNA-binding domain; IPR027725 Heat shock transcription factor family	GO:0003700 transcription factor activity, sequence-specific DNA binding; GO:0005634 nucleus; GO:0006355 regulation of transcription, DNA-templated; GO:0043565 sequence-specific DNA binding;	gi|449458520|ref|XP_004146995.1| PREDICTED: heat stress transcription factor A-6b-like isoform X2 [Cucumis sativus]	AT3G22830.1 | Symbols: AT-HSFA6B, HSFA6B | heat shock transcription factor A6B | chr3:8078981-8080895 FORWARD LENGTH=406	sp|Q9LUH8|HFA6B_ARATH Heat stress transcription factor A-6b OS=Arabidopsis thaliana GN=HSFA6b PE=2 SV=1	0.00281339
Bhi01G002010	yellow	chr1	IPR011051 RmlC-like cupin domain; IPR008778 Pirin, C-terminal domain; IPR012093 Pirin; IPR003829 Pirin, N-terminal domain; IPR014710 RmlC-like jelly roll fold	-	gi|778690142|ref|XP_004152078.2| PREDICTED: pirin-like protein [Cucumis sativus]	AT2G43120.1 | Symbols: | RmlC-like cupins superfamily protein | chr2:17927339-17928871 FORWARD LENGTH=321	sp|Q9SEE4|PIRL_SOLLC Pirin-like protein OS=Solanum lycopersicum PE=2 SV=1	0.00277493
Bhi01G000534	green	chr1	IPR017441 Protein kinase, ATP binding site; IPR000719 Protein kinase domain; IPR002290 Serine/threonine/dual specificity protein kinase, catalytic domain; IPR004041 NAF domain; IPR018451 NAF/FISL domain; IPR011009 Protein kinase-like domain; IPR008271 Serine/threonine-protein kinase, active site	GO:0005524 ATP binding;	gi|1035393651|ref|XP_008438596.2| PREDICTED: LOW QUALITY PROTEIN: CBL-interacting serine/threonine-protein kinase 7-like [Cucumis melo]	AT3G23000.1 | Symbols: CIPK7, SnRK3.10, PKS7, ATSRPK1, ATSR2 | CBL-interacting protein kinase 7 | chr3:8172654-8173943 FORWARD LENGTH=429	sp|Q9XIW0|CIPK7_ARATH CBL-interacting serine/threonine-protein kinase 7 OS=Arabidopsis thaliana GN=CIPK7 PE=1 SV=1	0.00274965
Bhi12G000188	yellow	chr12	IPR013657 UAA transporter	GO:0055085 transmembrane transport;	gi|659073704|ref|XP_008437207.1| PREDICTED: UDP-galactose/UDP-glucose transporter 2 [Cucumis melo]	AT4G23010.1 | Symbols: ATUTR2, UTR2 | UDP-galactose transporter 2 | chr4:12060318-12062486 REVERSE LENGTH=345	sp|Q29Q28|UTR2_ARATH UDP-galactose/UDP-glucose transporter 2 OS=Arabidopsis thaliana GN=UTR2 PE=2 SV=1	0.00273261
BhiUN318G1	turquoise	Contig318	IPR027417 P-loop containing nucleoside triphosphate hydrolase; IPR014016 UvrD-like Helicase, ATP-binding domain	-	gi|659120507|ref|XP_008460225.1| PREDICTED: uncharacterized protein LOC103499108 [Cucumis melo] >gi|1035418418|ref|XP_016902516.1| PREDICTED: uncharacterized protein LOC103499108 [Cucumis melo]	AT1G65810.1 | Symbols: | P-loop containing nucleoside triphosphate hydrolases superfamily protein | chr1:24477043-24480728 REVERSE LENGTH=1050	sp|O15050|TRNK1_HUMAN TPR and ankyrin repeat-containing protein 1 OS=Homo sapiens GN=TRANK1 PE=2 SV=4	0.00271709
Bhi06G000274	green	chr6	IPR029058 Alpha/Beta hydrolase fold; IPR000073 Alpha/beta hydrolase fold-1	-	gi|659118938|ref|XP_008459387.1| PREDICTED: putative methylesterase 11, chloroplastic [Cucumis melo]	AT3G29770.1 | Symbols: ATMES11, MES11 | methyl esterase 11 | chr3:11648471-11650565 FORWARD LENGTH=390	sp|Q9FW03|MES11_ARATH Putative methylesterase 11, chloroplastic OS=Arabidopsis thaliana GN=MES11 PE=2 SV=1	0.00268859
Bhi09G002895	green	chr9	IPR011009 Protein kinase-like domain; IPR001245 Serine-threonine/tyrosine-protein kinase catalytic domain; IPR032675 Leucine-rich repeat domain, L domain-like; IPR013320 Concanavalin A-like lectin/glucanase domain; IPR000719 Protein kinase domain; IPR002290 Serine/threonine/dual specificity protein kinase, catalytic domain; IPR021720 Malectin; IPR008271 Serine/threonine-protein kinase, active site	-	gi|659127571|ref|XP_008463771.1| PREDICTED: probable leucine-rich repeat receptor-like serine/threonine-protein kinase At3g14840 [Cucumis melo]	AT3G14840.2 | Symbols: | Leucine-rich repeat transmembrane protein kinase | chr3:4988271-4993891 FORWARD LENGTH=1020	sp|C0LGN2|Y3148_ARATH Probable leucine-rich repeat receptor-like serine/threonine-protein kinase At3g14840 OS=Arabidopsis thaliana GN=LRR-RLK PE=2 SV=1	0.0026883
Bhi09G001226	yellow	chr9	-	-	gi|302785598|ref|XP_002974570.1| hypothetical protein SELMODRAFT_442529 [Selaginella moellendorffii] >gi|300157465|gb|EFJ24090.1| hypothetical protein SELMODRAFT_442529 [Selaginella moellendorffii]	-	-	0.00263844
Bhi05G001220	yellow	chr5	IPR016461 O-methyltransferase COMT-type; IPR001077 O-methyltransferase, family 2; IPR029063 S-adenosyl-L-methionine-dependent methyltransferase; IPR012967 Plant methyltransferase dimerisation; IPR011991 Winged helix-turn-helix DNA-binding domain	GO:0008168 methyltransferase activity;	gi|778723662|ref|XP_004151735.2| PREDICTED: trans-resveratrol di-O-methyltransferase [Cucumis sativus] >gi|700188249|gb|KGN43482.1| hypothetical protein Csa_7G039790 [Cucumis sativus]	AT4G35160.1 | Symbols: | O-methyltransferase family protein | chr4:16730989-16732808 REVERSE LENGTH=382	sp|B6VJS4|ROMT_VITVI Trans-resveratrol di-O-methyltransferase OS=Vitis vinifera GN=ROMT PE=1 SV=2	0.00260534
Bhi06G001520	blue	chr6	IPR000270 PB1 domain; IPR003311 AUX/IAA protein	GO:0005515 protein binding;	gi|449442931|ref|XP_004139234.1| PREDICTED: auxin-responsive protein IAA4 [Cucumis sativus] >gi|700205690|gb|KGN60809.1| hypothetical protein Csa_2G011420 [Cucumis sativus]	AT1G04240.1 | Symbols: SHY2, IAA3 | AUX/IAA transcriptional regulator family protein | chr1:1128564-1129319 REVERSE LENGTH=189	sp|O24542|AX22D_VIGRR Auxin-induced protein 22D OS=Vigna radiata var. radiata GN=AUX22D PE=2 SV=1	0.00253082
Bhi08G000833	green	chr8	IPR016166 FAD-binding, type 2; IPR006094 FAD linked oxidase, N-terminal; IPR012951 Berberine/berberine-like; IPR016169 CO dehydrogenase flavoprotein-like, FAD-binding, subdomain 2; IPR016167 FAD-binding, type 2, subdomain 1	GO:0003824 catalytic activity; GO:0016614 oxidoreductase activity, acting on CH-OH group of donors; GO:0050660 flavin adenine dinucleotide binding; GO:0055114 oxidation-reduction process;	gi|778662000|ref|XP_011659198.1| PREDICTED: cannabidiolic acid synthase-like 1 [Cucumis sativus]	AT4G20820.1 | Symbols: | FAD-binding Berberine family protein | chr4:11150160-11151758 FORWARD LENGTH=532	sp|A6P6W0|CASL1_CANSA Cannabidiolic acid synthase-like 1 OS=Cannabis sativa GN=CBDAS2 PE=2 SV=1	0.00250862
Bhi10G000819	black	chr10	IPR000504 RNA recognition motif domain; IPR012677 Nucleotide-binding alpha-beta plait domain	GO:0003676 nucleic acid binding;	gi|1026028062|ref|XP_016560286.1| PREDICTED: multiple RNA-binding domain-containing protein 1 isoform X2 [Capsicum annuum]	AT4G19610.1 | Symbols: | nucleotide binding;nucleic acid binding;RNA binding | chr4:10677482-10681623 FORWARD LENGTH=816	sp|Q5BGA9|MRD1_EMENI Multiple RNA-binding domain-containing protein 1 OS=Emericella nidulans (strain FGSC A4 / ATCC 38163 / CBS 112.46 / NRRL 194 / M139) GN=mrd1 PE=3 SV=1	0.00249711
Bhi05G000945	turquoise	chr5	IPR002213 UDP-glucuronosyl/UDP-glucosyltransferase	GO:0008152 metabolic process; GO:0016758 transferase activity, transferring hexosyl groups;	gi|659109956|ref|XP_008454970.1| PREDICTED: scopoletin glucosyltransferase-like [Cucumis melo]	AT2G15490.3 | Symbols: UGT73B4 | UDP-glycosyltransferase 73B4 | chr2:6761750-6763398 FORWARD LENGTH=481	sp|Q9AT54|SCGT_TOBAC Scopoletin glucosyltransferase OS=Nicotiana tabacum GN=TOGT1 PE=1 SV=1	0.00245093
Bhi07G000471	yellow	chr7	IPR009040 Ferritin- like diiron domain; IPR001519 Ferritin; IPR012347 Ferritin-related; IPR009078 Ferritin-like superfamily; IPR008331 Ferritin/DPS protein domain	-	gi|778701365|ref|XP_011655010.1| PREDICTED: ferritin-3, chloroplastic [Cucumis sativus] >gi|700195516|gb|KGN50693.1| hypothetical protein Csa_5G215130 [Cucumis sativus]	AT2G40300.1 | Symbols: ATFER4, FER4 | ferritin 4 | chr2:16831501-16833214 REVERSE LENGTH=259	sp|Q948P6|FRI3_SOYBN Ferritin-3, chloroplastic OS=Glycine max PE=2 SV=1	0.00243037
Bhi11G001819	brown	chr11	IPR006447 Myb domain, plants; IPR001005 SANT/Myb domain; IPR009057 Homeodomain-like; IPR017930 Myb domain	-	gi|449440371|ref|XP_004137958.1| PREDICTED: protein REVEILLE 8-like isoform X2 [Cucumis sativus] >gi|700203793|gb|KGN58926.1| hypothetical protein Csa_3G736740 [Cucumis sativus]	AT3G09600.1 | Symbols: | Homeodomain-like superfamily protein | chr3:2946459-2948270 FORWARD LENGTH=298	sp|Q8RWU3|RVE8_ARATH Protein REVEILLE 8 OS=Arabidopsis thaliana GN=RVE8 PE=2 SV=1	0.00242931
Bhi09G000021	brown	chr9	IPR011990 Tetratricopeptide-like helical domain; IPR013026 Tetratricopeptide repeat-containing domain	GO:0005515 protein binding;	gi|449436142|ref|XP_004135853.1| PREDICTED: uncharacterized protein LOC101208051 [Cucumis sativus] >gi|700190040|gb|KGN45273.1| hypothetical protein Csa_7G432550 [Cucumis sativus]	AT1G80130.1 | Symbols: | Tetratricopeptide repeat (TPR)-like superfamily protein | chr1:30141250-30142478 REVERSE LENGTH=305	-	0.00240416
Bhi03G001291	green	chr3	IPR020381 Proteinase inhibitor I25, cystatin, conserved region	-	gi|700199666|gb|KGN54824.1| hypothetical protein Csa_4G508520 [Cucumis sativus]	AT5G47550.1 | Symbols: | Cystatin/monellin superfamily protein | chr5:19286596-19286964 REVERSE LENGTH=122	sp|Q10Q46|CYT6_ORYSJ Cysteine proteinase inhibitor 6 OS=Oryza sativa subsp. japonica GN=Os03g0210200 PE=3 SV=1	0.00236825
Bhi08G000159	brown	chr8	-	-	gi|659094491|ref|XP_008448087.1| PREDICTED: uncharacterized protein LOC103490375 [Cucumis melo]	-	-	0.00236064
Bhi09G000208	turquoise	chr9	IPR000070 Pectinesterase, catalytic; IPR018040 Pectinesterase, active site; IPR012334 Pectin lyase fold; IPR011050 Pectin lyase fold/virulence factor	GO:0005618 cell wall; GO:0030599 pectinesterase activity; GO:0042545 cell wall modification;	gi|1035421112|ref|XP_016902864.1| PREDICTED: pectinesterase-like [Cucumis melo]	AT3G14310.1 | Symbols: ATPME3, PME3 | pectin methylesterase 3 | chr3:4772214-4775095 REVERSE LENGTH=592	sp|P83948|PME3_CITSI Pectinesterase 3 OS=Citrus sinensis PE=1 SV=1	0.00234429
Bhi05G000366	turquoise	chr5	IPR011031 Multihaem cytochrome; IPR005735 Zinc finger, LSD1-type	-	gi|1216303242|ref|XP_021593714.1| protein LOL1 [Manihot esculenta] >gi|1216303244|ref|XP_021593716.1| protein LOL1 [Manihot esculenta] >gi|1216303246|ref|XP_021593717.1| protein LOL1 [Manihot esculenta] >gi|1216303248|ref|XP_021593718.1| protein LOL1 [Manihot esculenta] >gi|1035900147|gb|OAY29748.1| hypothetical protein MANES_15G169200 [Manihot esculenta]	AT1G32540.1 | Symbols: LOL1 | lsd one like 1 | chr1:11768253-11769591 FORWARD LENGTH=187	sp|Q93ZB1|LOL1_ARATH Protein LOL1 OS=Arabidopsis thaliana GN=LOL1 PE=2 SV=1	0.00234045
Bhi10G001487	black	chr10	IPR004265 Plant disease resistance response protein	-	gi|449458582|ref|XP_004147026.1| PREDICTED: dirigent protein 23 [Cucumis sativus] >gi|700206792|gb|KGN61911.1| Disease resistance response protein [Cucumis sativus]	AT2G21100.1 | Symbols: | Disease resistance-responsive (dirigent-like protein) family protein | chr2:9048687-9049336 REVERSE LENGTH=187	sp|Q84TH6|DIR23_ARATH Dirigent protein 23 OS=Arabidopsis thaliana GN=DIR23 PE=2 SV=1	0.00233884
Bhi11G001170	turquoise	chr11	IPR008979 Galactose-binding domain-like; IPR006946 Domain of unknown function DUF642	-	gi|449464002|ref|XP_004149718.1| PREDICTED: uncharacterized protein LOC101216438 [Cucumis sativus] >gi|700203447|gb|KGN58580.1| hypothetical protein Csa_3G689790 [Cucumis sativus]	AT3G08030.1 | Symbols: | Protein of unknown function, DUF642 | chr3:2564191-2565819 FORWARD LENGTH=365	-	0.00229571
Bhi01G000631	turquoise	chr1	IPR006121 Heavy metal-associated domain, HMA	GO:0030001 metal ion transport; GO:0046872 metal ion binding;	gi|659076512|ref|XP_008438720.1| PREDICTED: WAG22 antigen [Cucumis melo]	AT3G06130.1 | Symbols: | Heavy metal transport/detoxification superfamily protein | chr3:1853048-1854673 REVERSE LENGTH=473	sp|Q9C9A3|HIP20_ARATH Heavy metal-associated isoprenylated plant protein 20 OS=Arabidopsis thaliana GN=HIPP20 PE=2 SV=1	0.00227566
Bhi05G001688	turquoise	chr5	IPR001932 PPM-type phosphatase domain; IPR015655 Protein phosphatase 2C family	GO:0003824 catalytic activity;	gi|659110541|ref|XP_008455279.1| PREDICTED: probable protein phosphatase 2C 58 [Cucumis melo]	AT4G28400.1 | Symbols: | Protein phosphatase 2C family protein | chr4:14048499-14050118 FORWARD LENGTH=283	sp|Q93YW5|P2C58_ARATH Probable protein phosphatase 2C 58 OS=Arabidopsis thaliana GN=At4g28400 PE=2 SV=1	0.00223018
Bhi08G000951	blue	chr8	IPR009039 EAR; IPR004518 NTP pyrophosphohydrolase MazG, putative catalytic core; IPR011394 NTP Pyrophosphohydrolase MazG-related, RS21-C6	-	gi|1012005902|ref|XP_015943153.1| dCTP pyrophosphatase 1 [Arachis duranensis]	AT3G25400.1 | Symbols: | CONTAINS InterPro DOMAIN/s: NTP Pyrophosphohydrolase MazG-related, RS21-C6 (InterPro:IPR011394), EAR (InterPro:IPR009039), NTP pyrophosphohydrolase MazG, putative catalytic core (InterPro:IPR004518); Has 1123 Blast hits to 1121 proteins in 452 species: Archae - 22; Bacteria - 753; Metazoa - 81; Fungi - 3; Plants - 83; Viruses - 0; Other Eukaryotes - 181 (source: NCBI BLin…	sp|Q9QY93|DCTP1_MOUSE dCTP pyrophosphatase 1 OS=Mus musculus GN=Dctpp1 PE=1 SV=1	0.00221329
Bhi07G001111	black	chr7	IPR017853 Glycoside hydrolase superfamily; IPR000322 Glycoside hydrolase family 31; IPR031727 Galactose mutarotase, N-terminal barrel; IPR030458 Glycosyl hydrolases family 31, active site; IPR011013 Galactose mutarotase-like domain	-	gi|778705971|ref|XP_011655772.1| PREDICTED: alpha-xylosidase 1-like [Cucumis sativus] >gi|700196898|gb|KGN52075.1| hypothetical protein Csa_5G609610 [Cucumis sativus]	AT1G68560.1 | Symbols: ATXYL1, XYL1, TRG1 | alpha-xylosidase 1 | chr1:25734435-25737897 REVERSE LENGTH=915	sp|Q9S7Y7|XYL1_ARATH Alpha-xylosidase 1 OS=Arabidopsis thaliana GN=XYL1 PE=1 SV=1	0.00220361
Bhi05G000343	yellow	chr5	IPR018108 Mitochondrial substrate/solute carrier; IPR023395 Mitochondrial carrier domain	-	gi|659132016|ref|XP_008465971.1| PREDICTED: mitochondrial carnitine/acylcarnitine carrier-like protein [Cucumis melo]	AT5G46800.1 | Symbols: BOU | Mitochondrial substrate carrier family protein | chr5:18988779-18989810 REVERSE LENGTH=300	sp|Q93XM7|MCAT_ARATH Mitochondrial carnitine/acylcarnitine carrier-like protein OS=Arabidopsis thaliana GN=BOU PE=2 SV=1	0.00219523
Bhi10G001144	red	chr10	-	-	gi|223544460|gb|EEF45979.1| conserved hypothetical protein [Ricinus communis]	-	-	0.00218688
Bhi11G001529	red	chr11	IPR032795 DUF3741-associated sequence motif	-	gi|449439882|ref|XP_004137714.1| PREDICTED: uncharacterized protein LOC101211240 [Cucumis sativus] >gi|700203617|gb|KGN58750.1| hypothetical protein Csa_3G731120 [Cucumis sativus]	AT5G01370.1 | Symbols: ACI1 | ALC-interacting protein 1 | chr5:152575-154295 FORWARD LENGTH=427	-	0.00218521
Bhi05G001558	black	chr5	-	-	-	-	-	0.00215692
Bhi04G001562	blue	chr4	IPR005202 Transcription factor GRAS; IPR030028 Scarecrow-like protein 26/nodulation signalling pathway 2	-	gi|659089769|ref|XP_008445682.1| PREDICTED: nodulation-signaling pathway 2 protein [Cucumis melo]	AT4G08250.1 | Symbols: | GRAS family transcription factor | chr4:5196787-5198238 FORWARD LENGTH=483	sp|Q5NE24|NSP2_MEDTR Nodulation-signaling pathway 2 protein OS=Medicago truncatula GN=NSP2 PE=1 SV=1	0.00208864
Bhi01G001791	brown	chr1	IPR008511 Protein BYPASS-related	-	gi|449457590|ref|XP_004146531.1| PREDICTED: uncharacterized protein LOC101212488 [Cucumis sativus] >gi|700198193|gb|KGN53351.1| hypothetical protein Csa_4G049100 [Cucumis sativus]	AT1G63930.1 | Symbols: ROH1 | from the Czech 'roh' meaning 'corner' | chr1:23727927-23729174 FORWARD LENGTH=415	-	0.00199289
Bhi04G002014	brown	chr4	IPR005079 Peptidase C45	-	gi|449442062|ref|XP_004138801.1| PREDICTED: uncharacterized protein LOC101214789 [Cucumis sativus]	-	-	0.00187045
Bhi01G001656	turquoise	chr1	IPR021954 Protein CHLORORESPIRATORY REDUCTION 7	-	gi|659125939|ref|XP_008462928.1| PREDICTED: uncharacterized protein LOC103501190 [Cucumis melo]	AT5G39210.1 | Symbols: CRR7 | chlororespiratory reduction 7 | chr5:15703231-15703999 FORWARD LENGTH=156	sp|Q9FL87|CRR7_ARATH Protein CHLORORESPIRATORY REDUCTION 7, chloroplastic OS=Arabidopsis thaliana GN=CRR7 PE=2 SV=1	0.00186162
Bhi04G001990	turquoise	chr4	IPR010255 Haem peroxidase; IPR002016 Haem peroxidase, plant/fungal/bacterial; IPR019793 Peroxidases heam-ligand binding site; IPR000823 Plant peroxidase	GO:0004601 peroxidase activity; GO:0006979 response to oxidative stress; GO:0020037 heme binding; GO:0055114 oxidation-reduction process;	gi|659081428|ref|XP_008441330.1| PREDICTED: peroxidase 55-like [Cucumis melo]	AT5G14130.1 | Symbols: | Peroxidase superfamily protein | chr5:4558862-4560028 REVERSE LENGTH=330	sp|Q96509|PER55_ARATH Peroxidase 55 OS=Arabidopsis thaliana GN=PER55 PE=1 SV=1	0.00185198
[truncated: 215 more rows]
